# Supplementary material for: Antibacterial Barbituric Acid Analogues Inspired from Natural 3-Acyltetramic Acids; Synthesis, Tautomerism and Structure and Physicochemical Property-Antibacterial Activity Relationships
Source: MDPI journal article supplement (doi:10.3390/molecules20033582), 2015-02-20

1H exp G585.esp

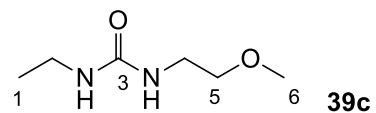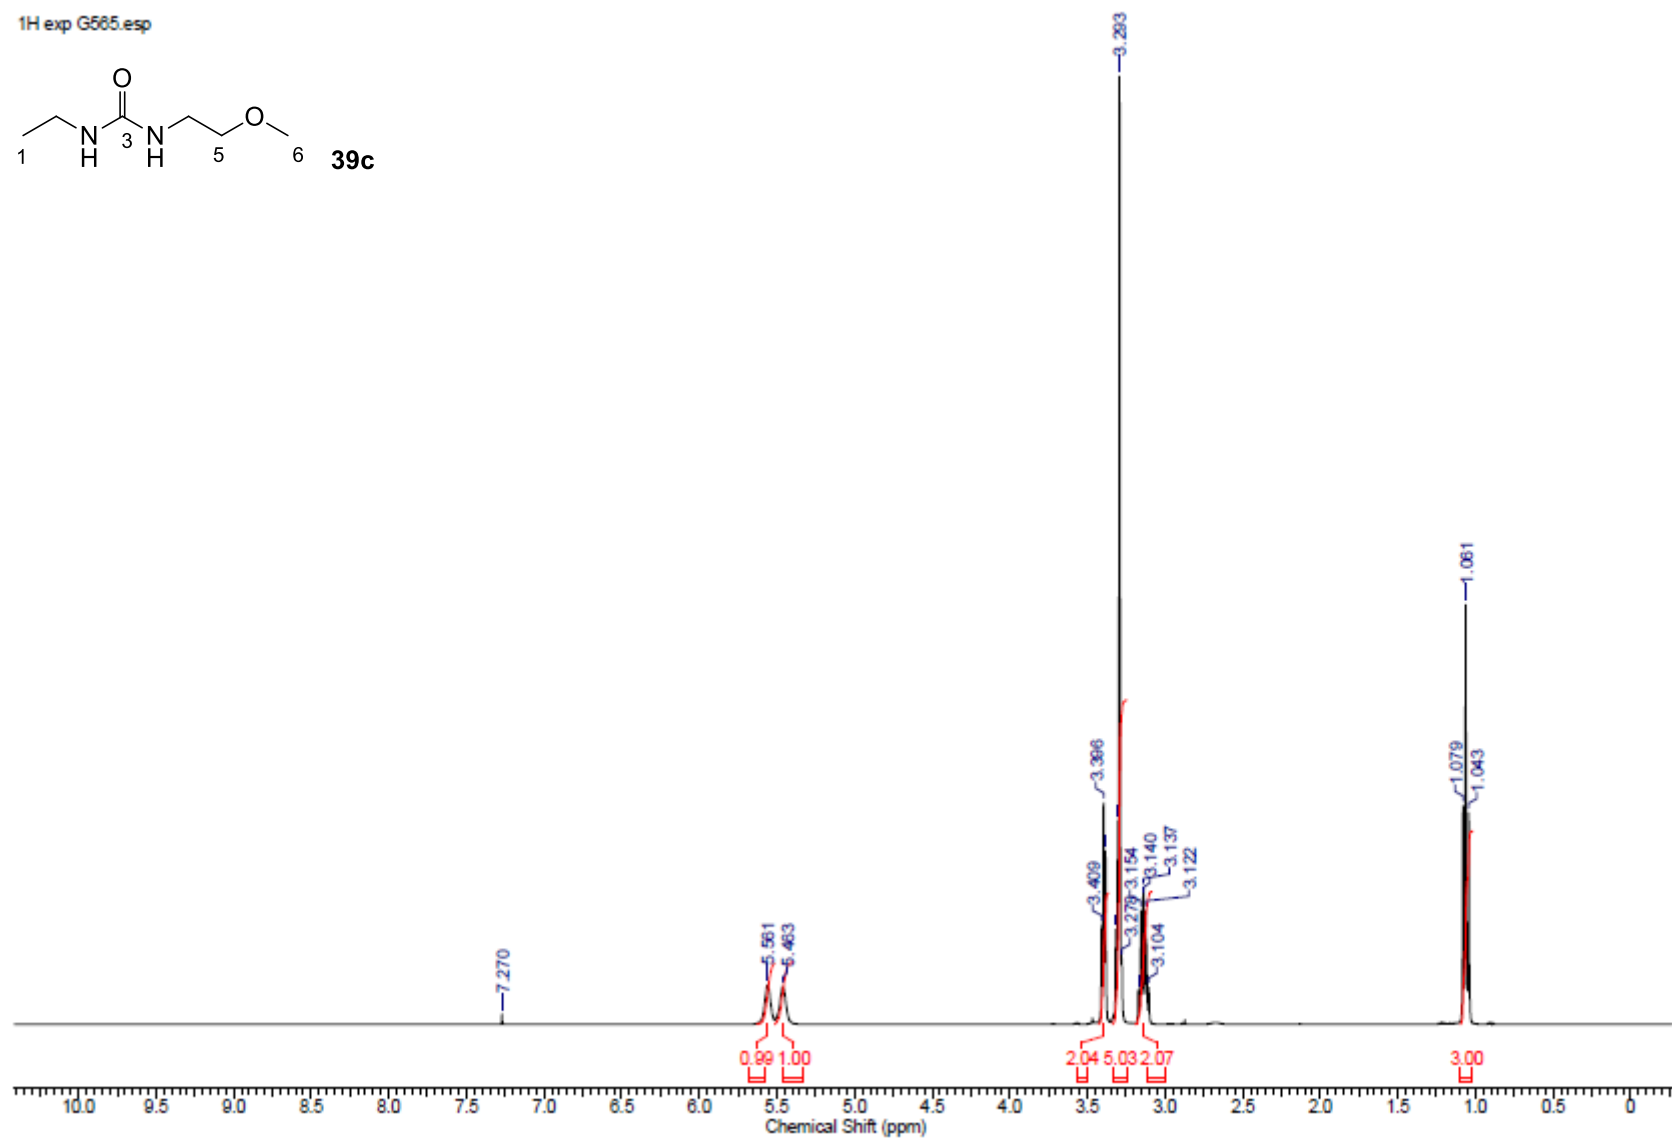

13C exp G565.esp

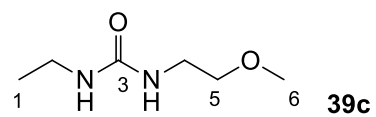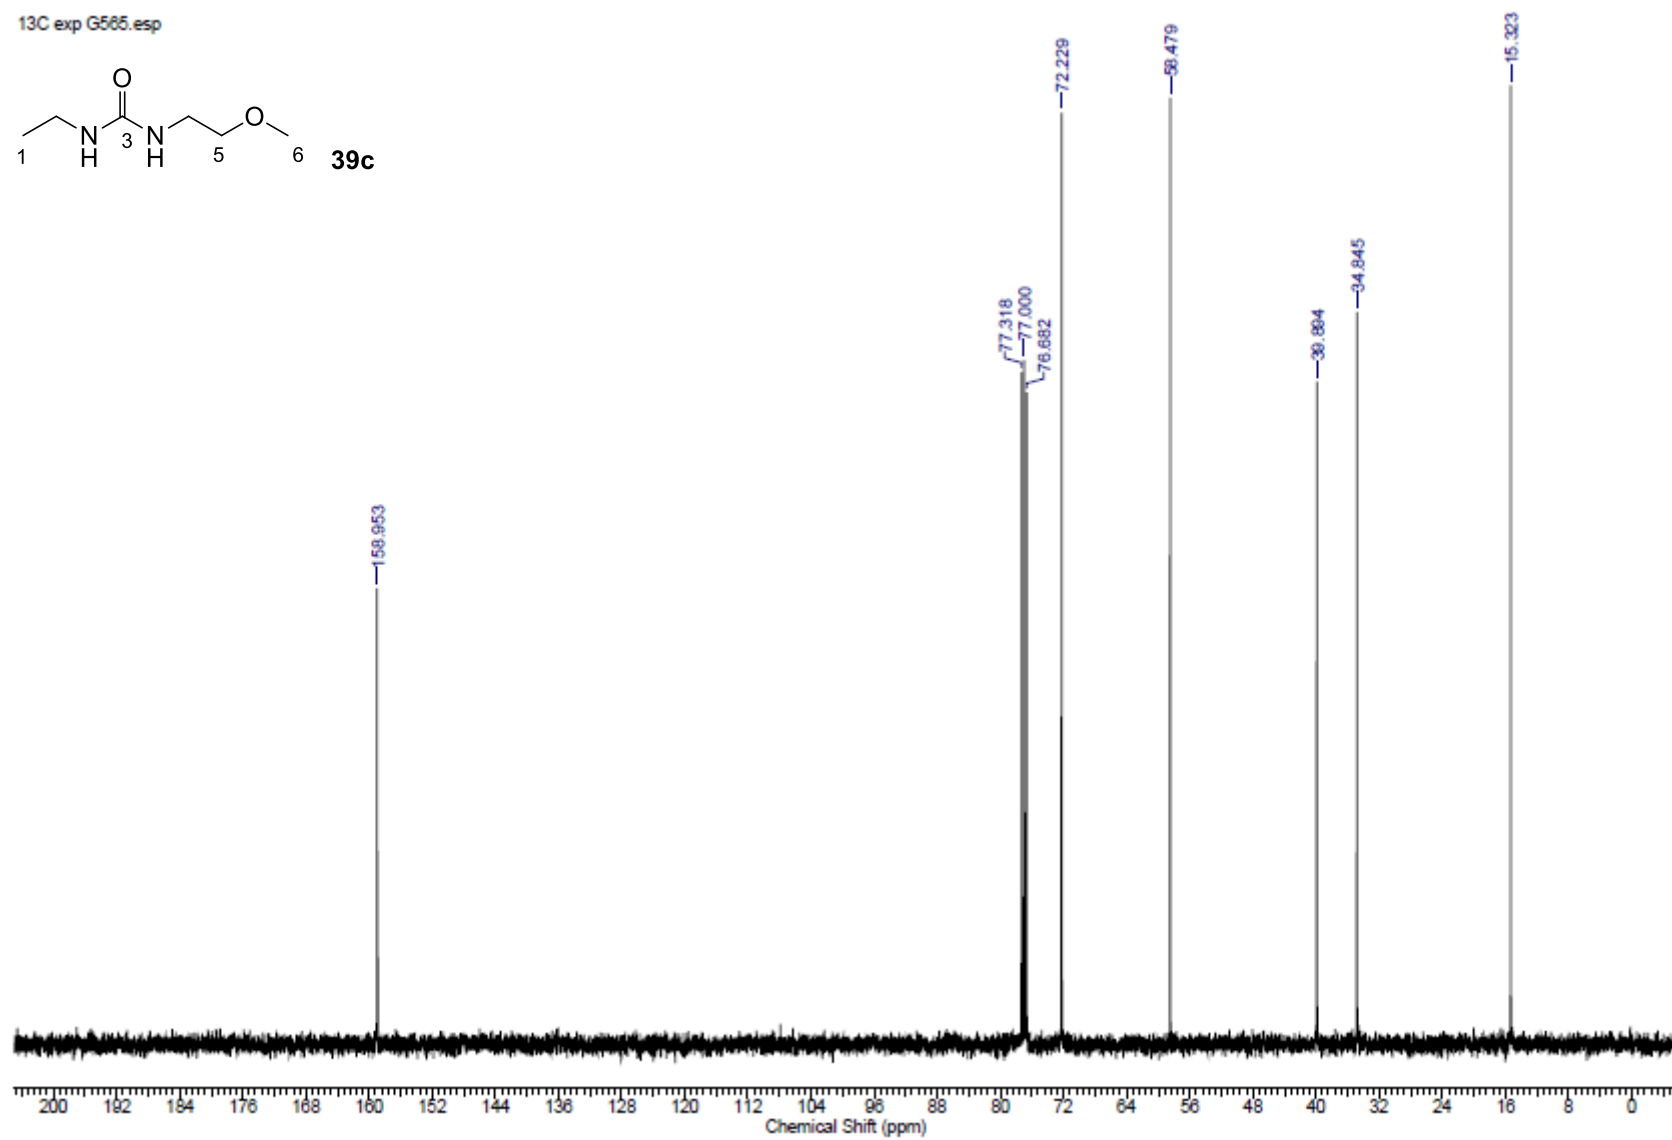

1H exp G473 Z7.esp

VerticalScaleFactor = 1

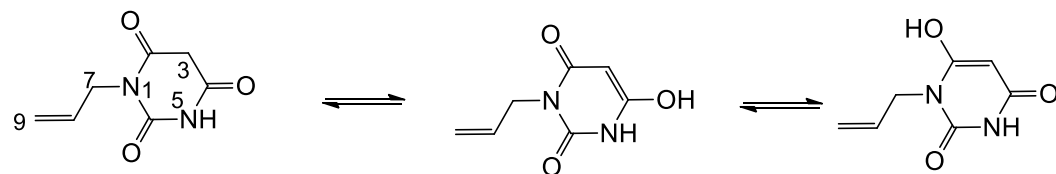

40a in DMSO

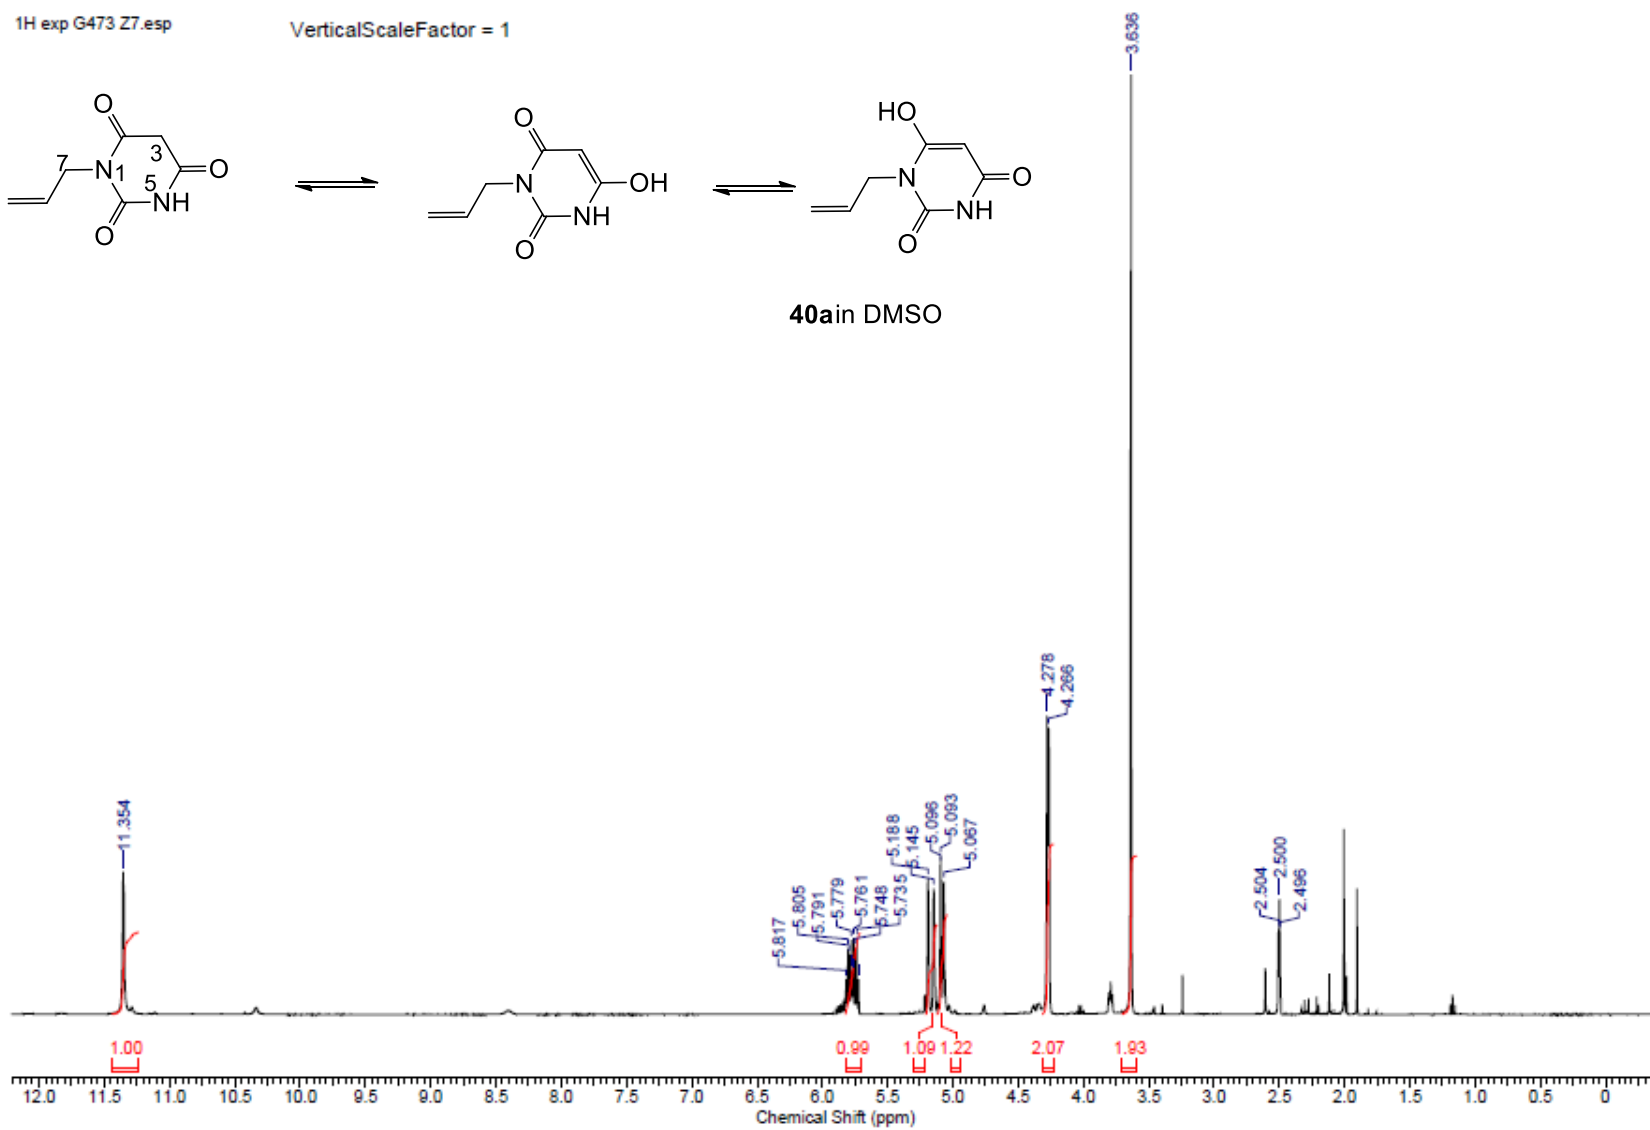

13C exp G473 Z7.esp

VerticalScaleFactor = 1

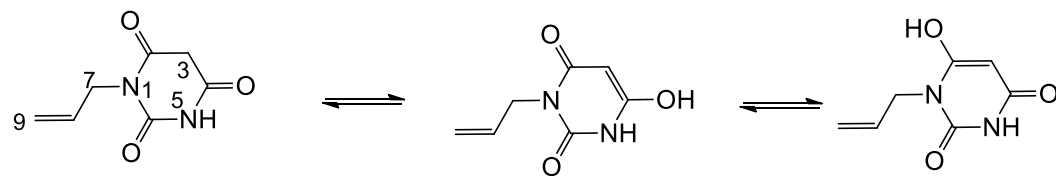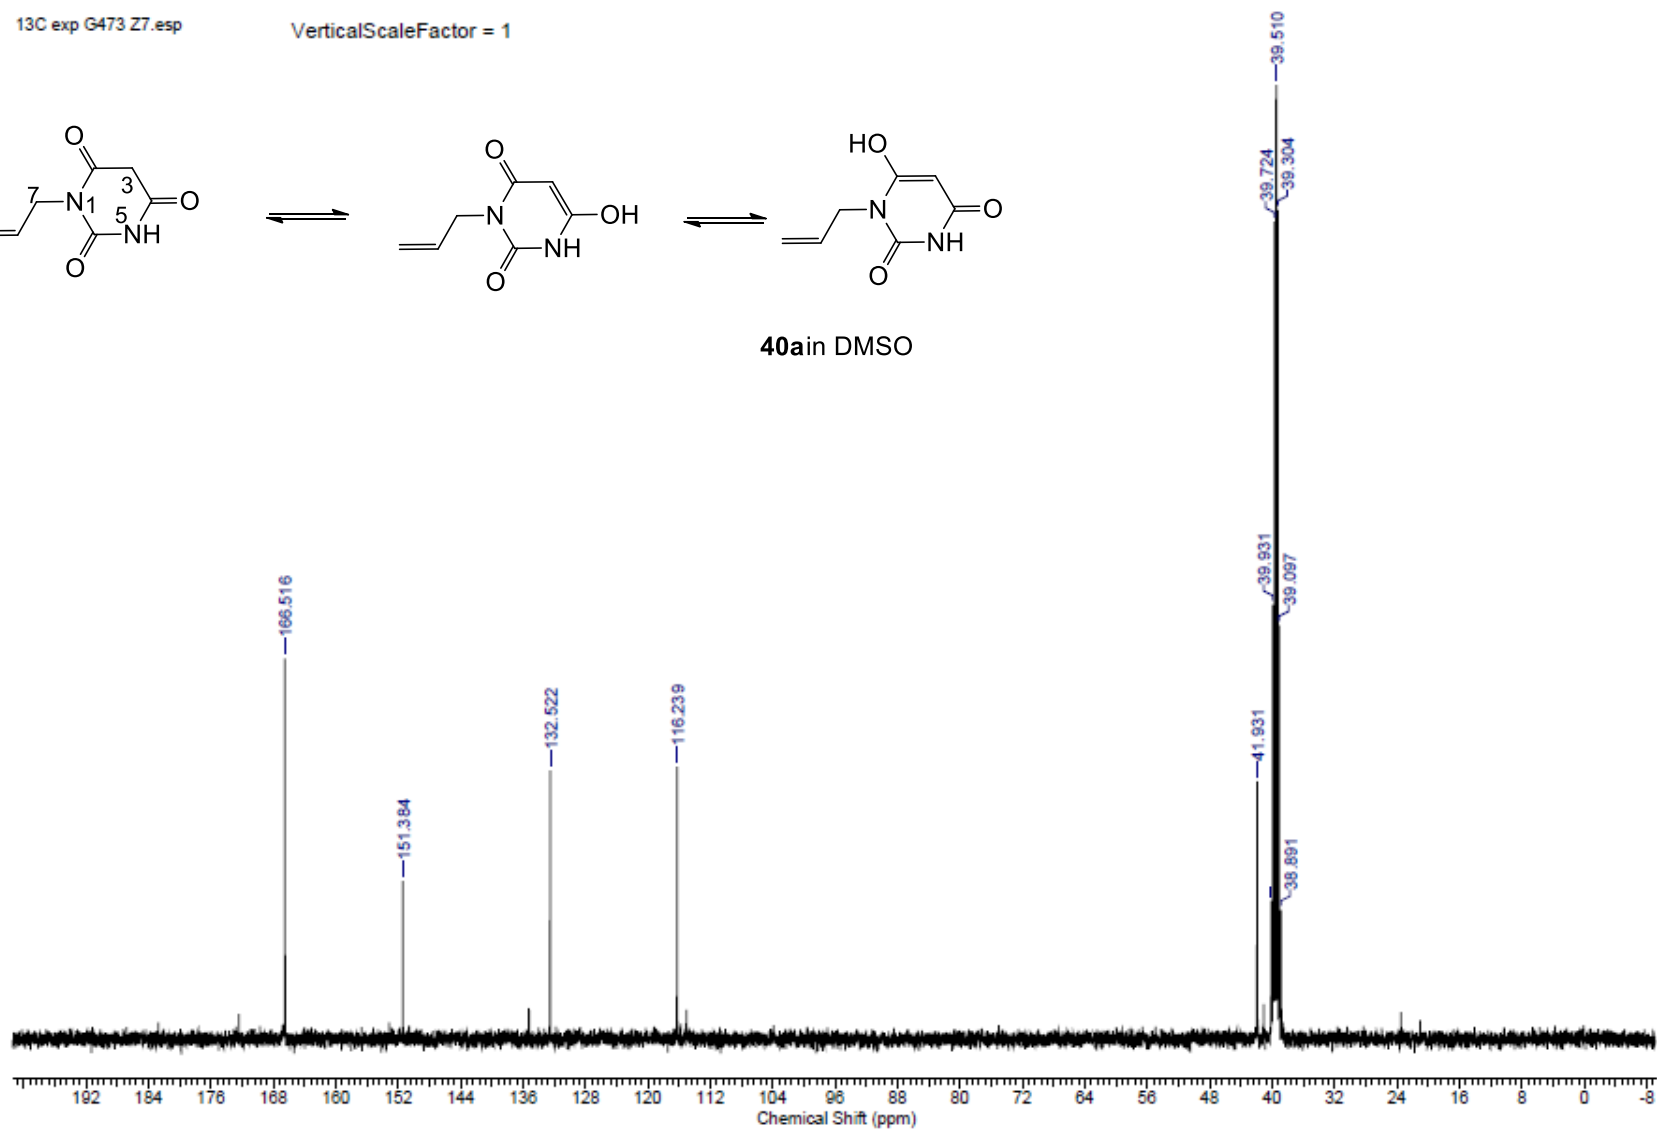

Apr30-2011-5.001.001.1r.esp

VerticalScaleFactor = 1

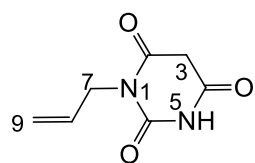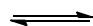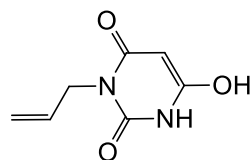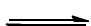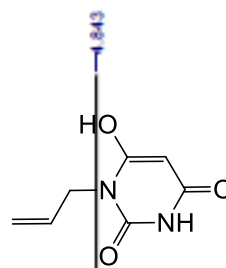

40a in MEOD

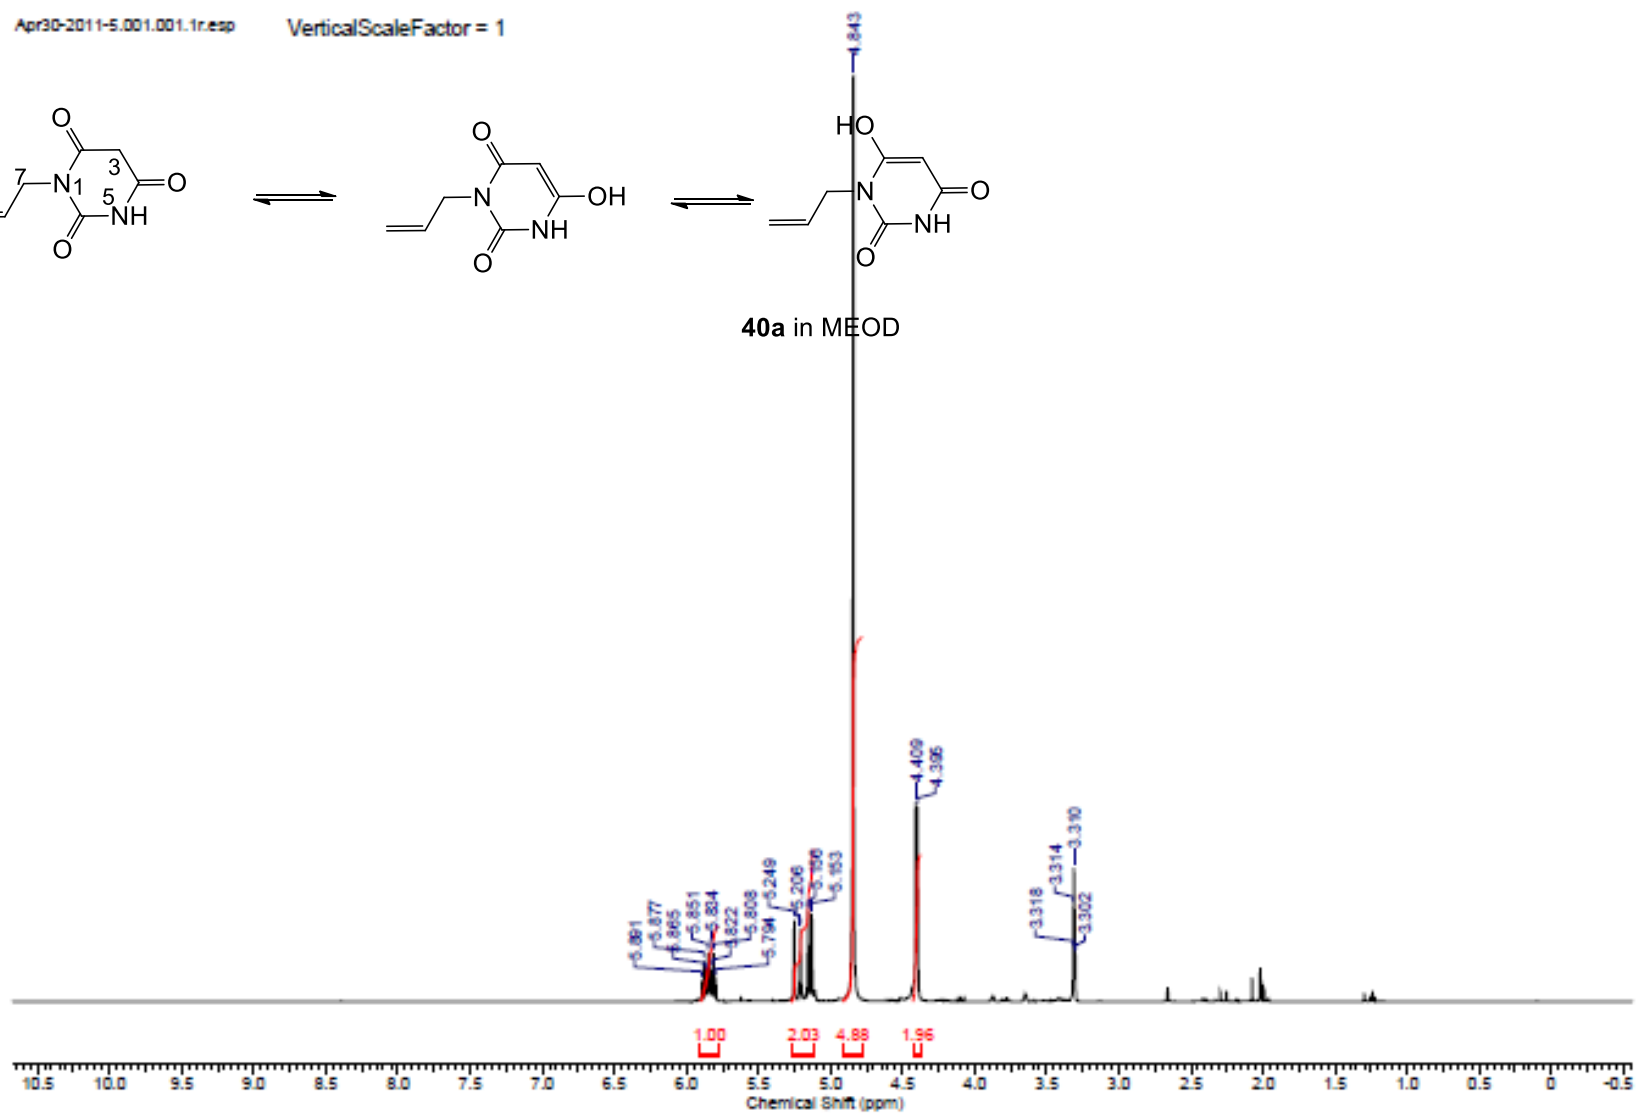

13C exp G473 Z7 MeOD.esp

VerticalScaleFactor = 1

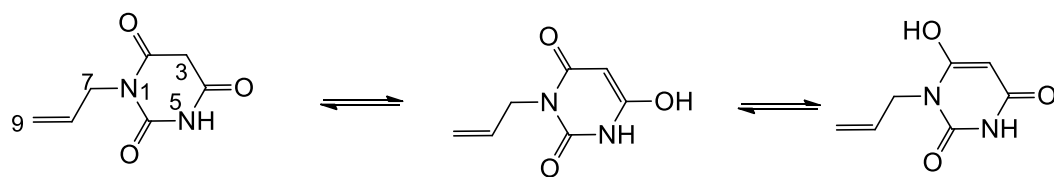

40a in MEOD

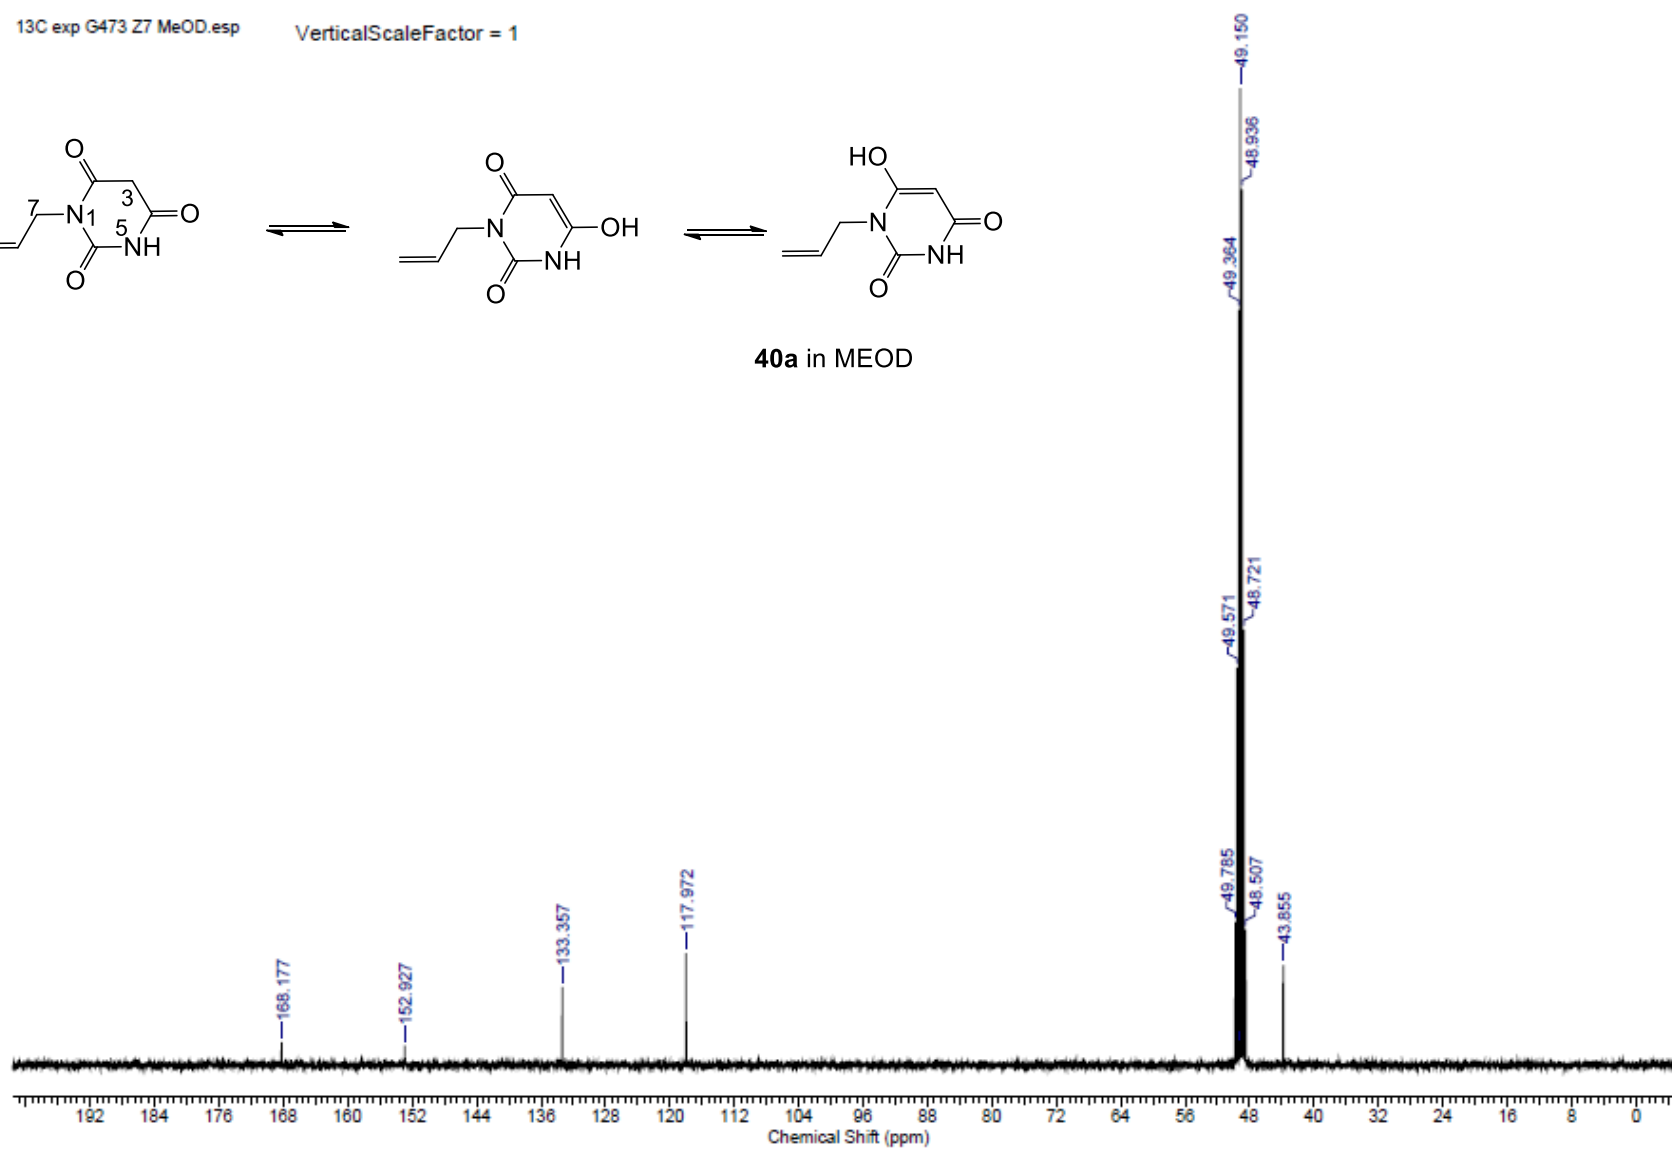

1H exp G527-2 Z8.esp

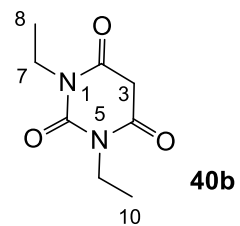

40b

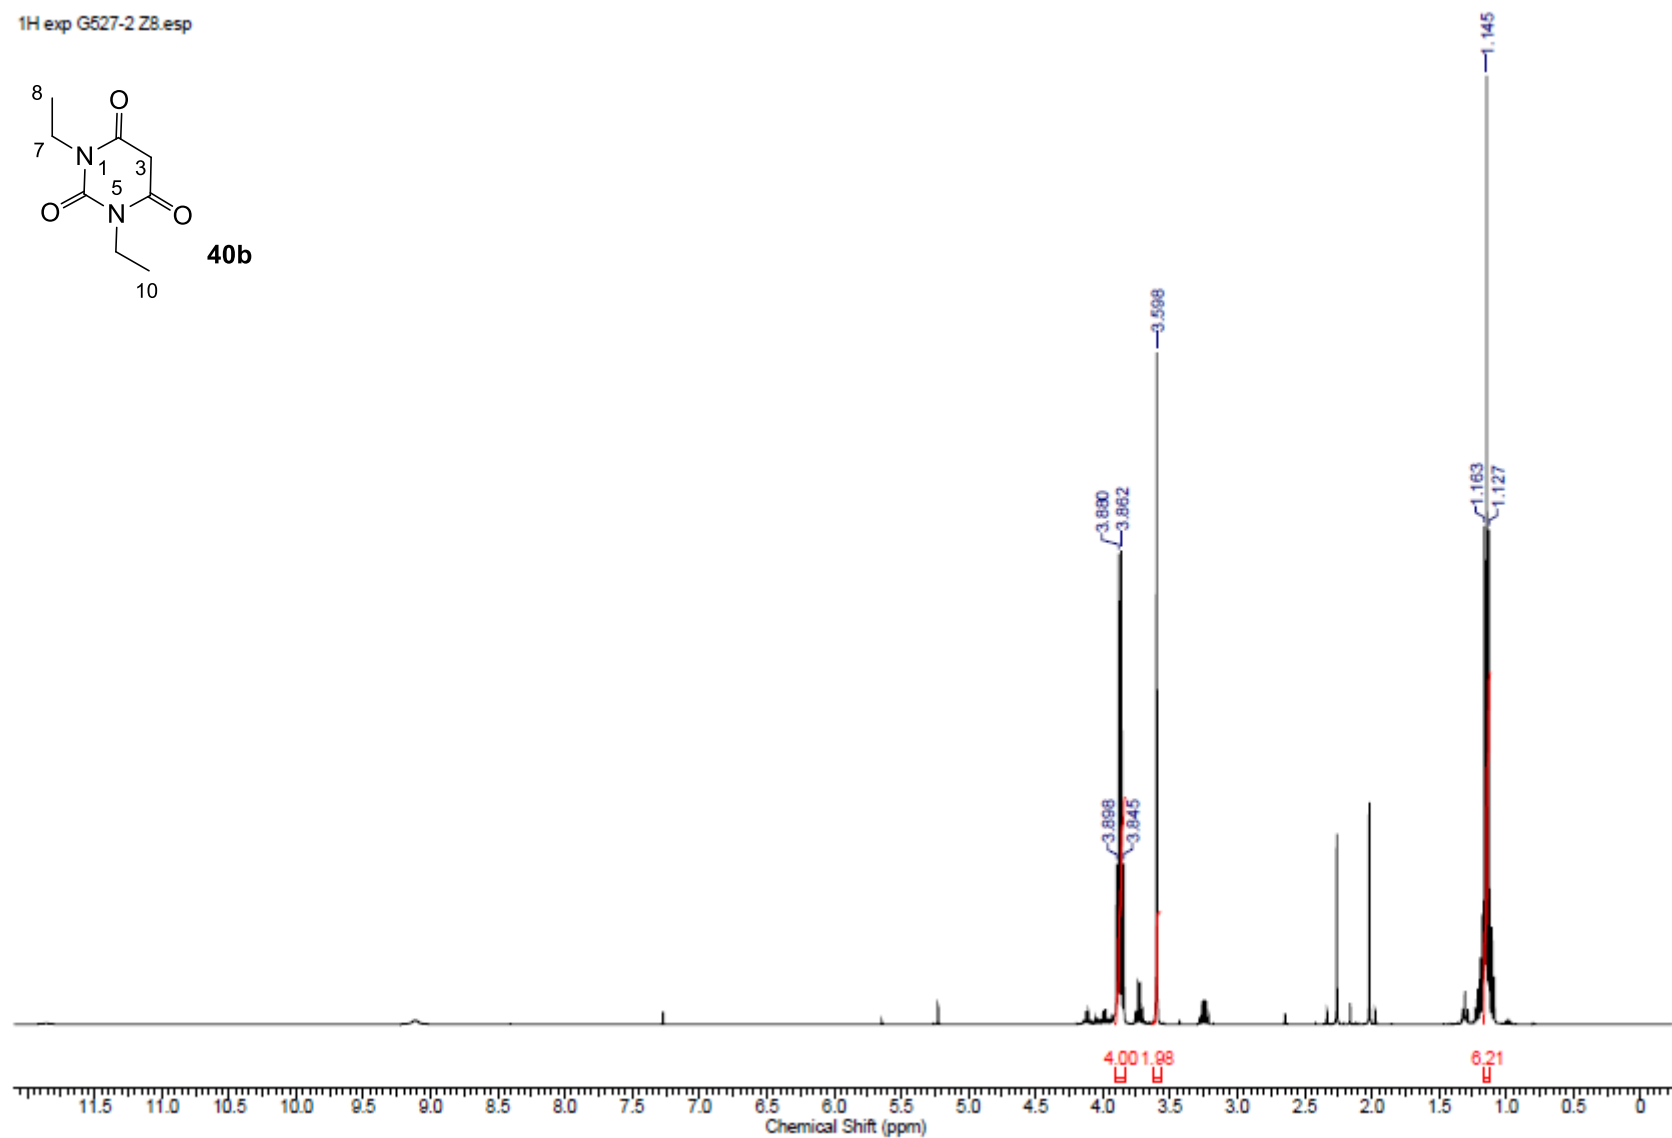

13C exp G527-2 Z8.esp

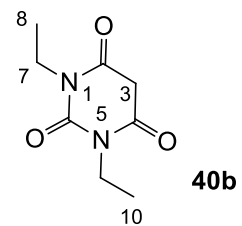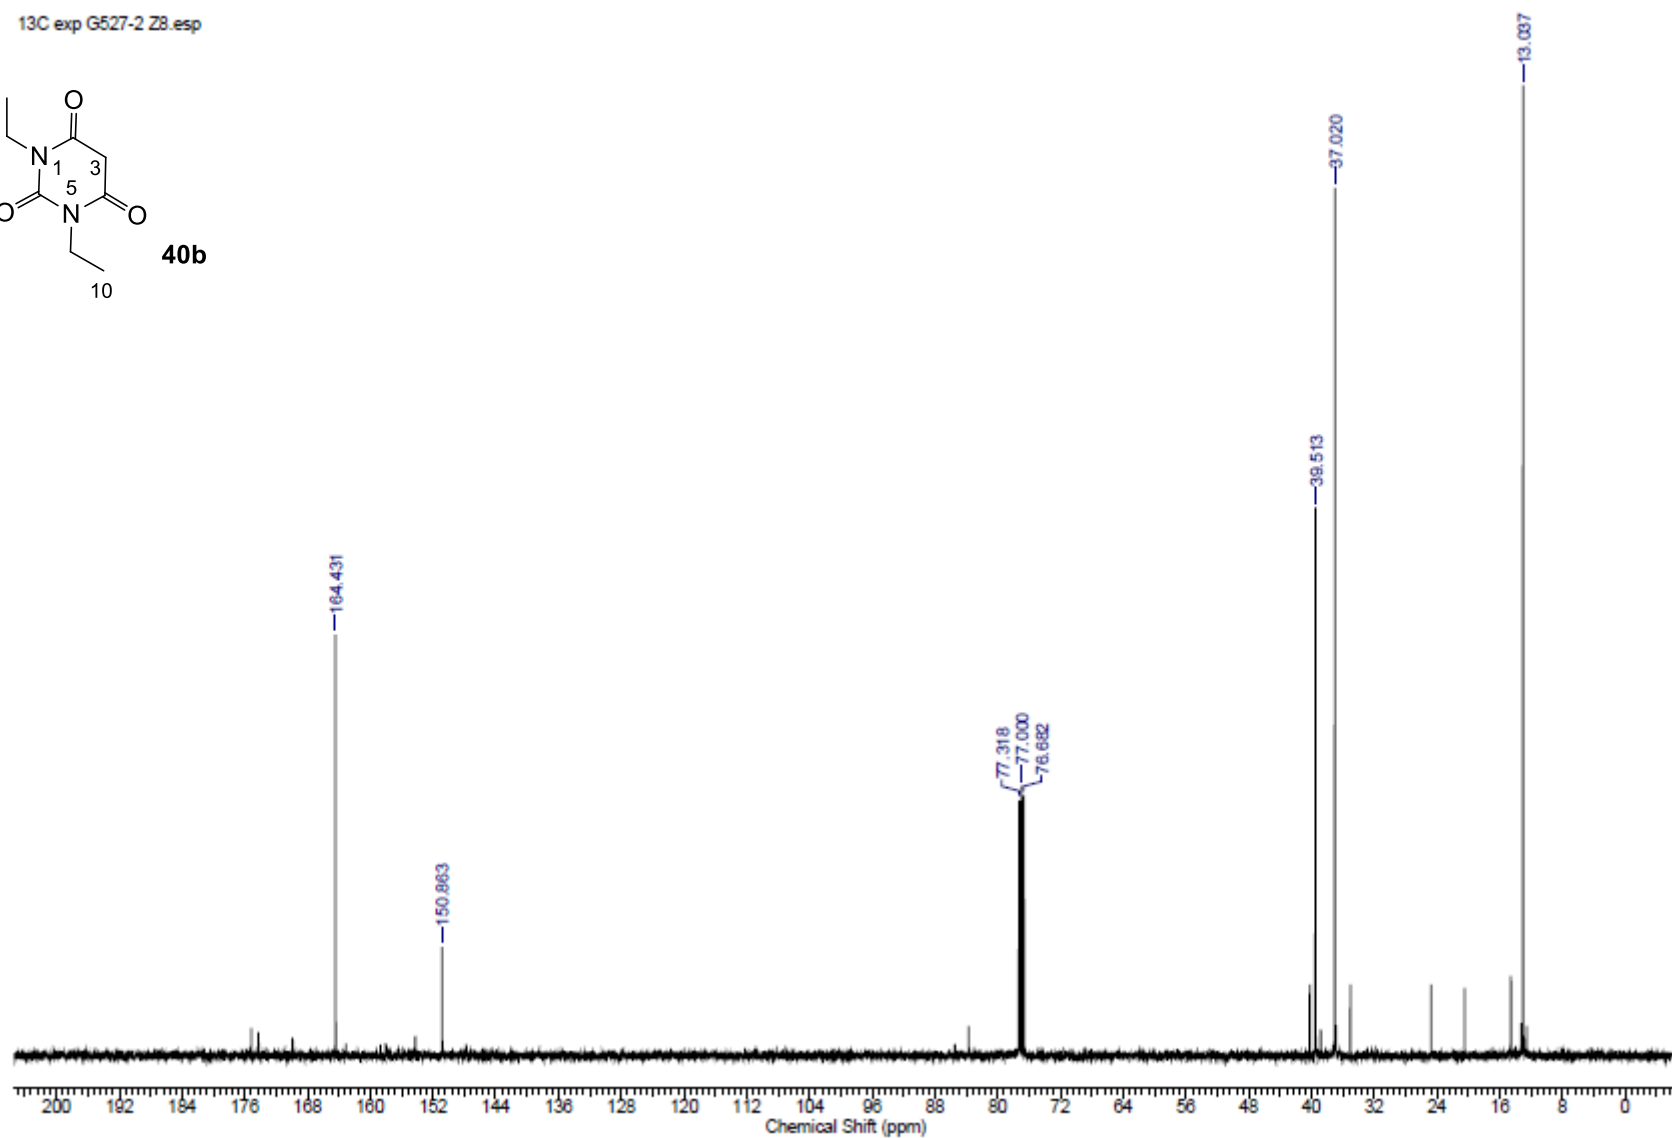



1H Z8-C1 exp G527-1.esp

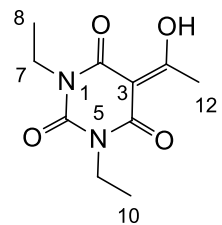

2b

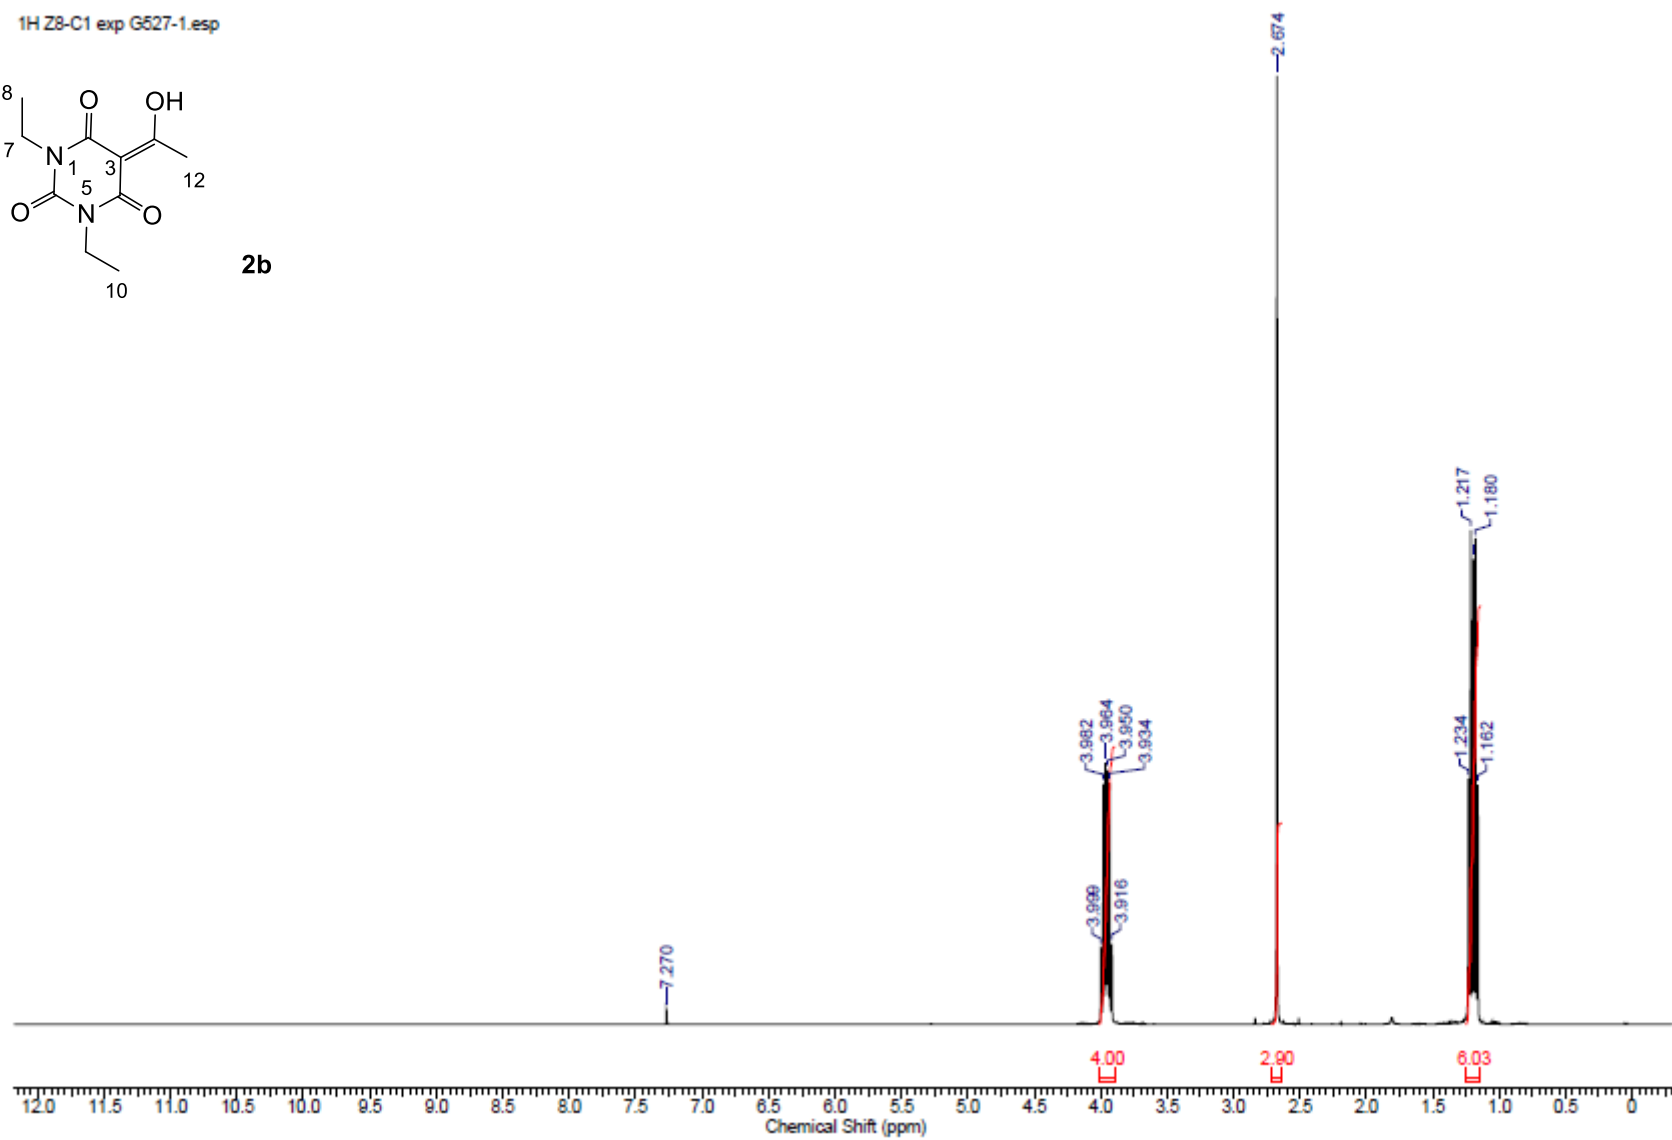

13C Z8-C1 exp G527-1.esp

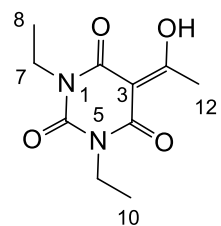

**2b**

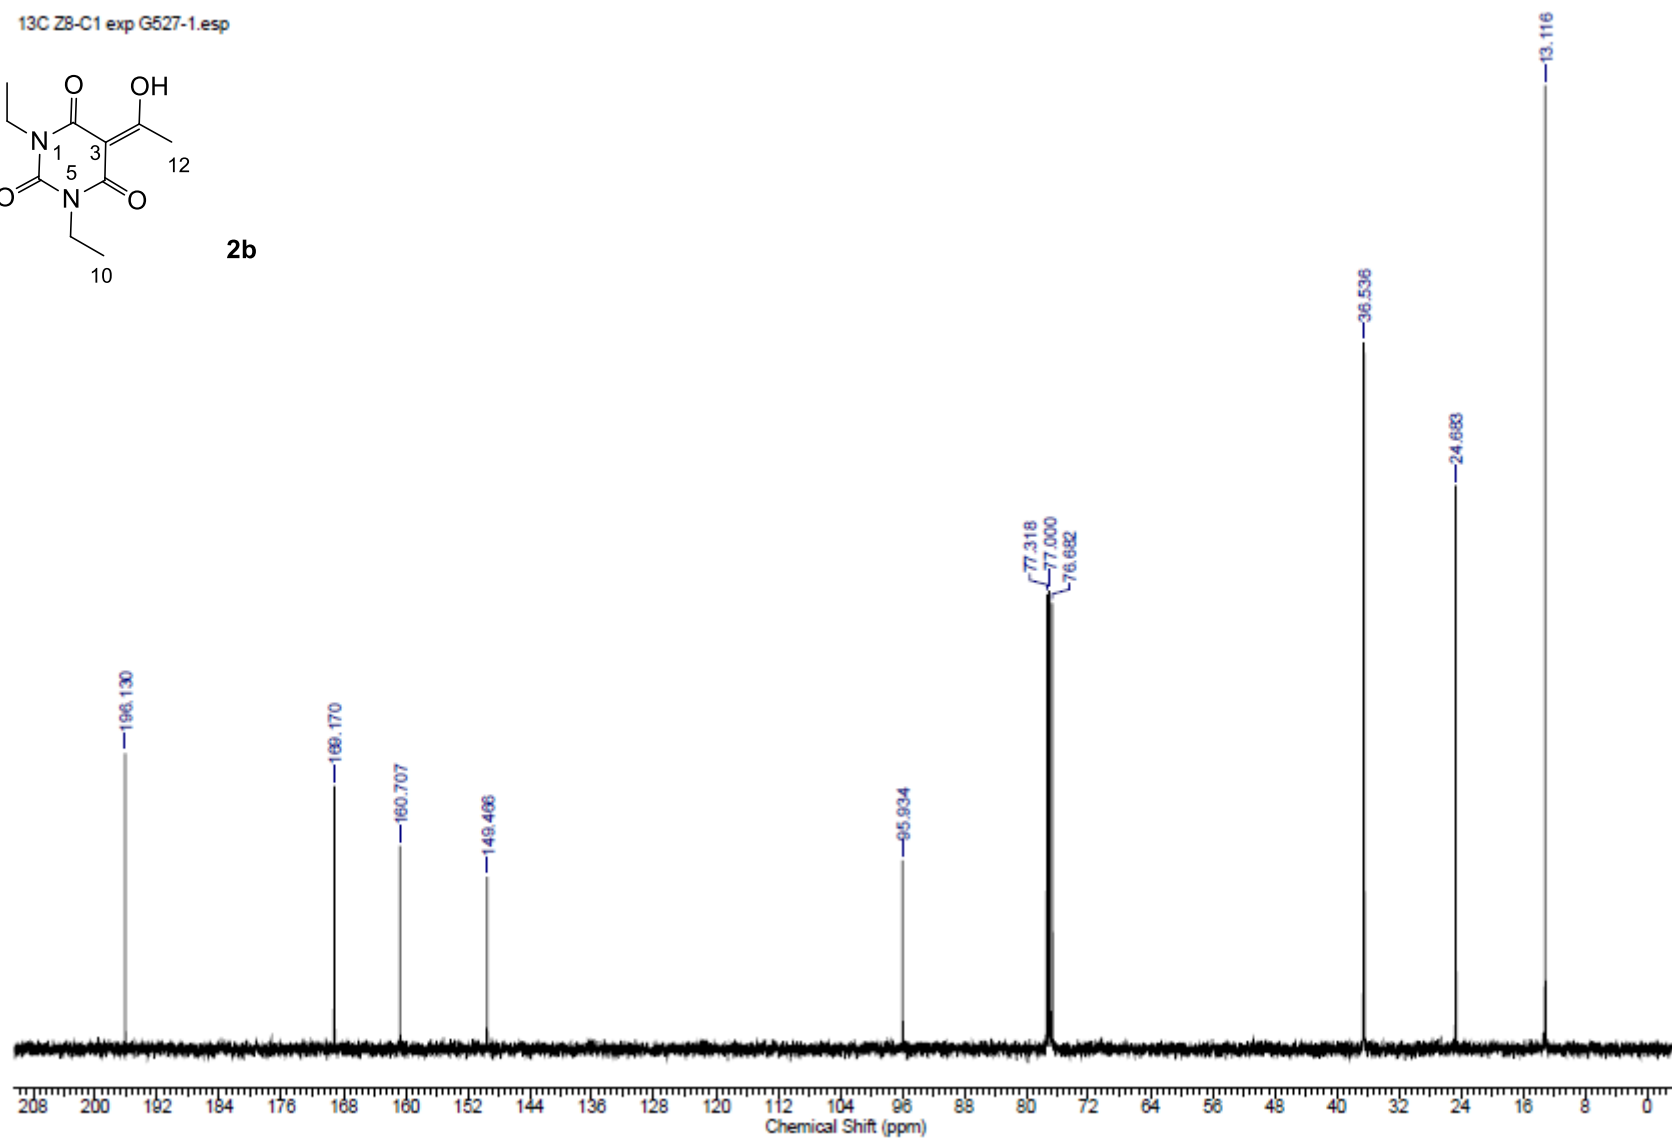

1H exp G586-2 Z9.esp

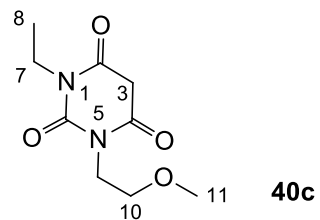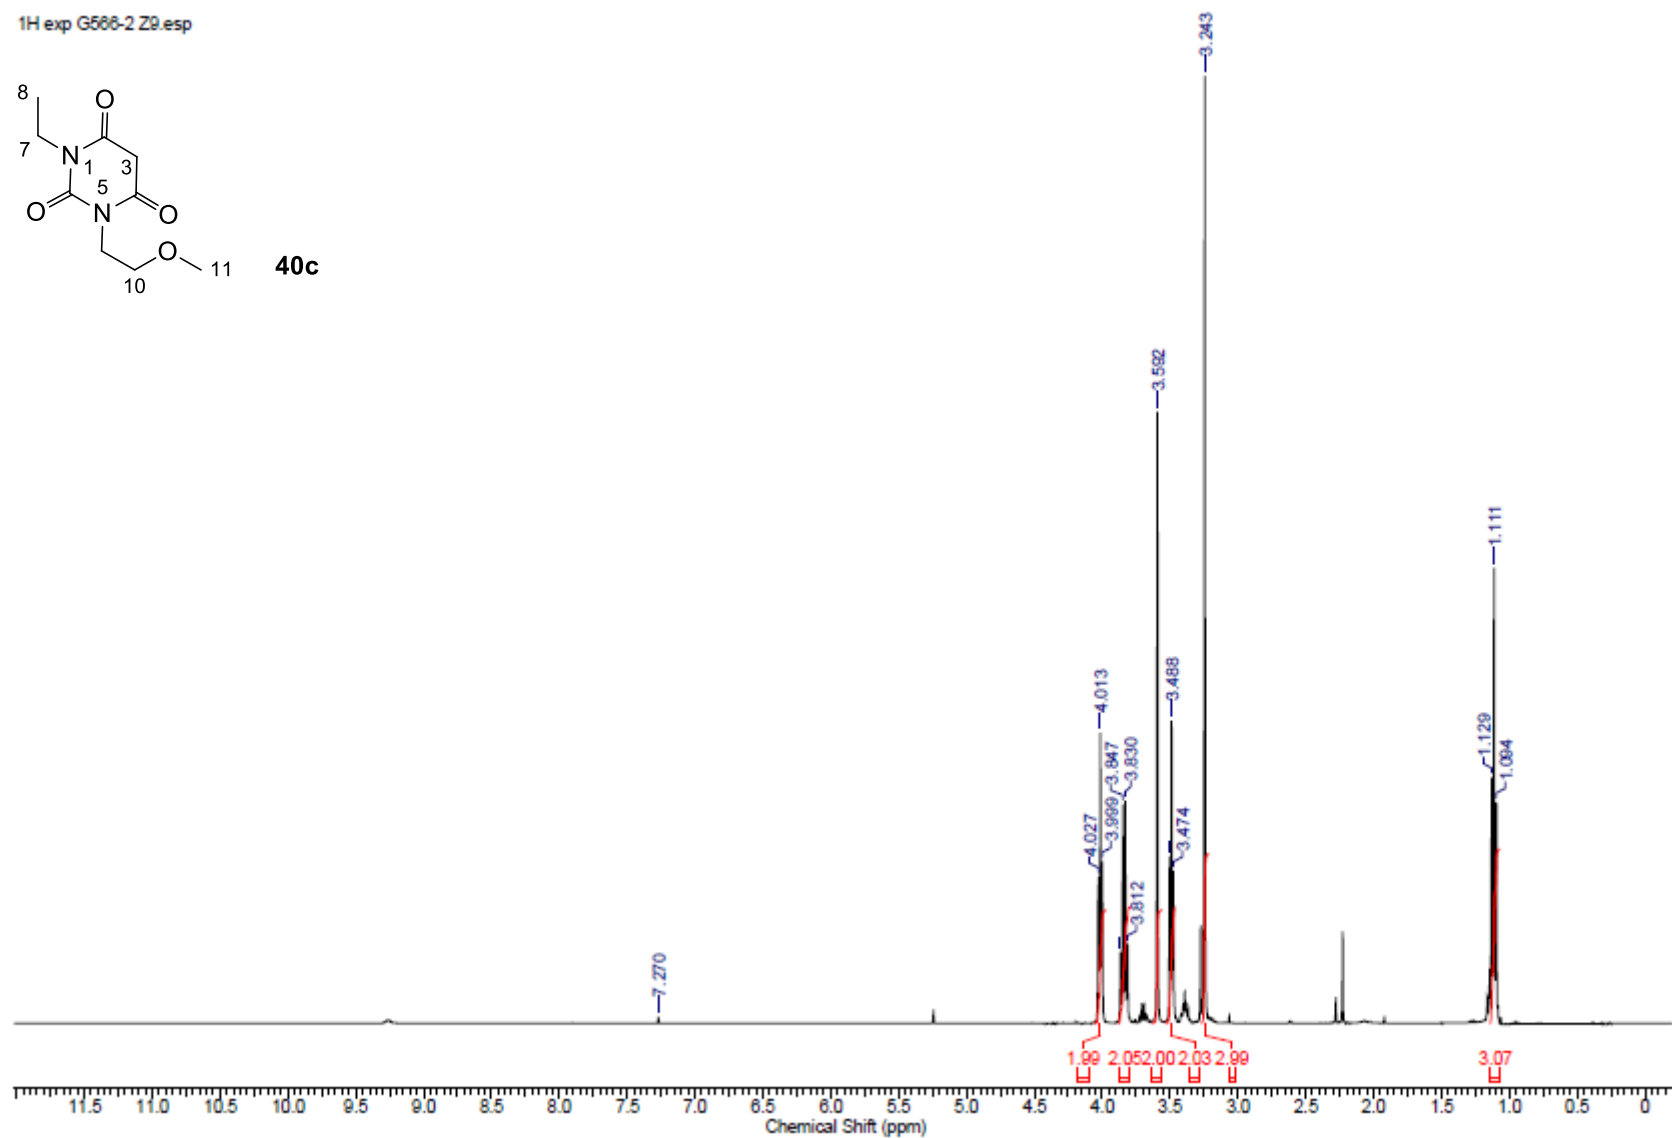

13C exp G566-2 Z9.esp

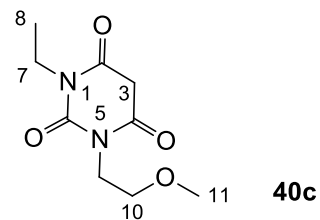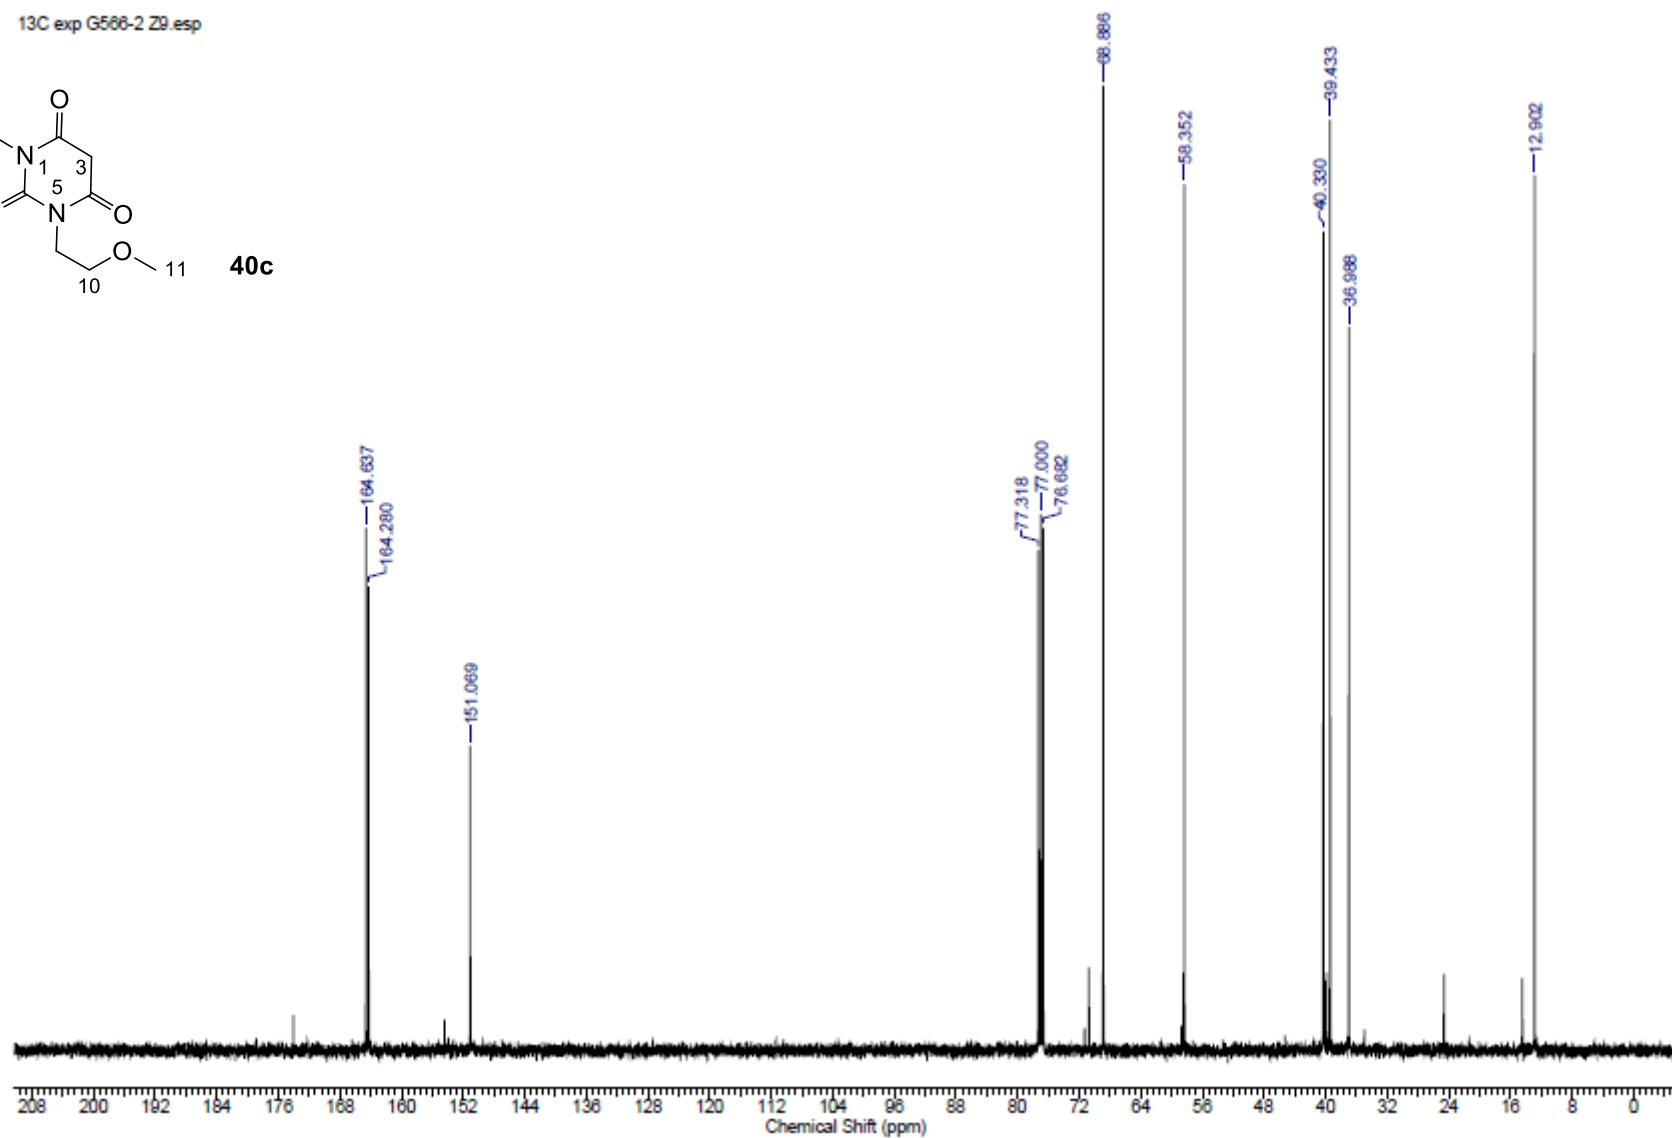

1H Z9-C1 exp G566-1.esp

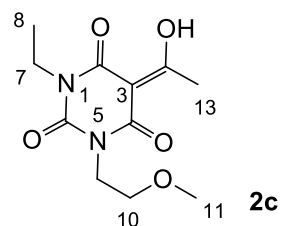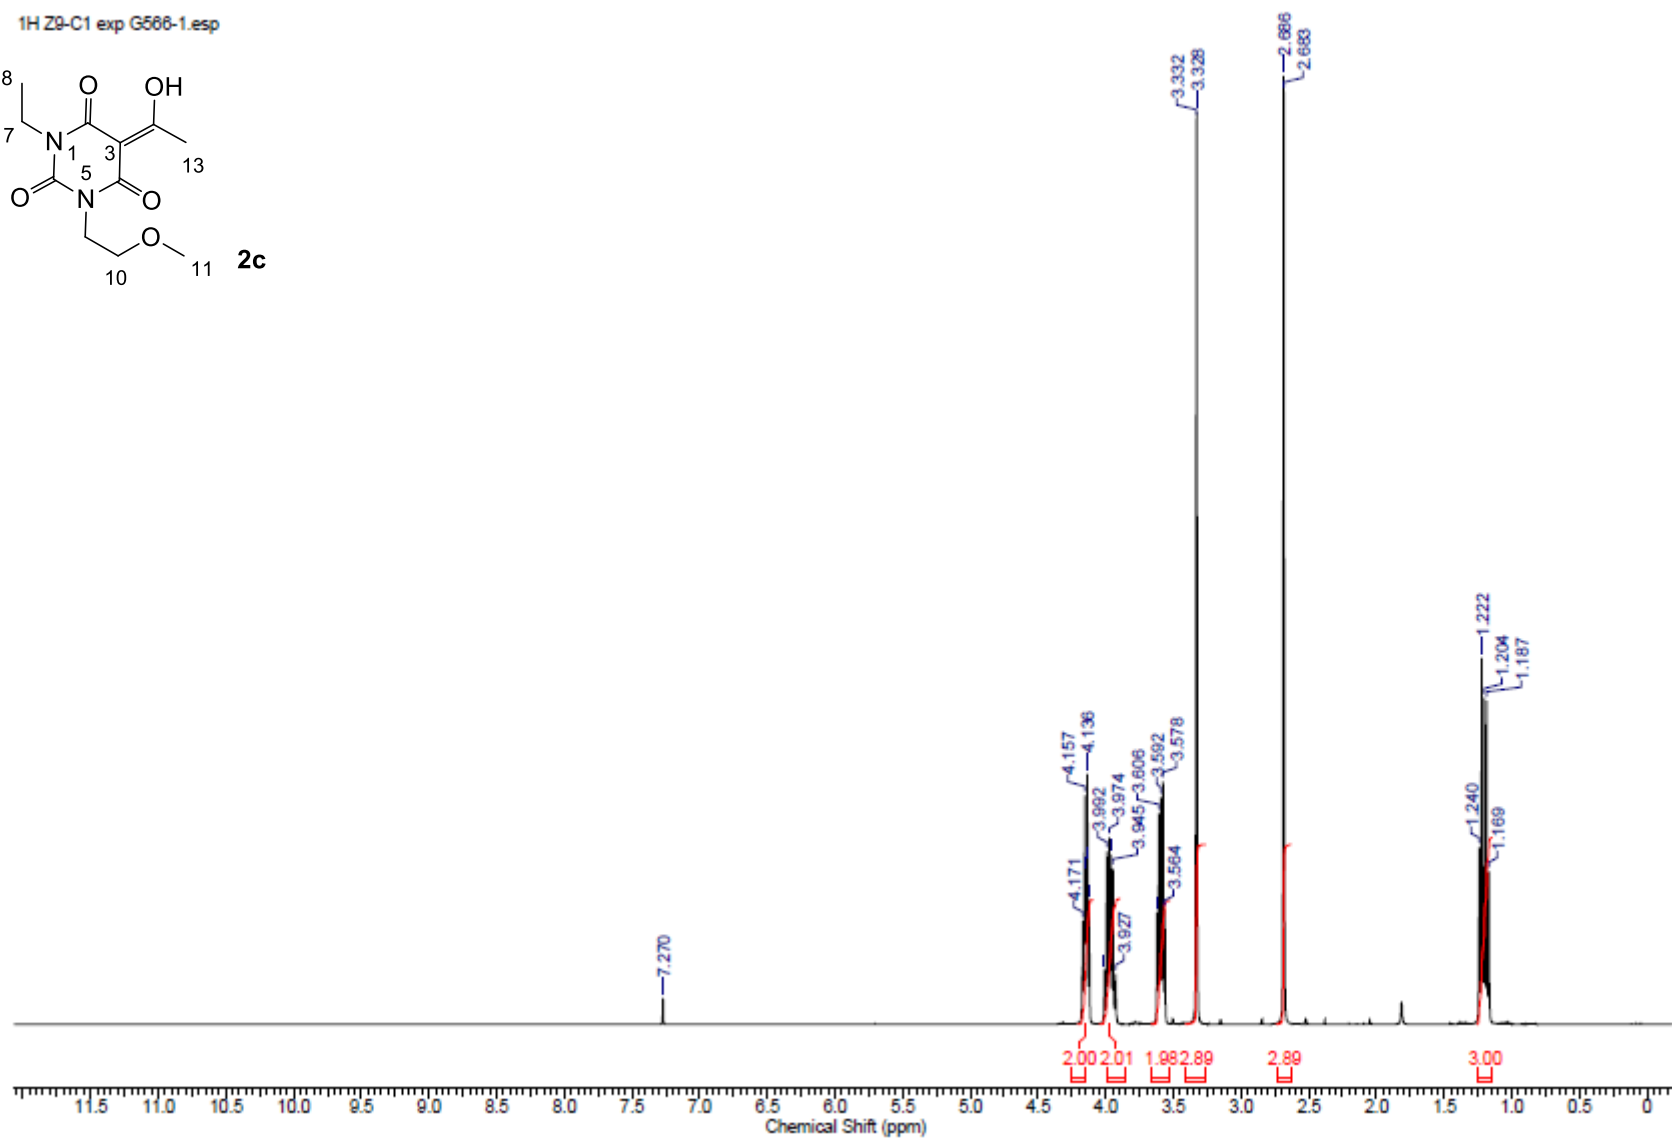

13C Z9-C1 exp G566-1.esp

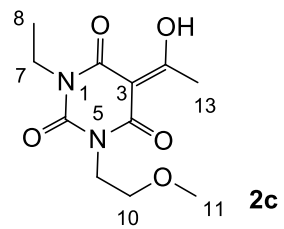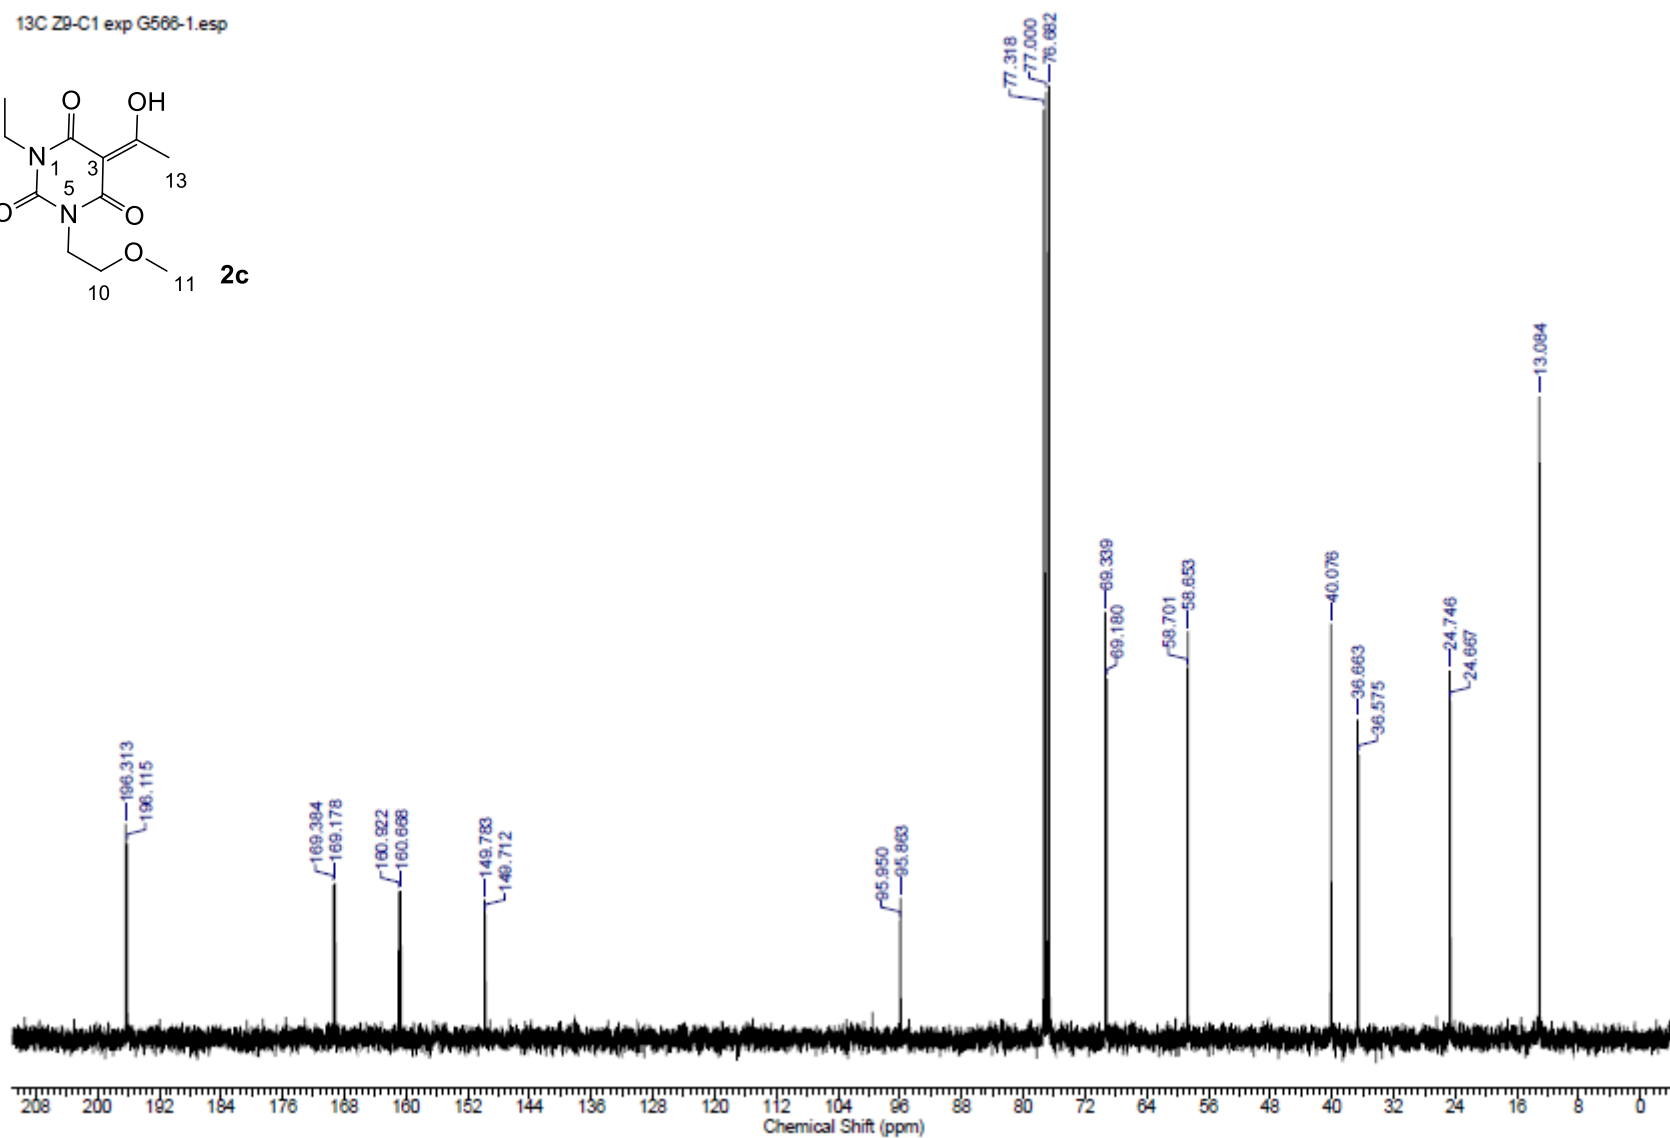

1h exp G571 Z804.esp

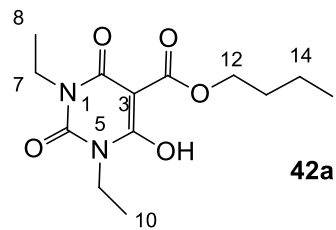

42a

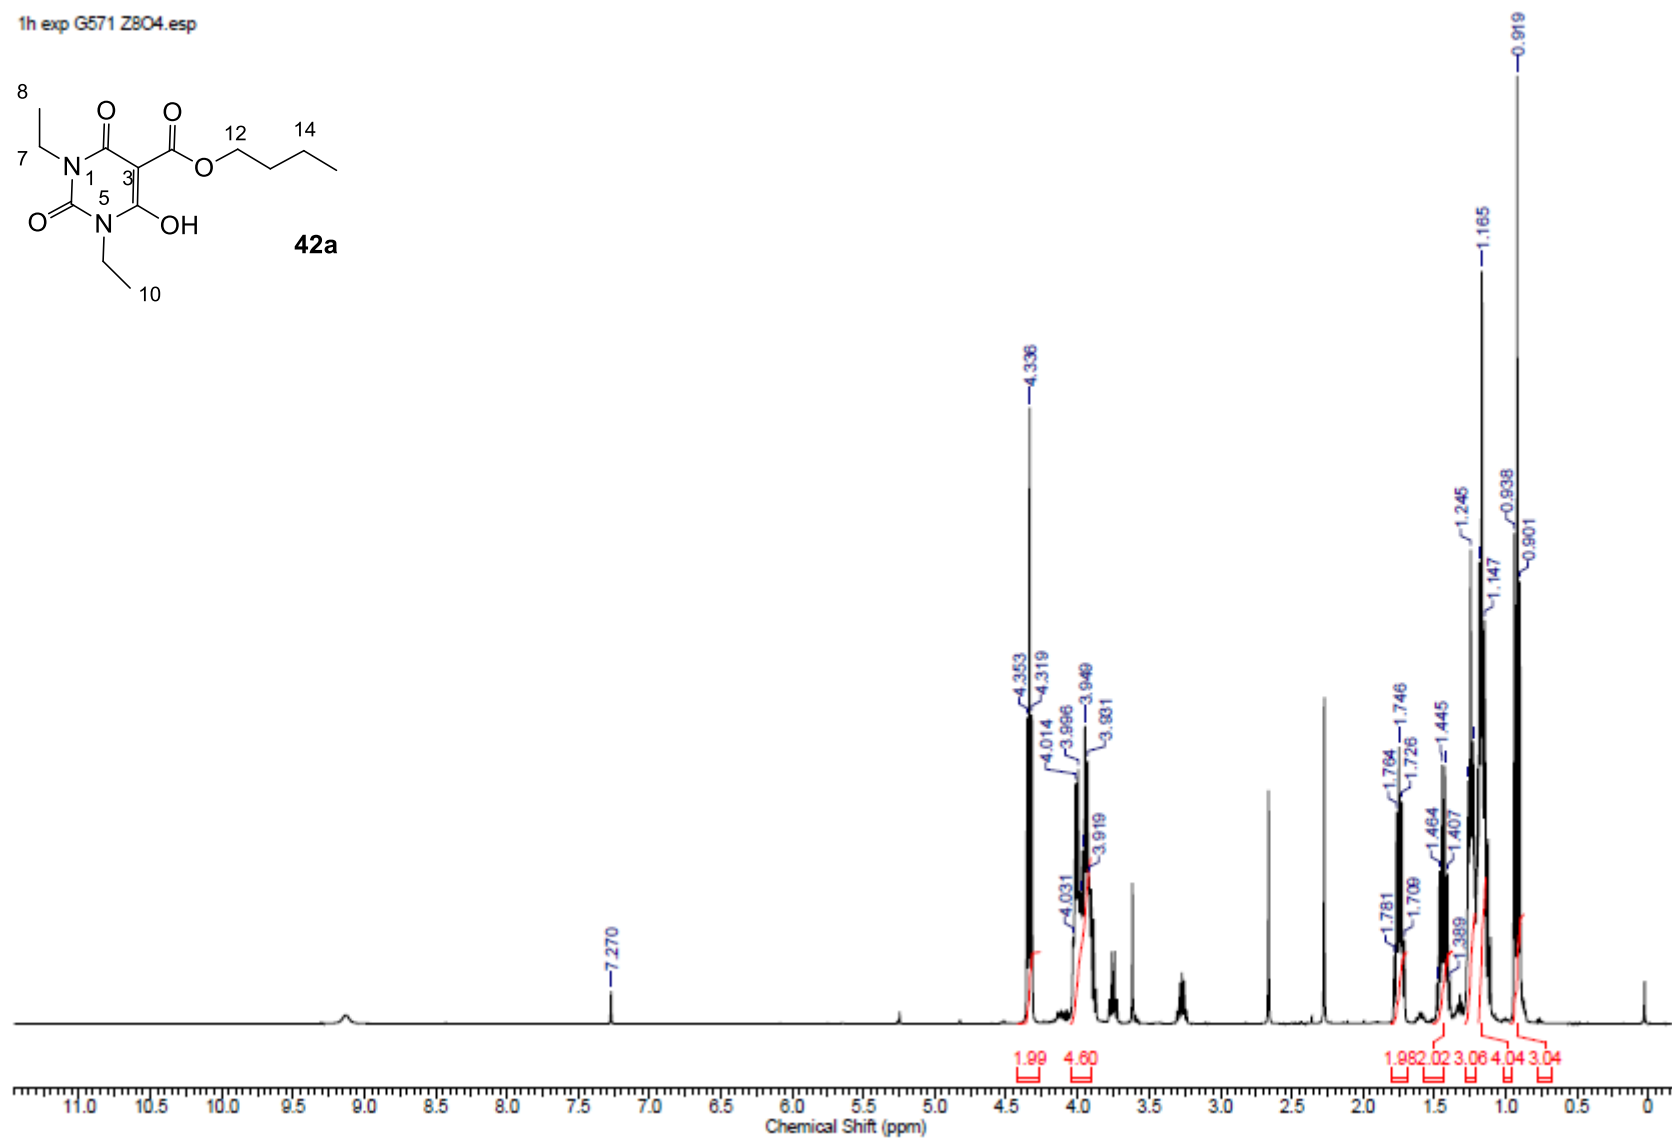

13c exp G571 Z8O4.esp

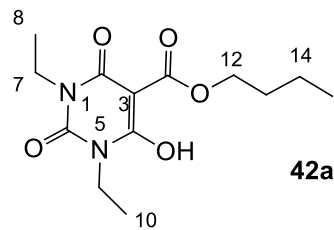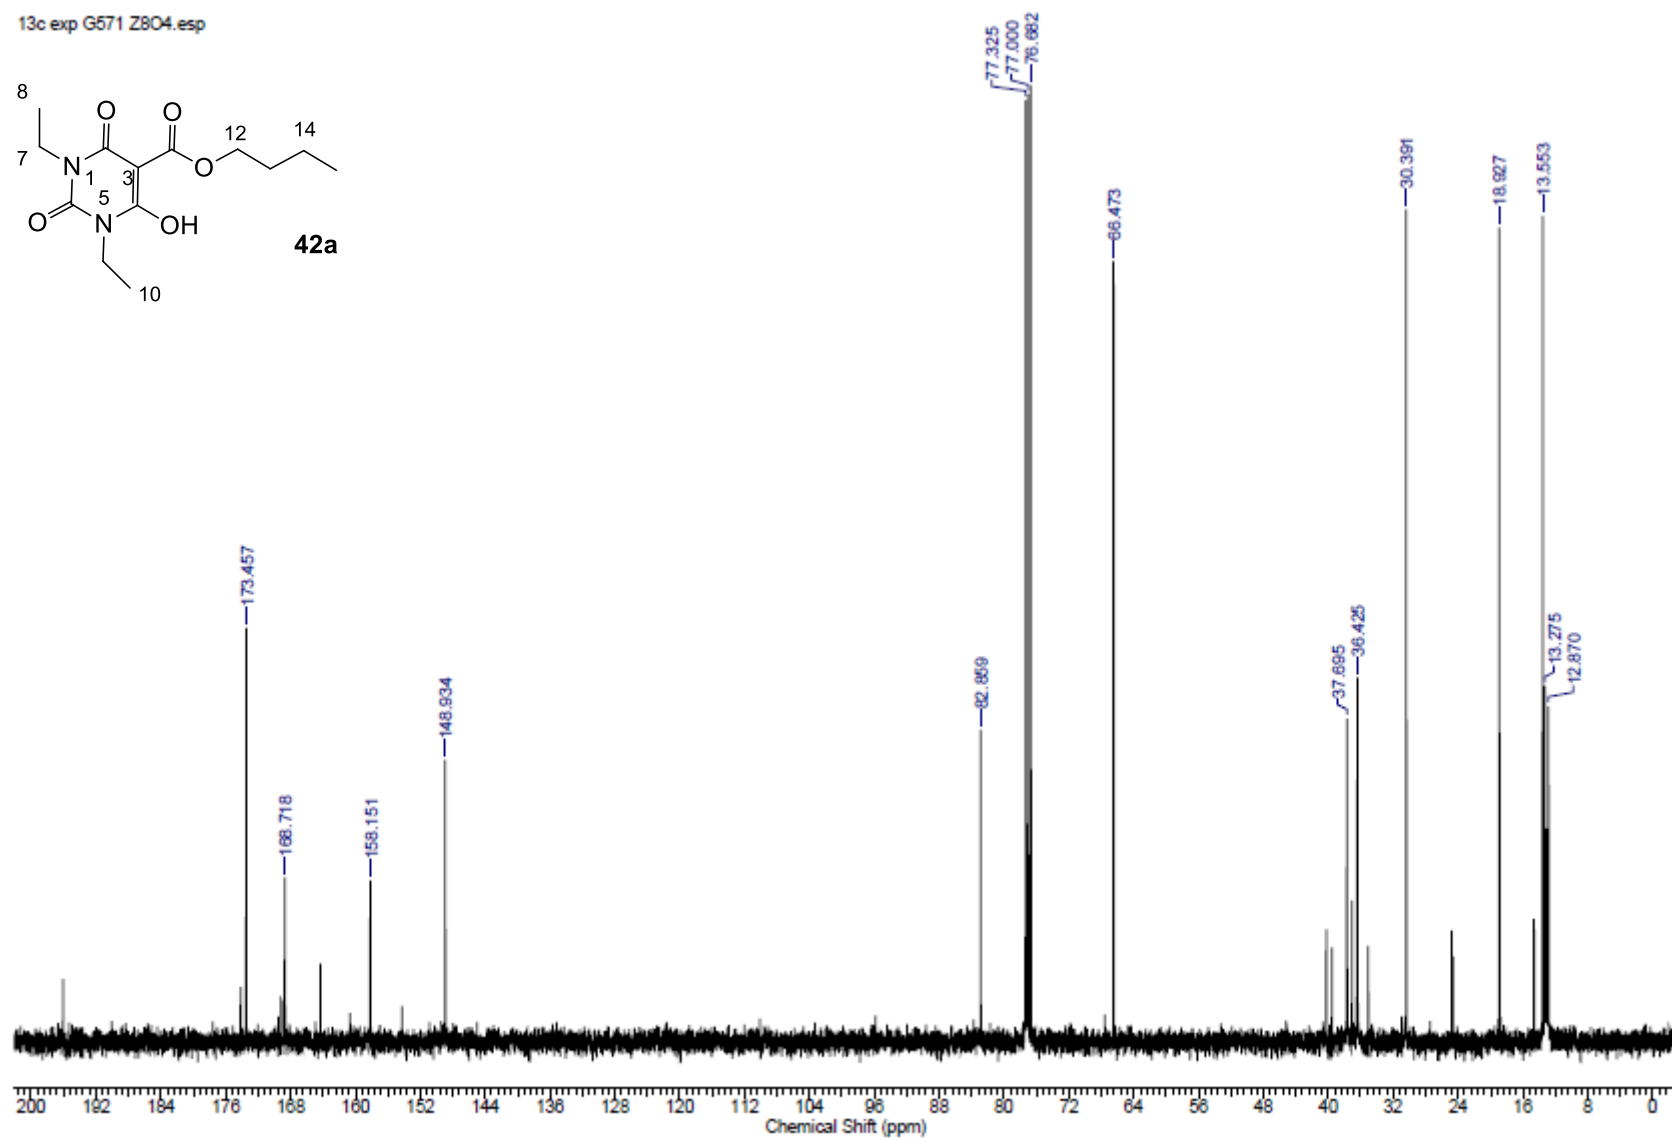



1H exp G573 Z904.esp

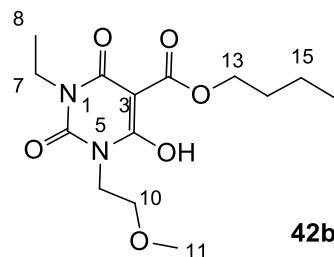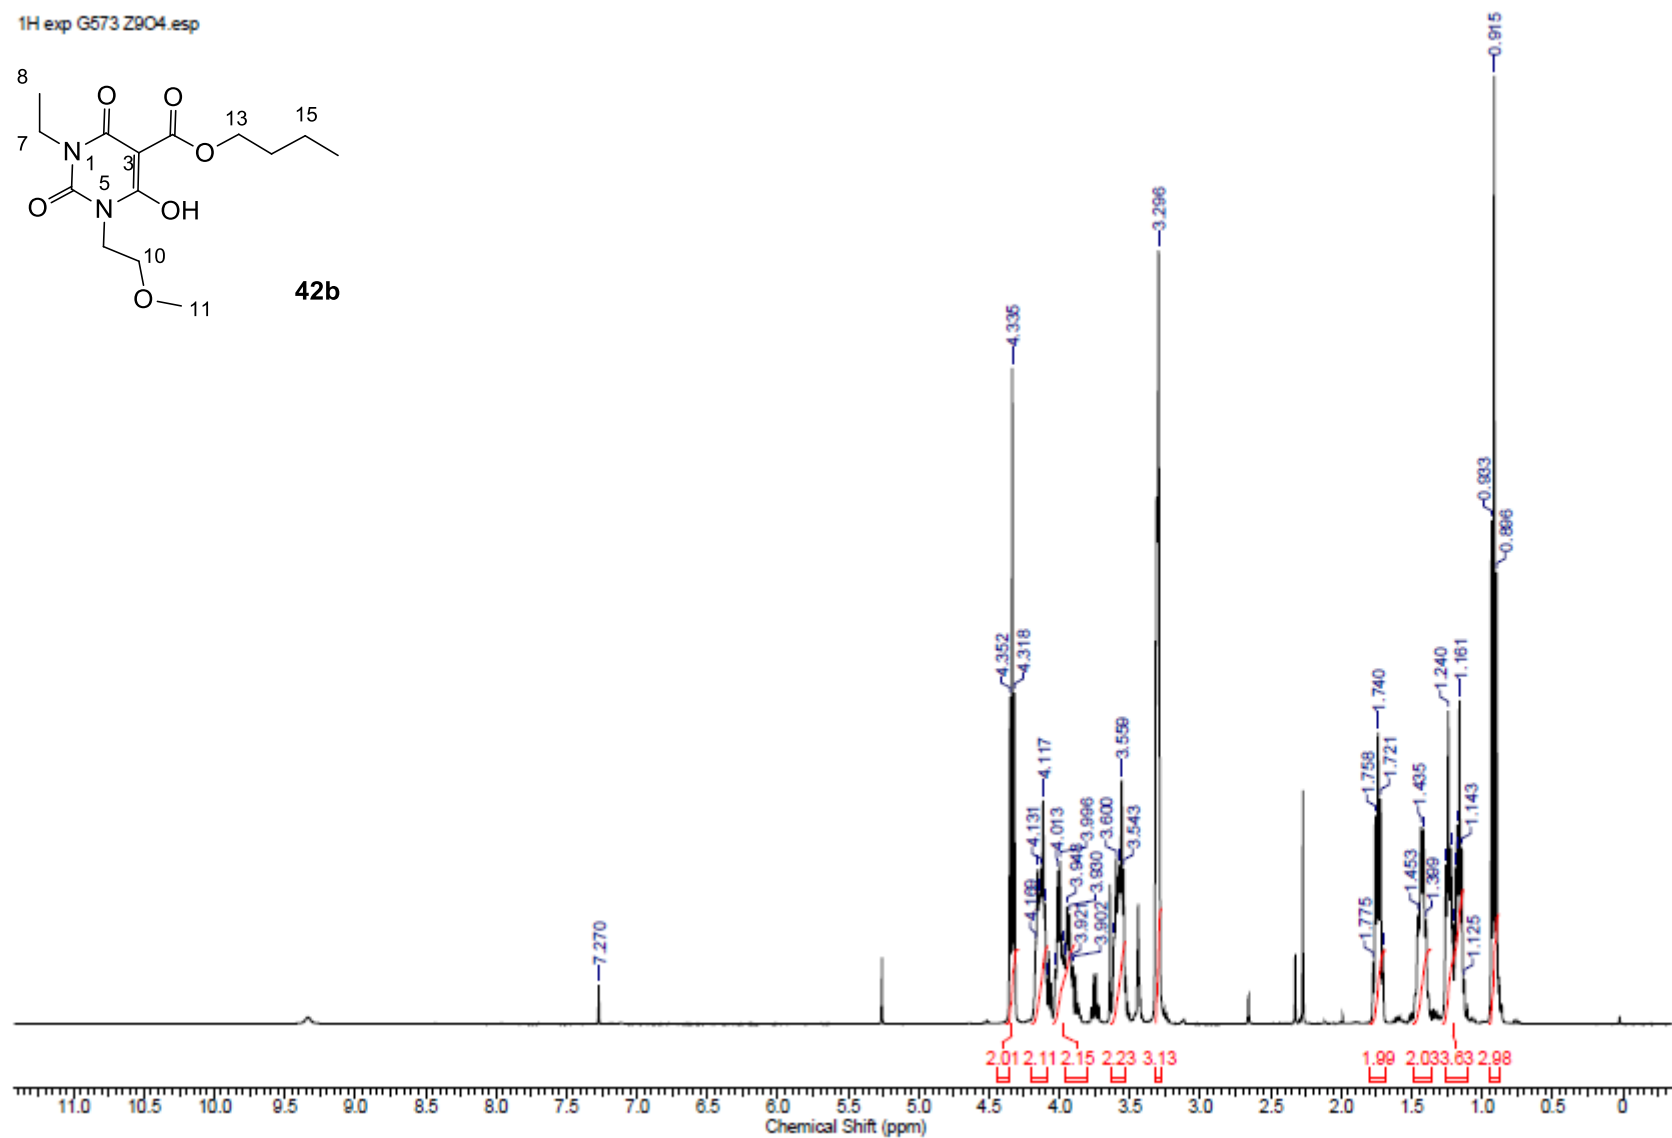

13c exp G573 Z9O4.esp

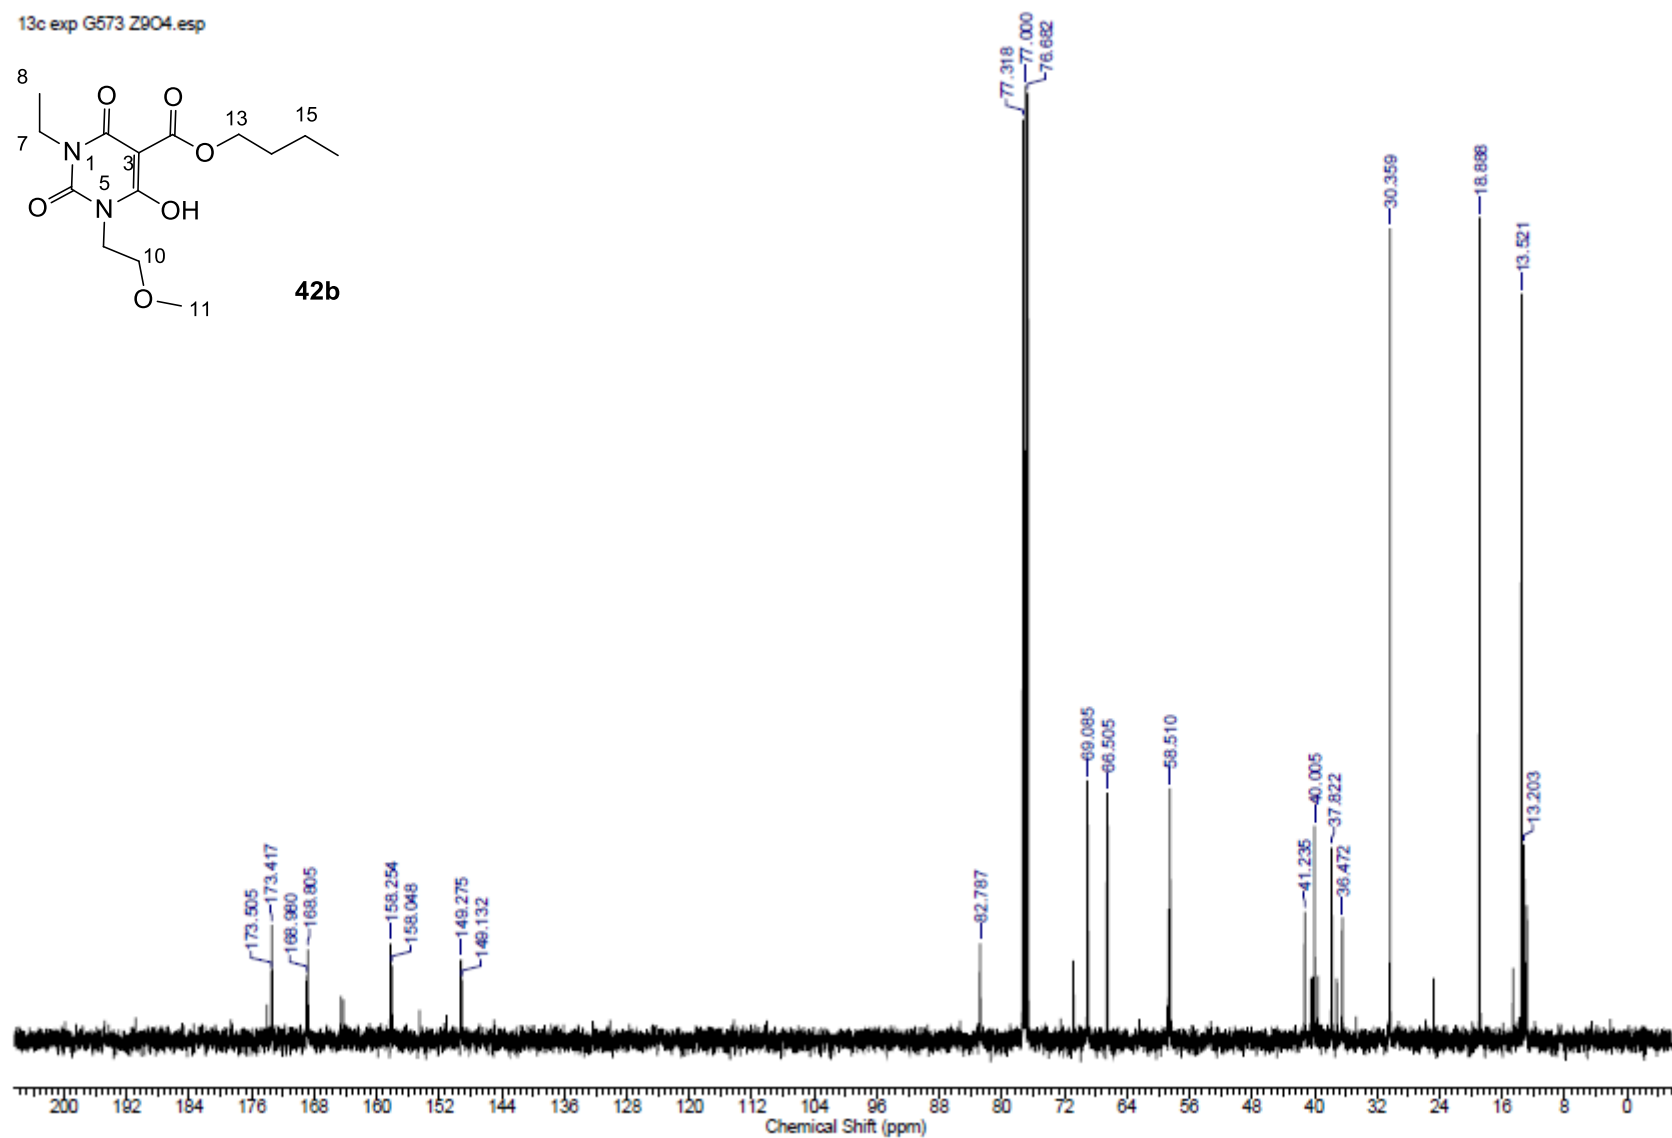

1H Z304 exp G524 500.esp

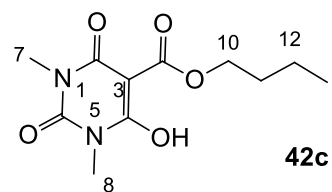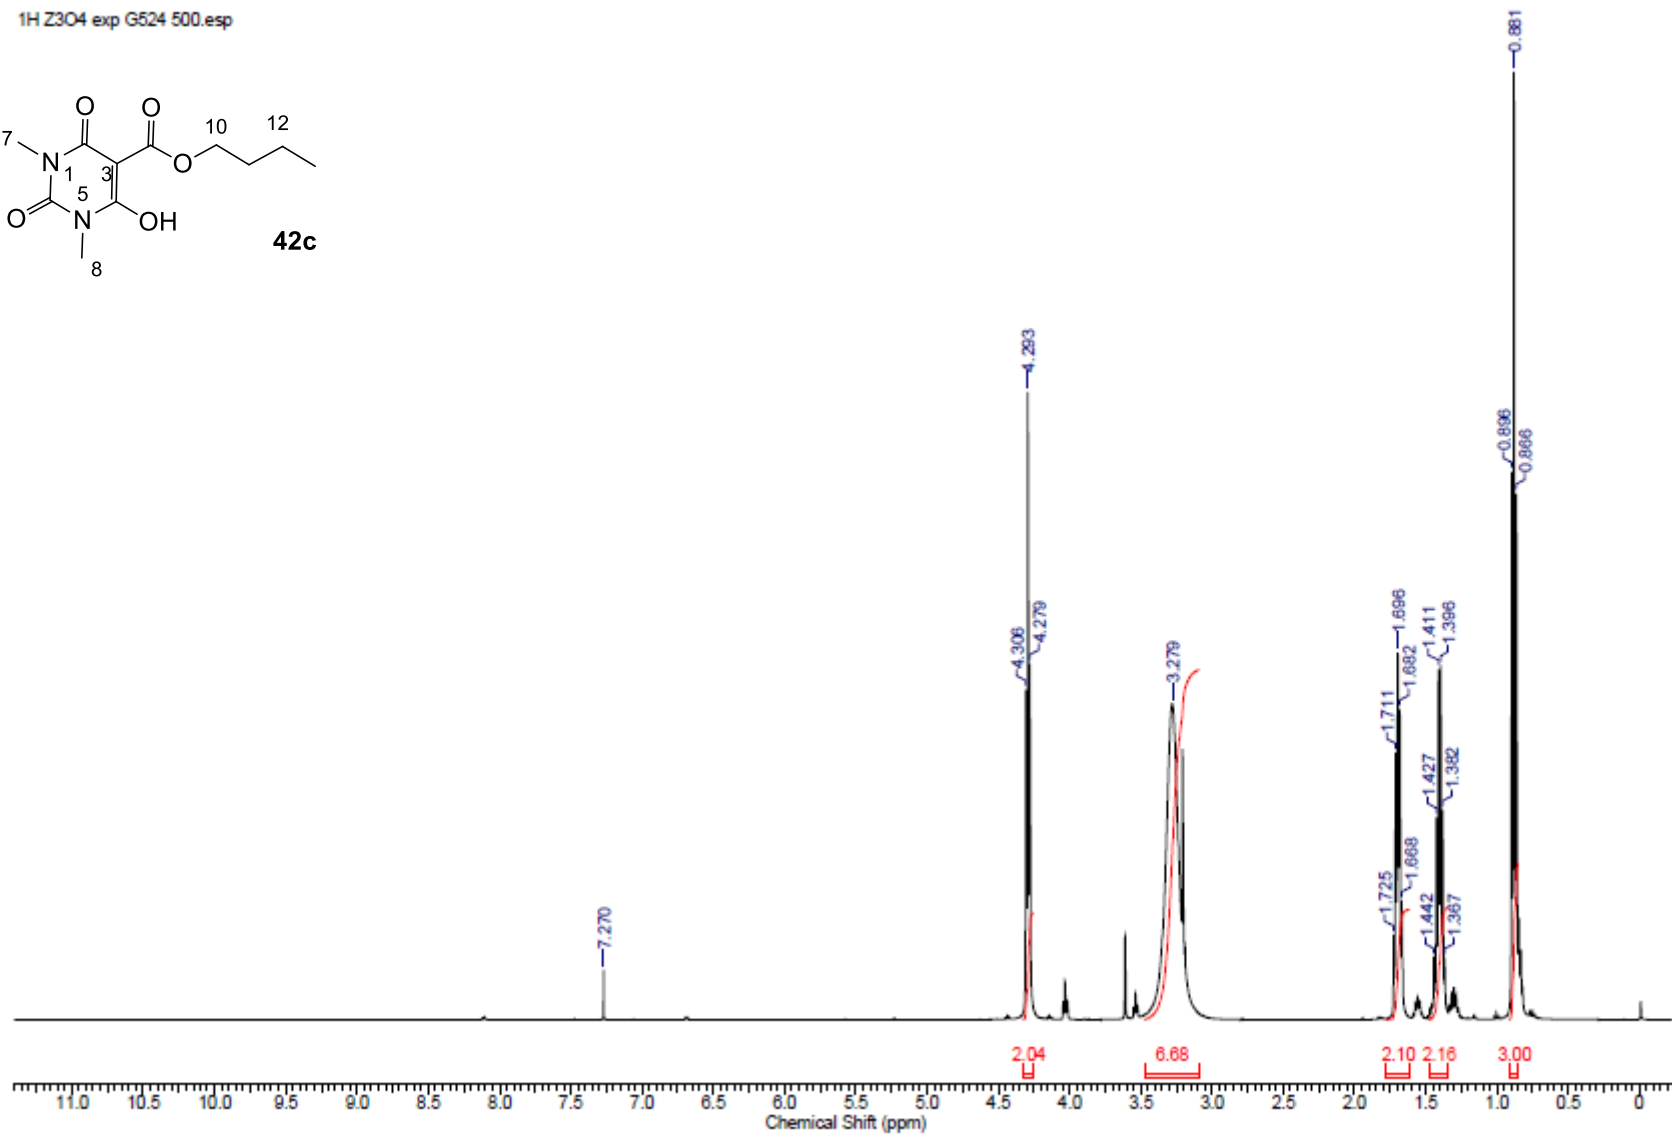

13C Z304 exp G524 500.esp

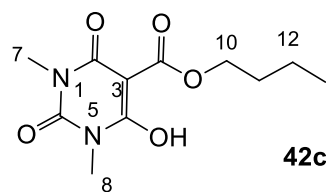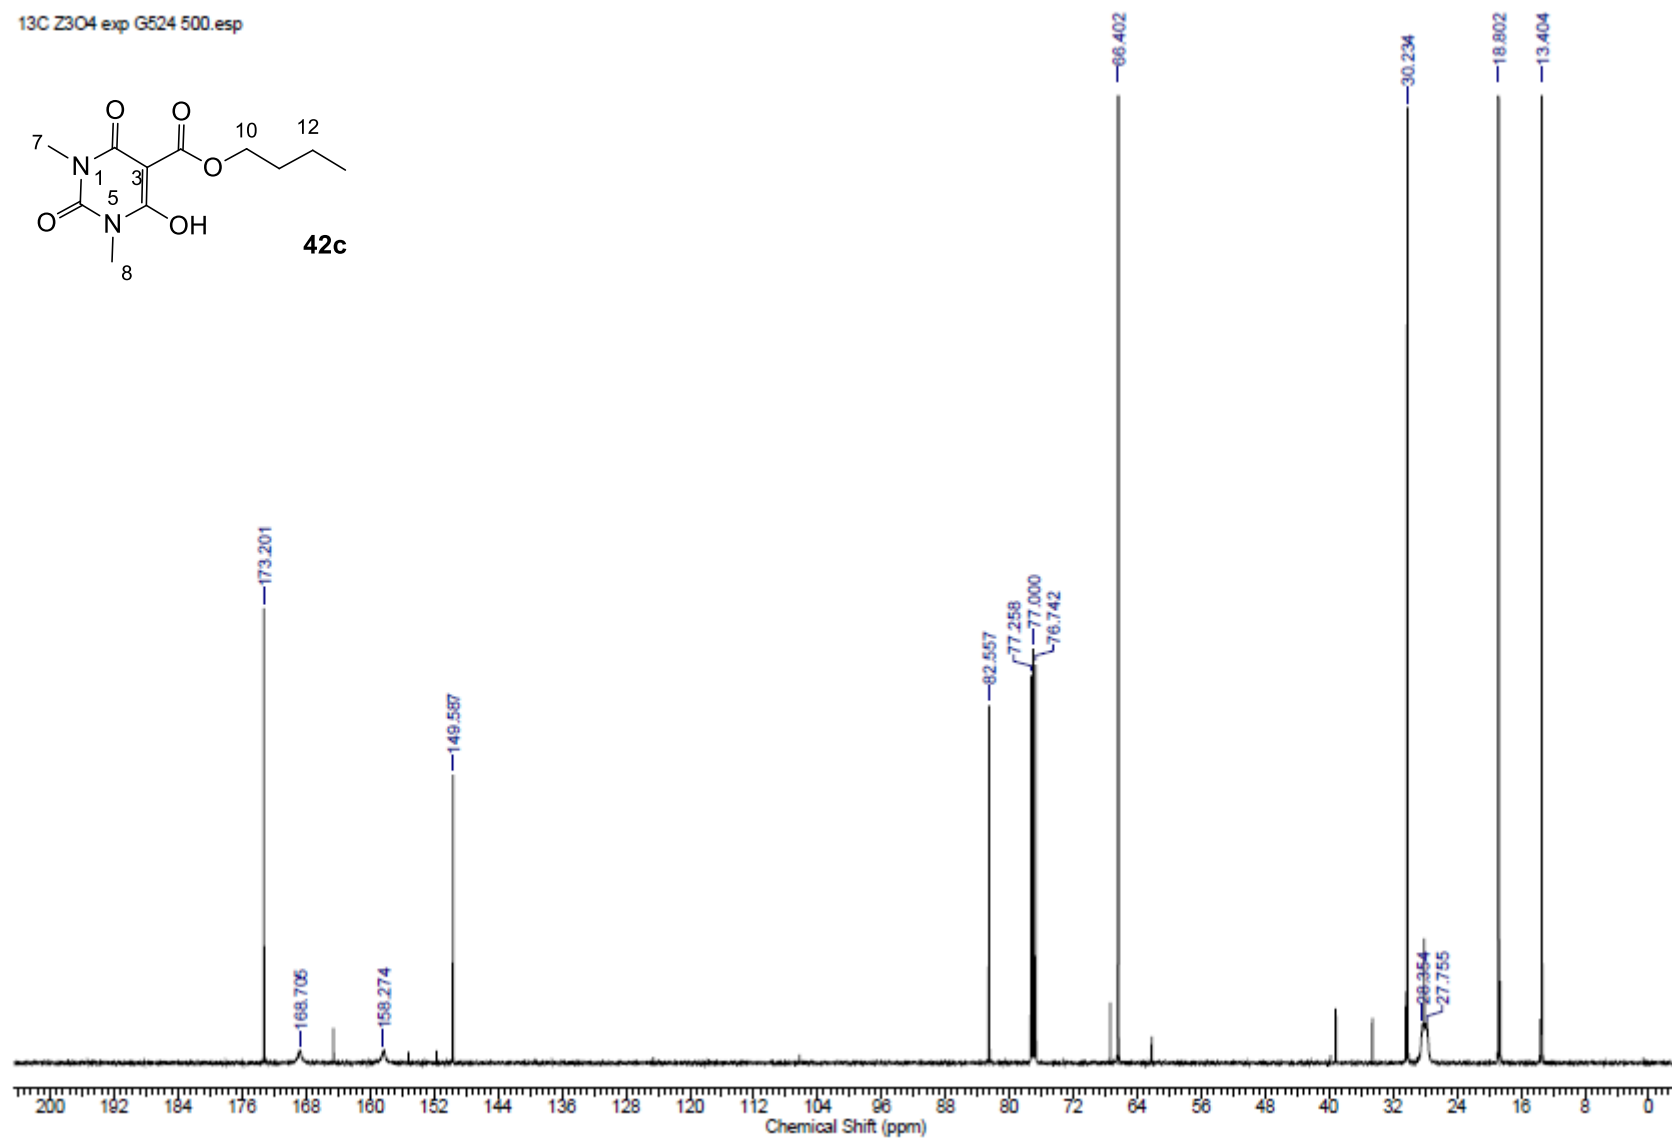

1H exp G564 Z404.esp

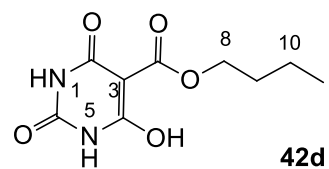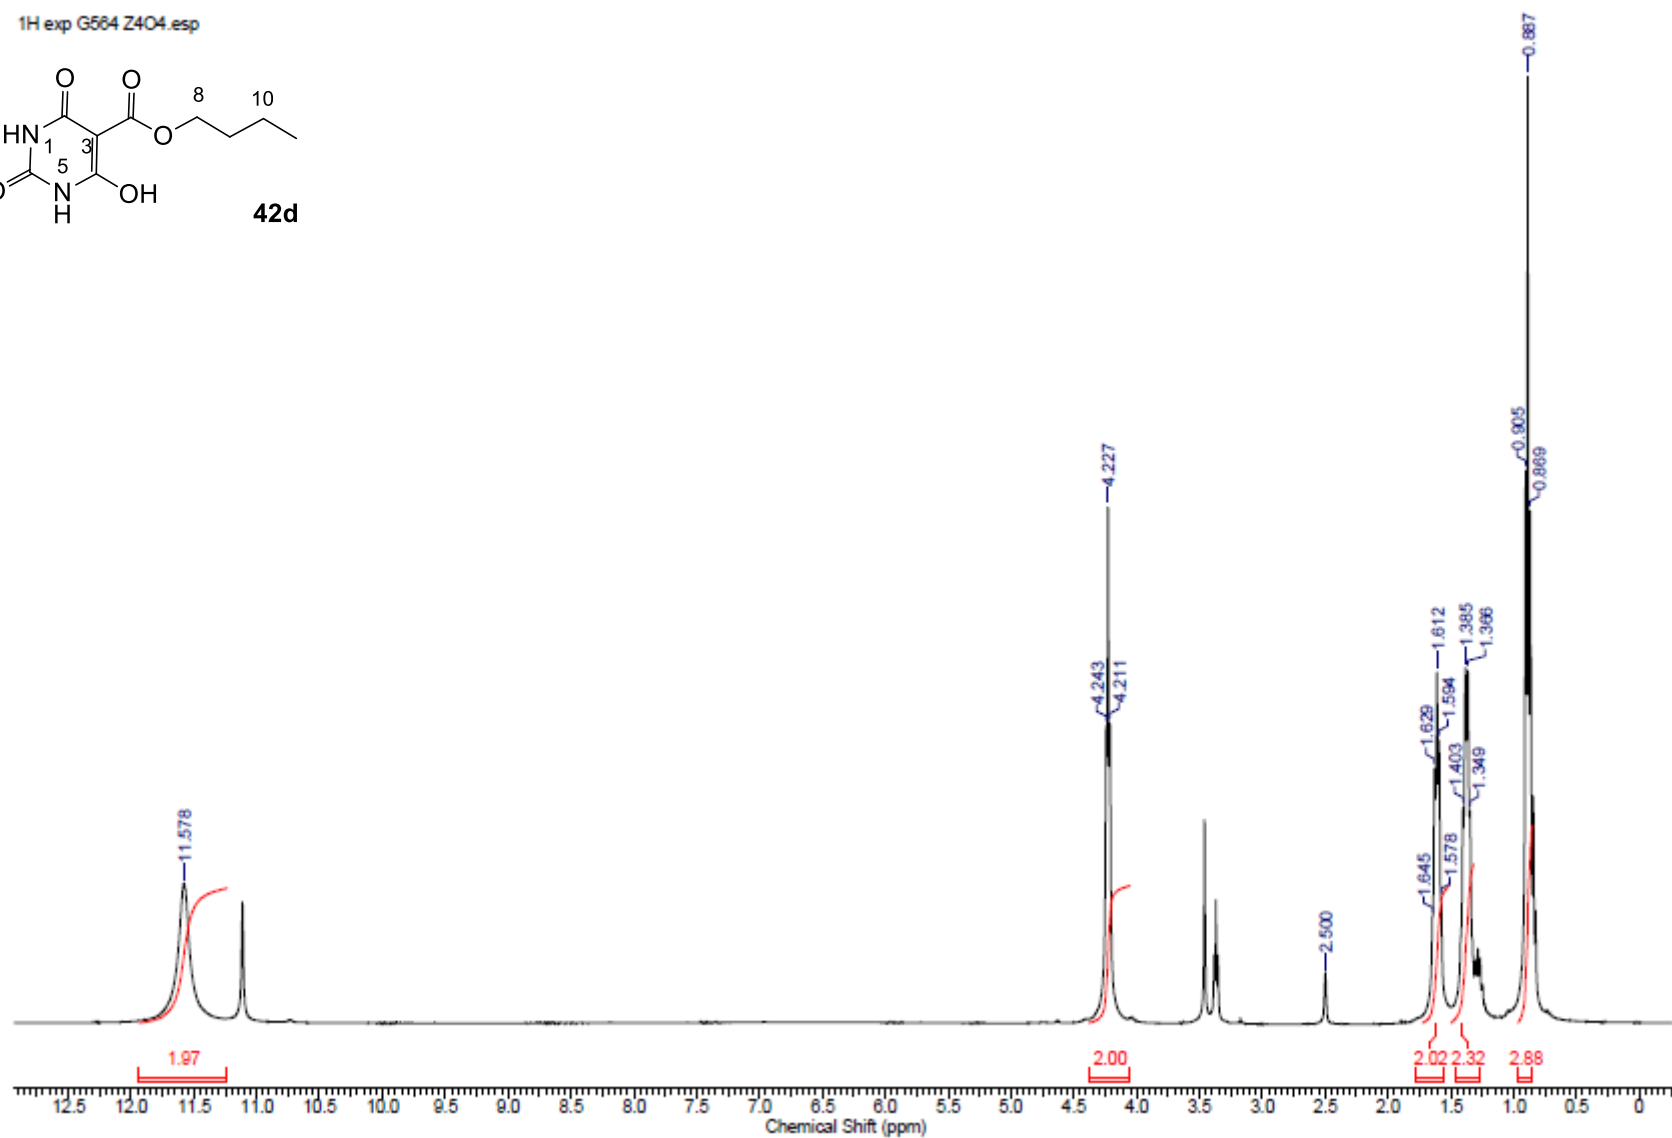

13C exp G564 Z4O4.esp

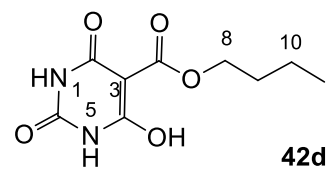

42d

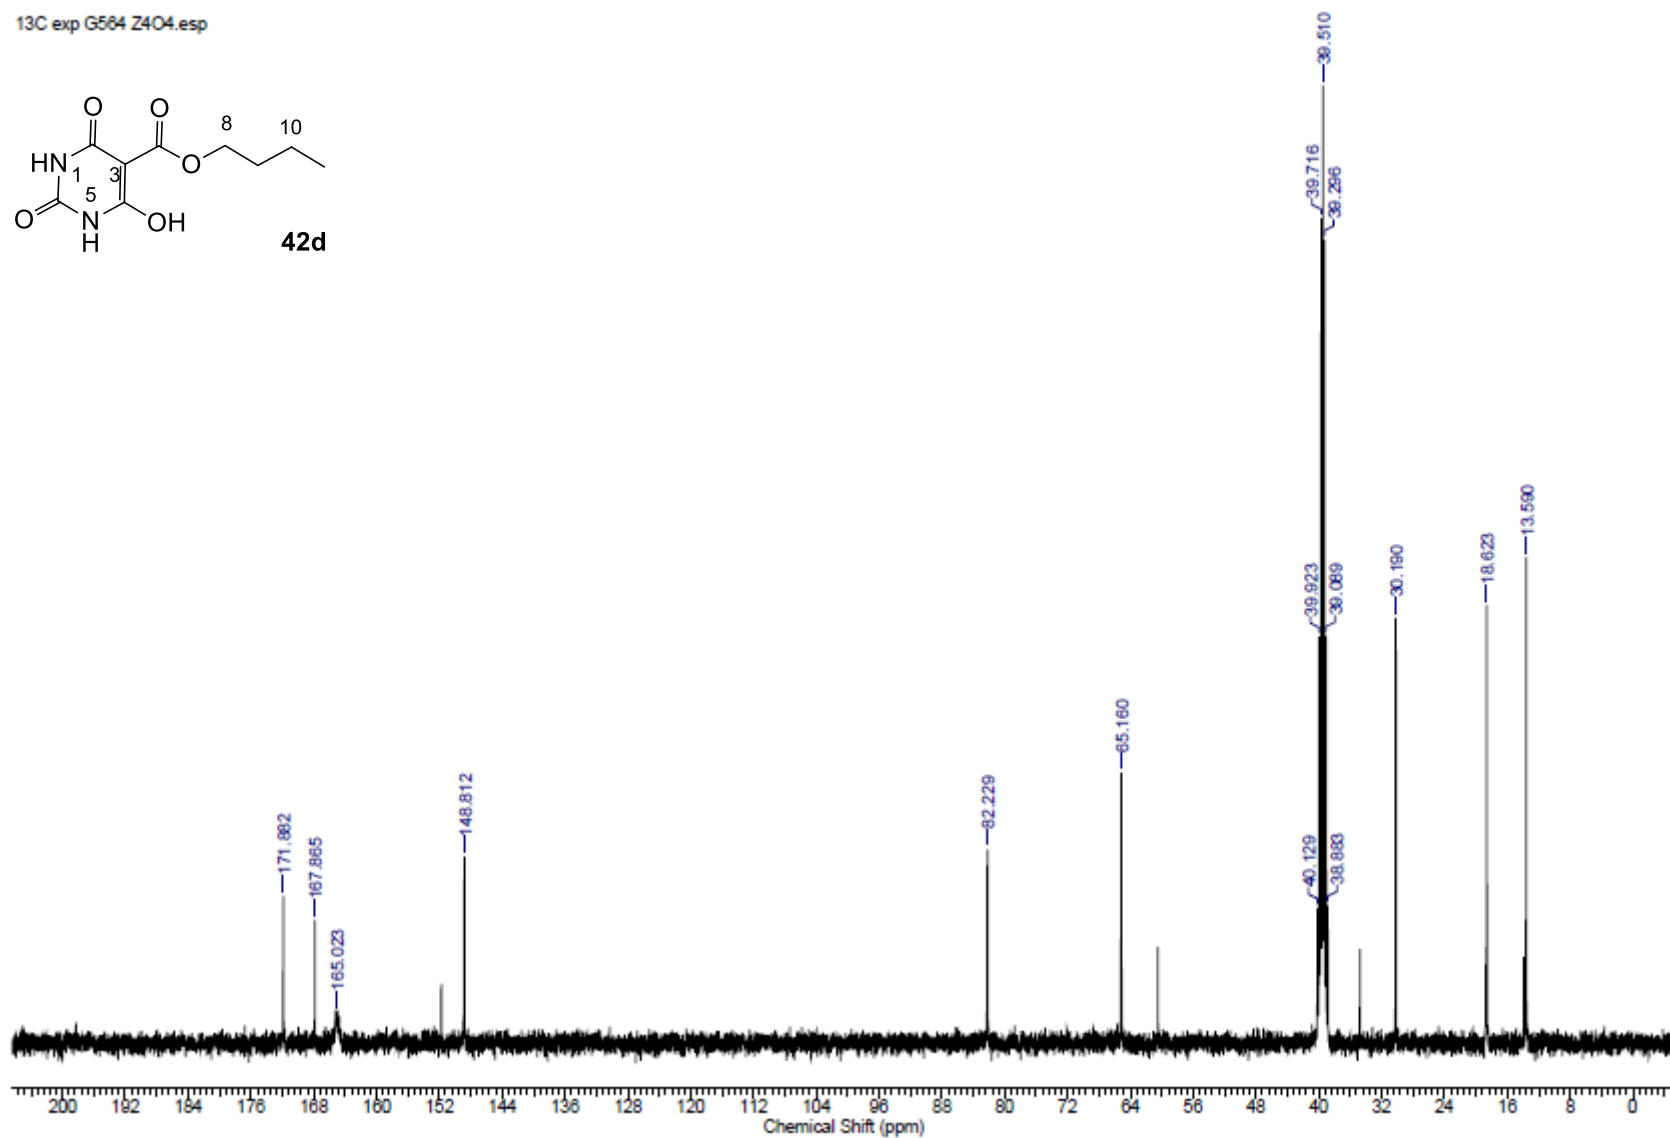

1H Z3-BP exp G512.esp

VerticalScaleFactor = 1

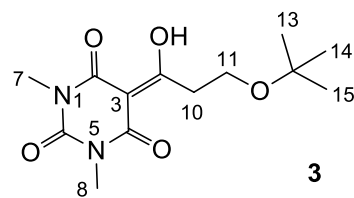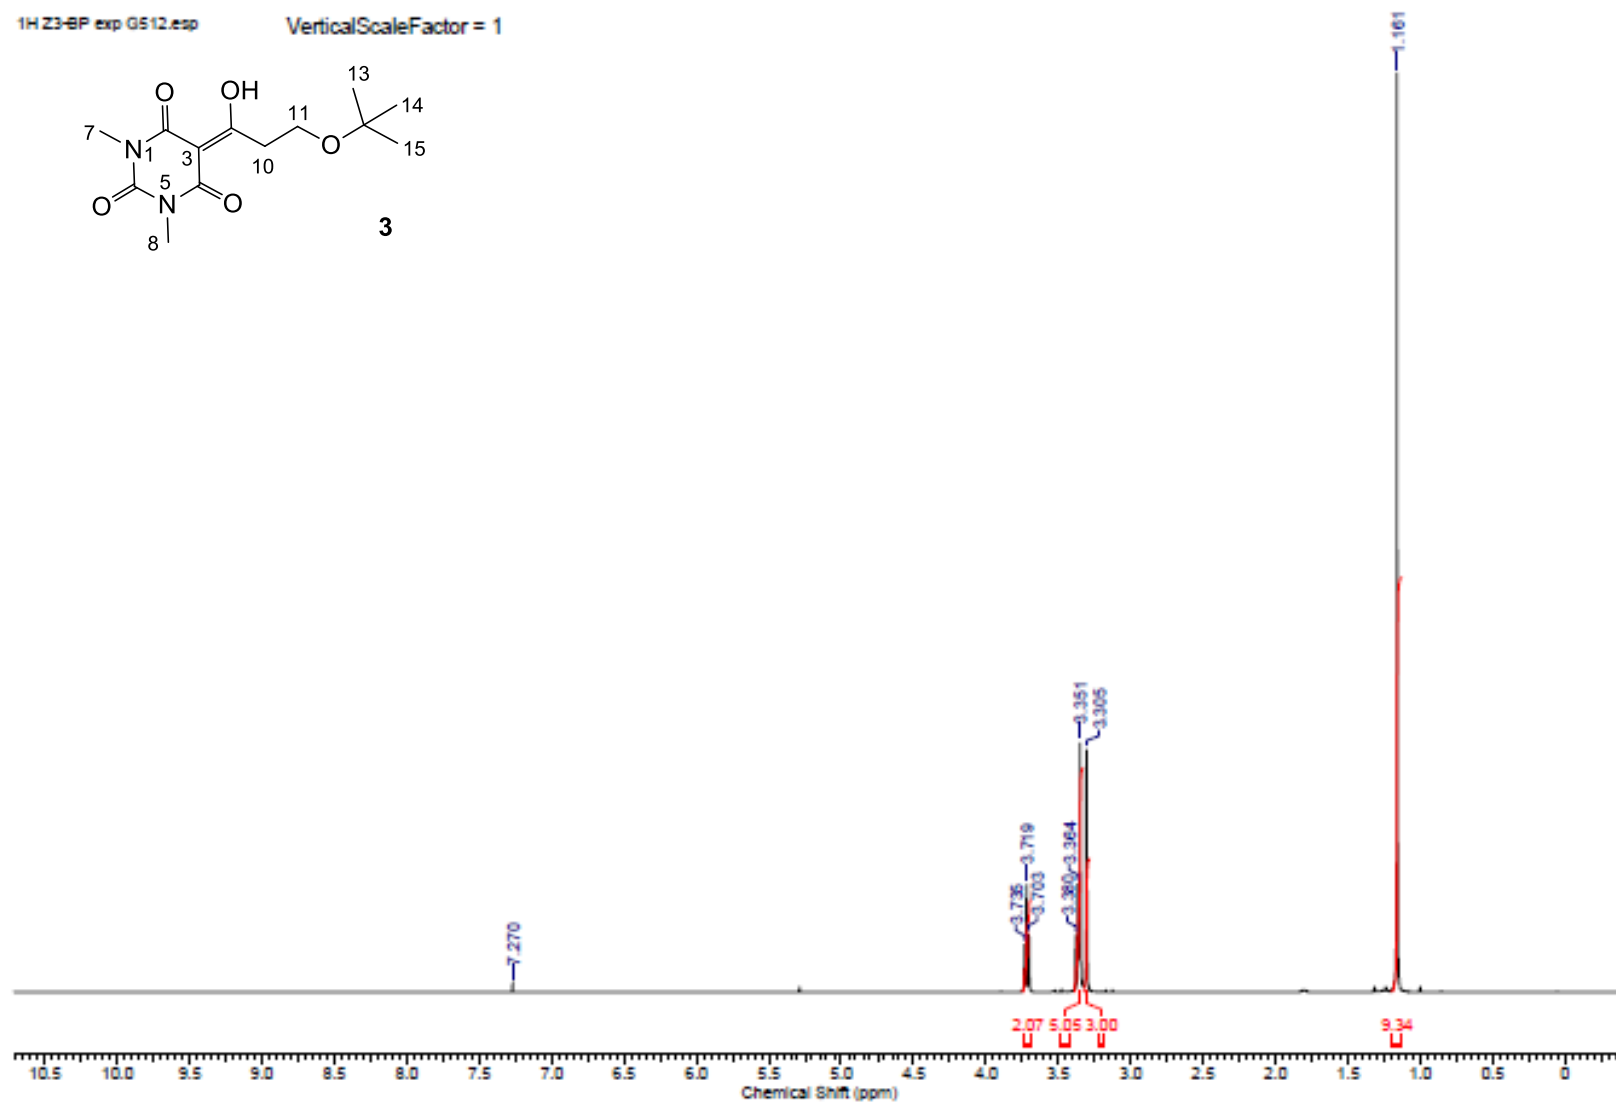

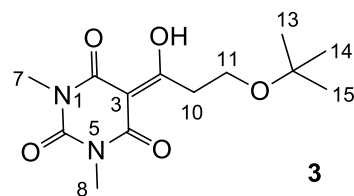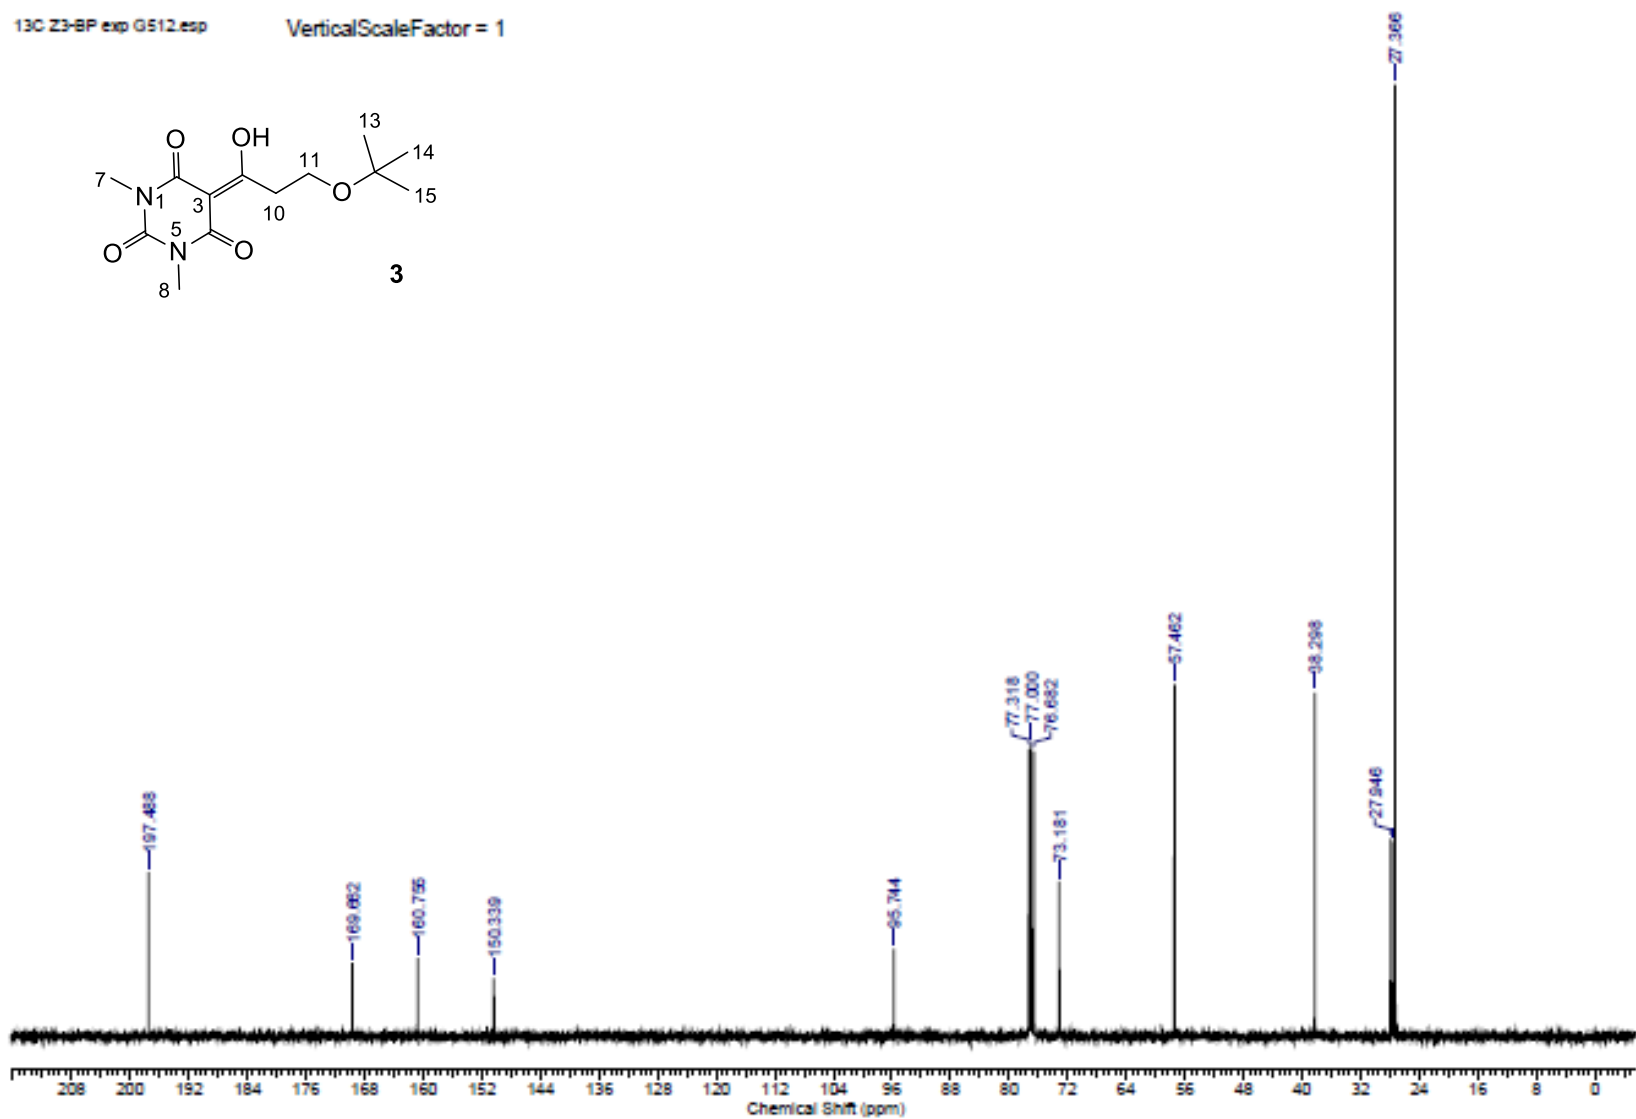



1H Z8-TB exp G534.esp

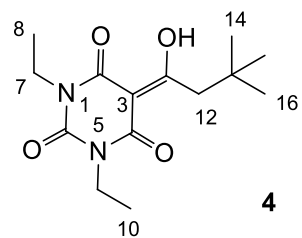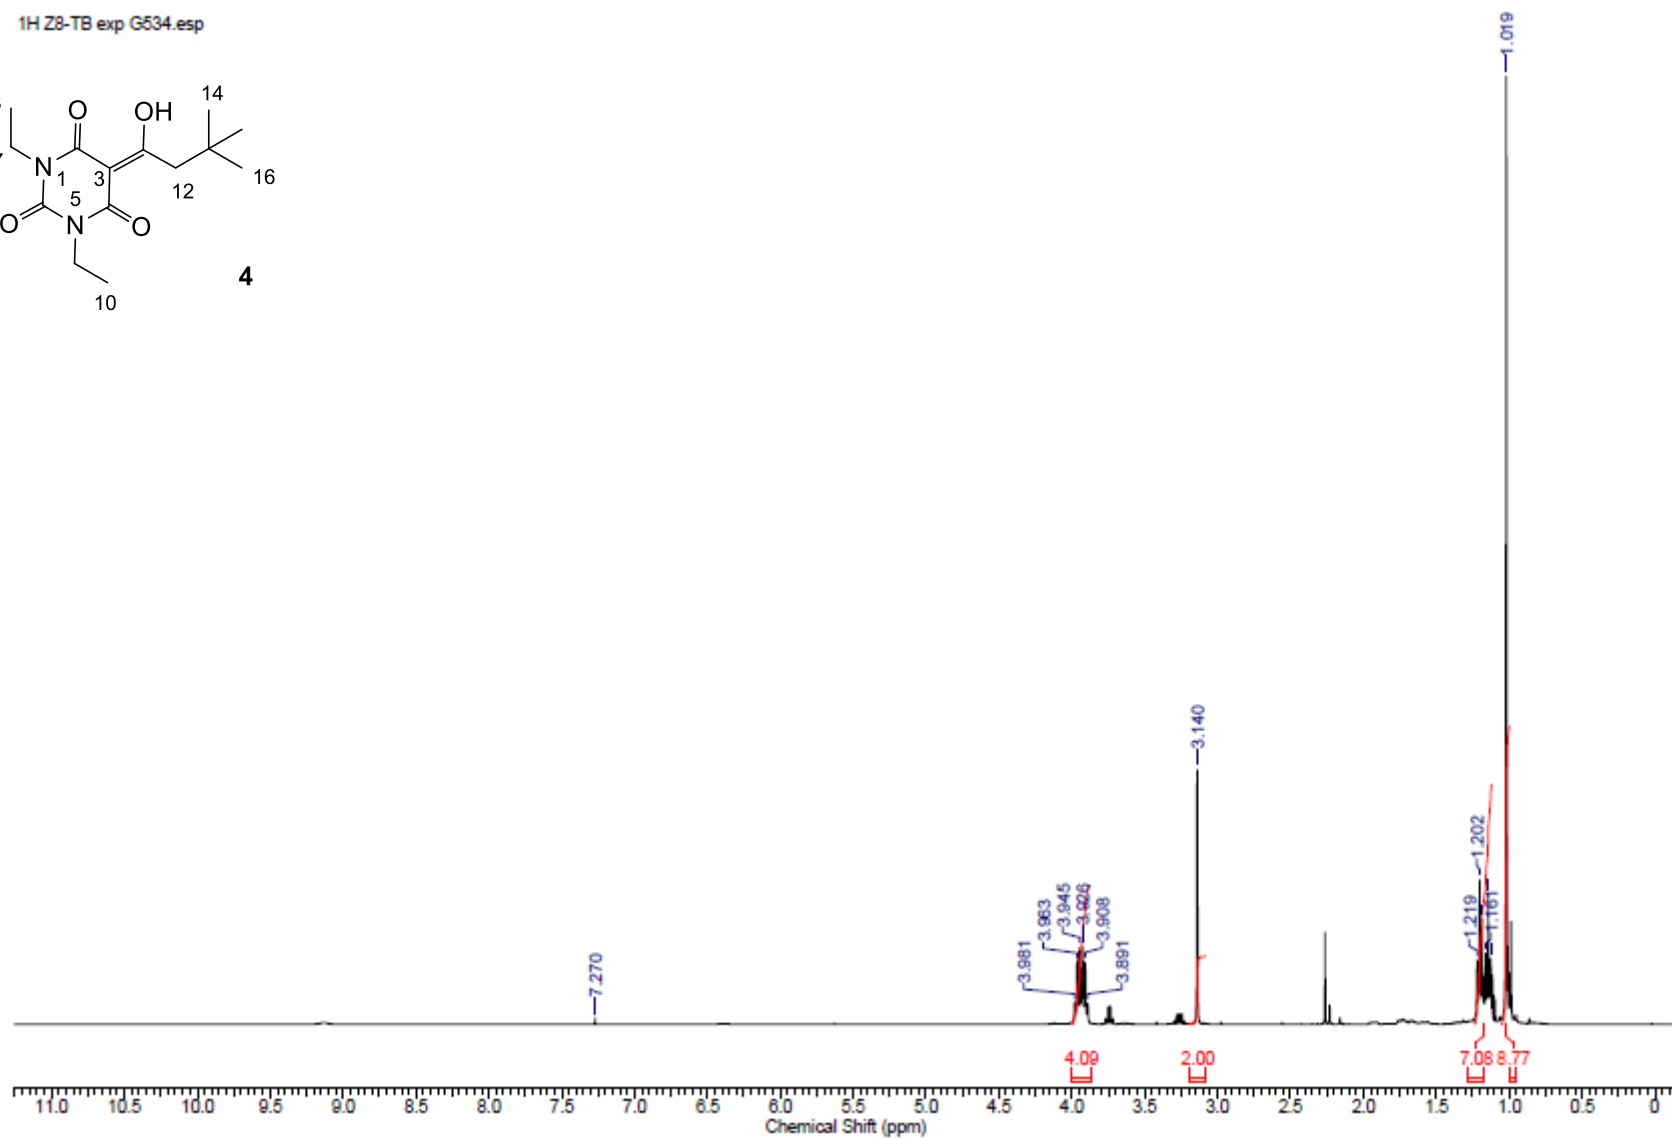

13C Z8-TB exp G534.esp

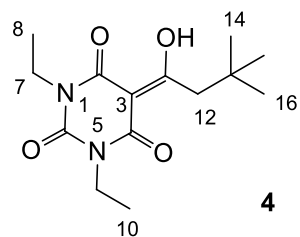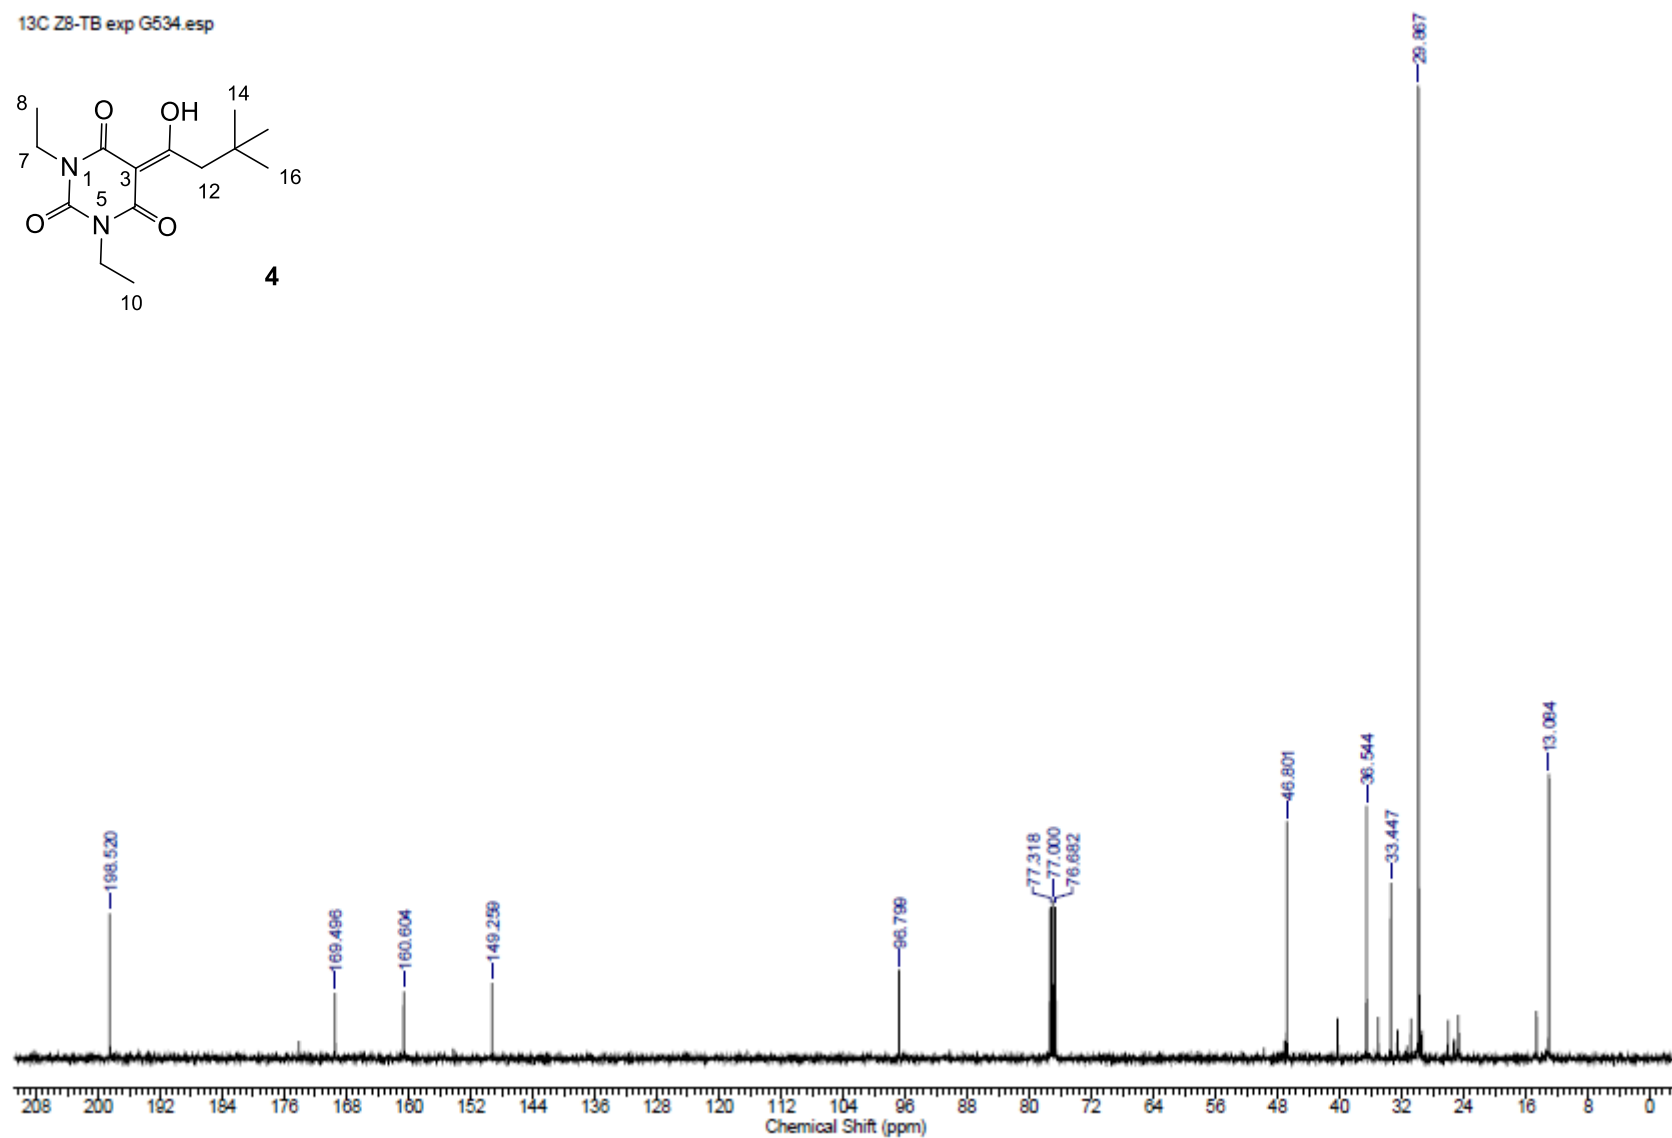

1H Z8-TMH exp G550.esp

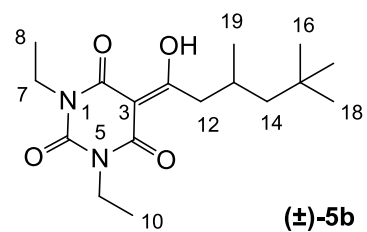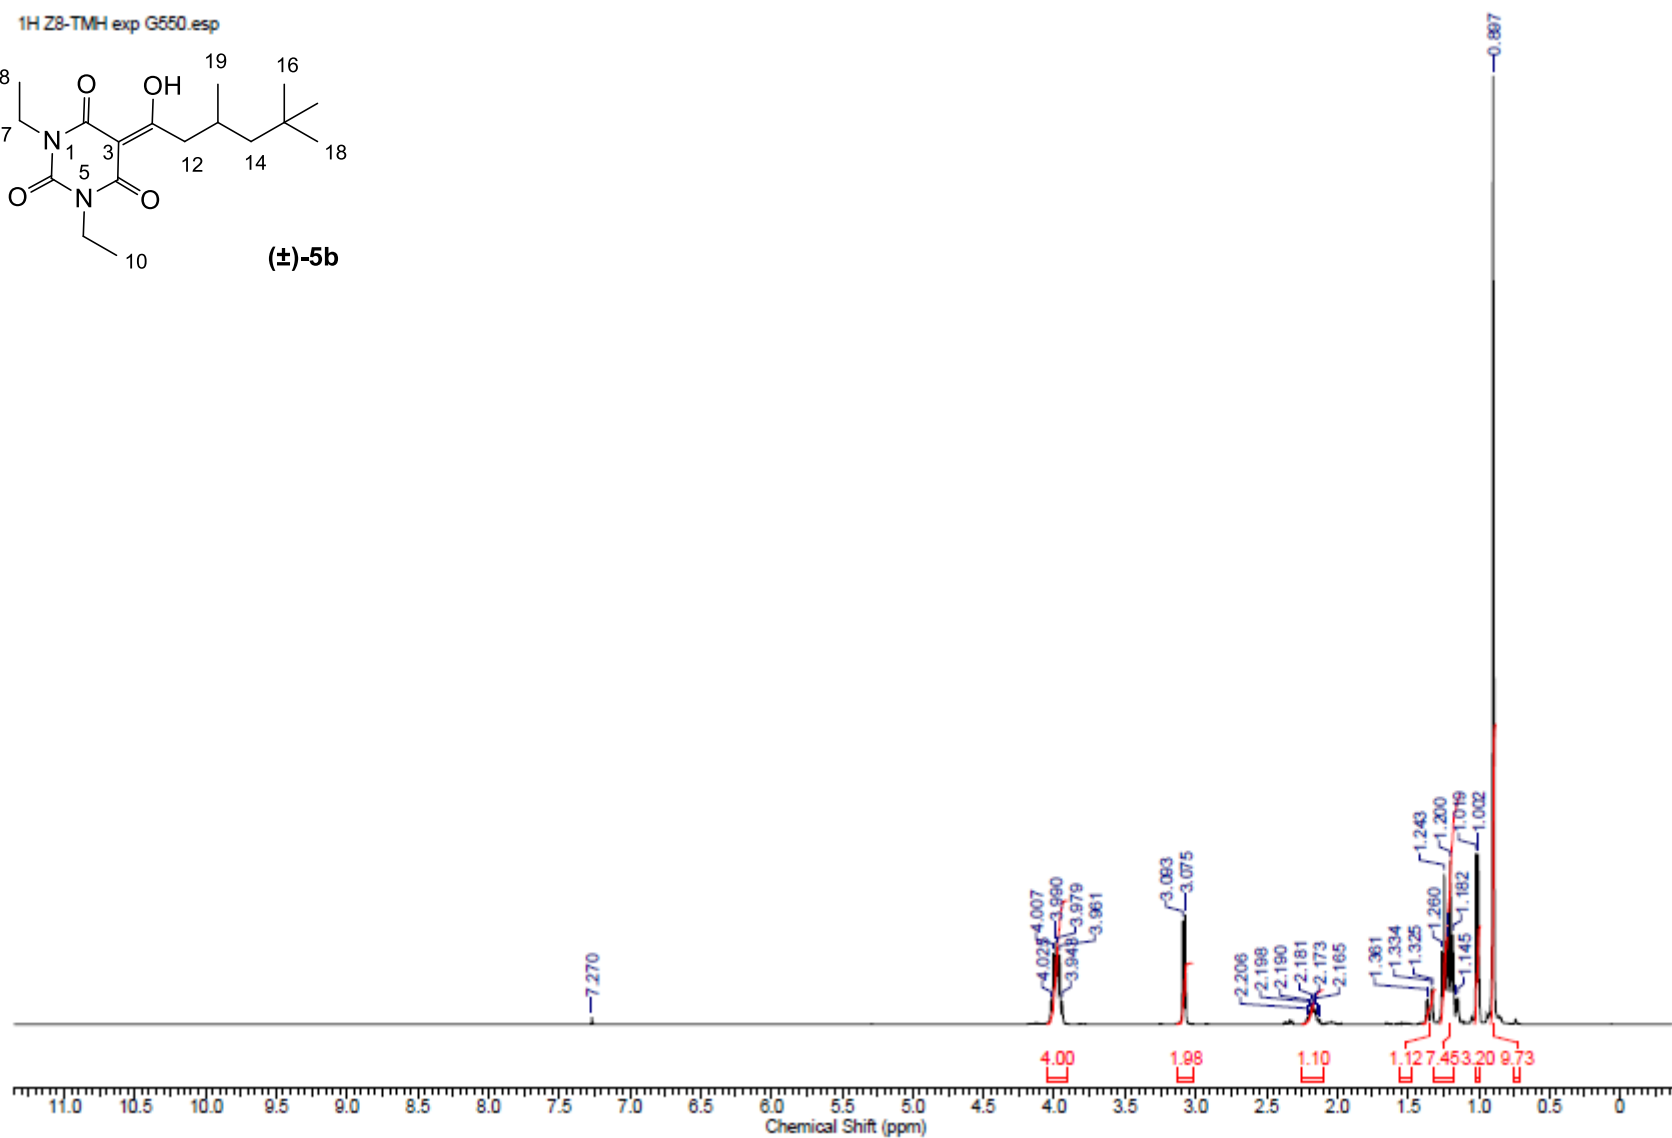

13c Z8-TMH exp G550.esp

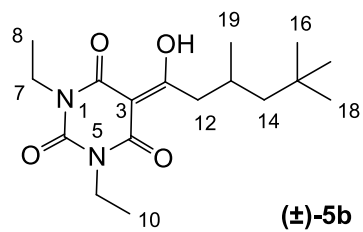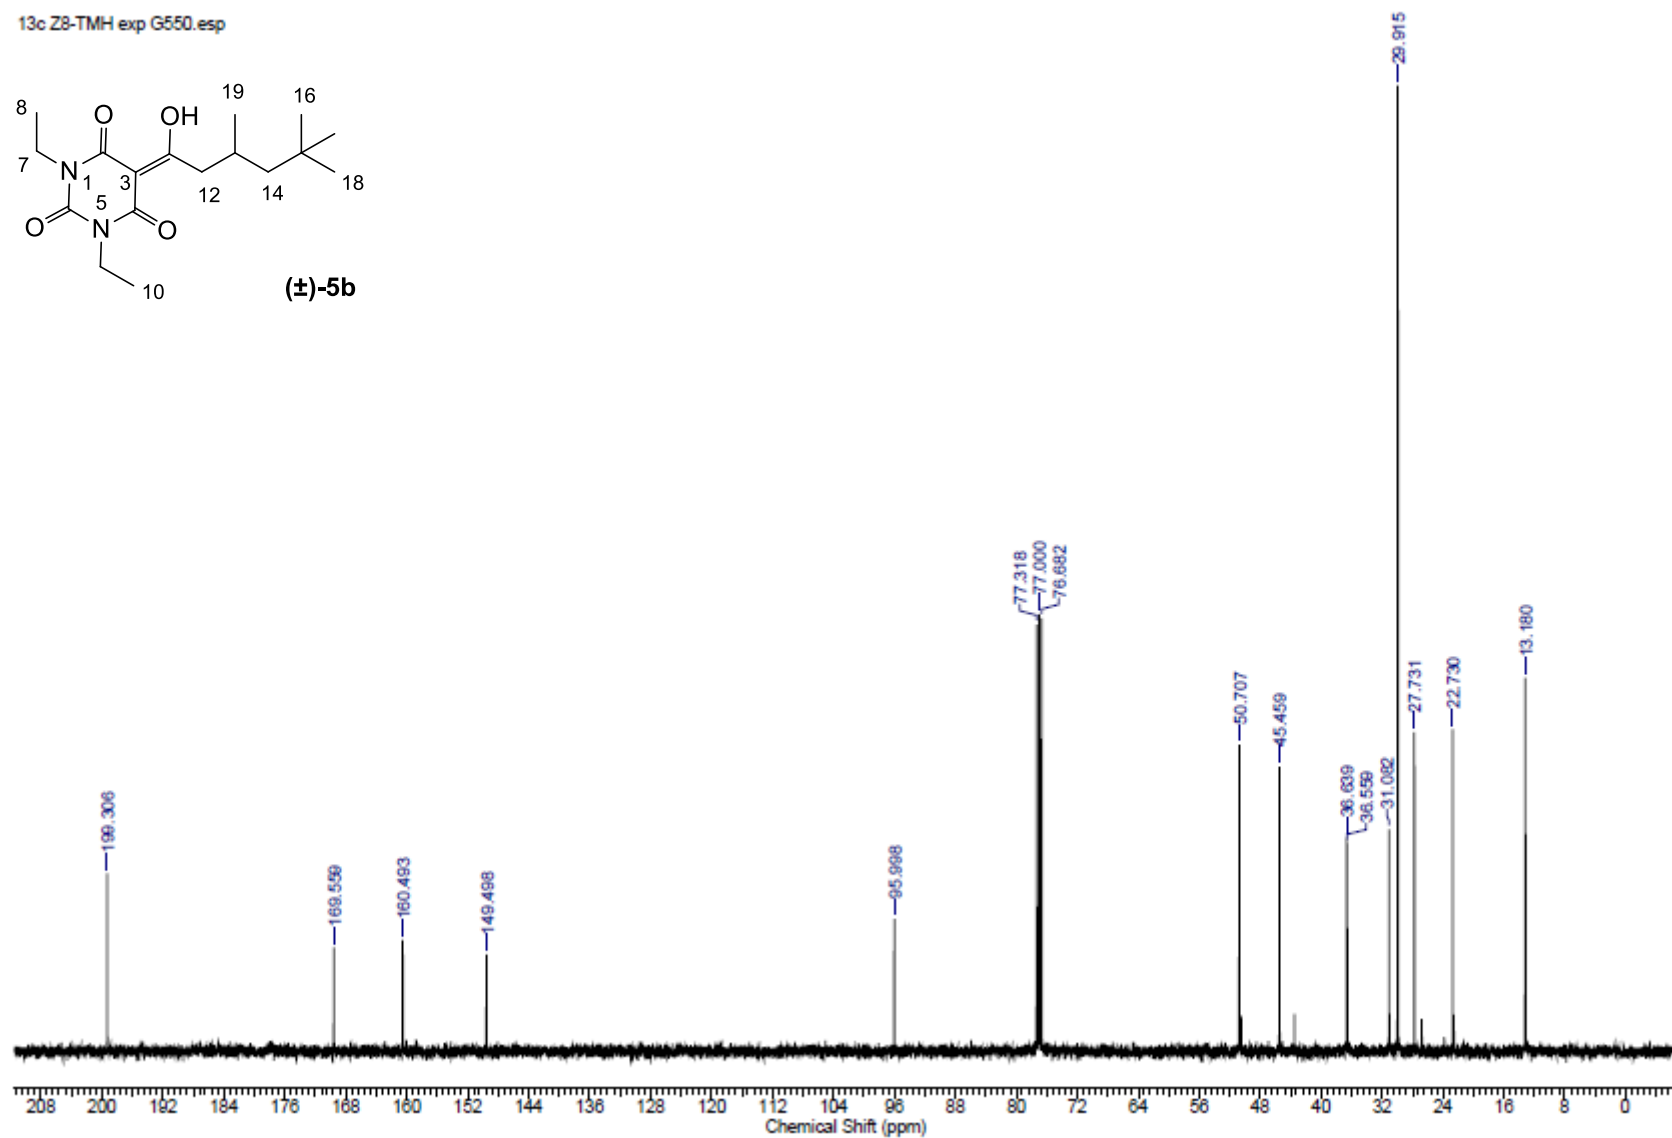

1H Z9-TMH exp G576.esp

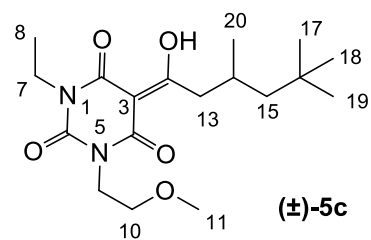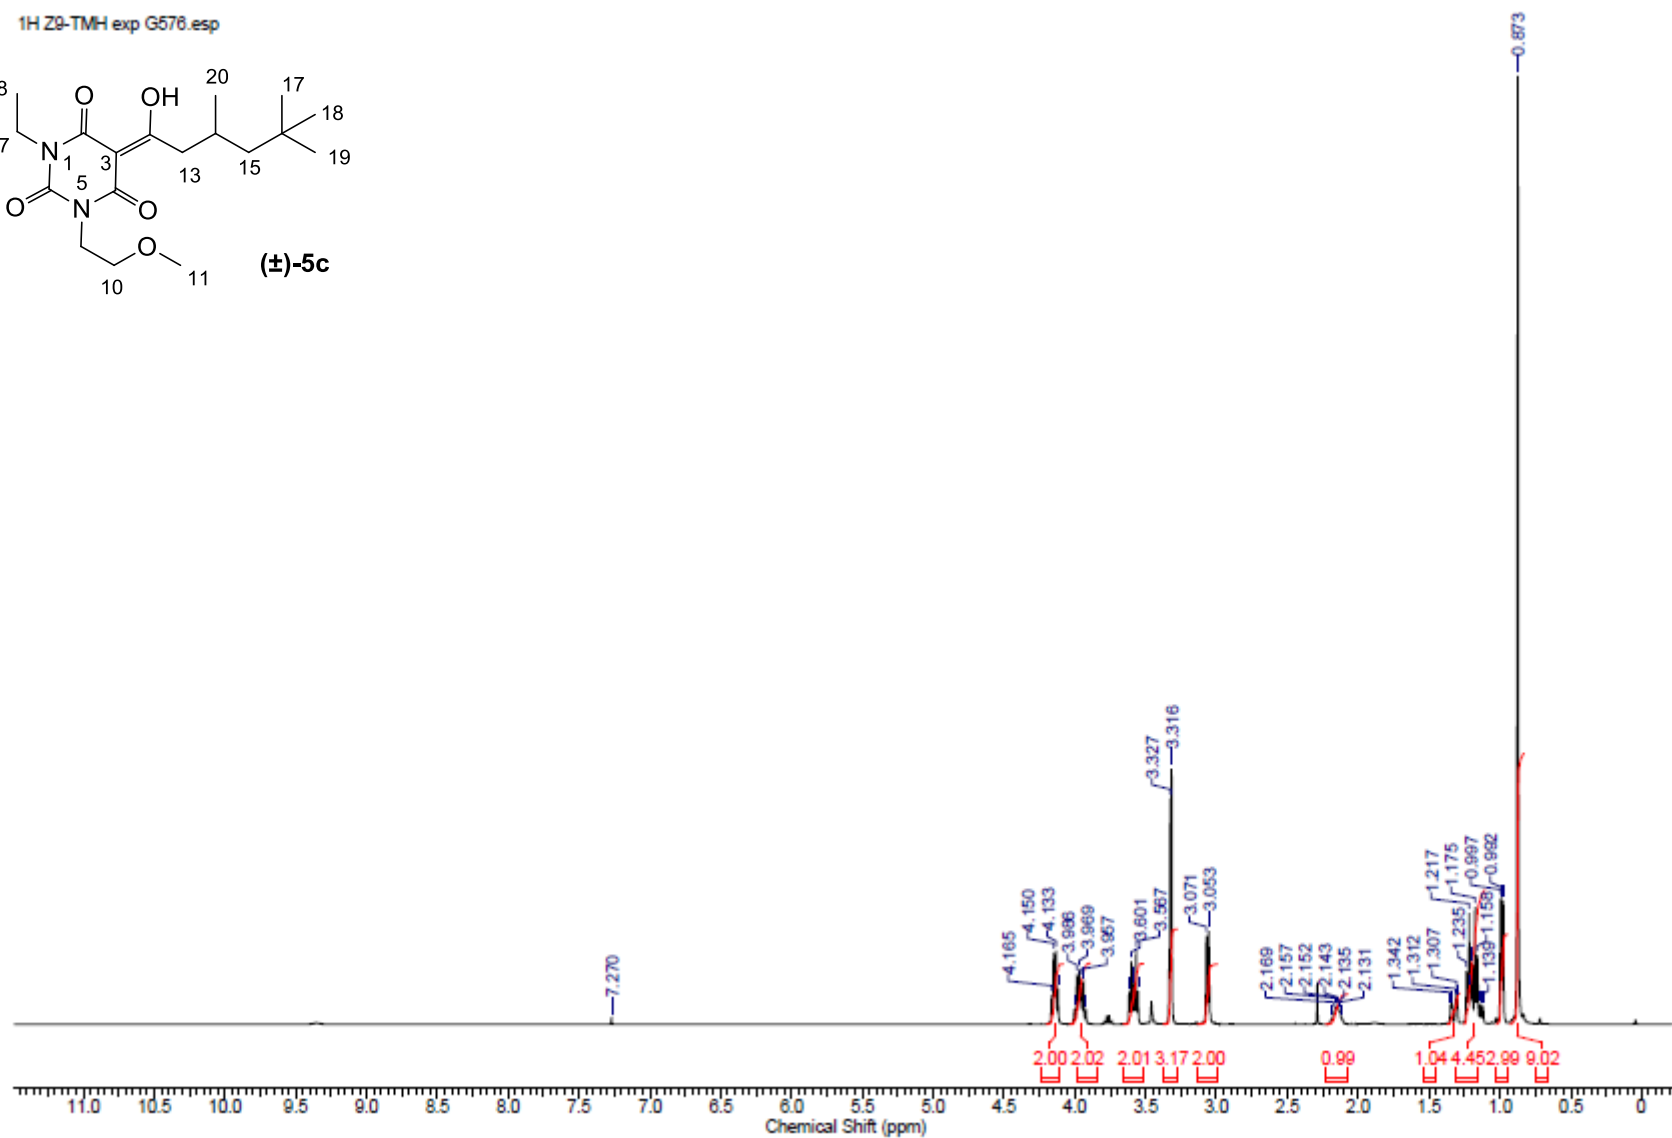

13C Z9-TMH exp G576.esp

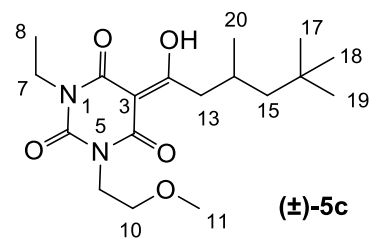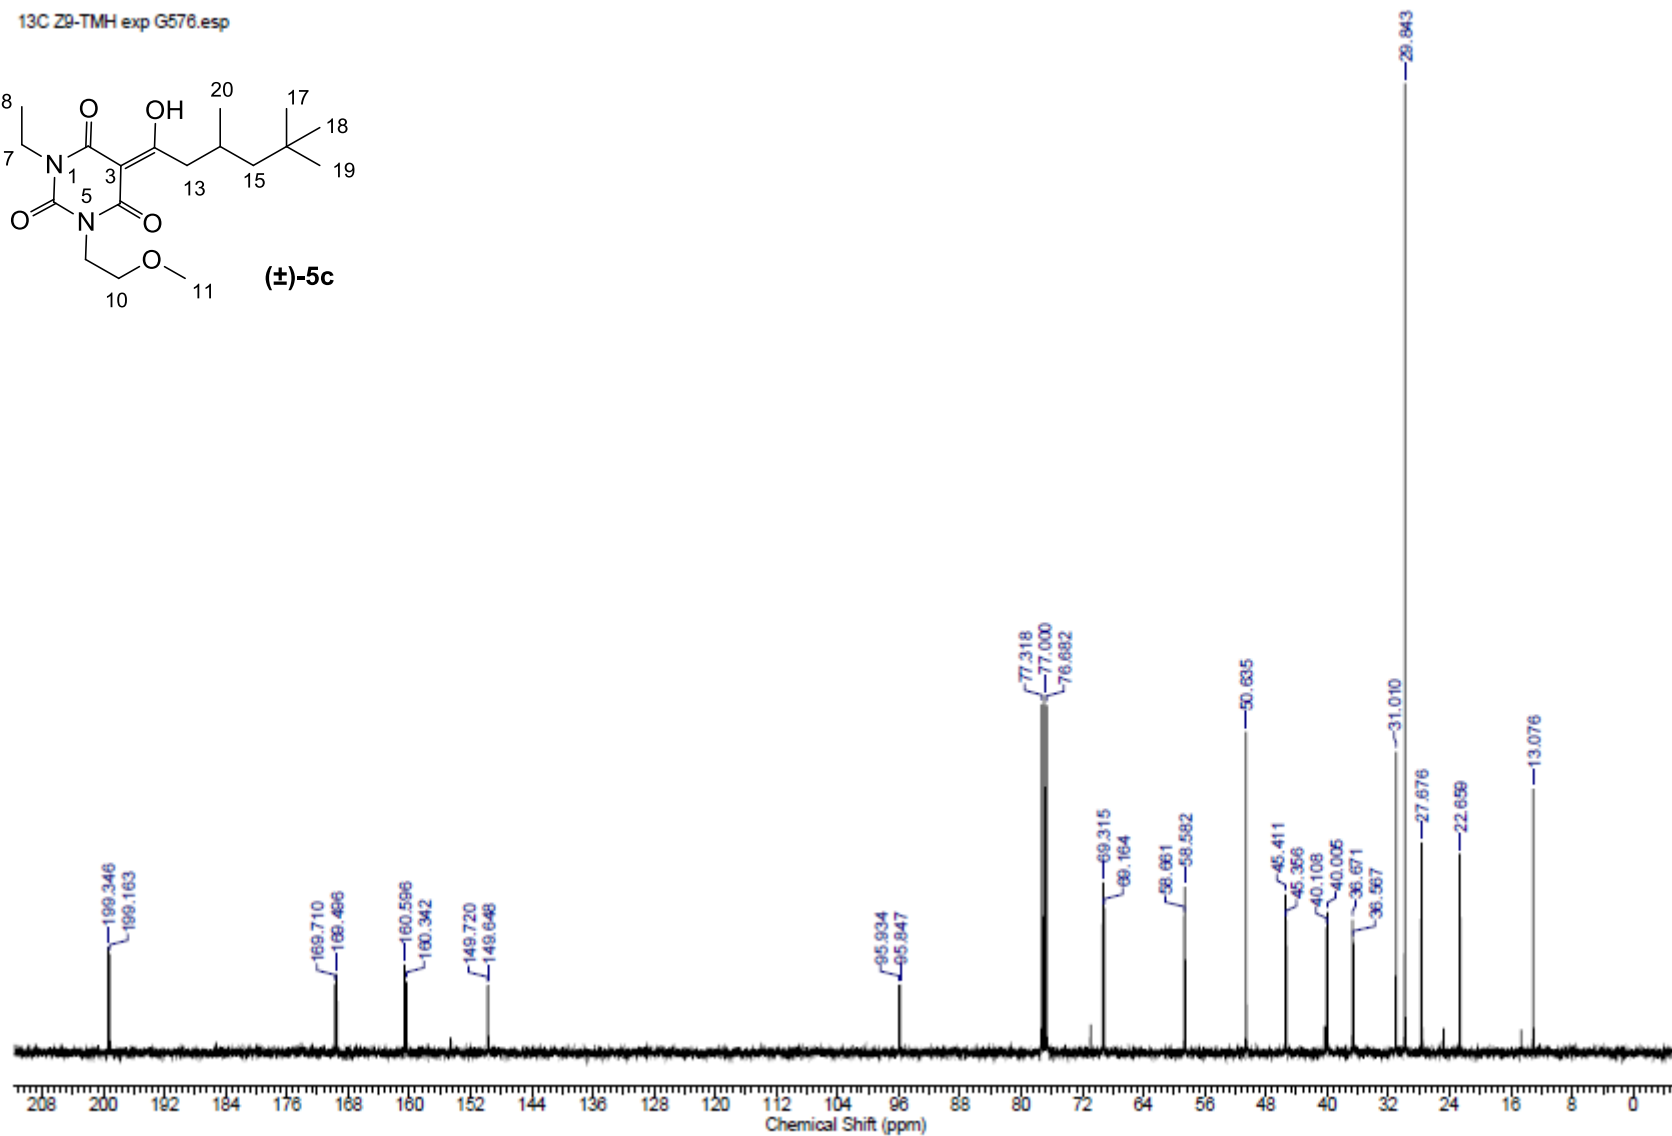

1H Z3-C1AD.esp

VerticalScaleFactor = 1

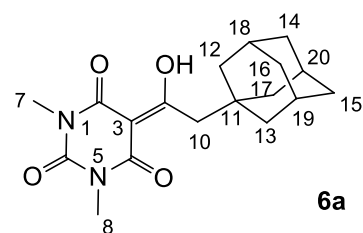

6a

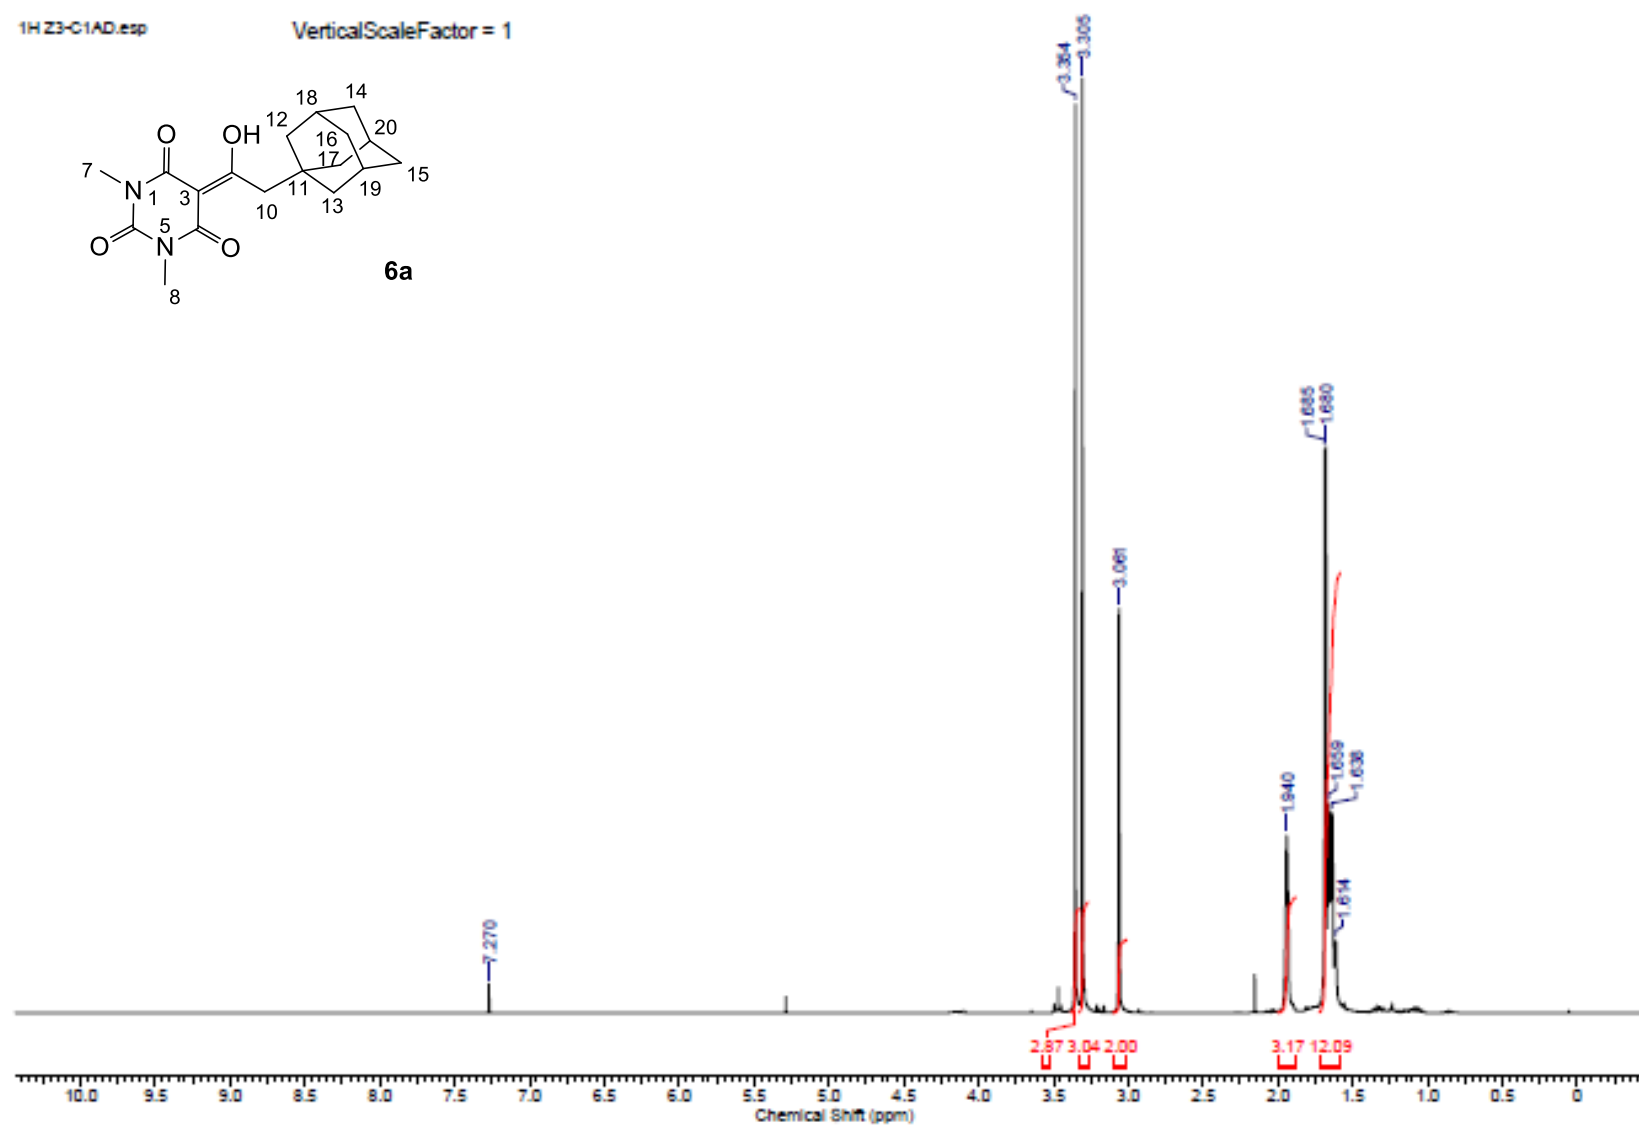

13C Z3-C1AD.esp

VerticalScaleFactor = 1

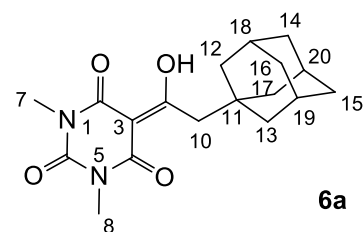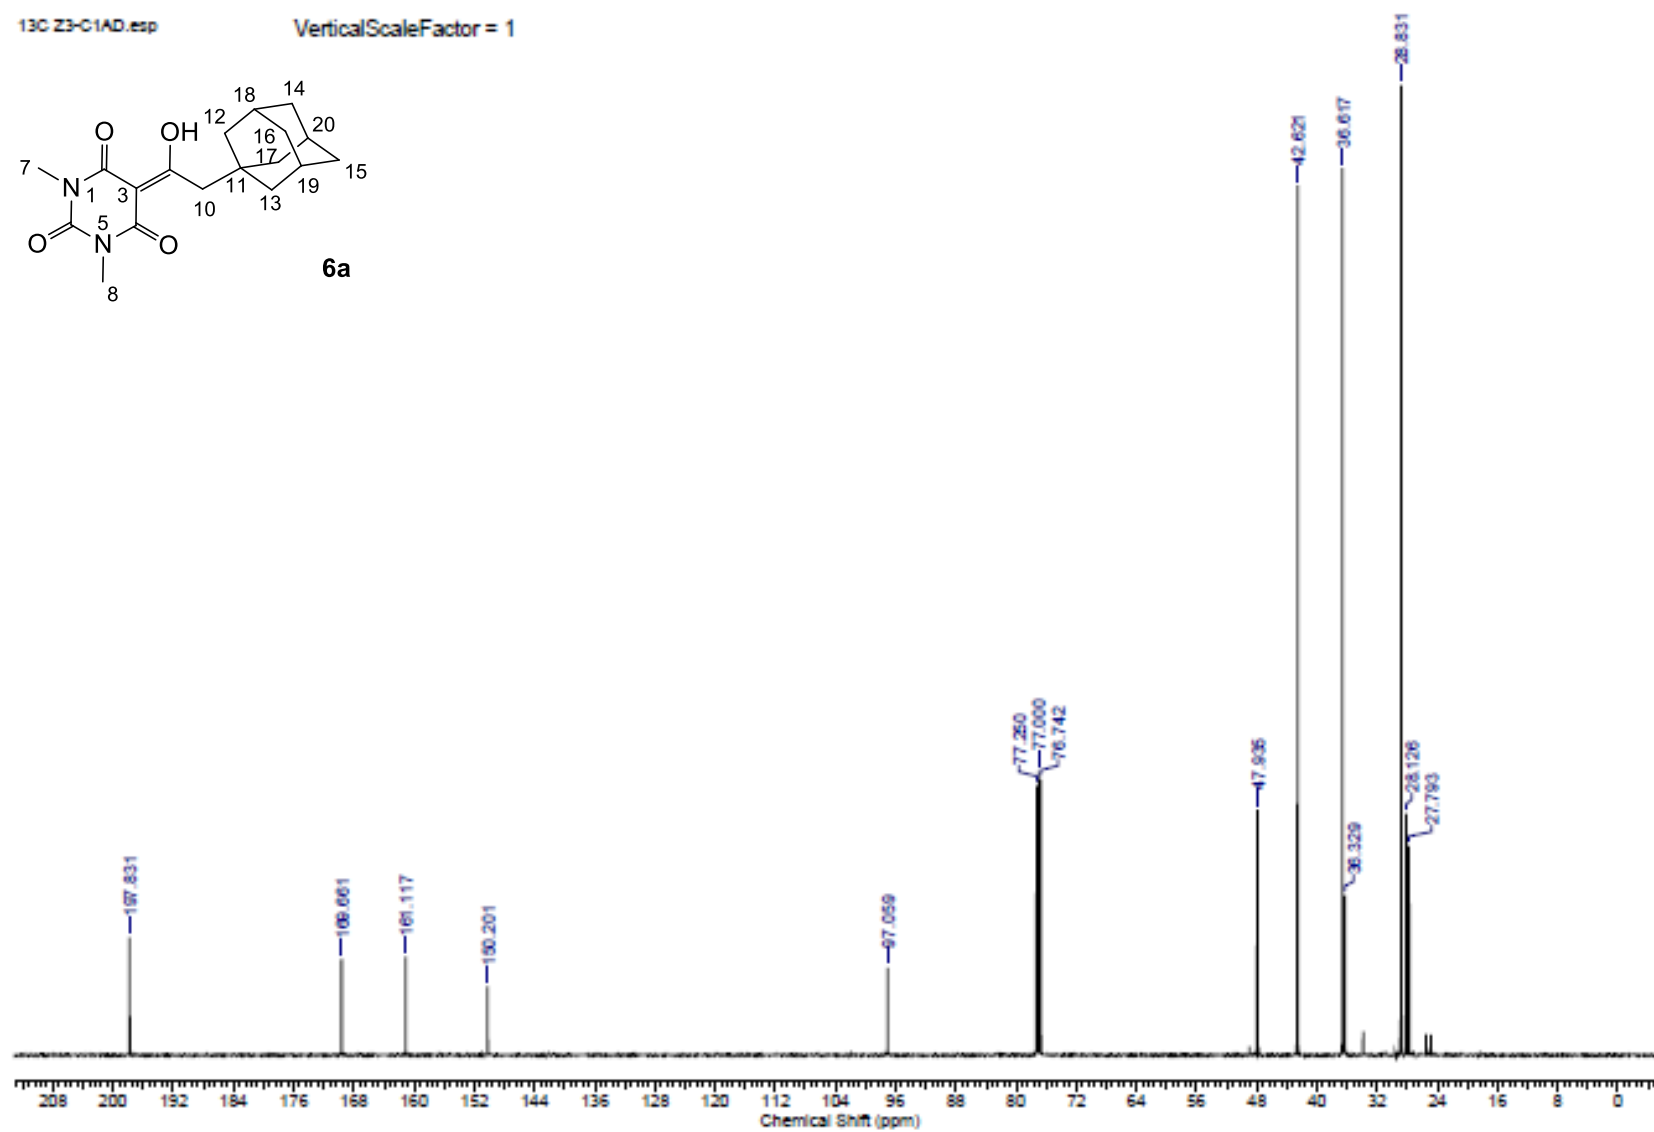



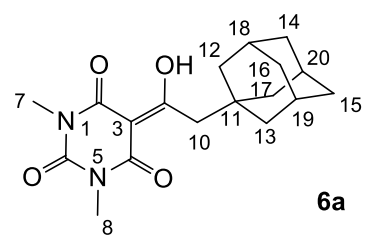

**6a**

HMBC Z3-C1AD.esp

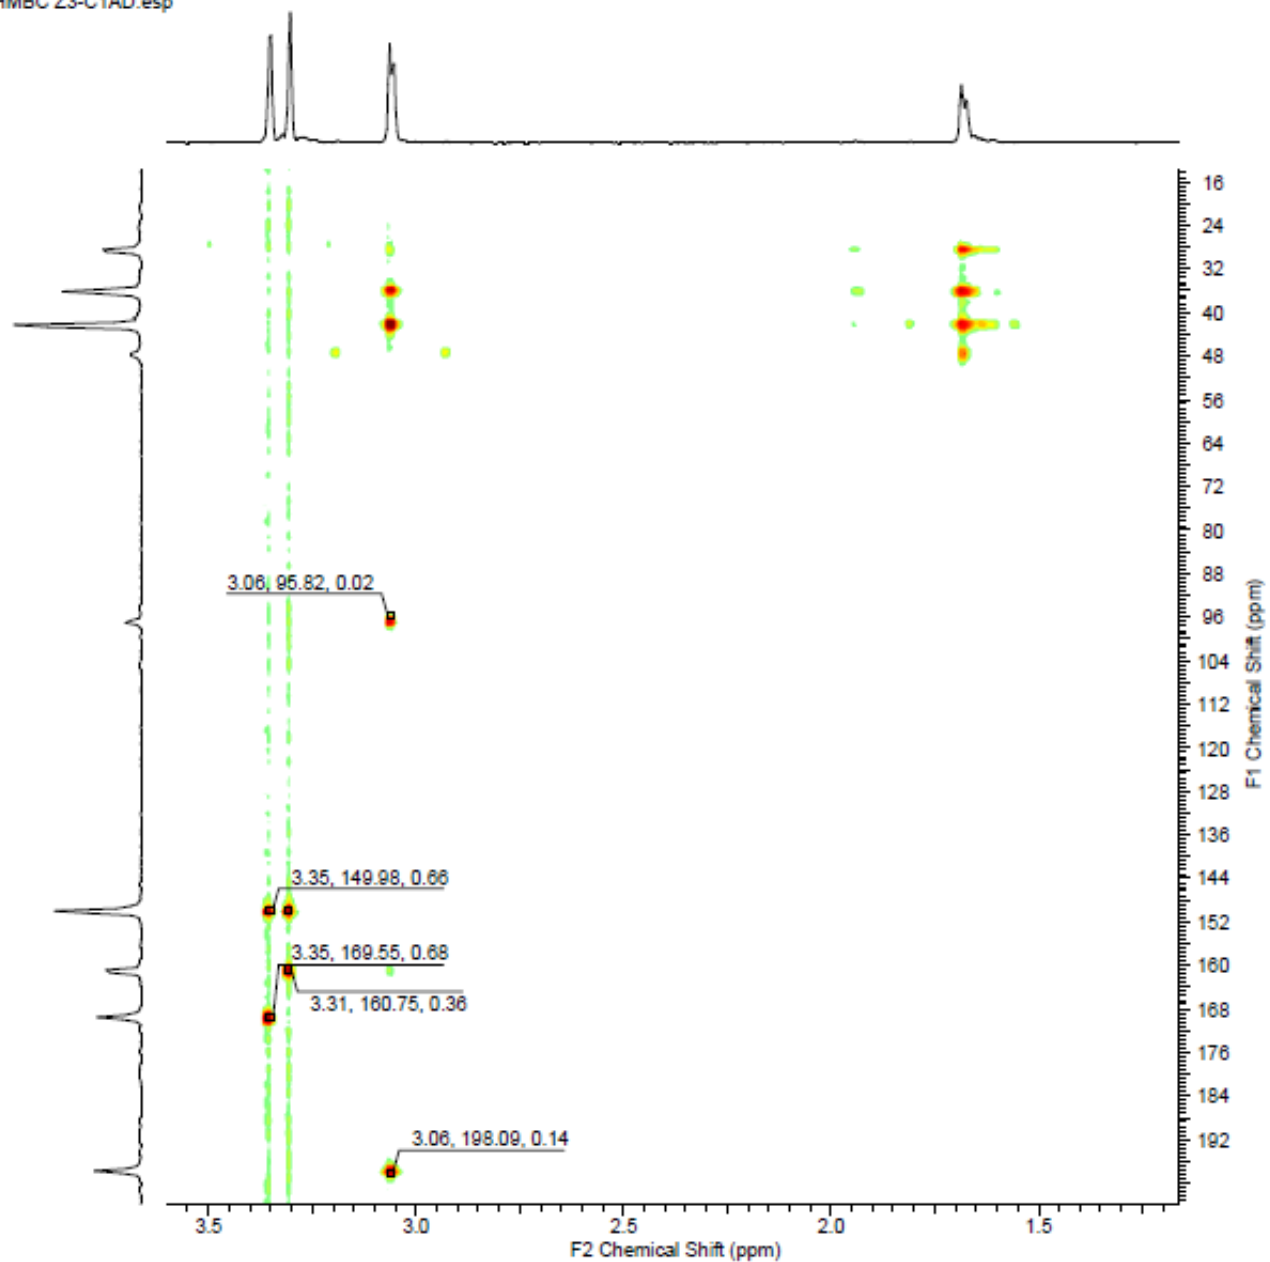

1H ZTA3-C1ADM exp G420.esp VerticalScaleFactor = 1

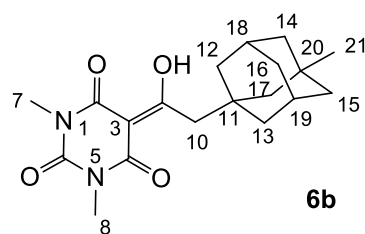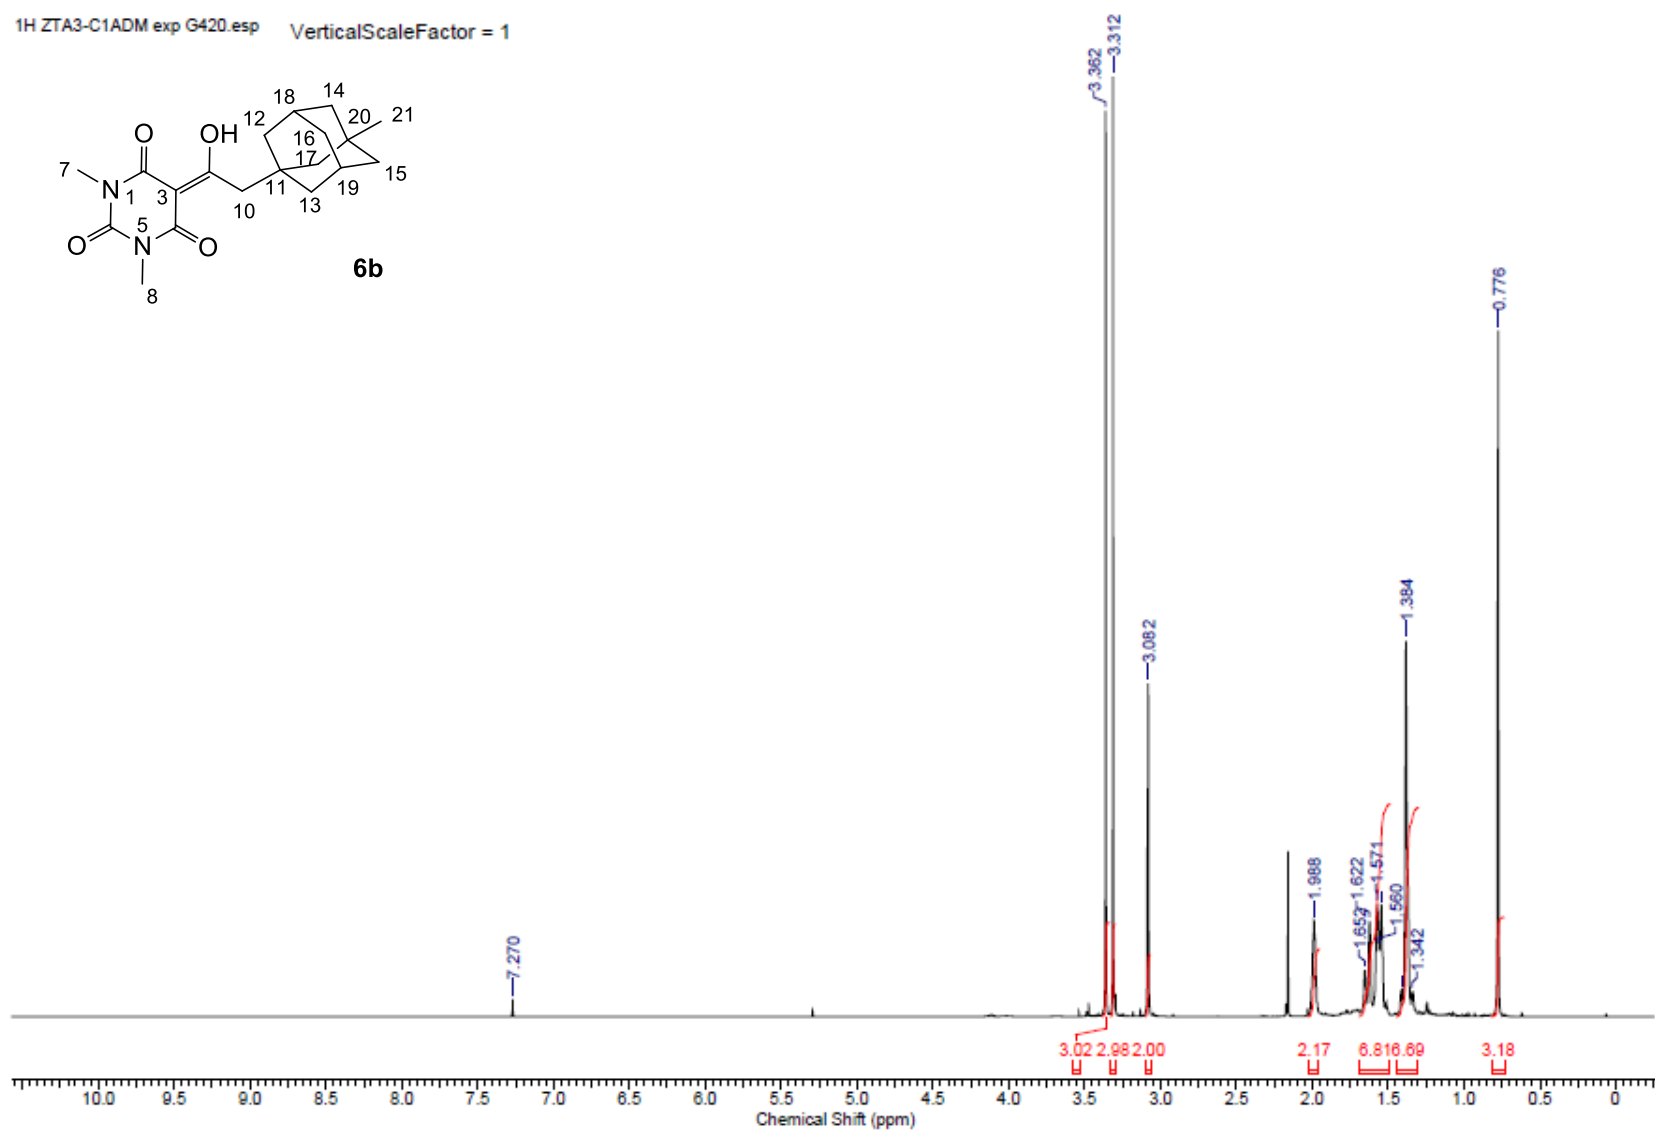

13C ZTA3-C1ADM exp G420.exp VerticalScaleFactor = 1

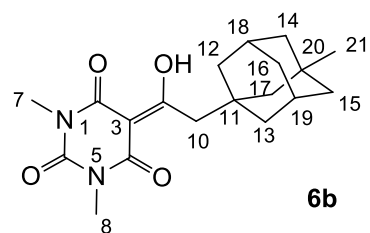

6b

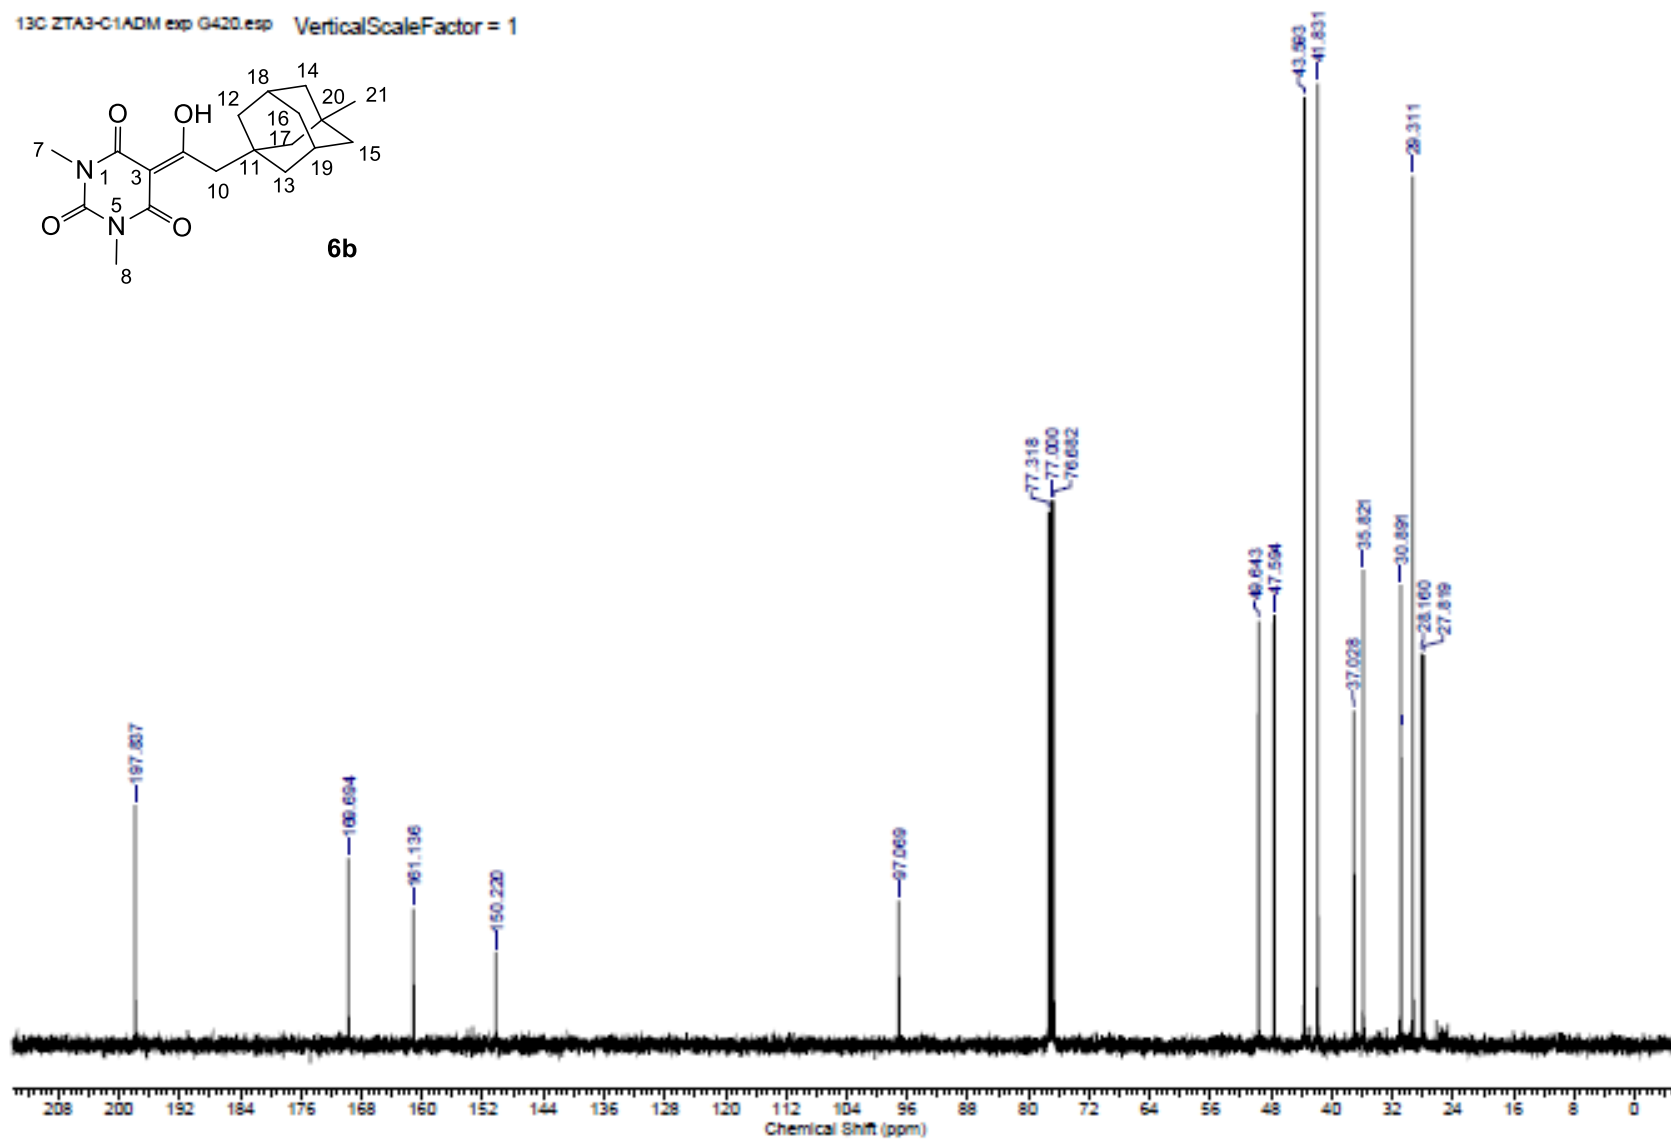

1H ZTA3-C1ADD exp G366.exp VerticalScaleFactor = 1

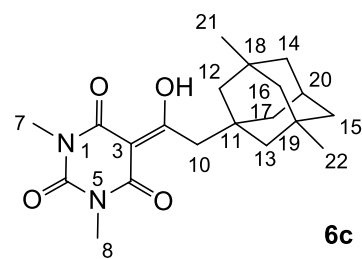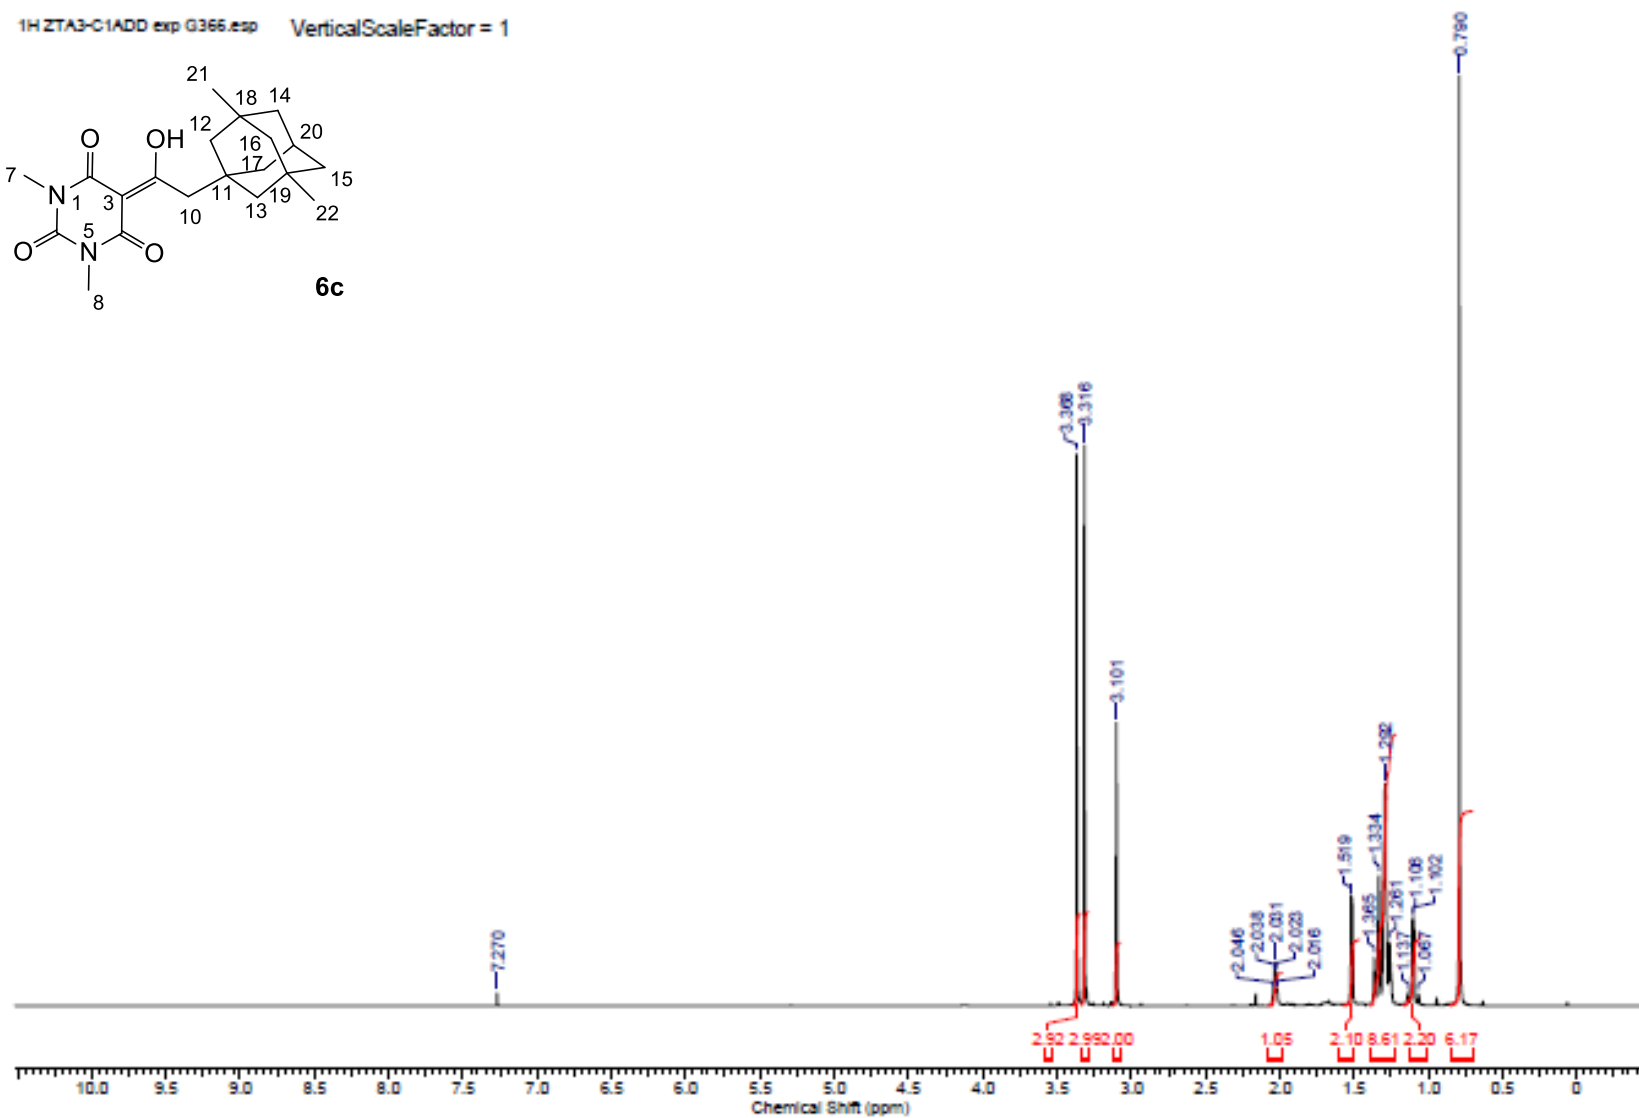

13C ZTA3-C1ADD exp G366.exp VerticalScaleFactor = 1

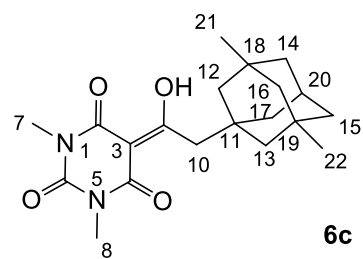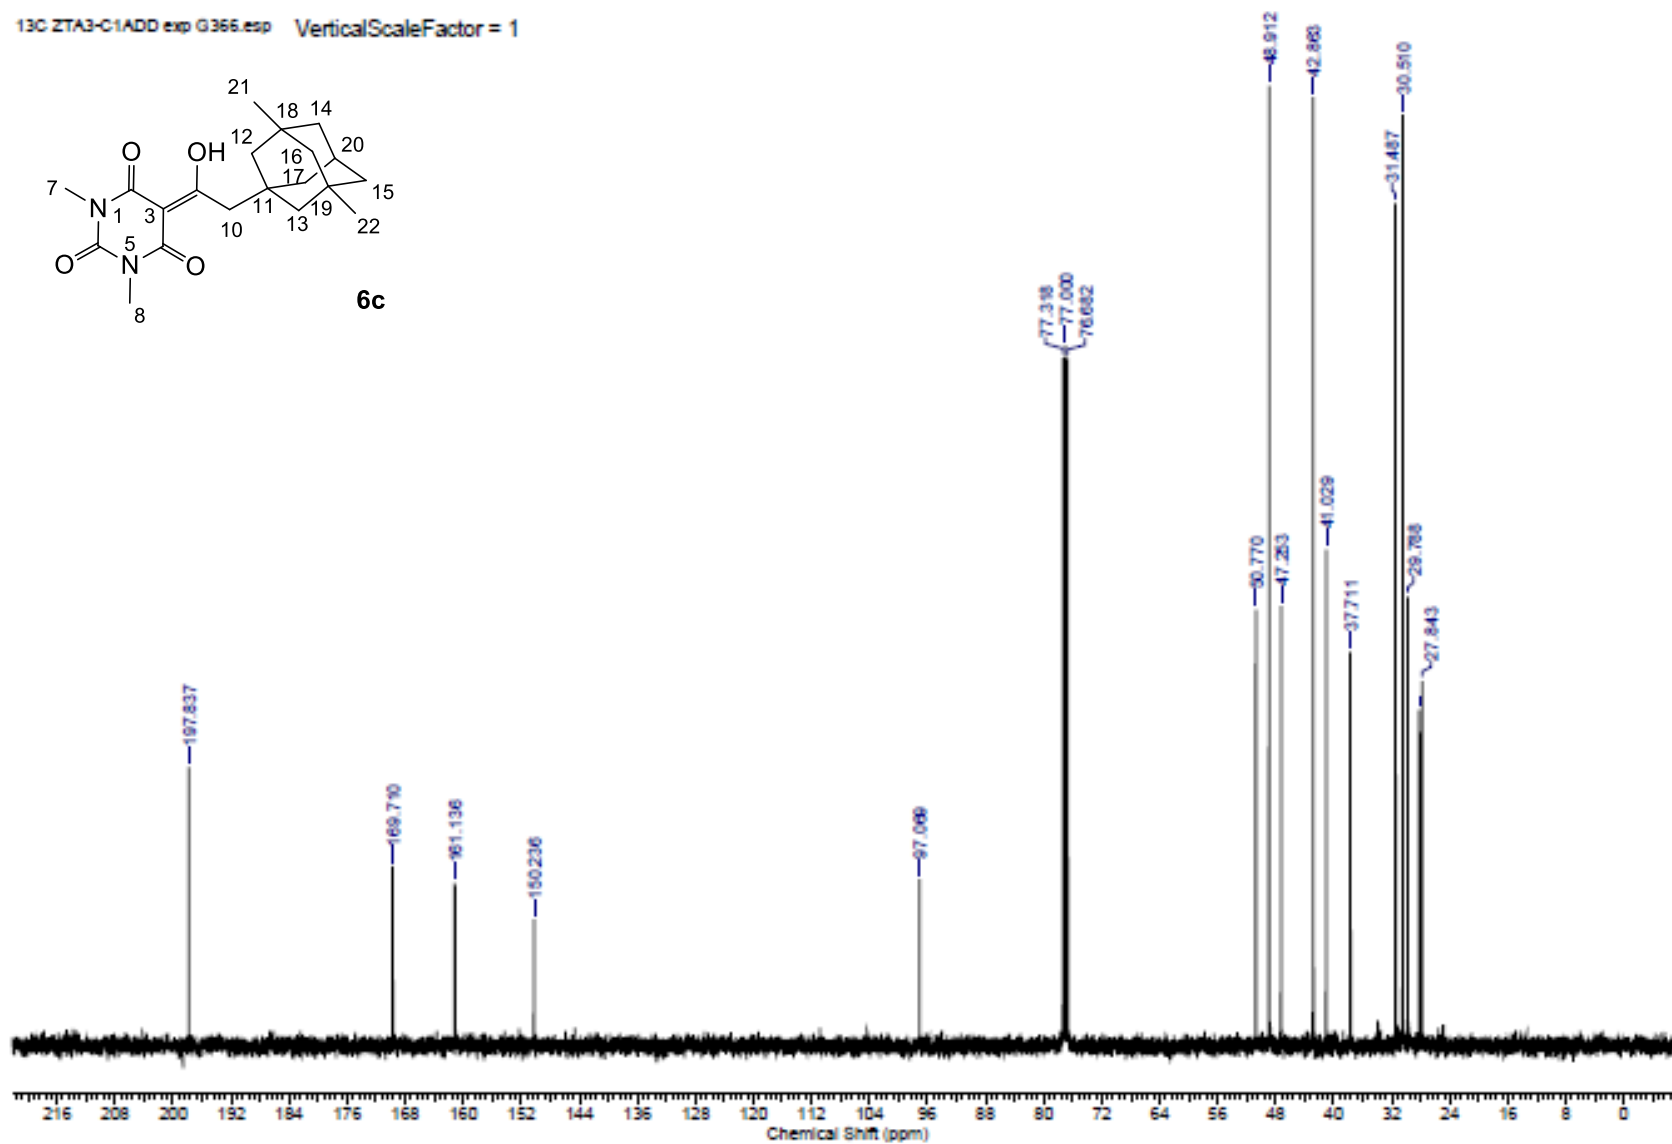

1H Z3-C2AD exp G503.exp

VerticalScaleFactor = 1

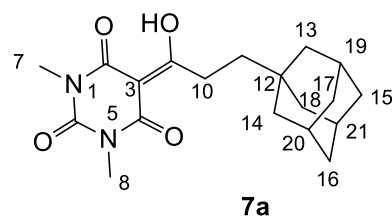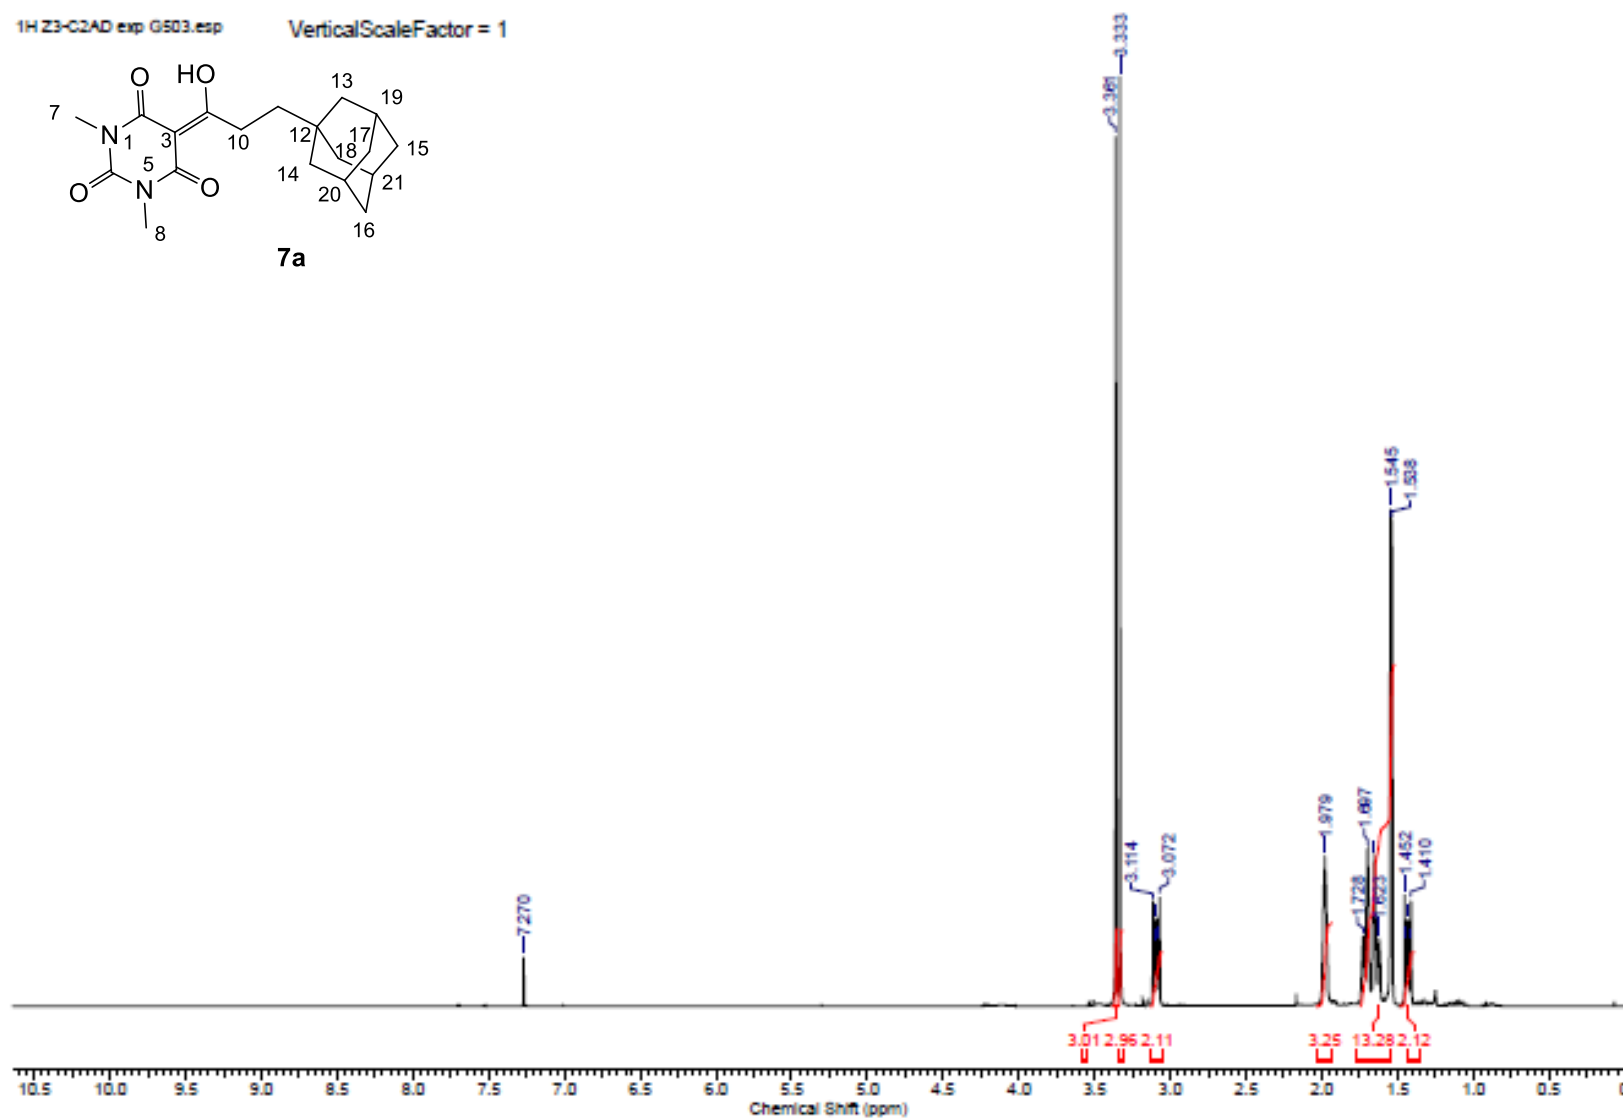

13C Z3-C24D exp 0503.esp

VerticalScaleFactor = 1

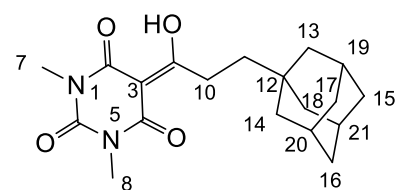

7a

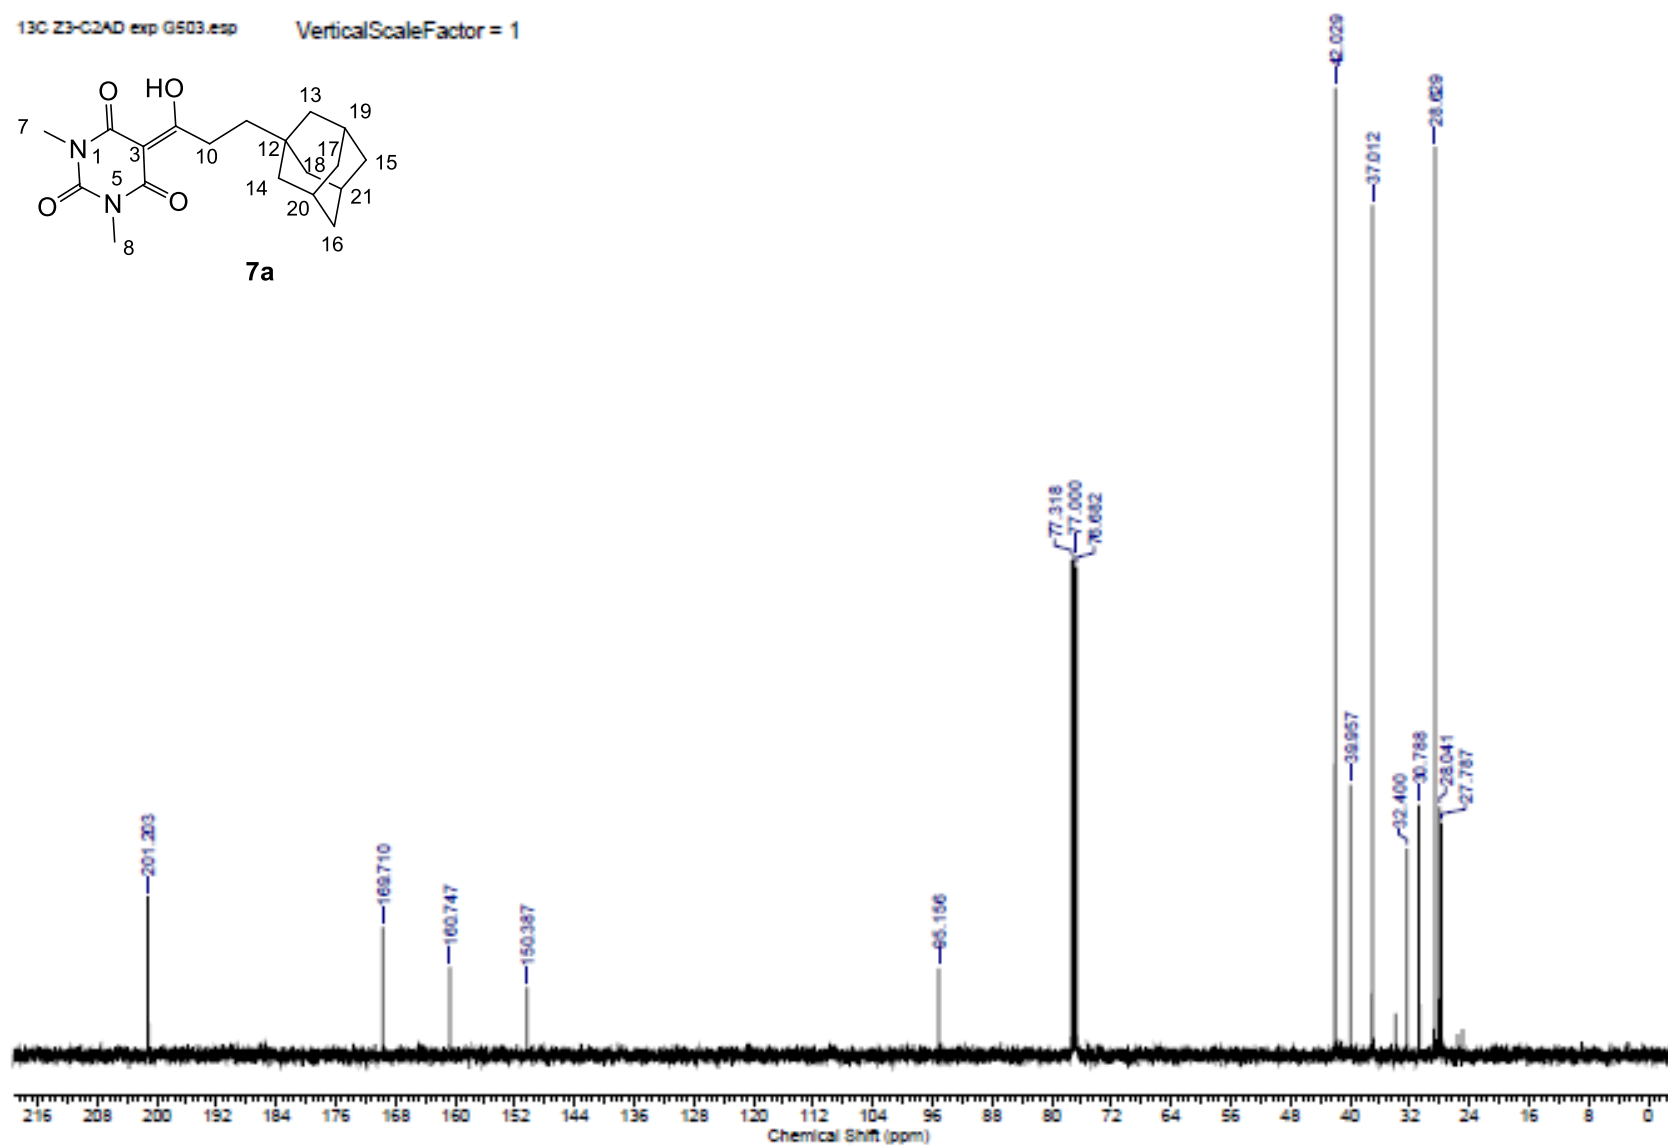

1H Z9-C2AD exp G579.esp

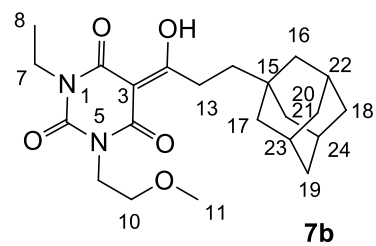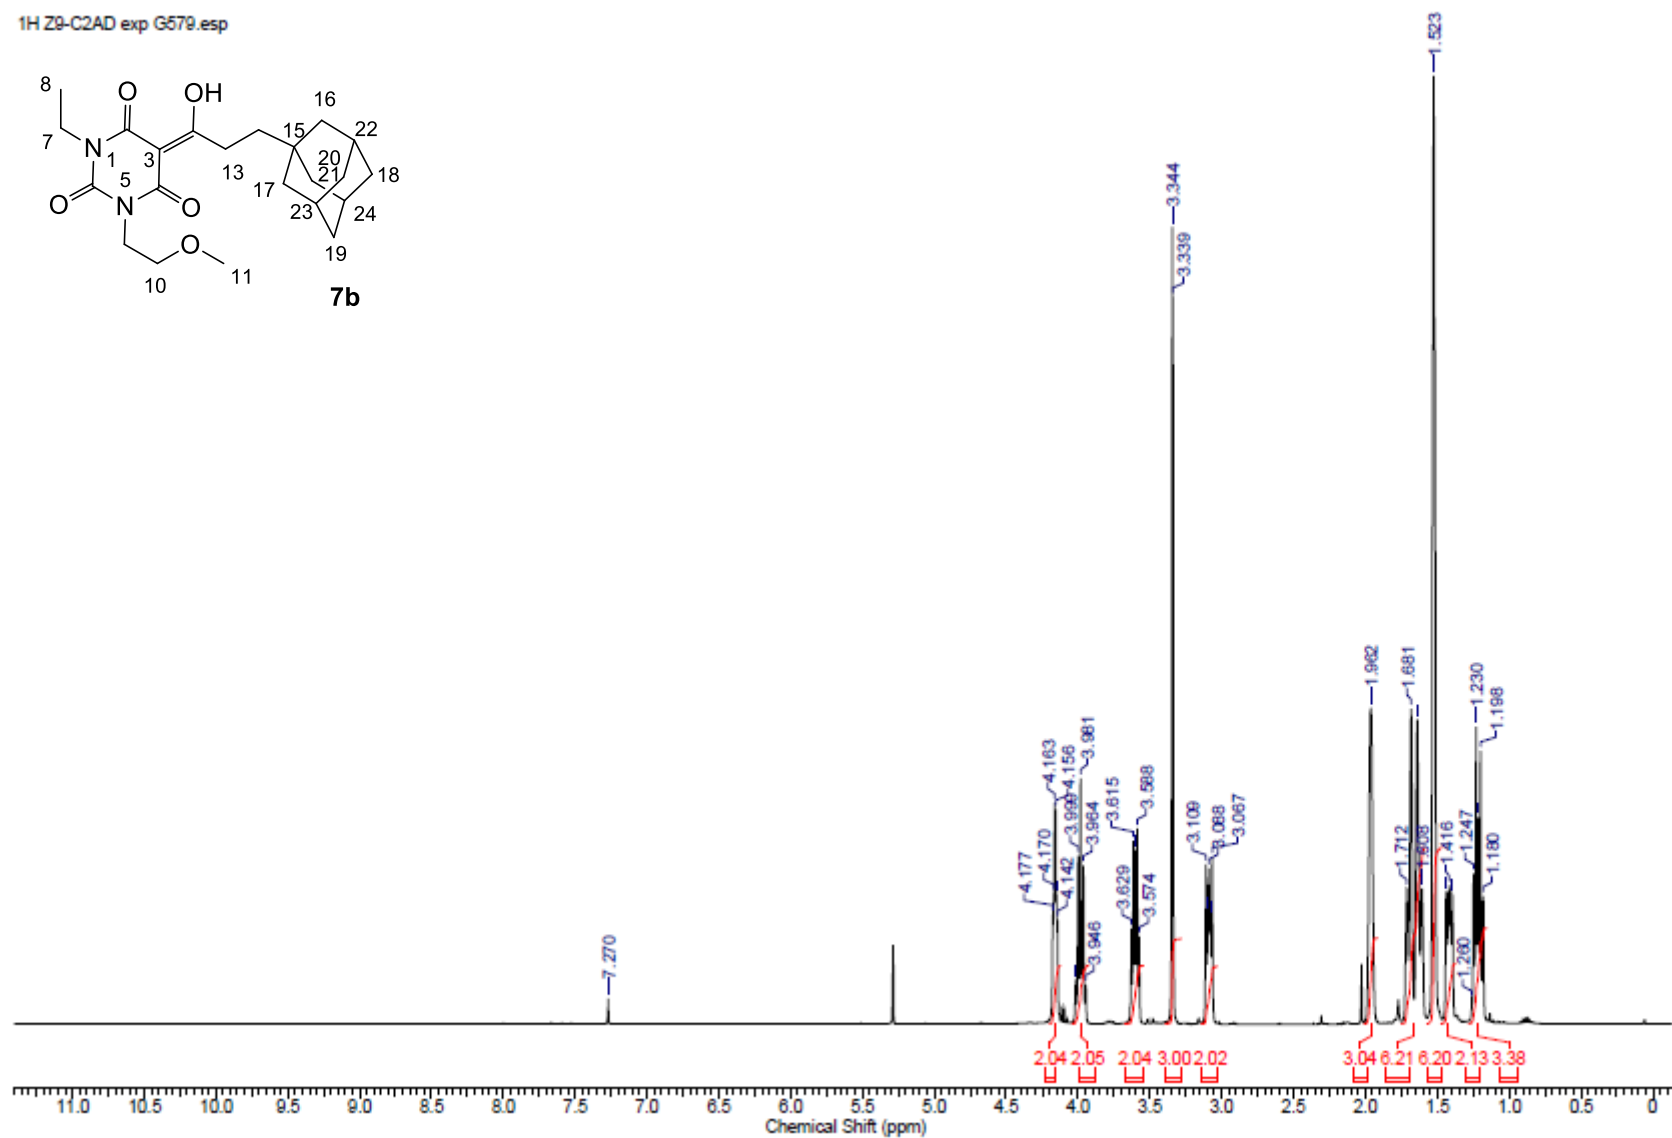



13C Z9-C2AD exp G579.esp

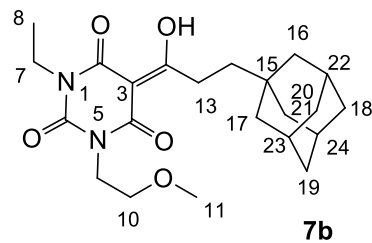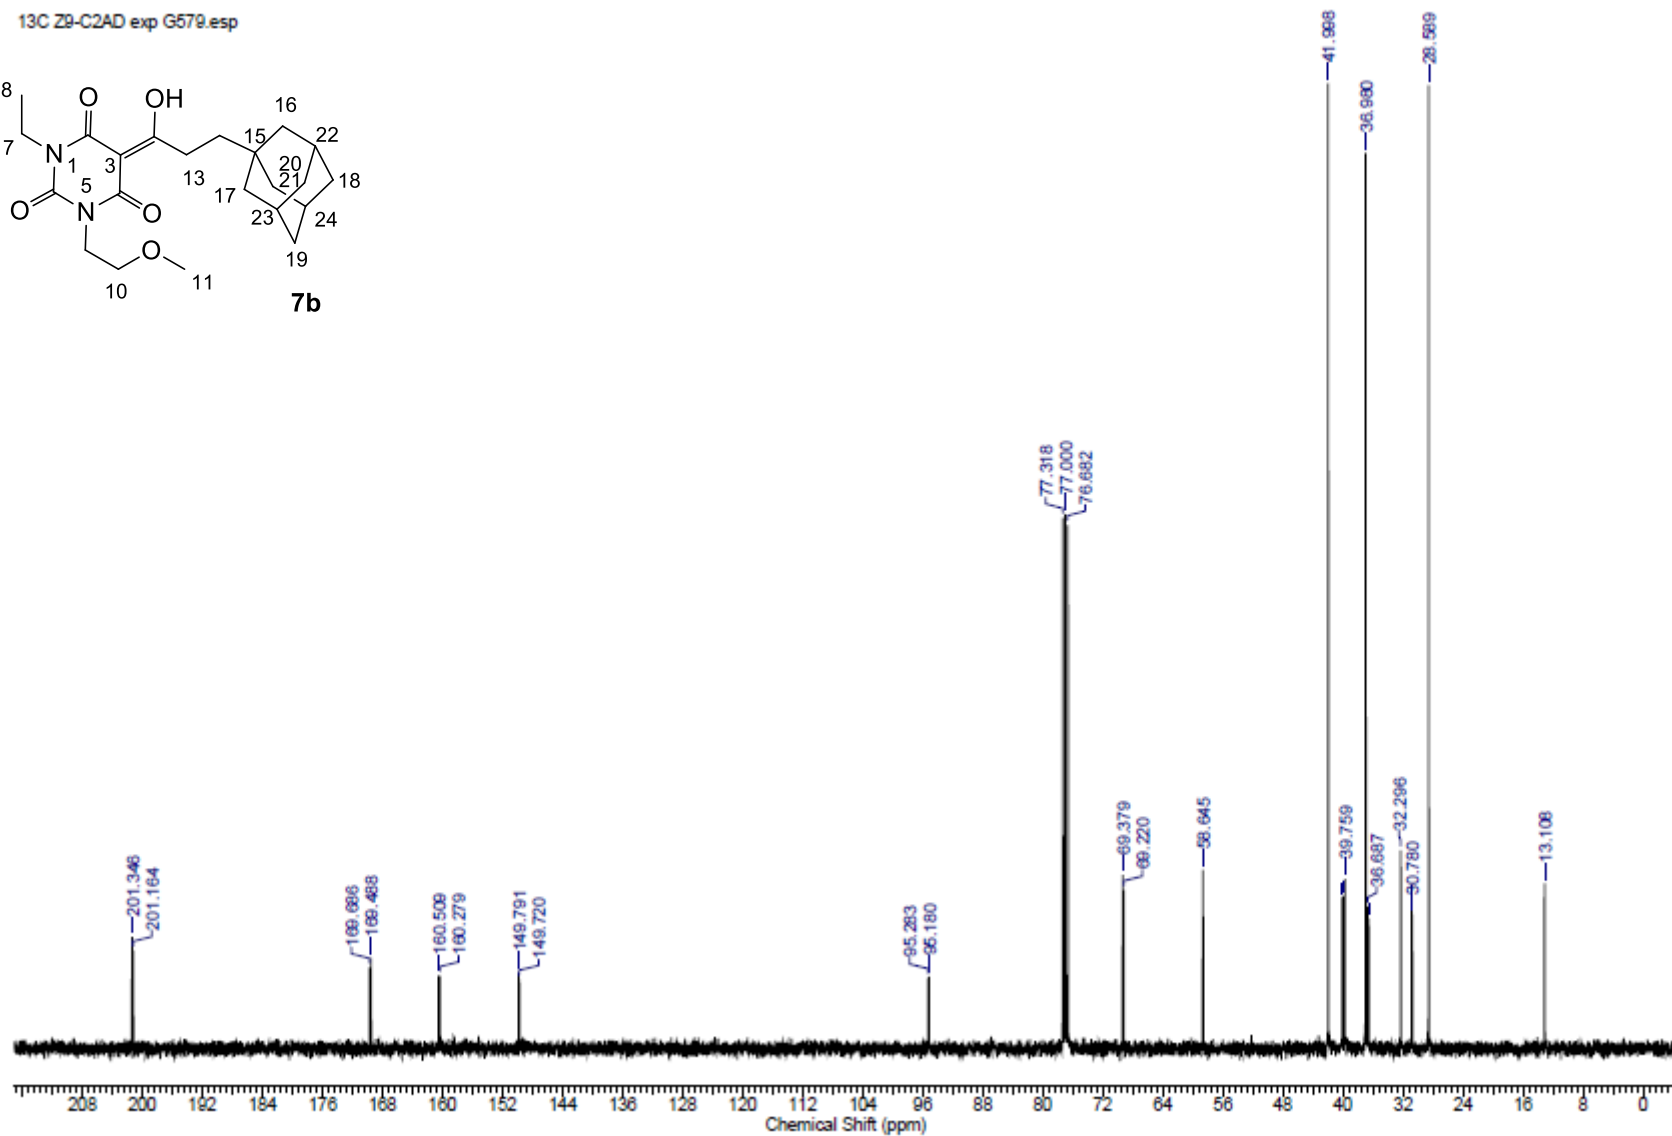

1H Z3-C2CY exp 0515.esp

VerticalScaleFactor = 1

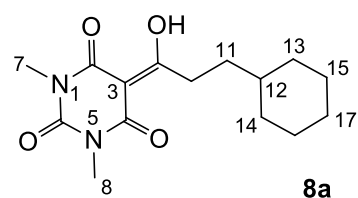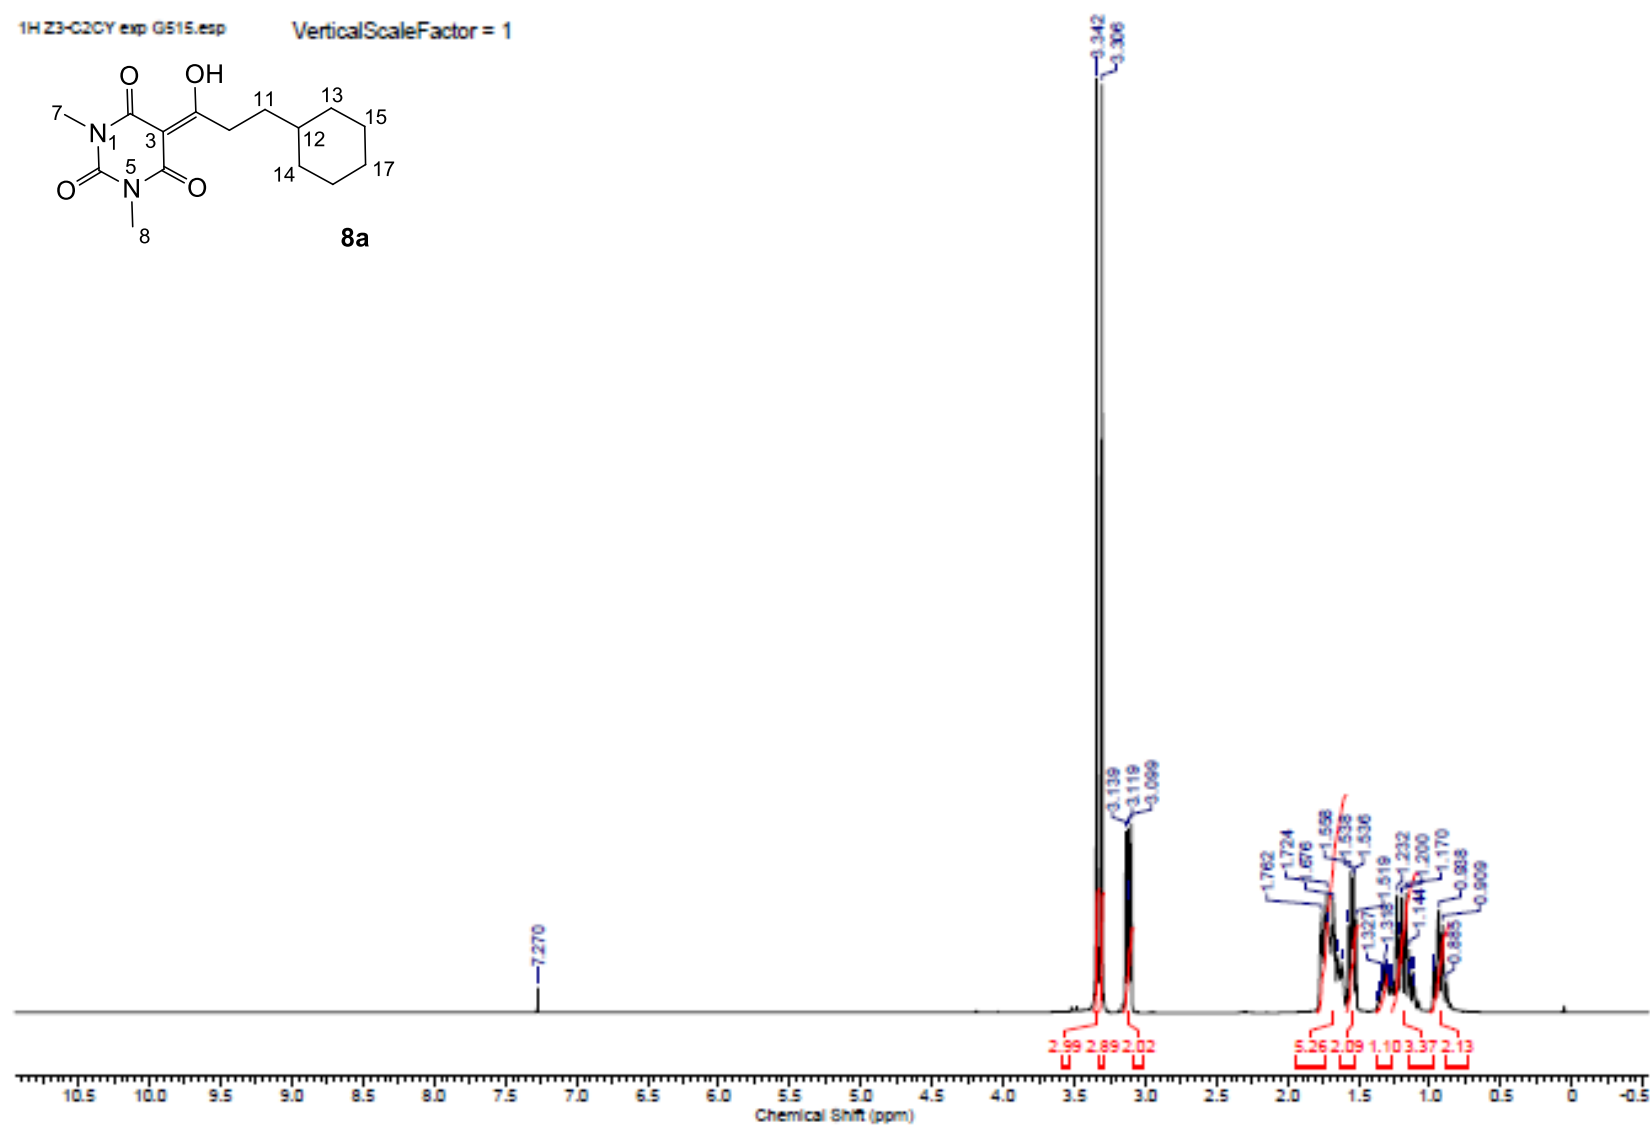

13C Z3-C2CY exp 0515.esp

VerticalScaleFactor = 1

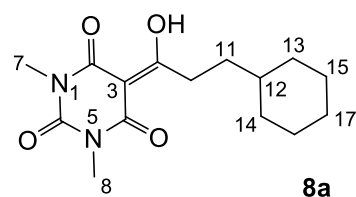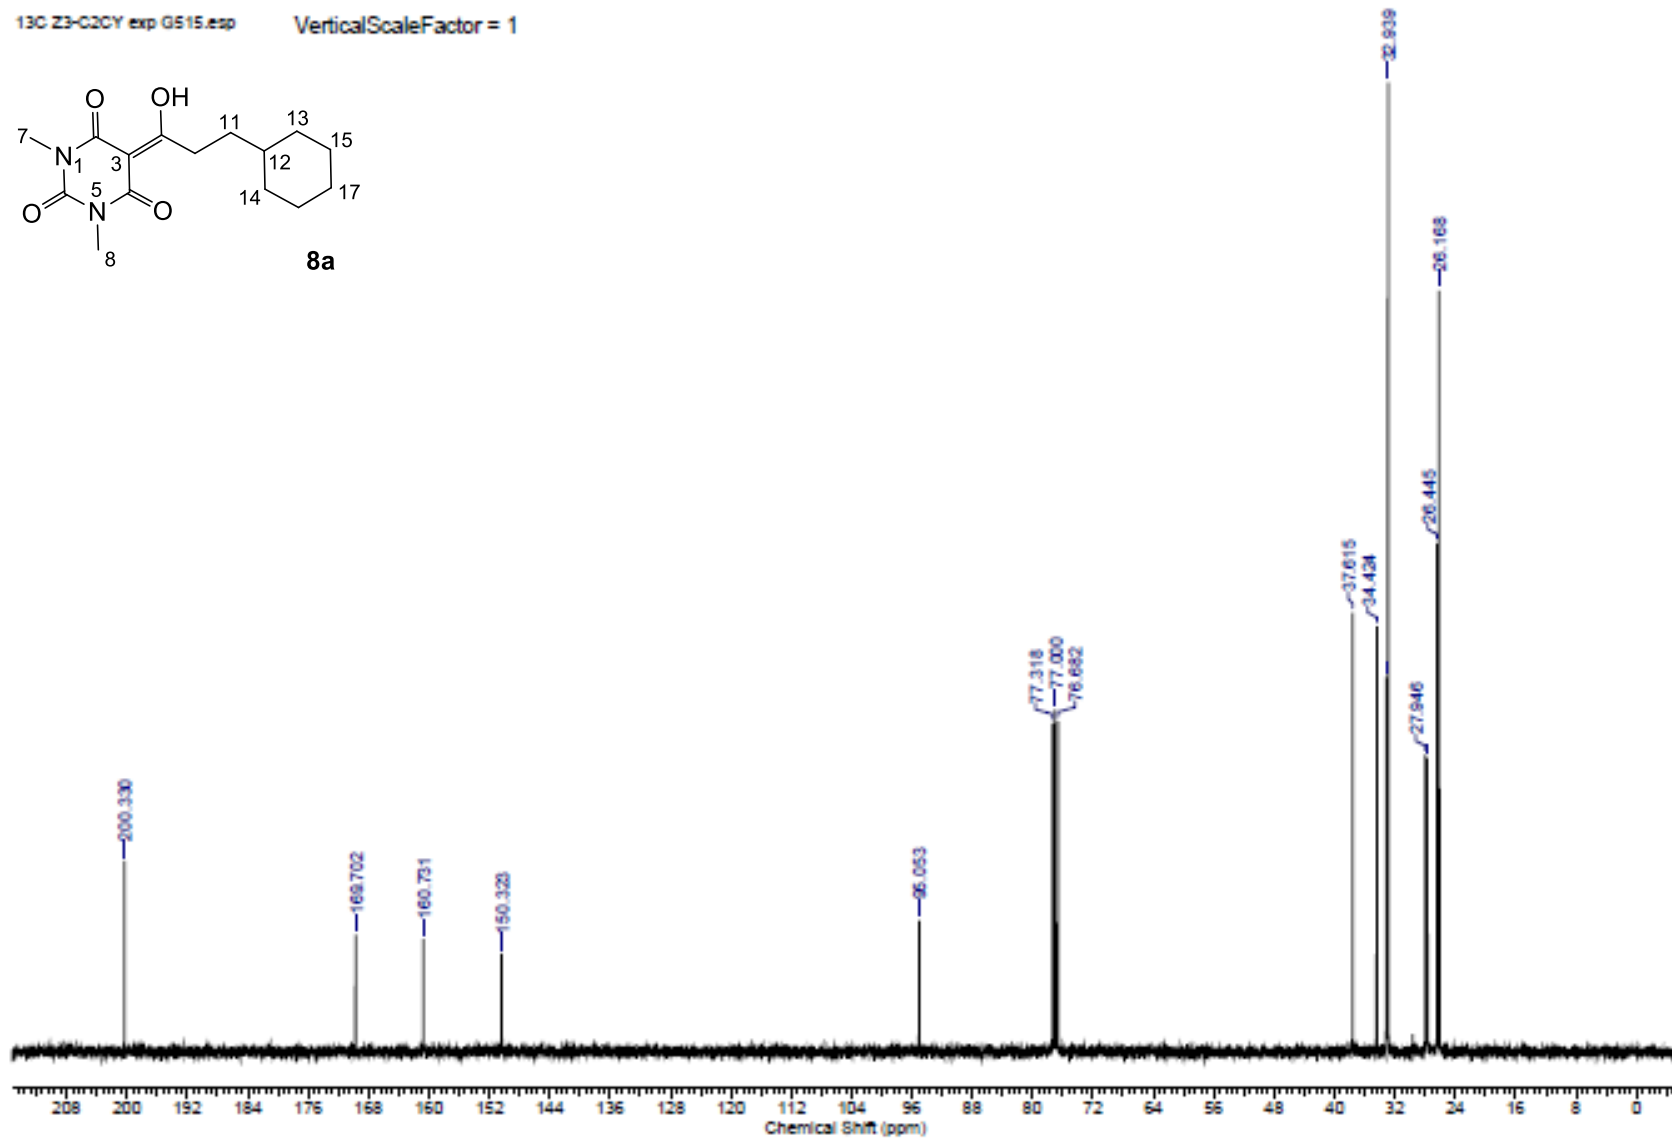

1H Z3-C3CY exp G516.esf

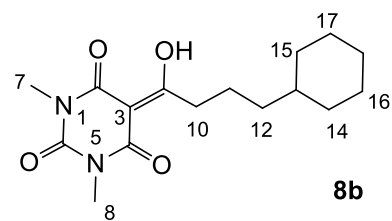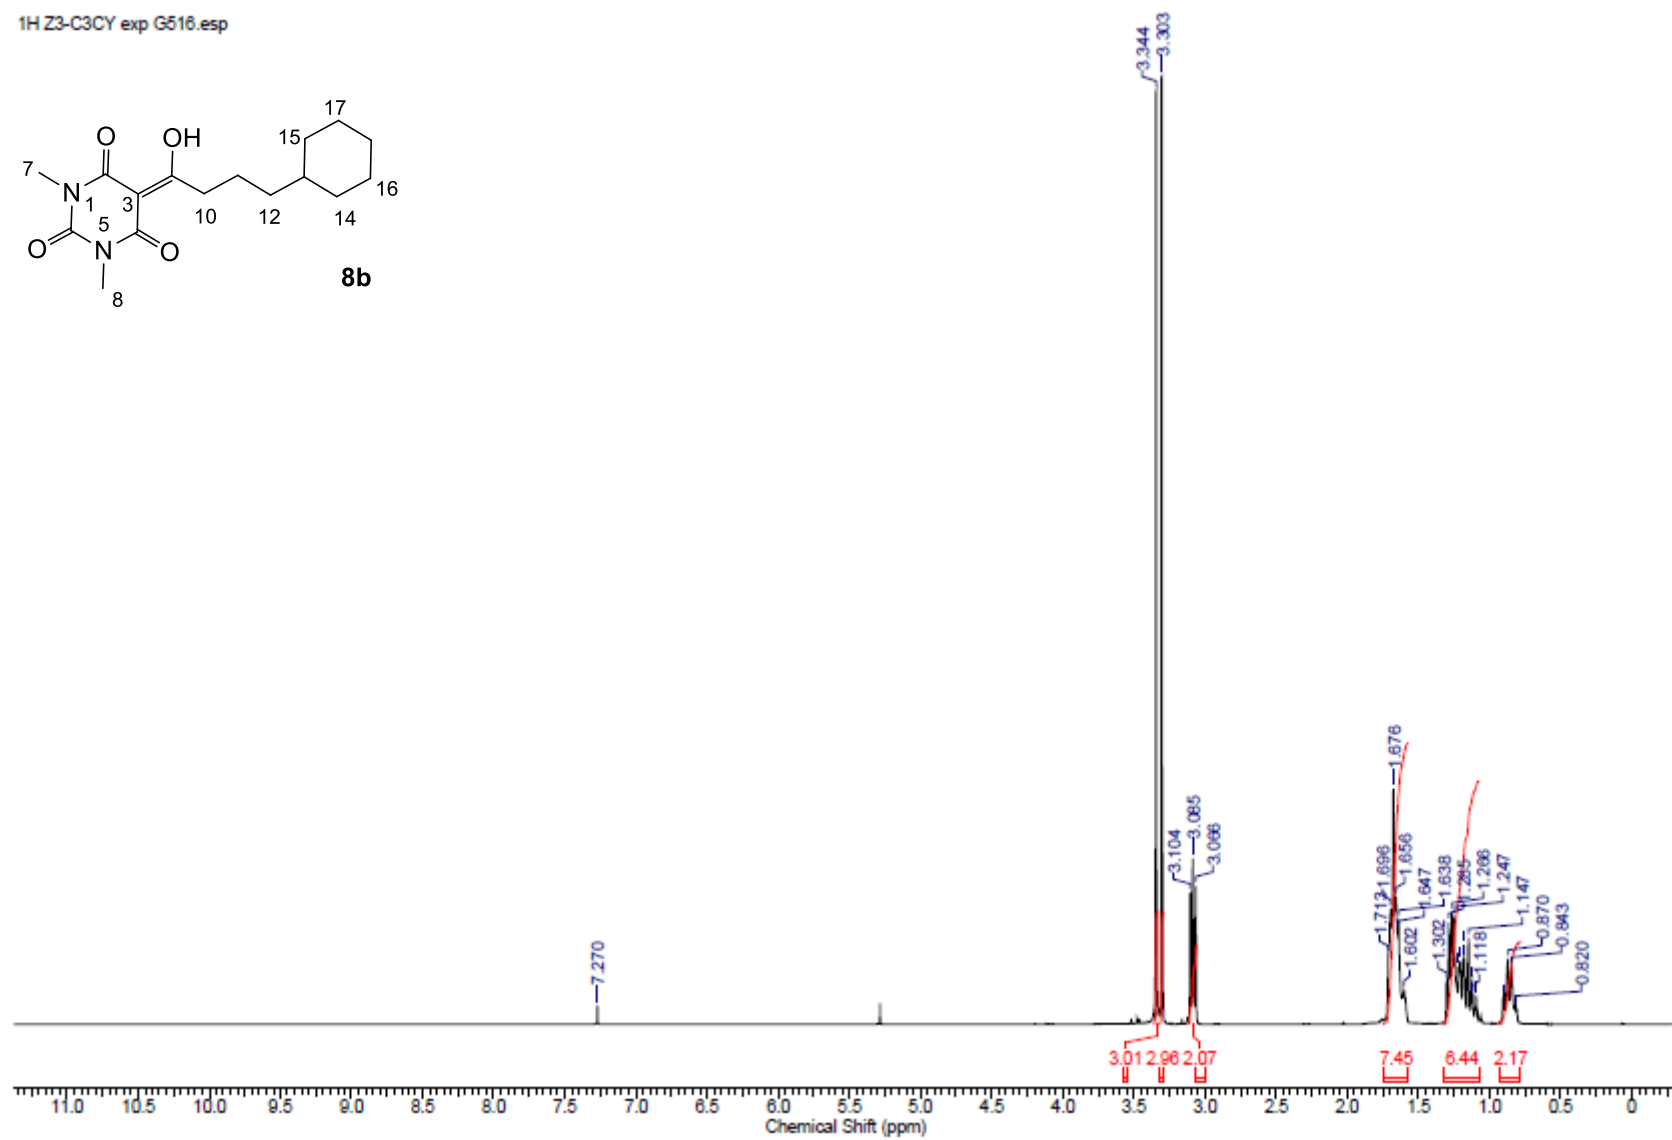

13C Z3-C3CY exp G516.esp

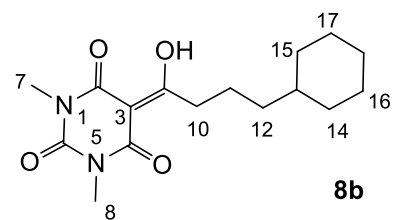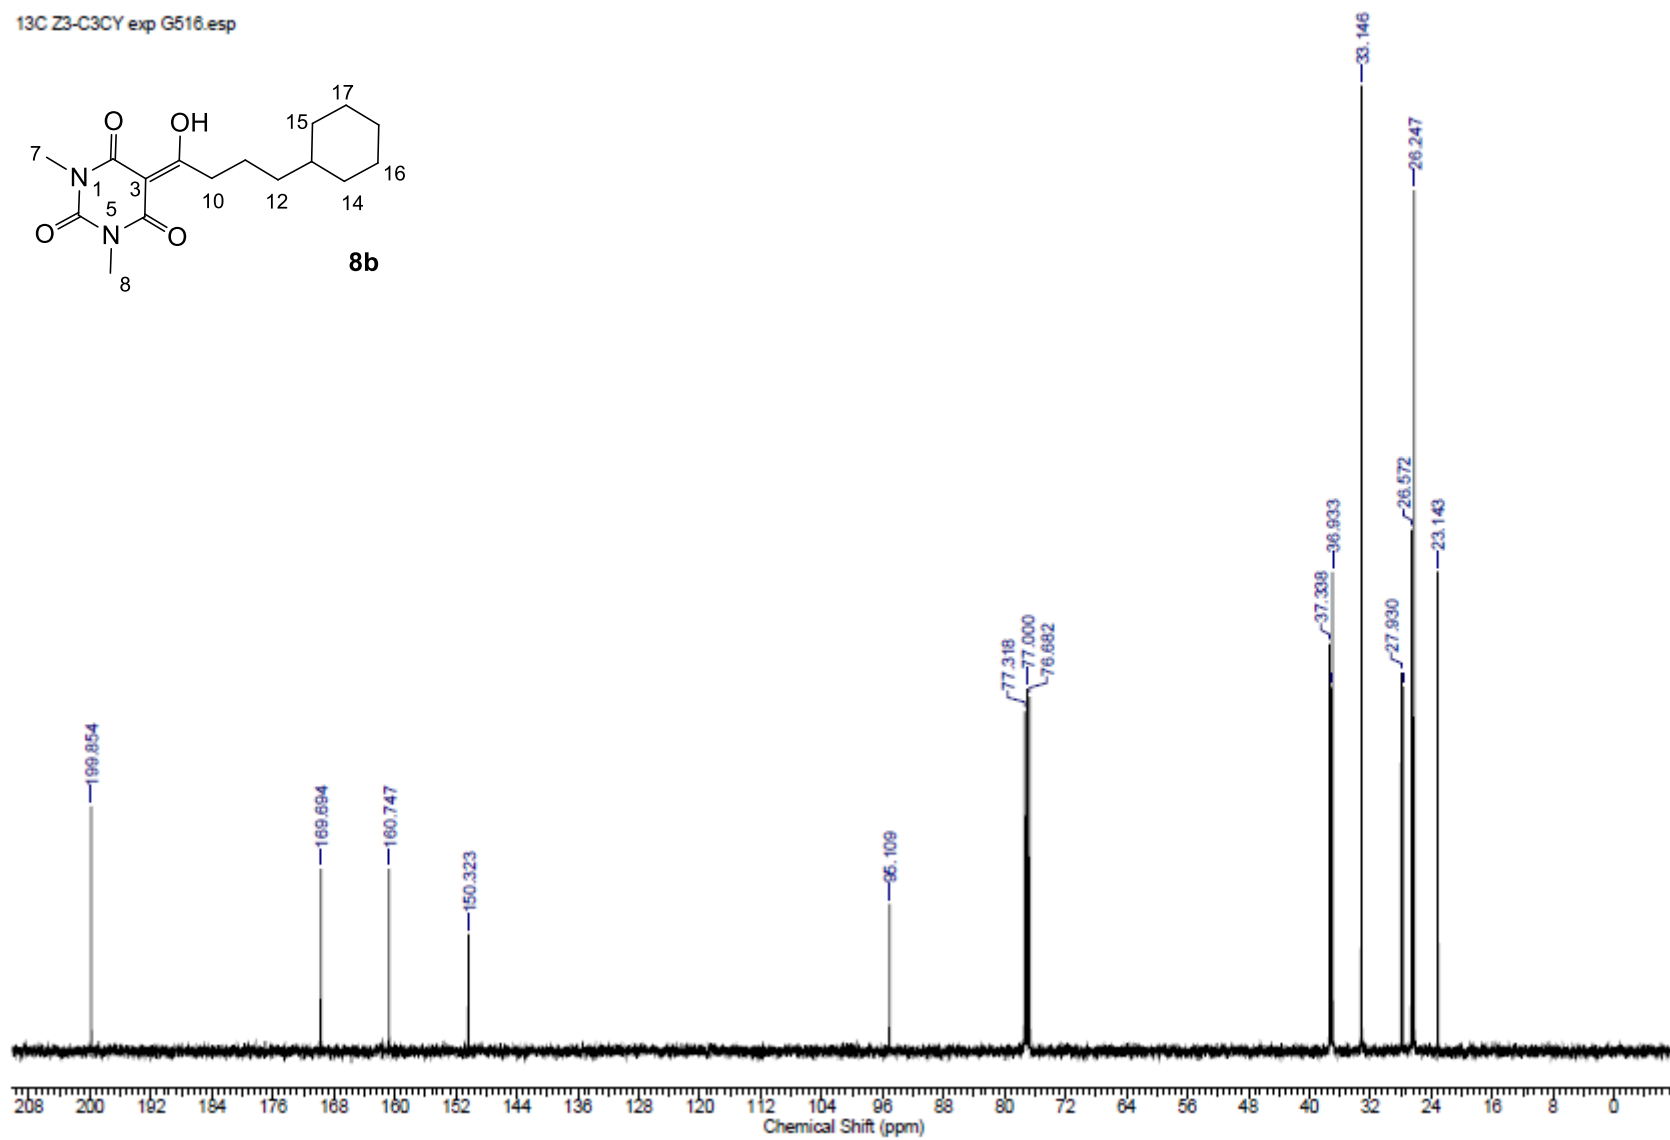

VerticalScaleFactor = 1

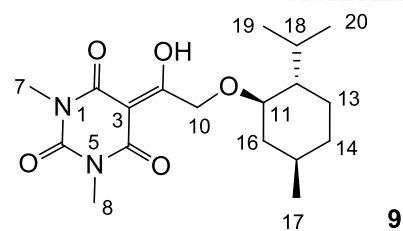

9

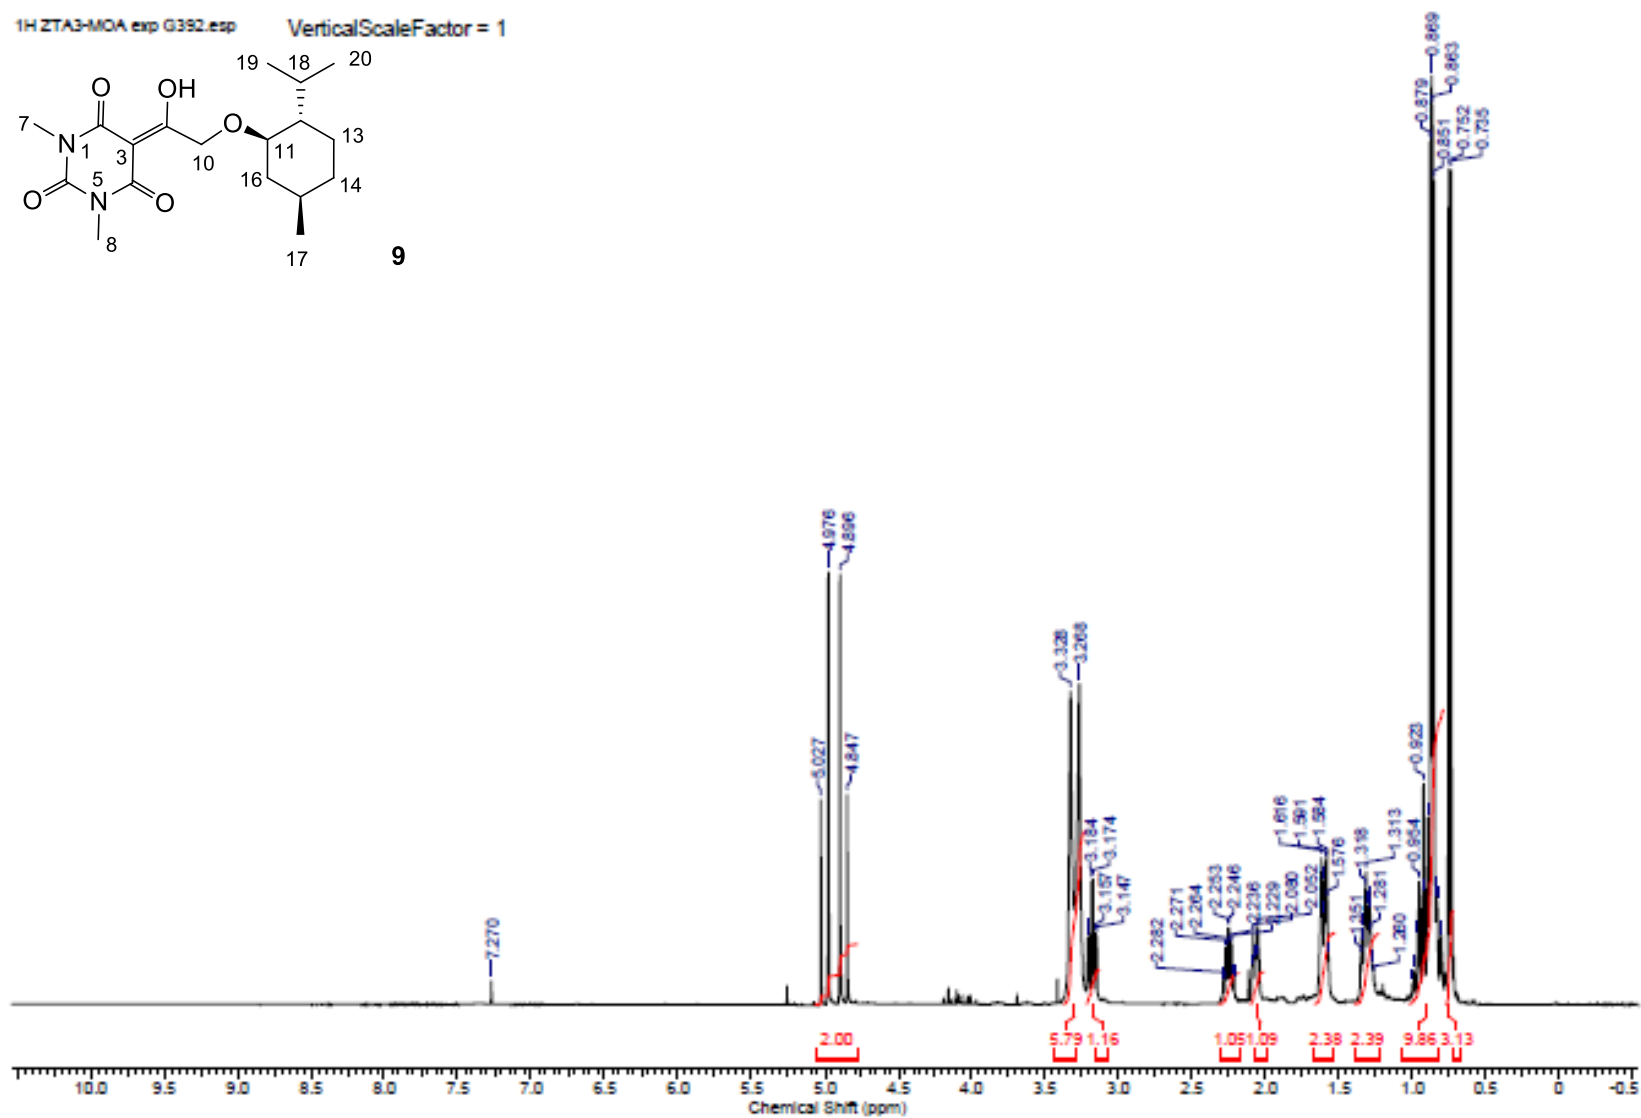

13C ZTA3-MOA exp G392.exp

VerticalScaleFactor = 1

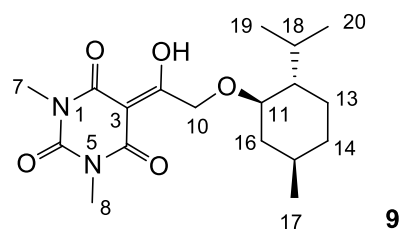

9

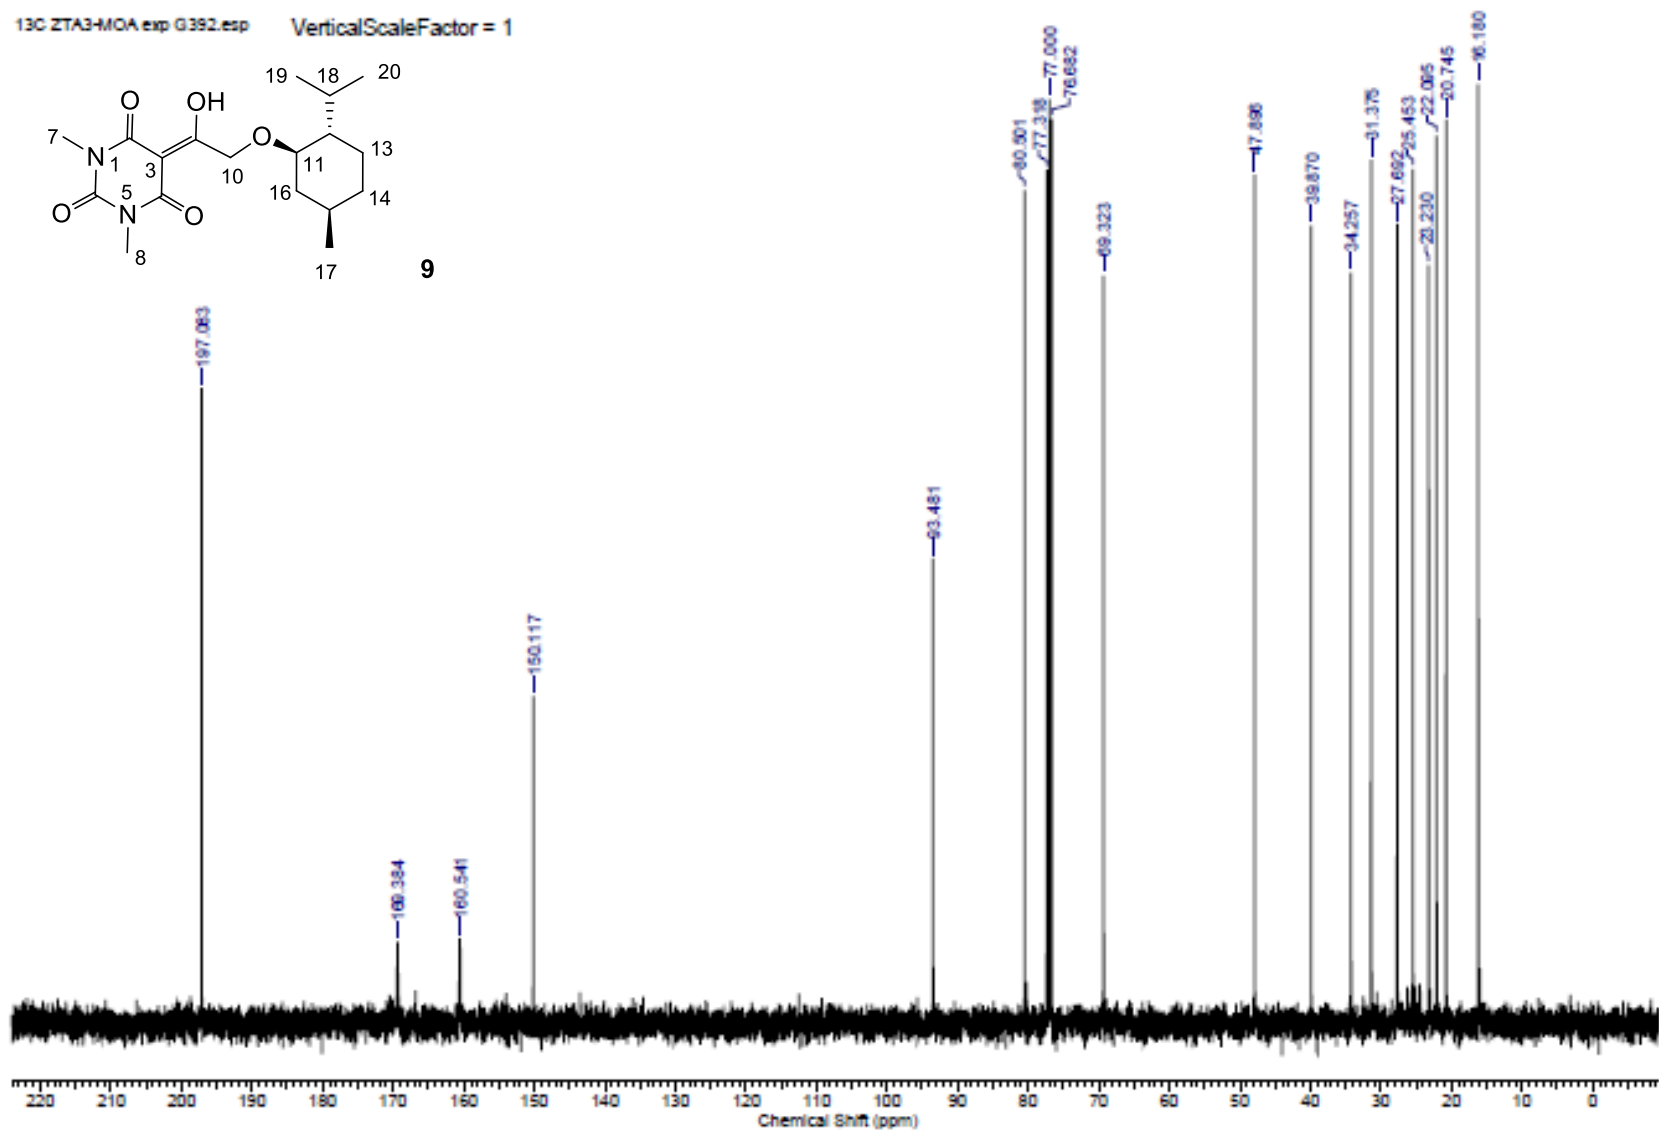

1H Z3-C3C1 exp G433.esp

VerticalScaleFactor = 1

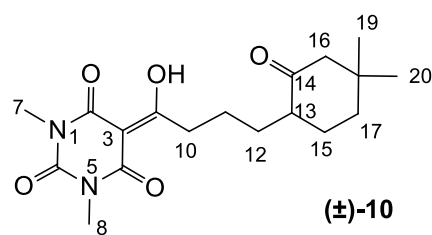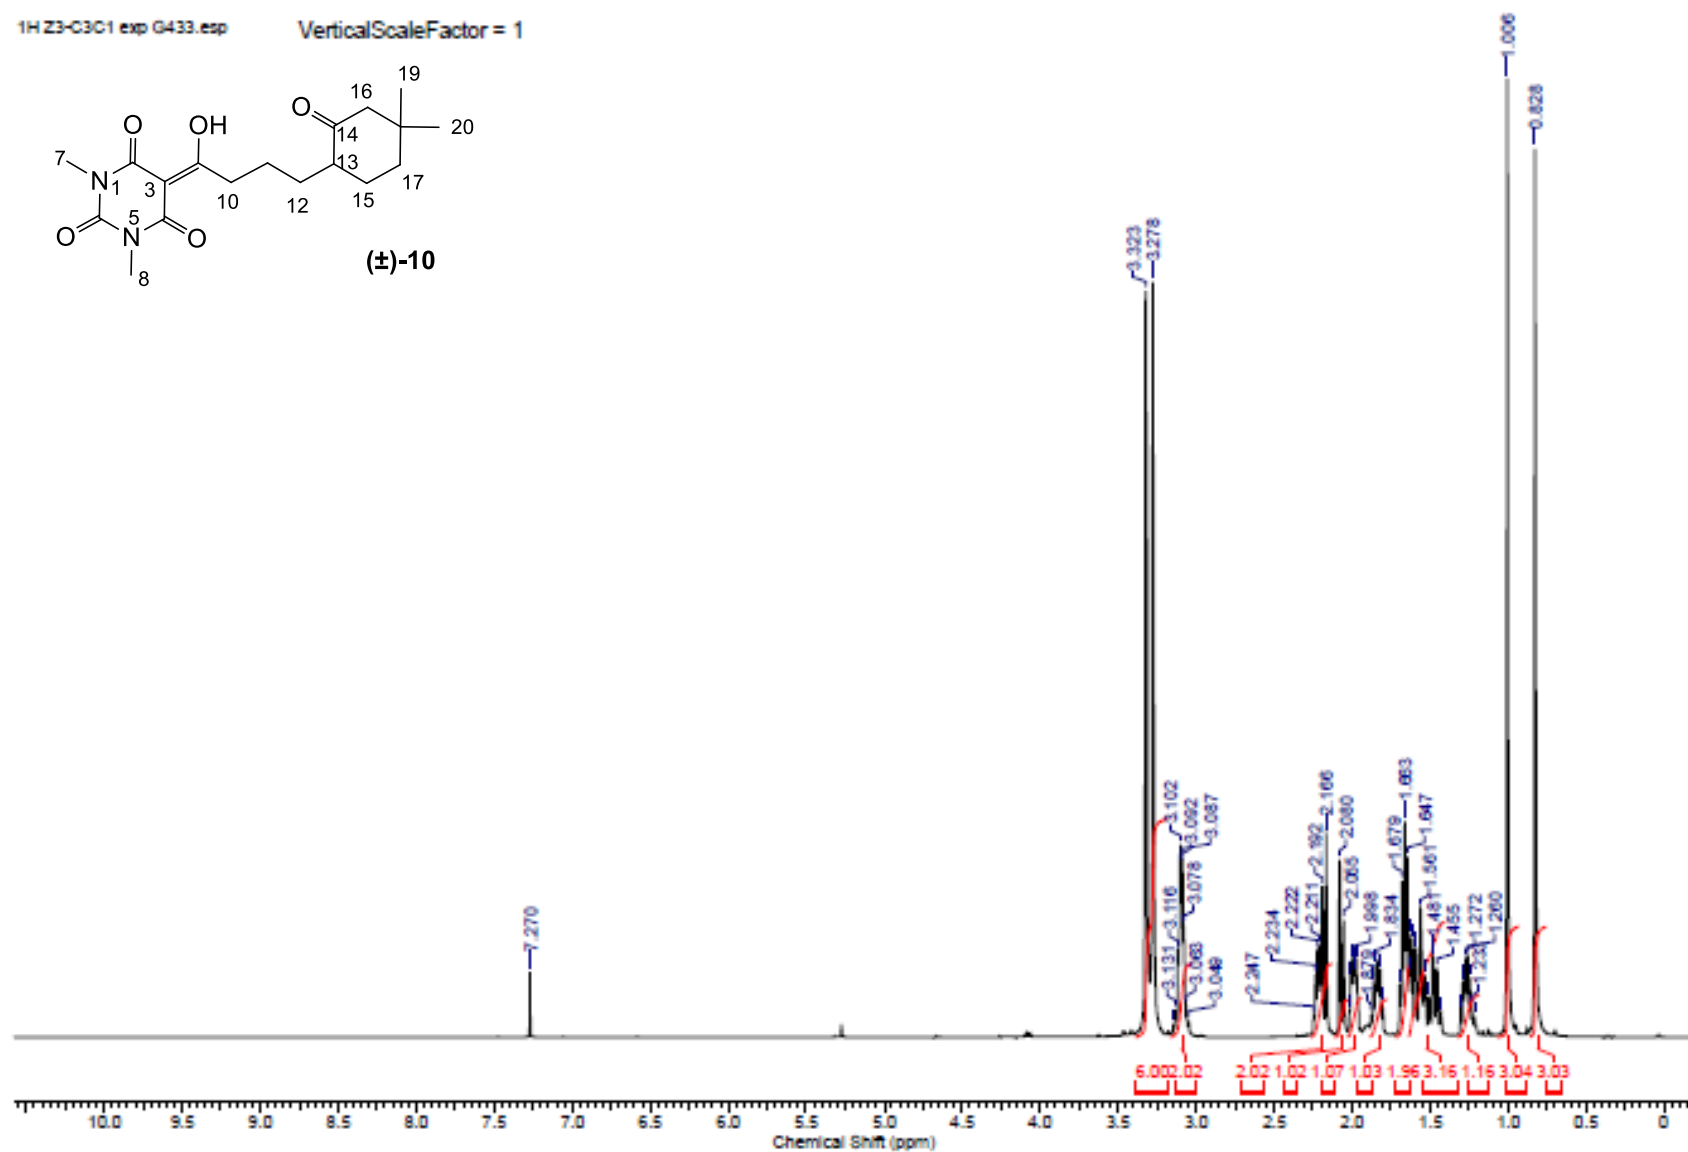



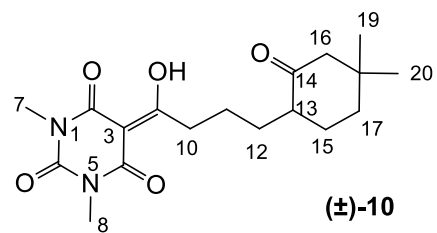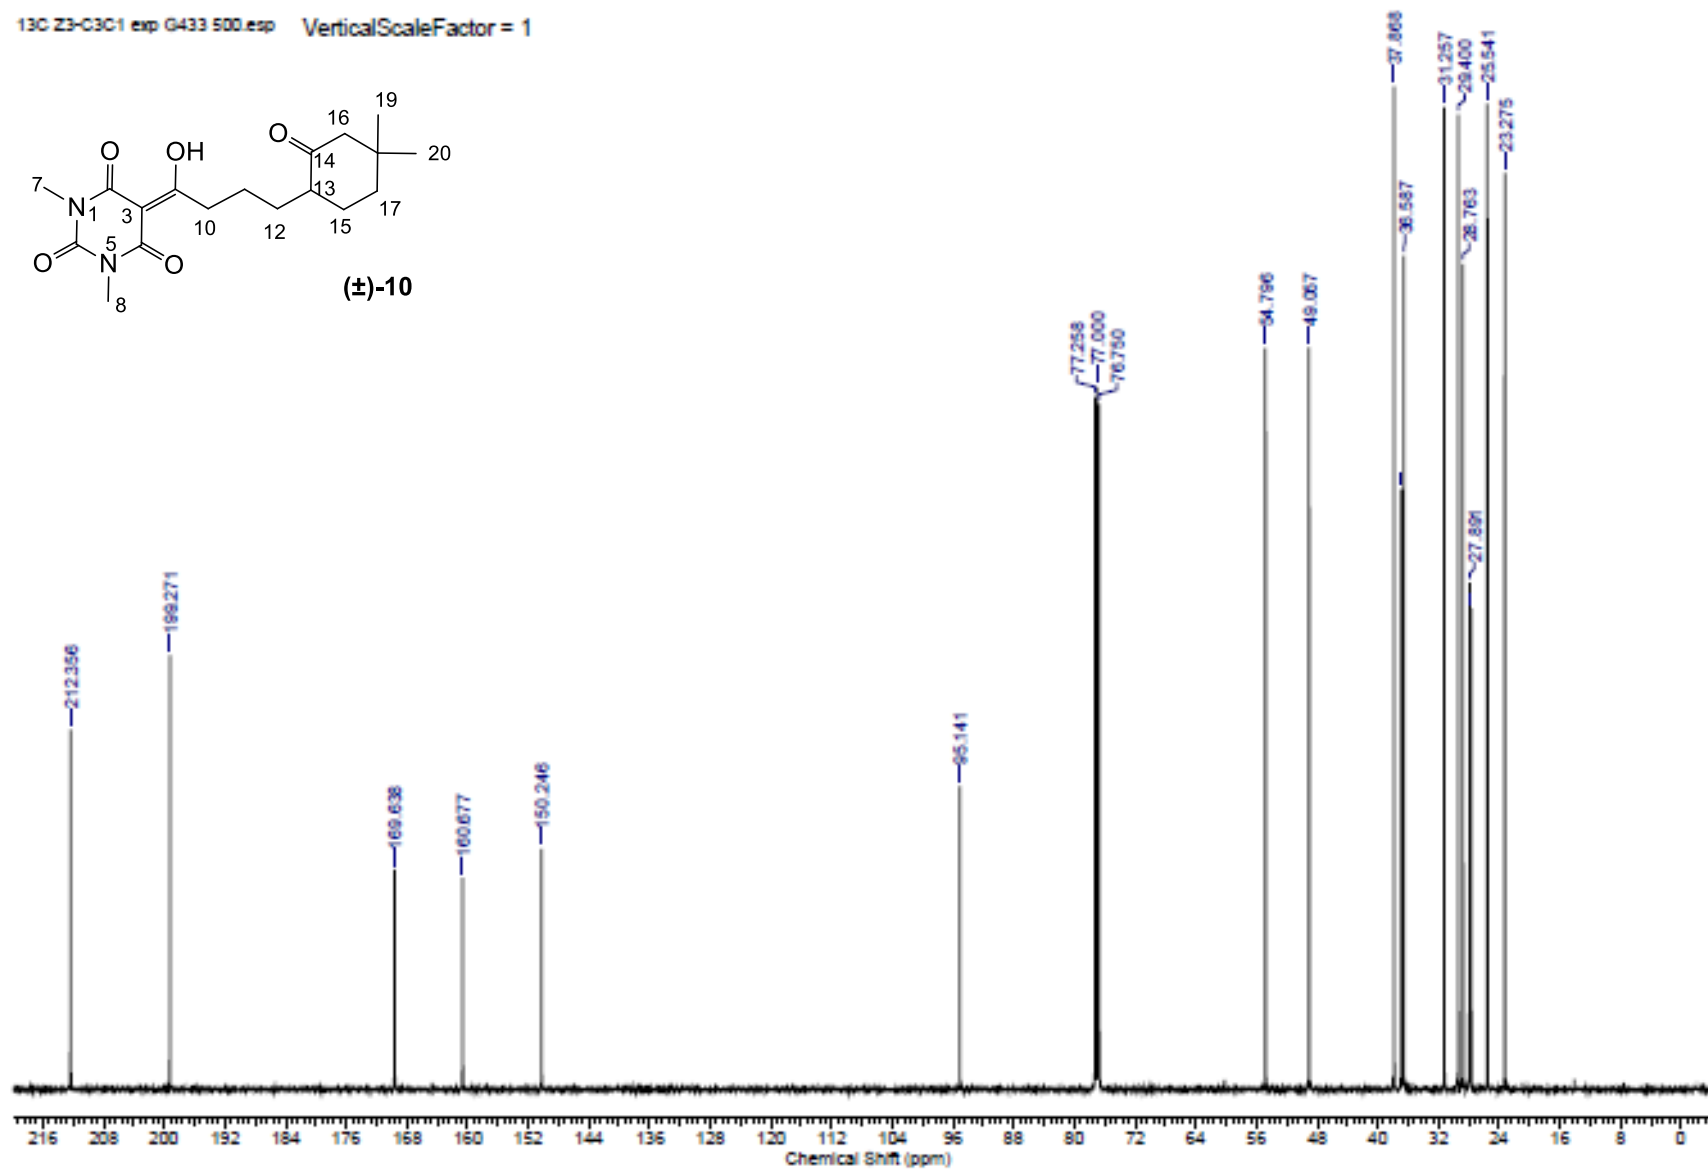

1H Z8-C1P exp G568.esp

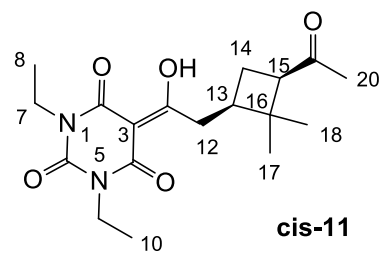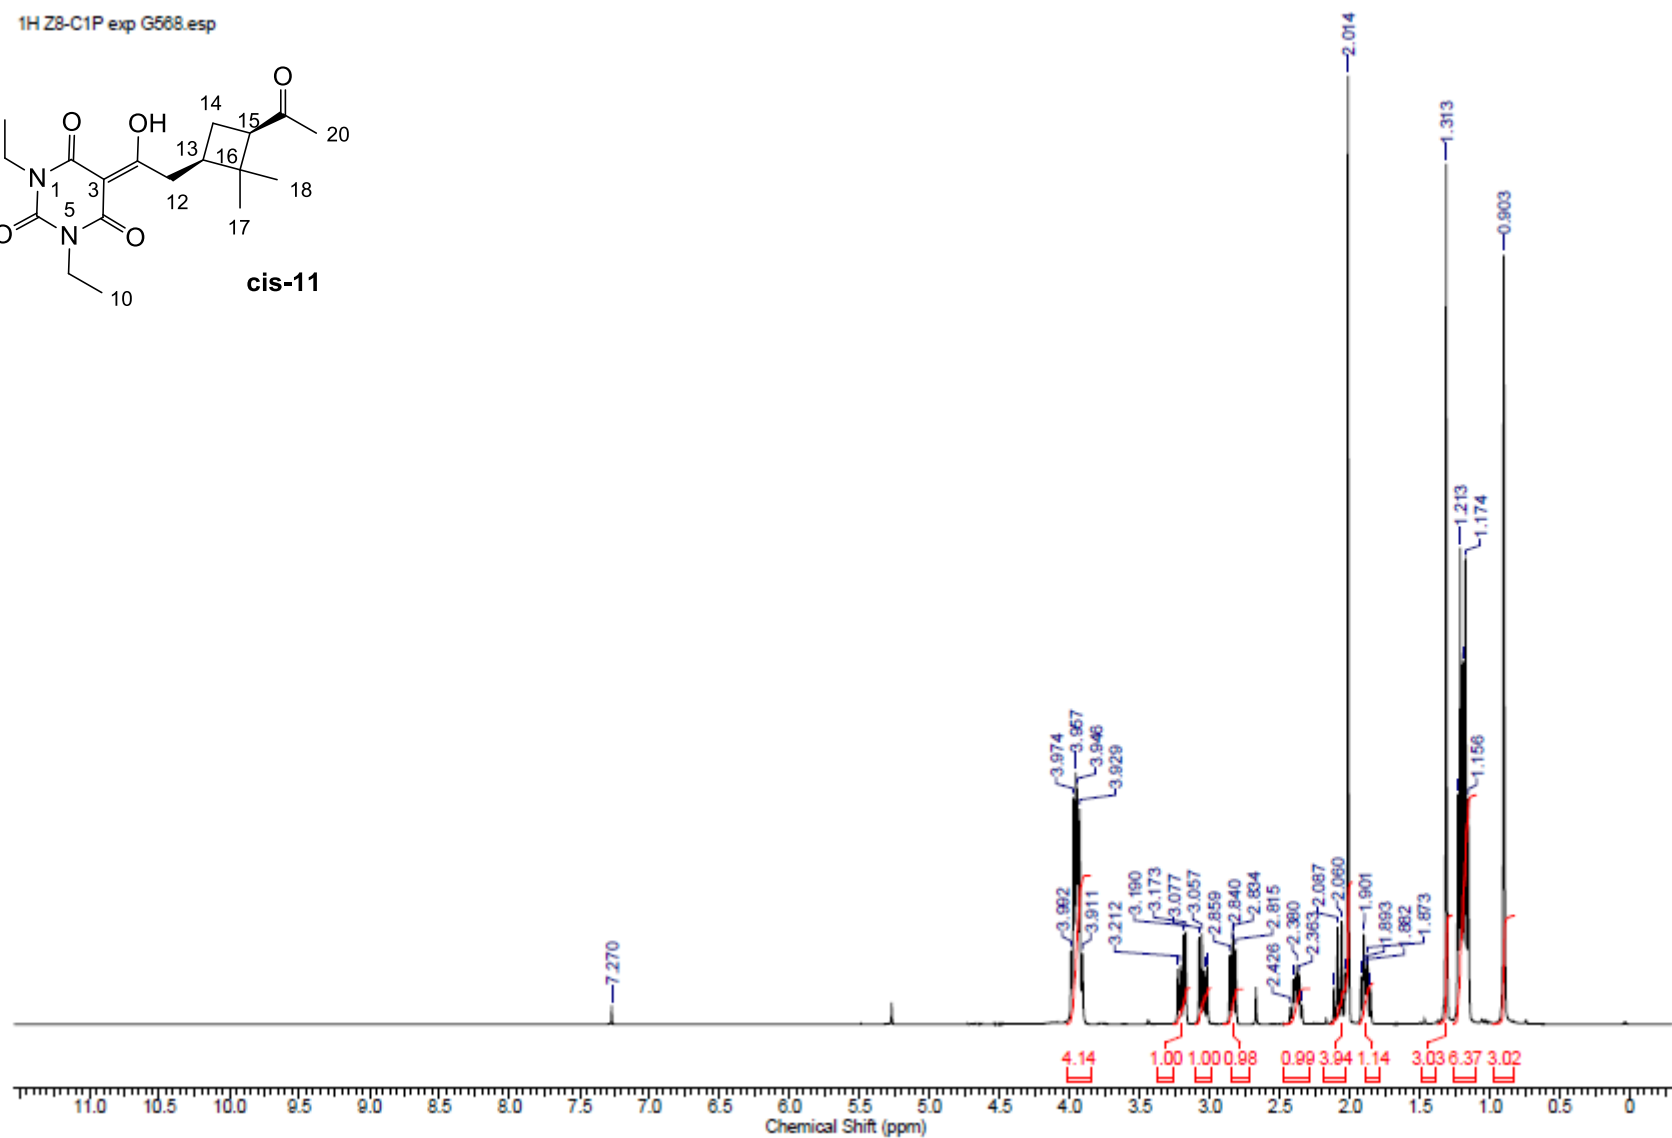

13c Z8-C1P exp G568.esp

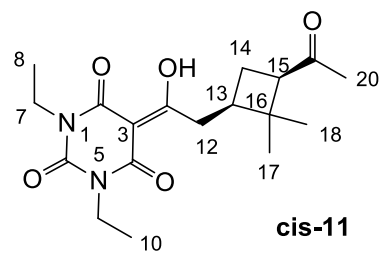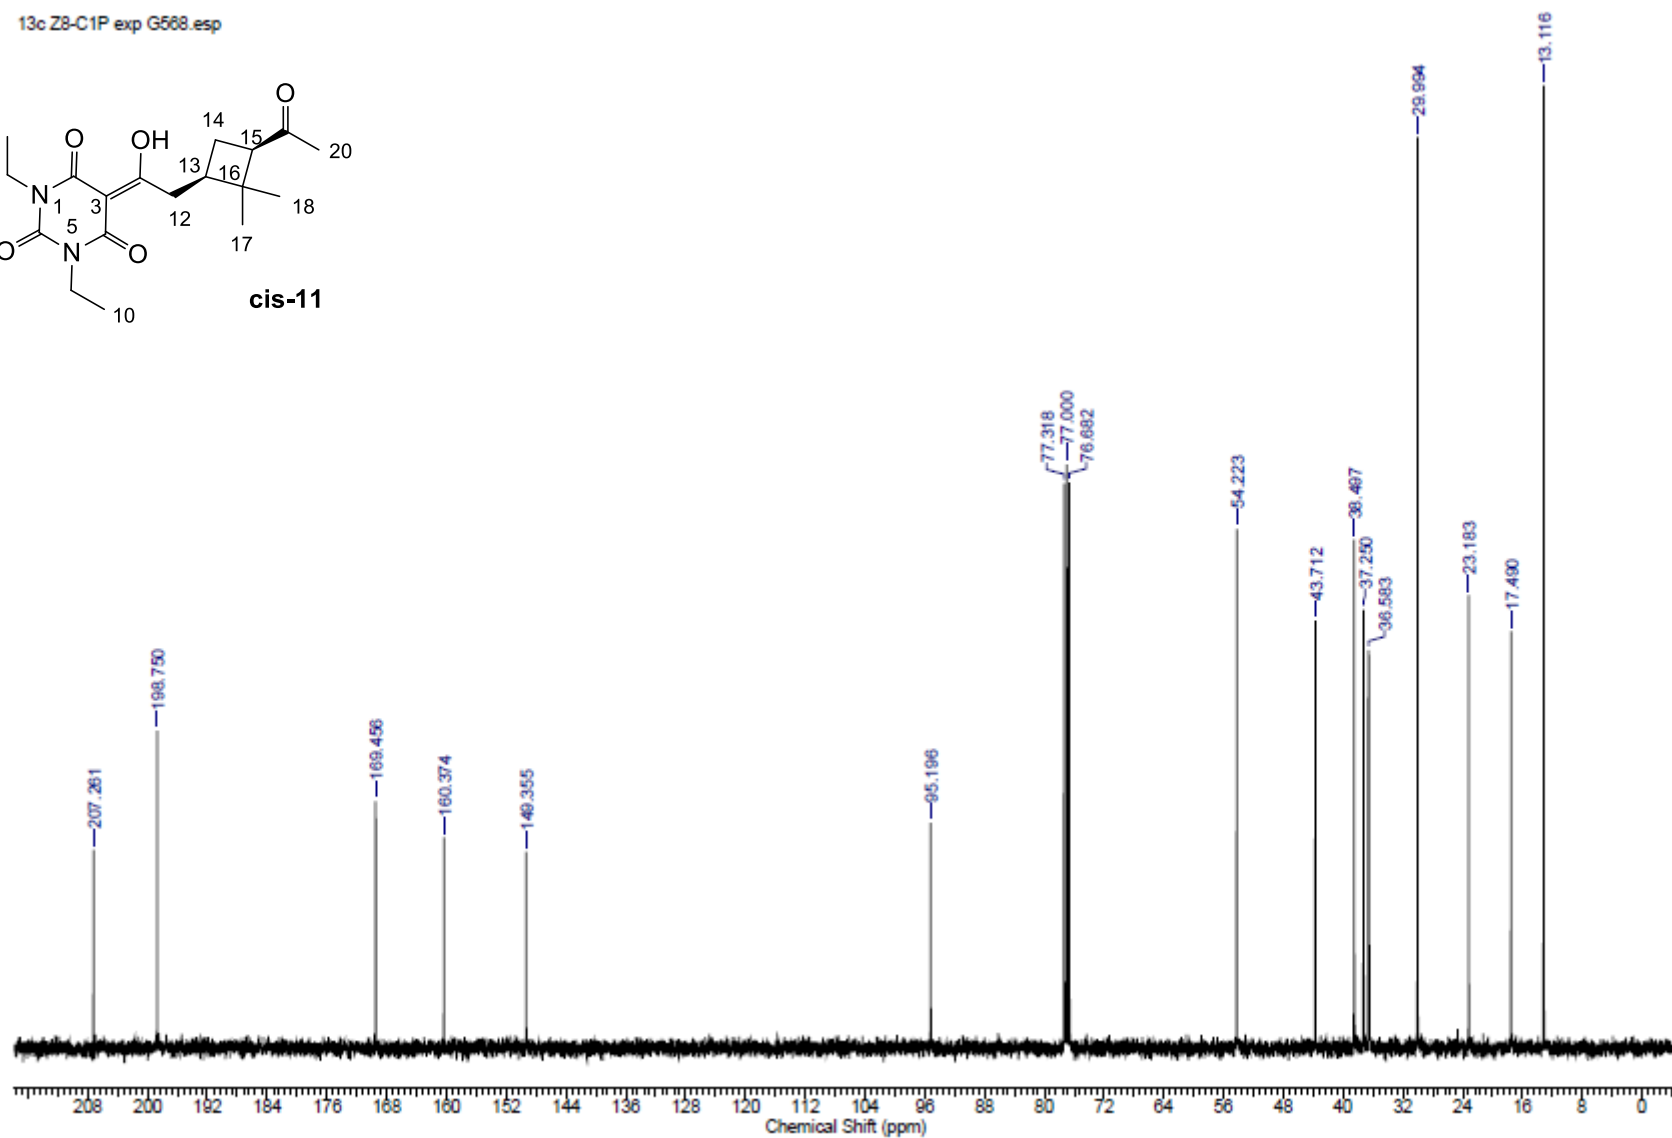

1H Z3-PY exp G475.esp

VerticalScaleFactor = 1

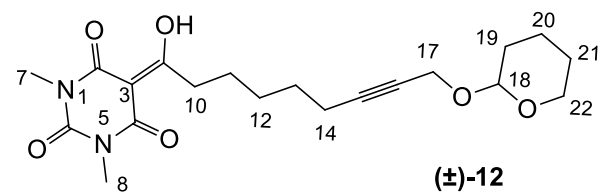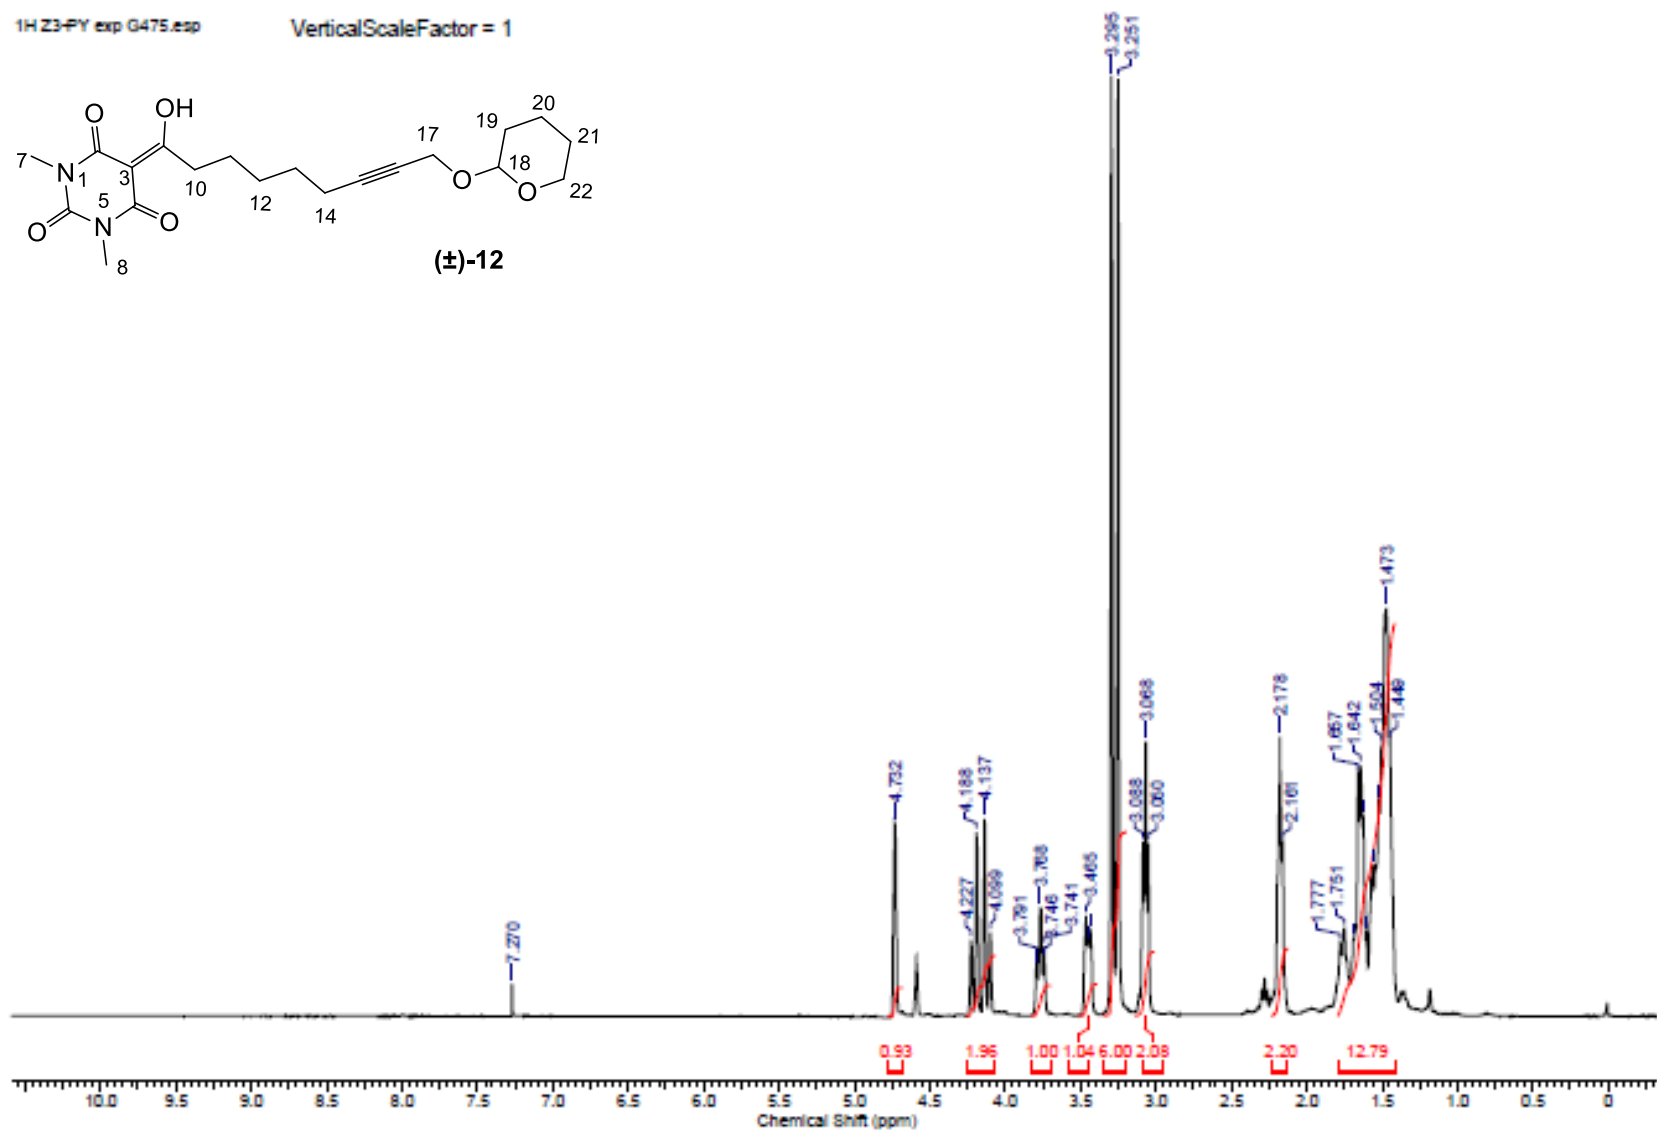

13C Z3-PY exp 0475.exp

VerticalScaleFactor = 1

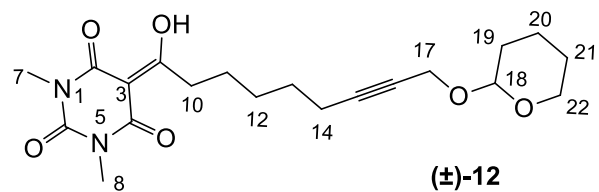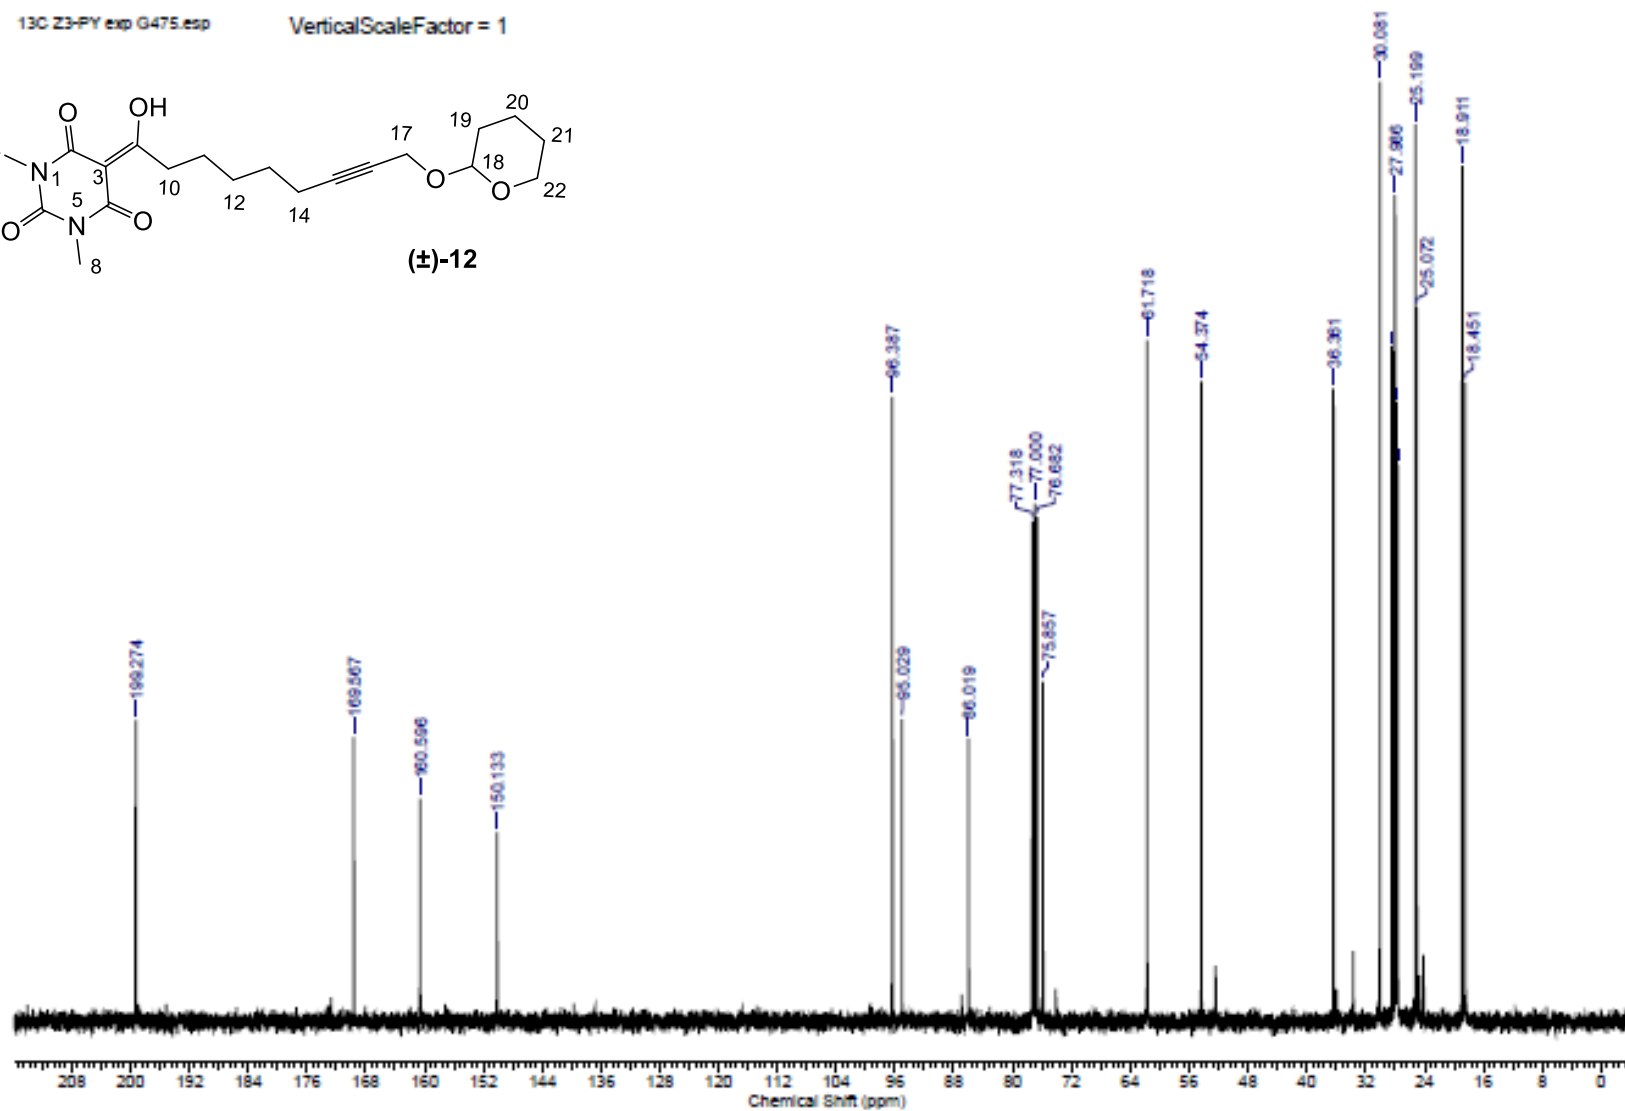

1H.ZTA3-OHC exp G372.exp

VerticalScaleFactor = 1

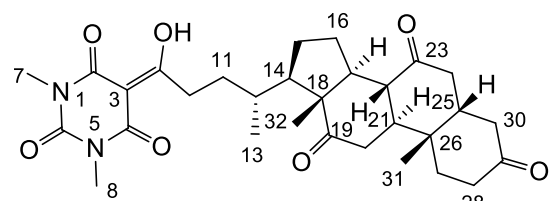

13

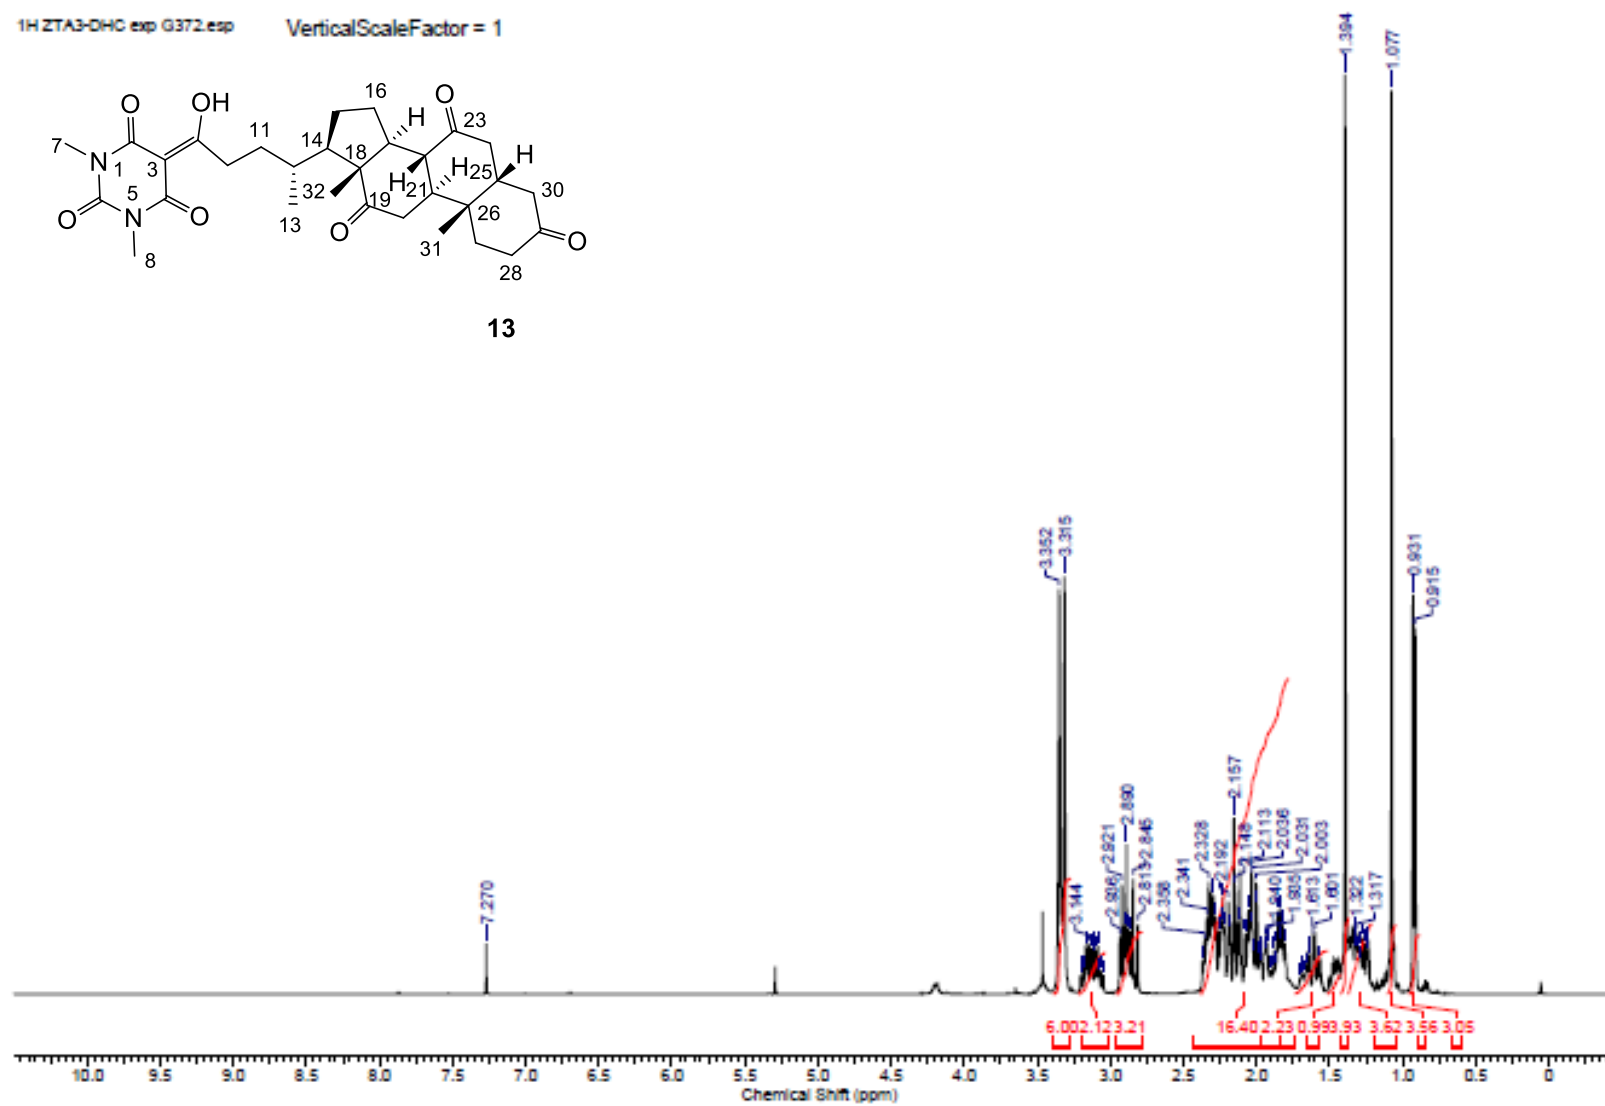

13C ZTAS-DHC exp G372.esp

VerticalScaleFactor = 1

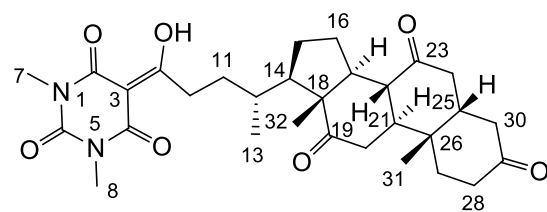

13

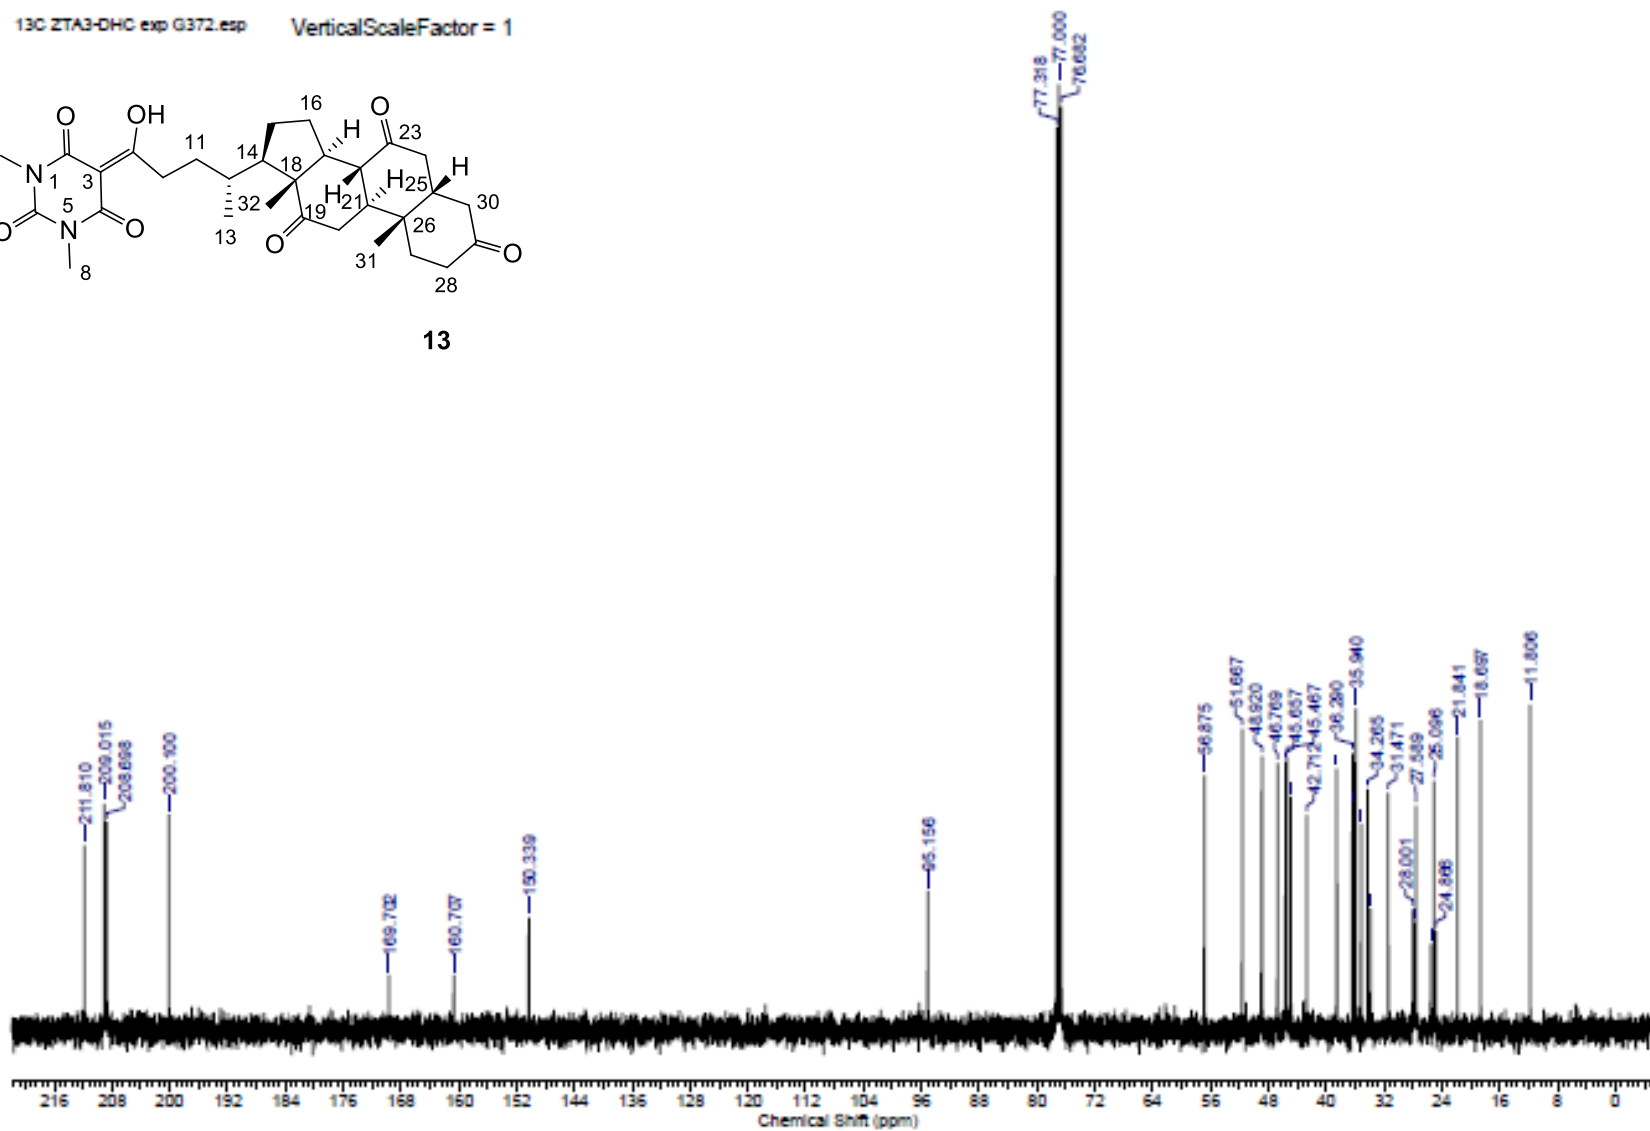

1H Z3-ART exp G560.esp

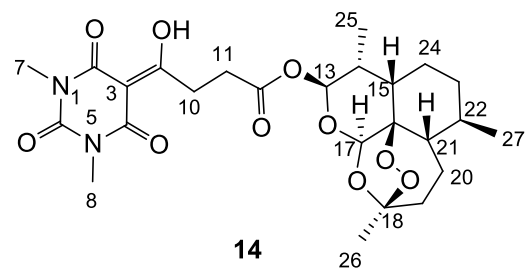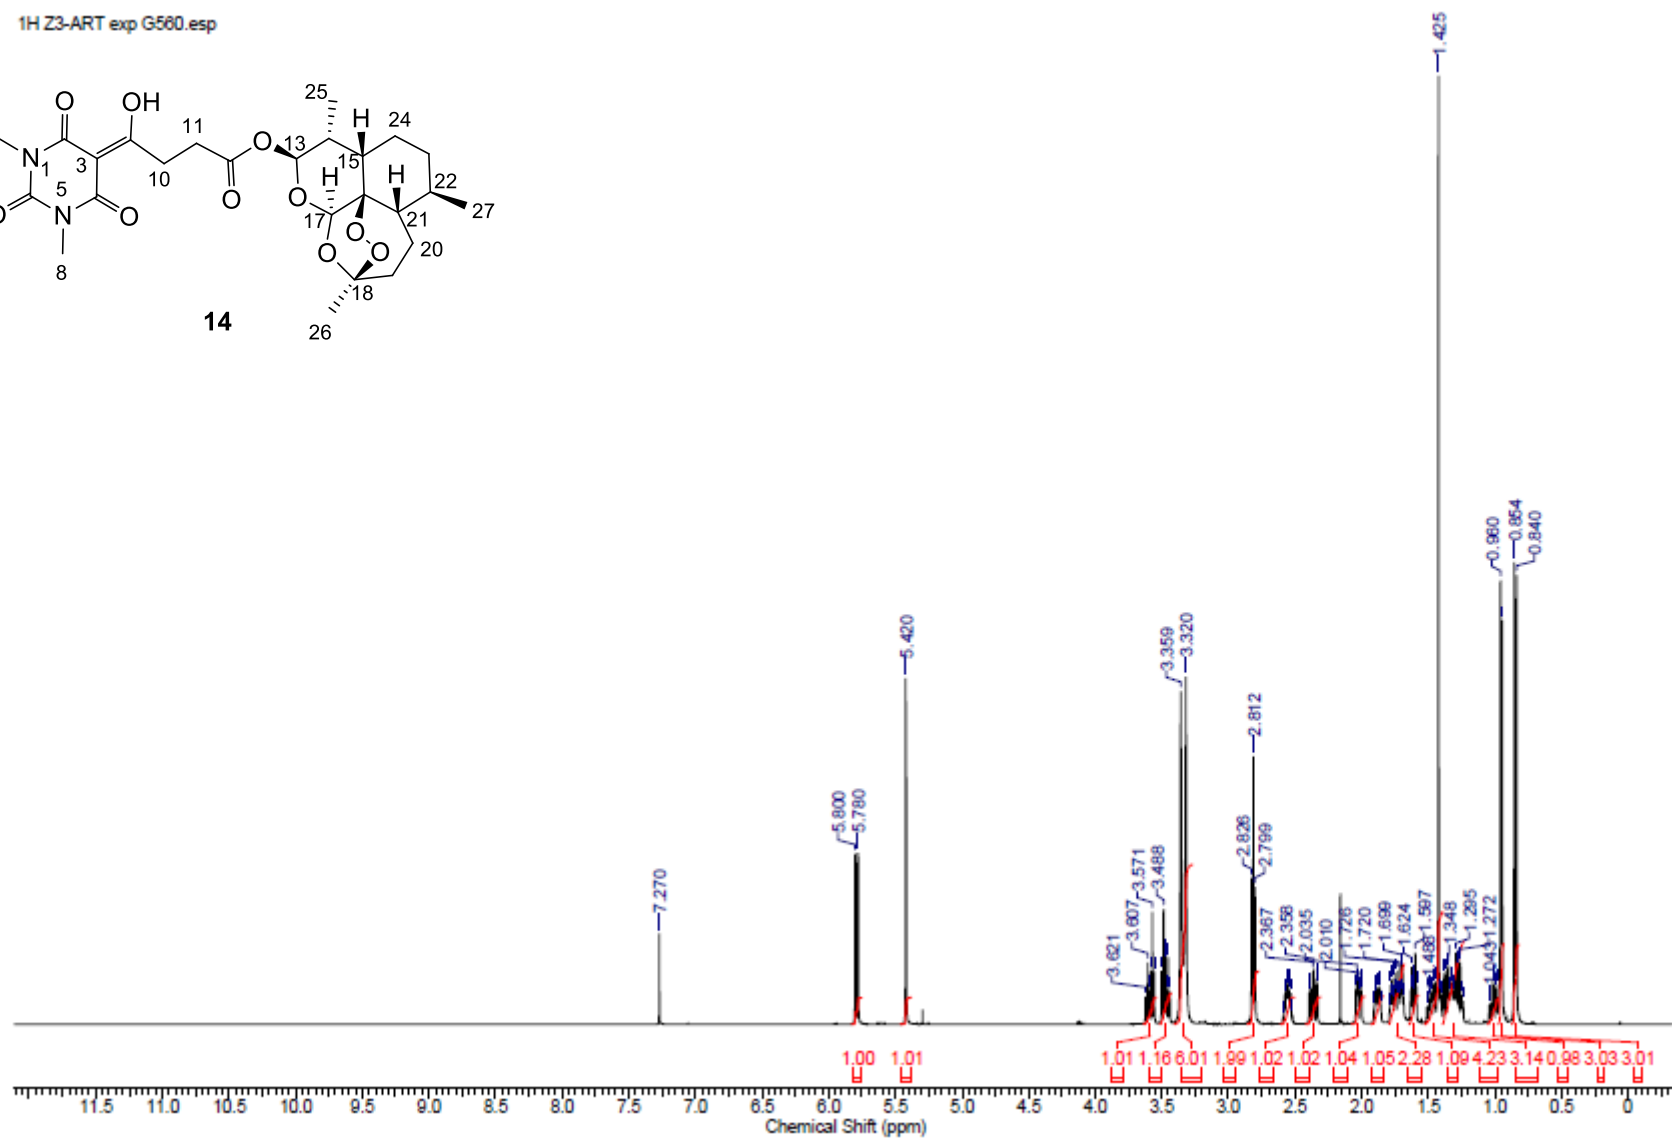



**14**

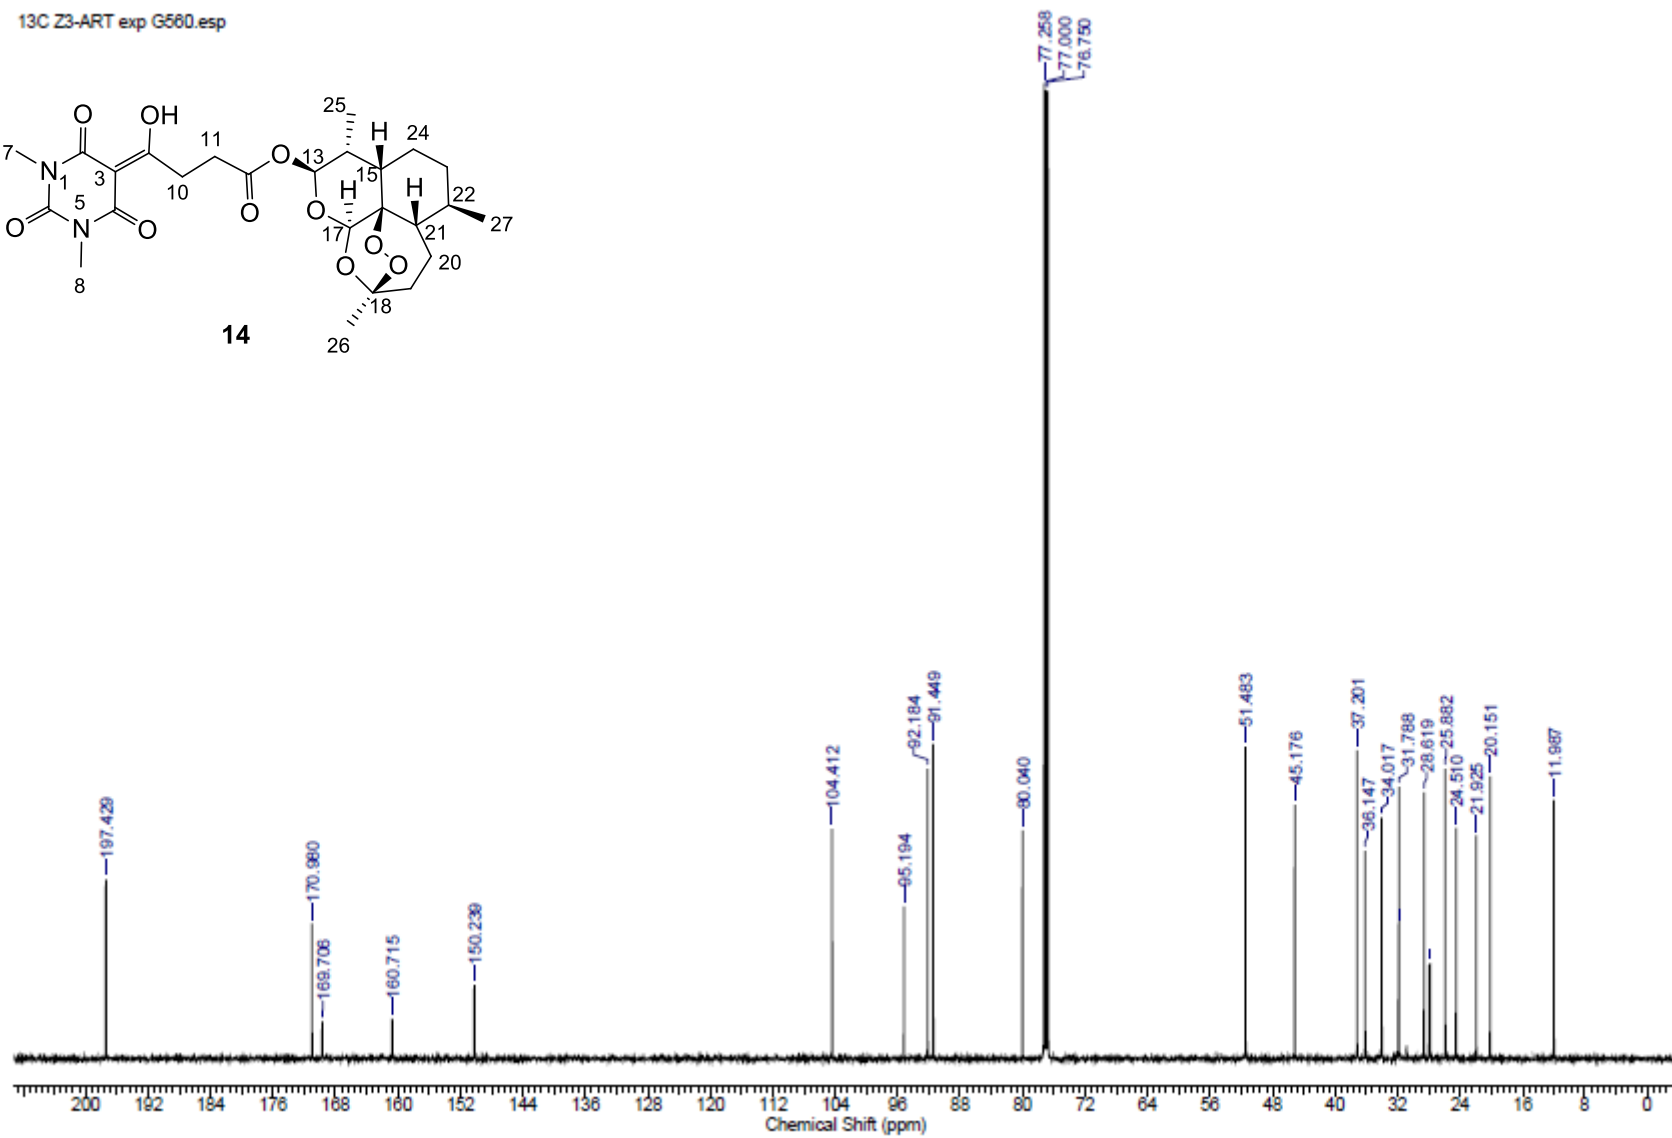

1H Z3-G4 exp G514.exp

VerticalScaleFactor = 1

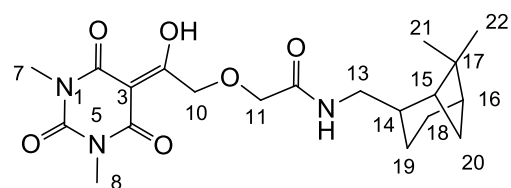

**15a**

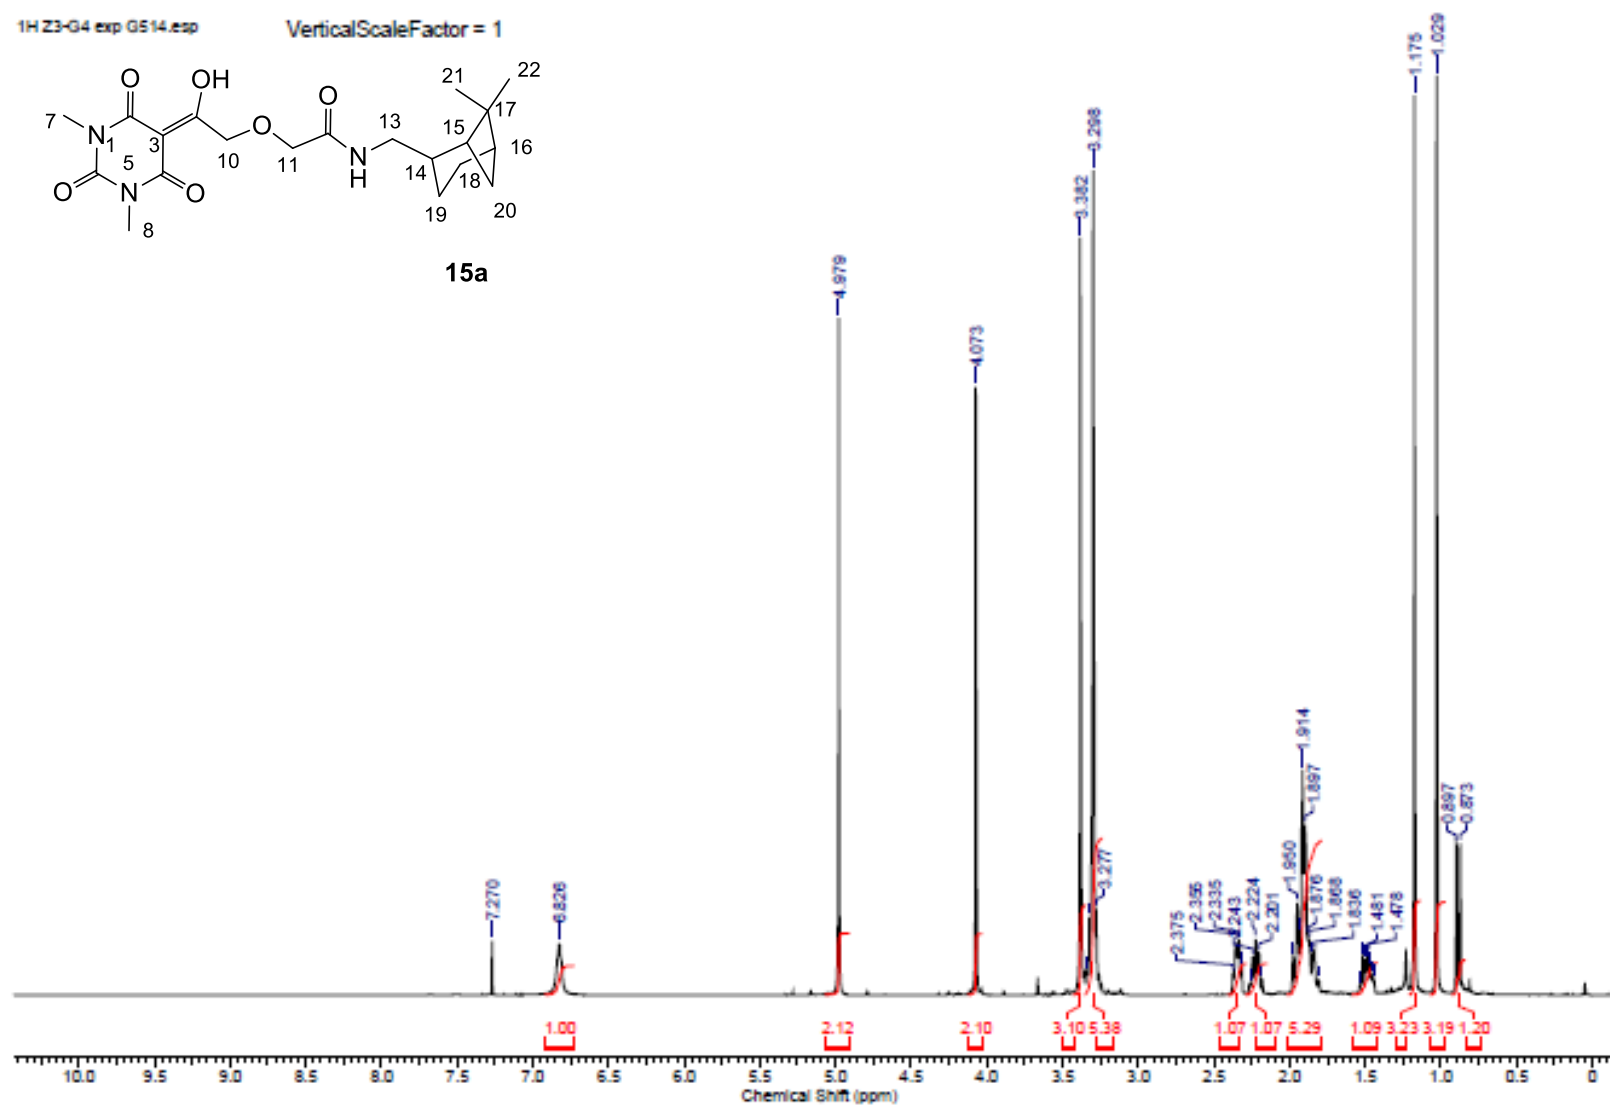

13C Z3-G4 exp G514.esp

VerticalScaleFactor = 1

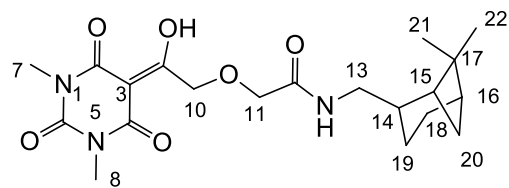

**15a**

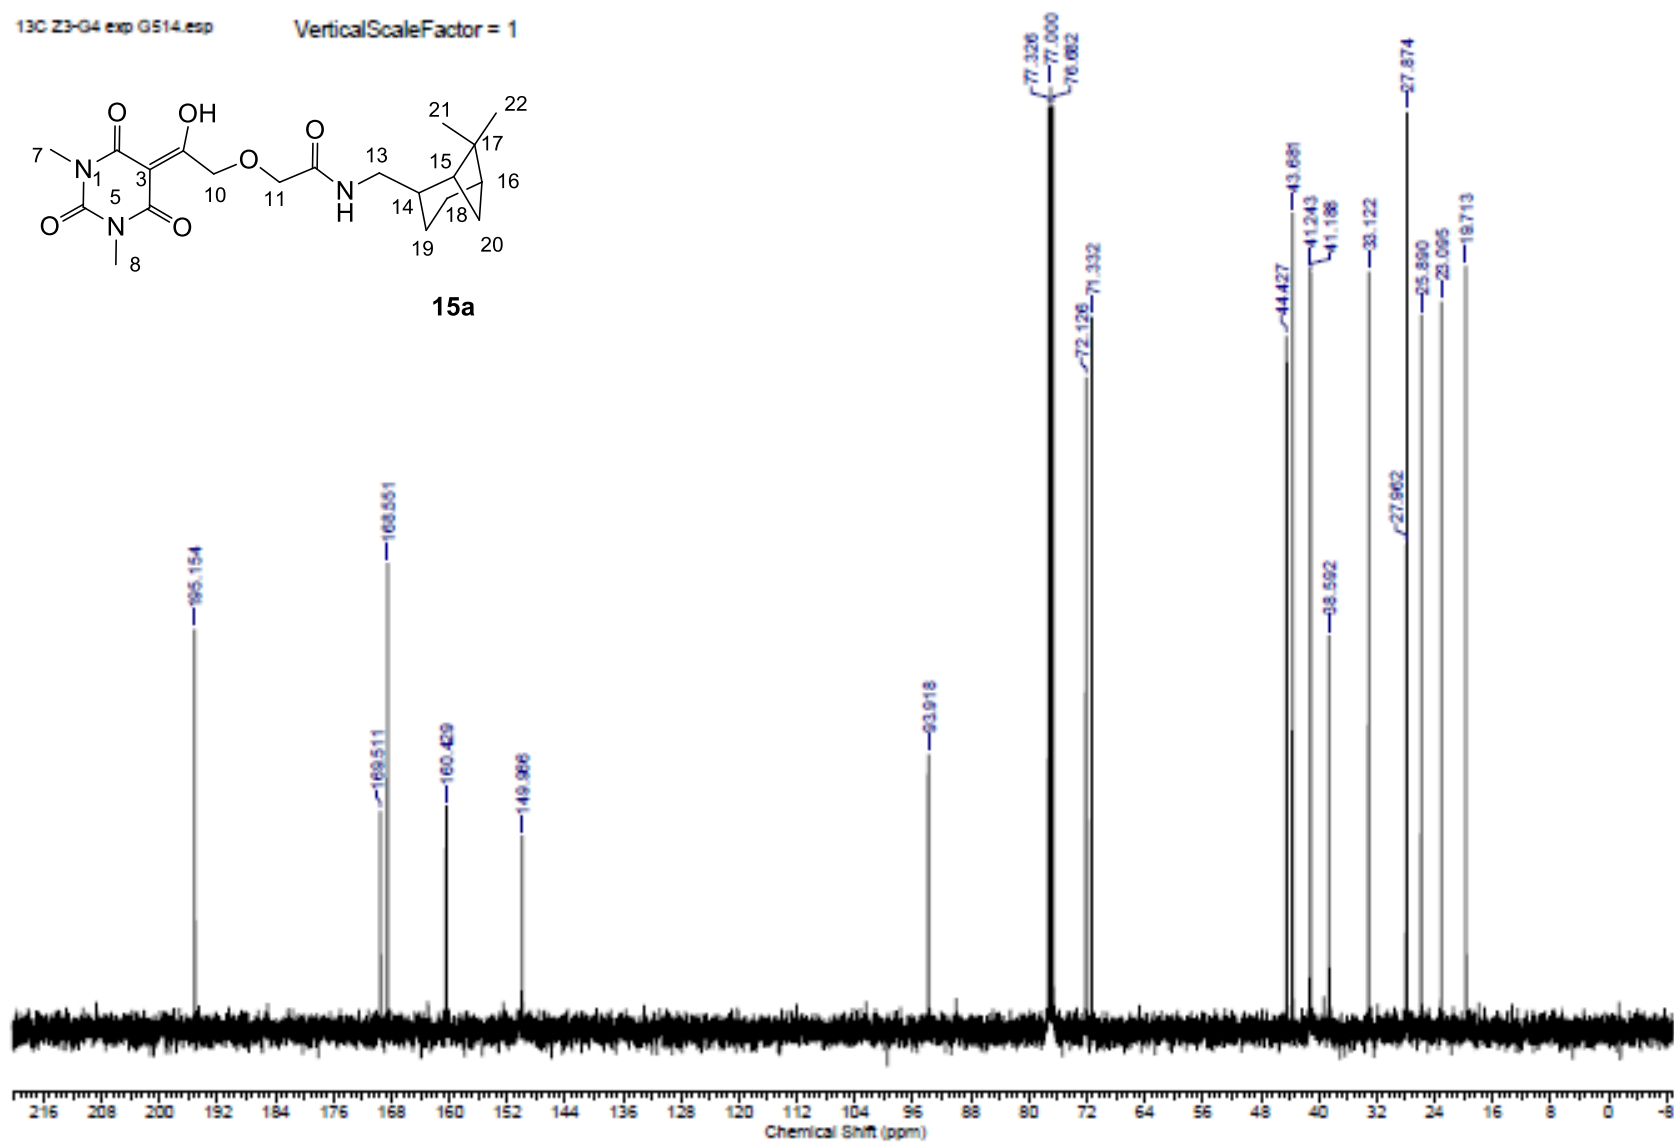

1H Z3-G2 exp G444 500.exp

VerticalScaleFactor = 1

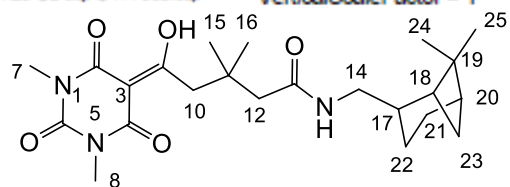

**15b**

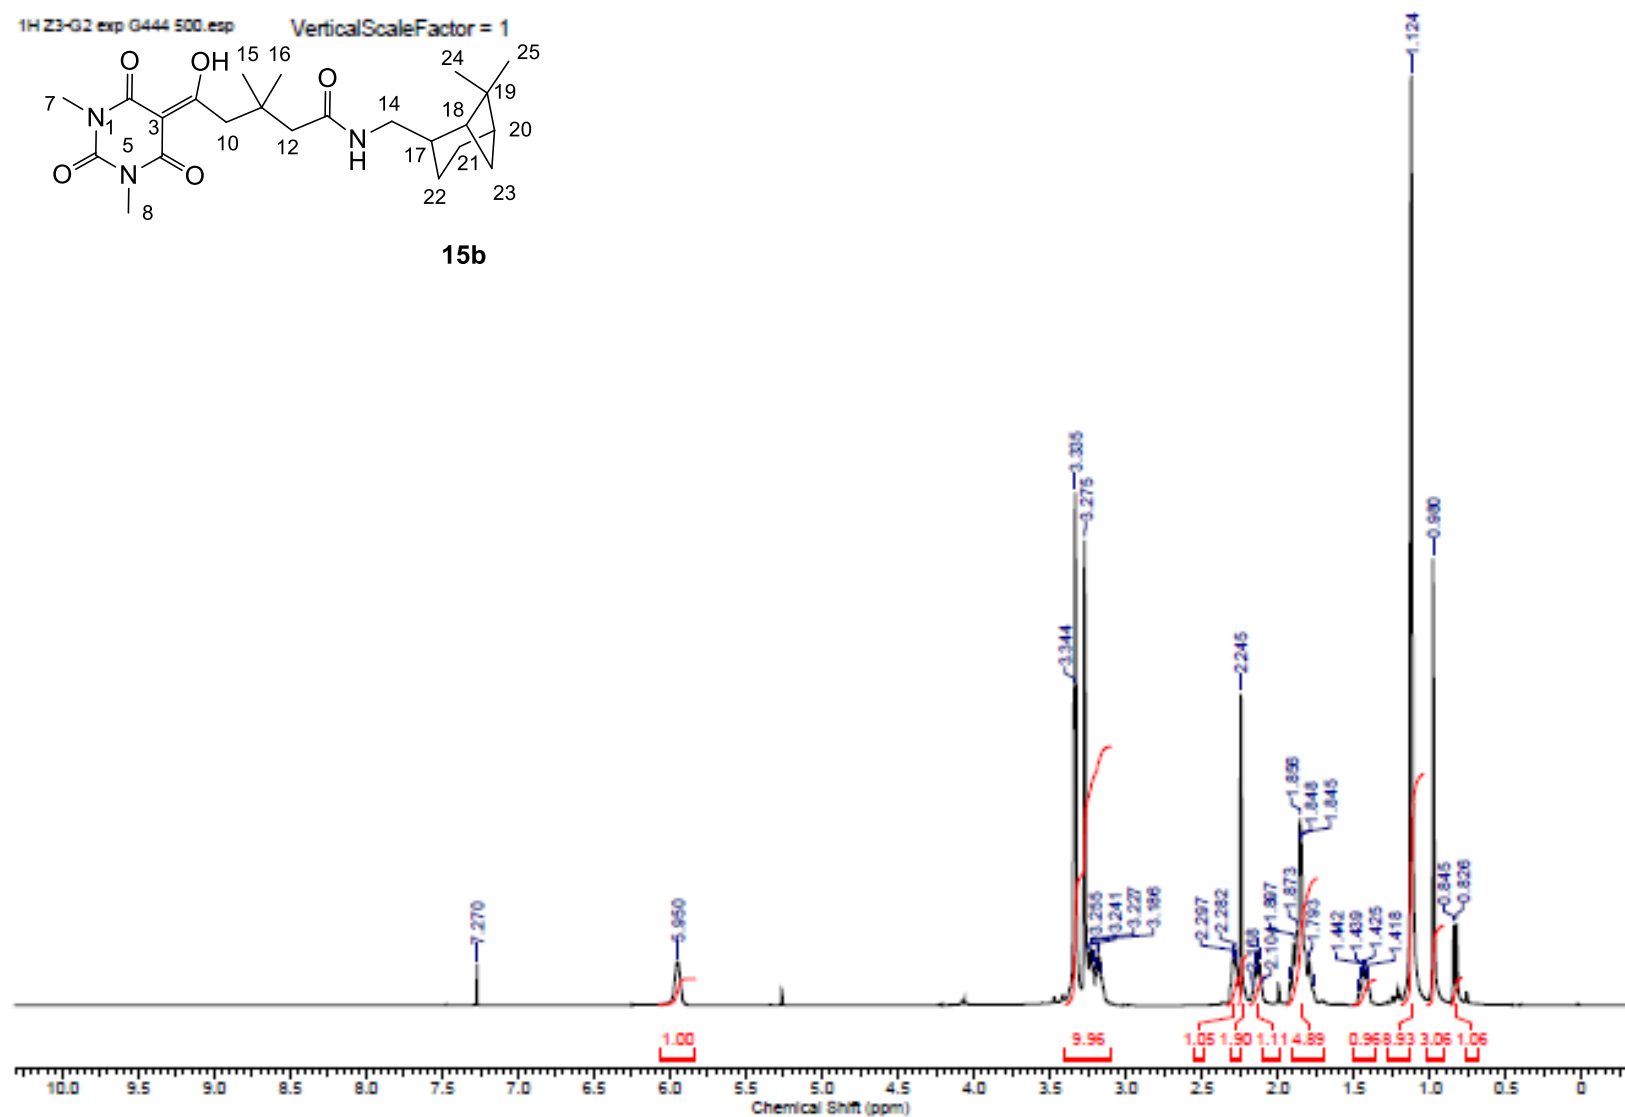

13C Z3-G2 exp G444 500.exp

VerticalScaleFactor = 1

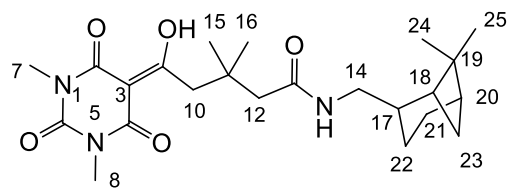

15b

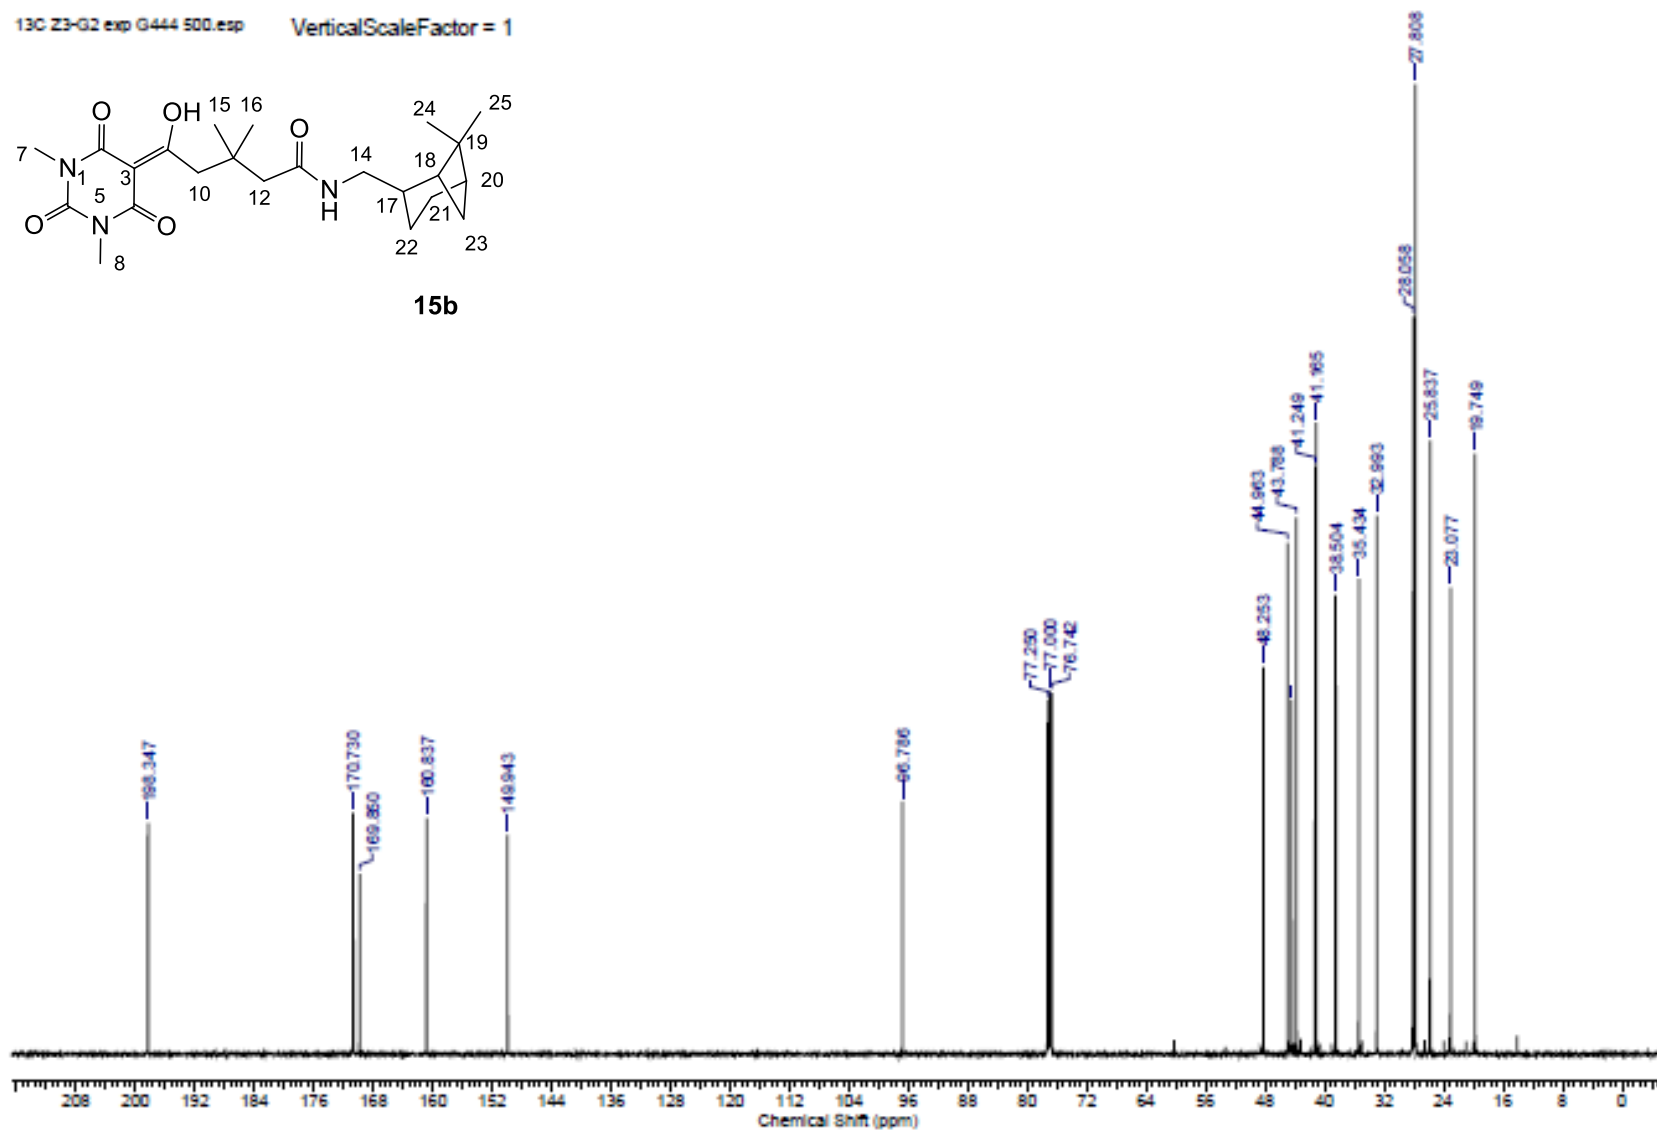

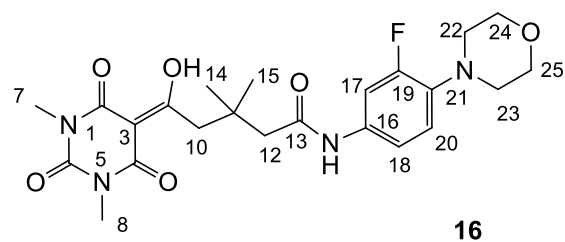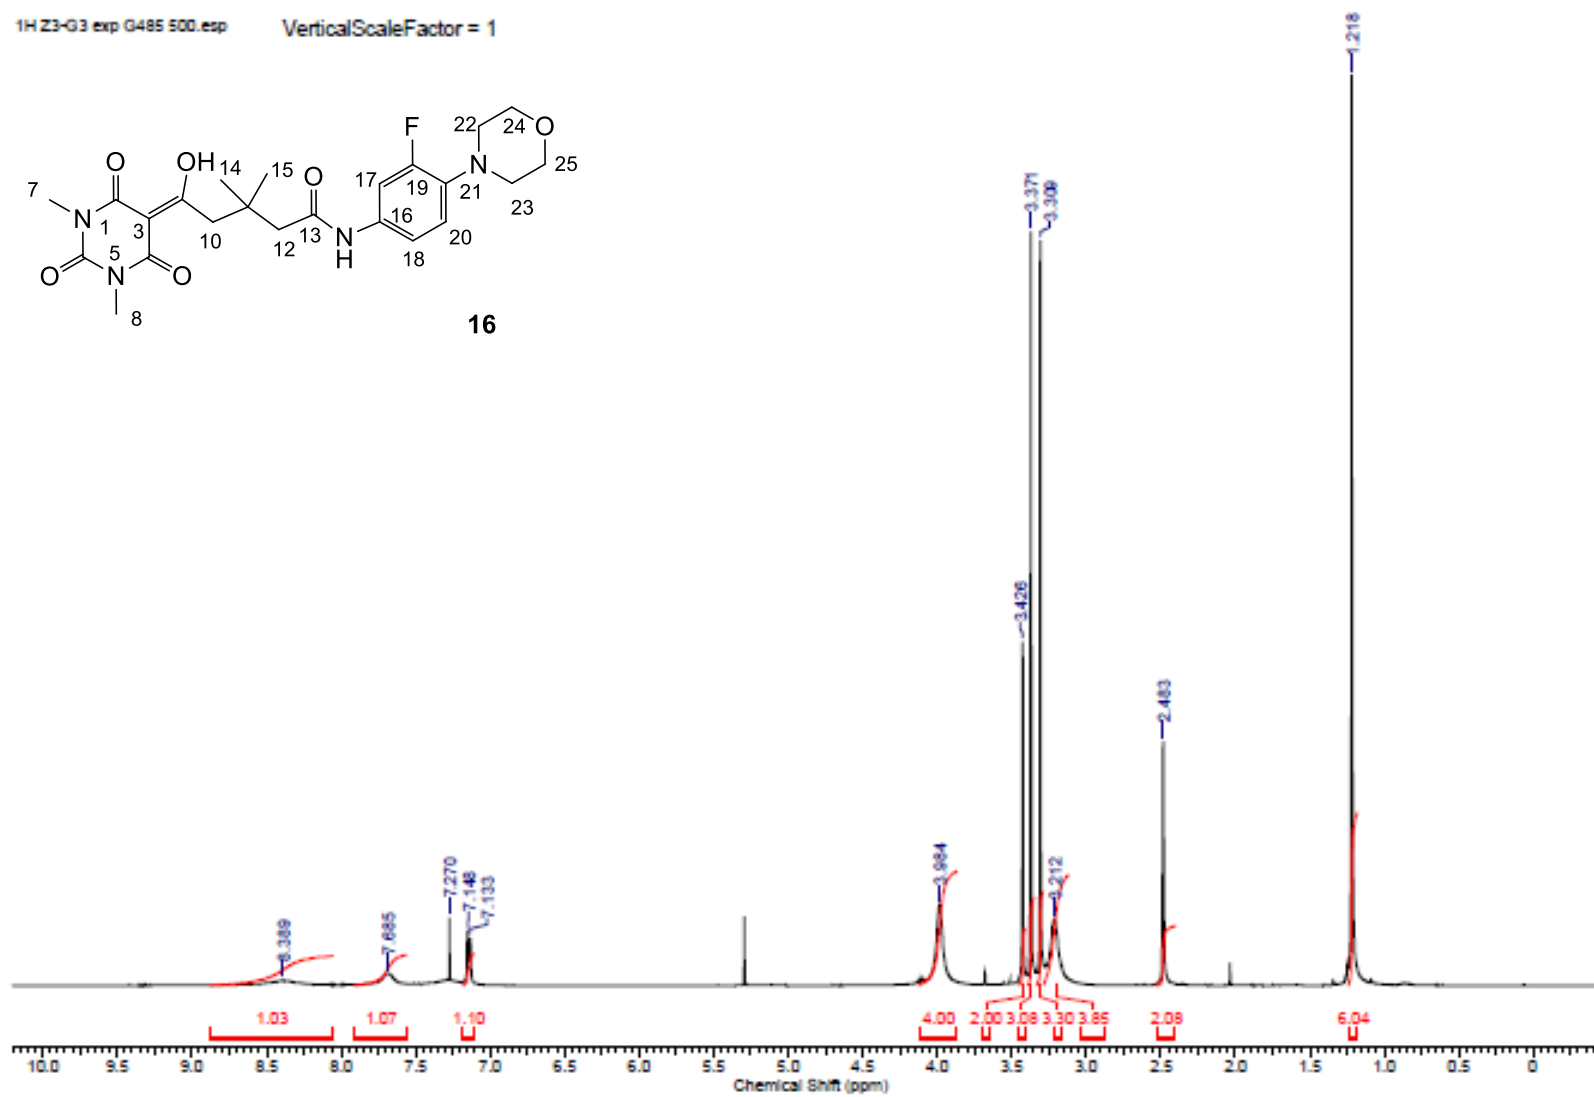

13C Z3-G3 exp G485 500.exp

VerticalScaleFactor = 1

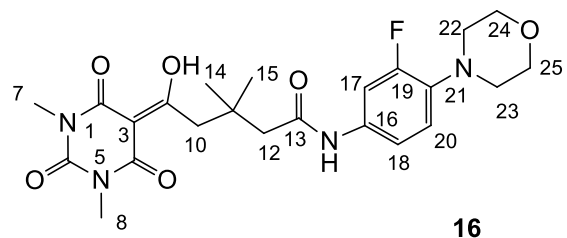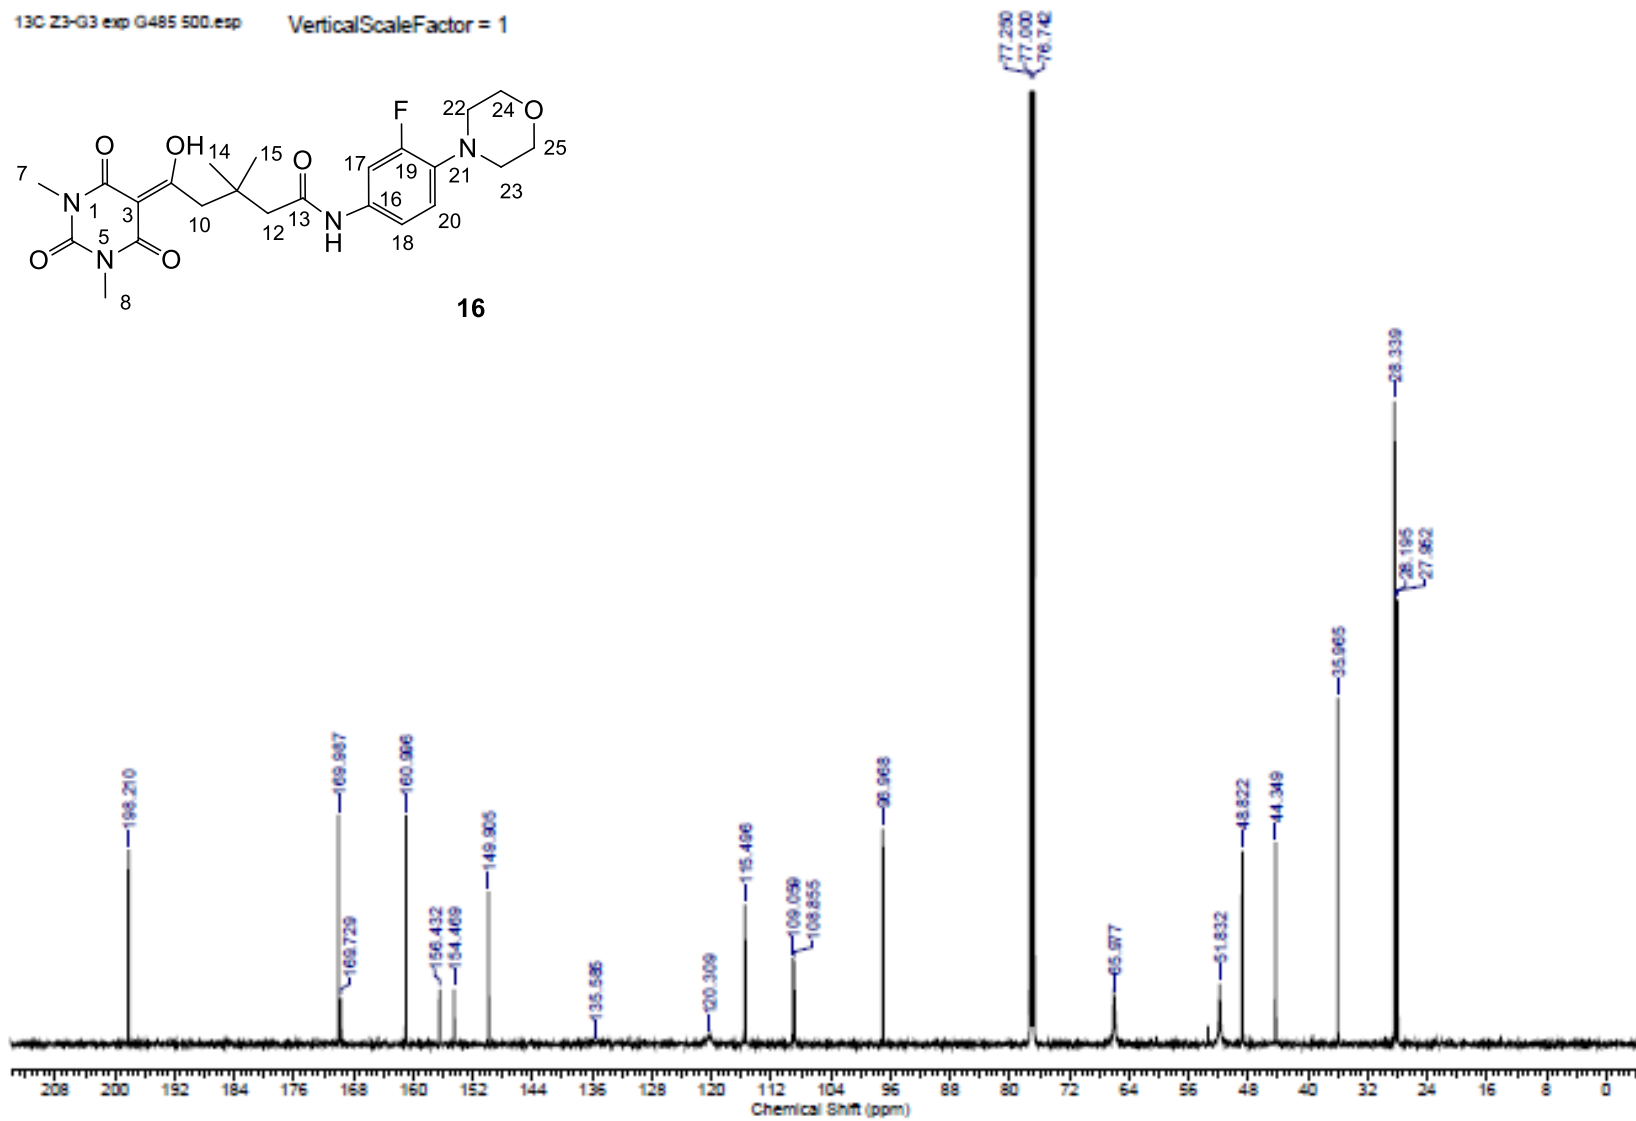

1H ZTA3-C30PH .esp

VerticalScaleFactor = 1

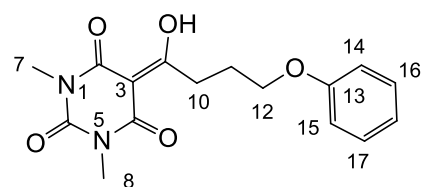

17a

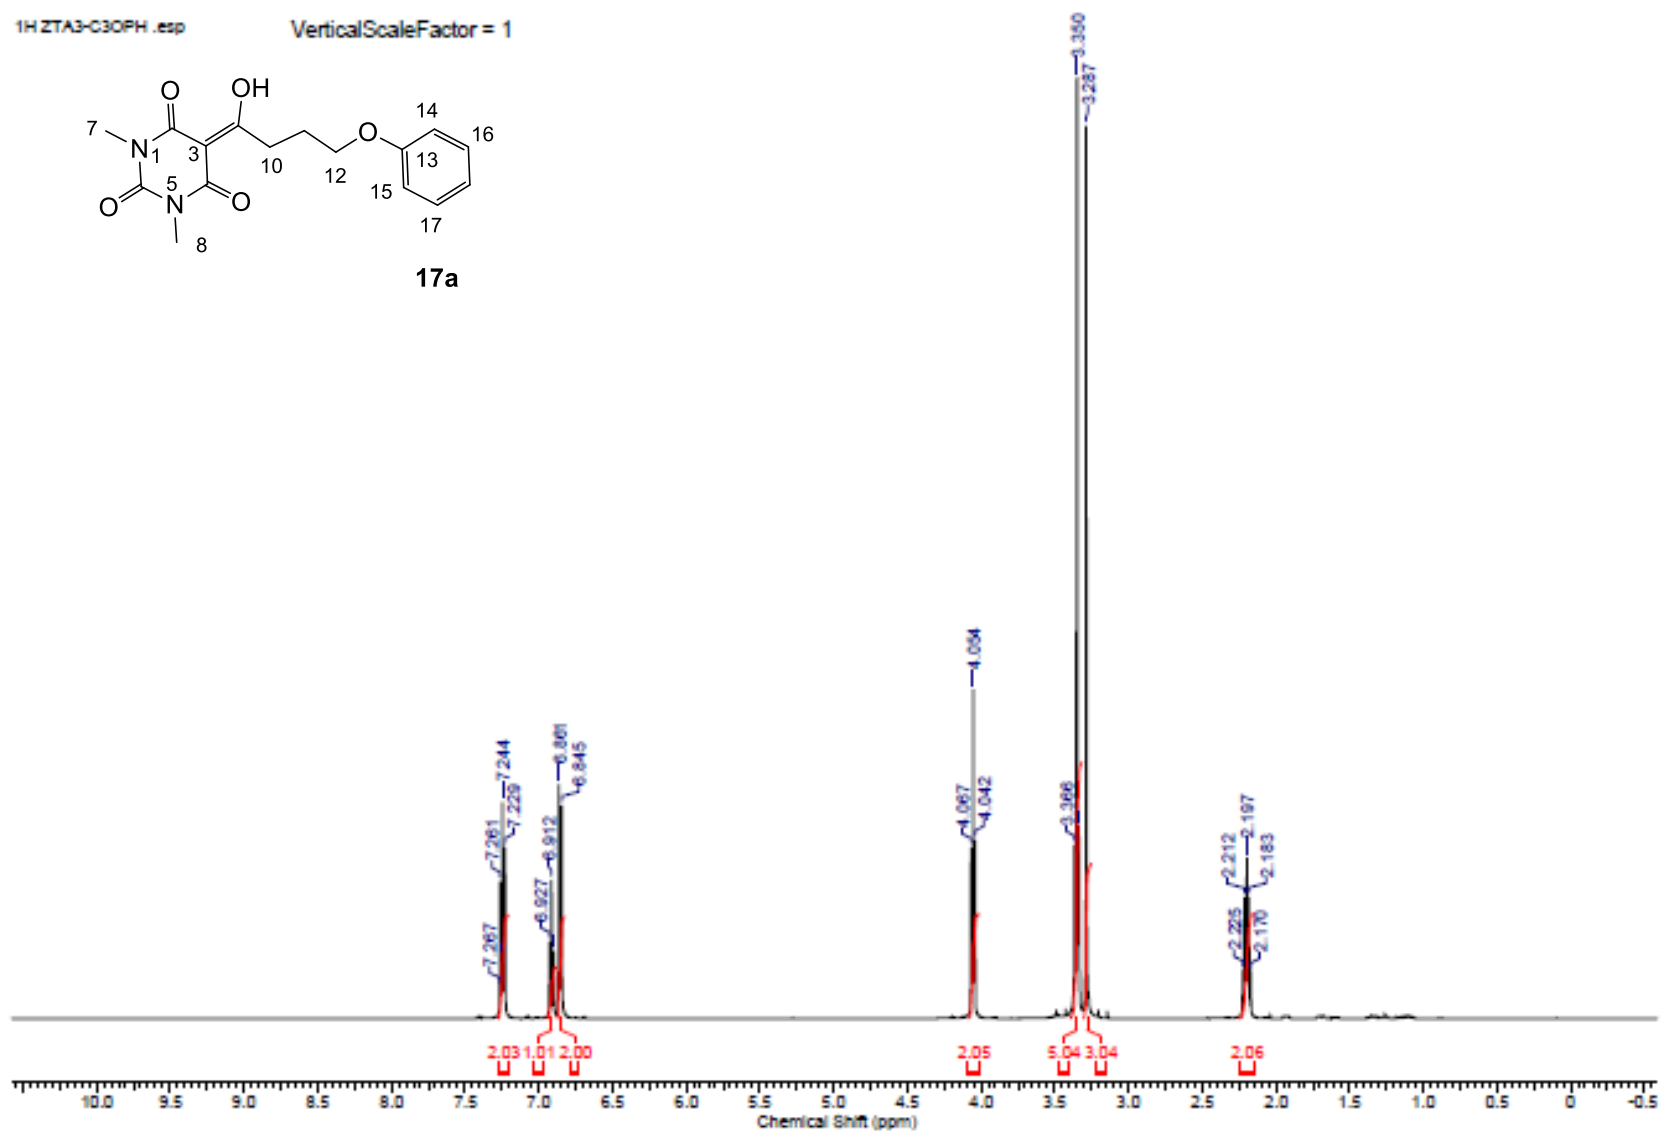



13C ZTA3-C3OPH.esp

VerticalScaleFactor = 1

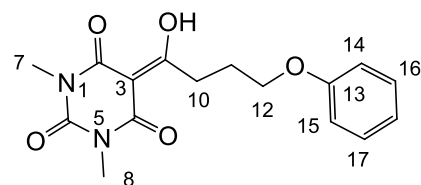

**17a**

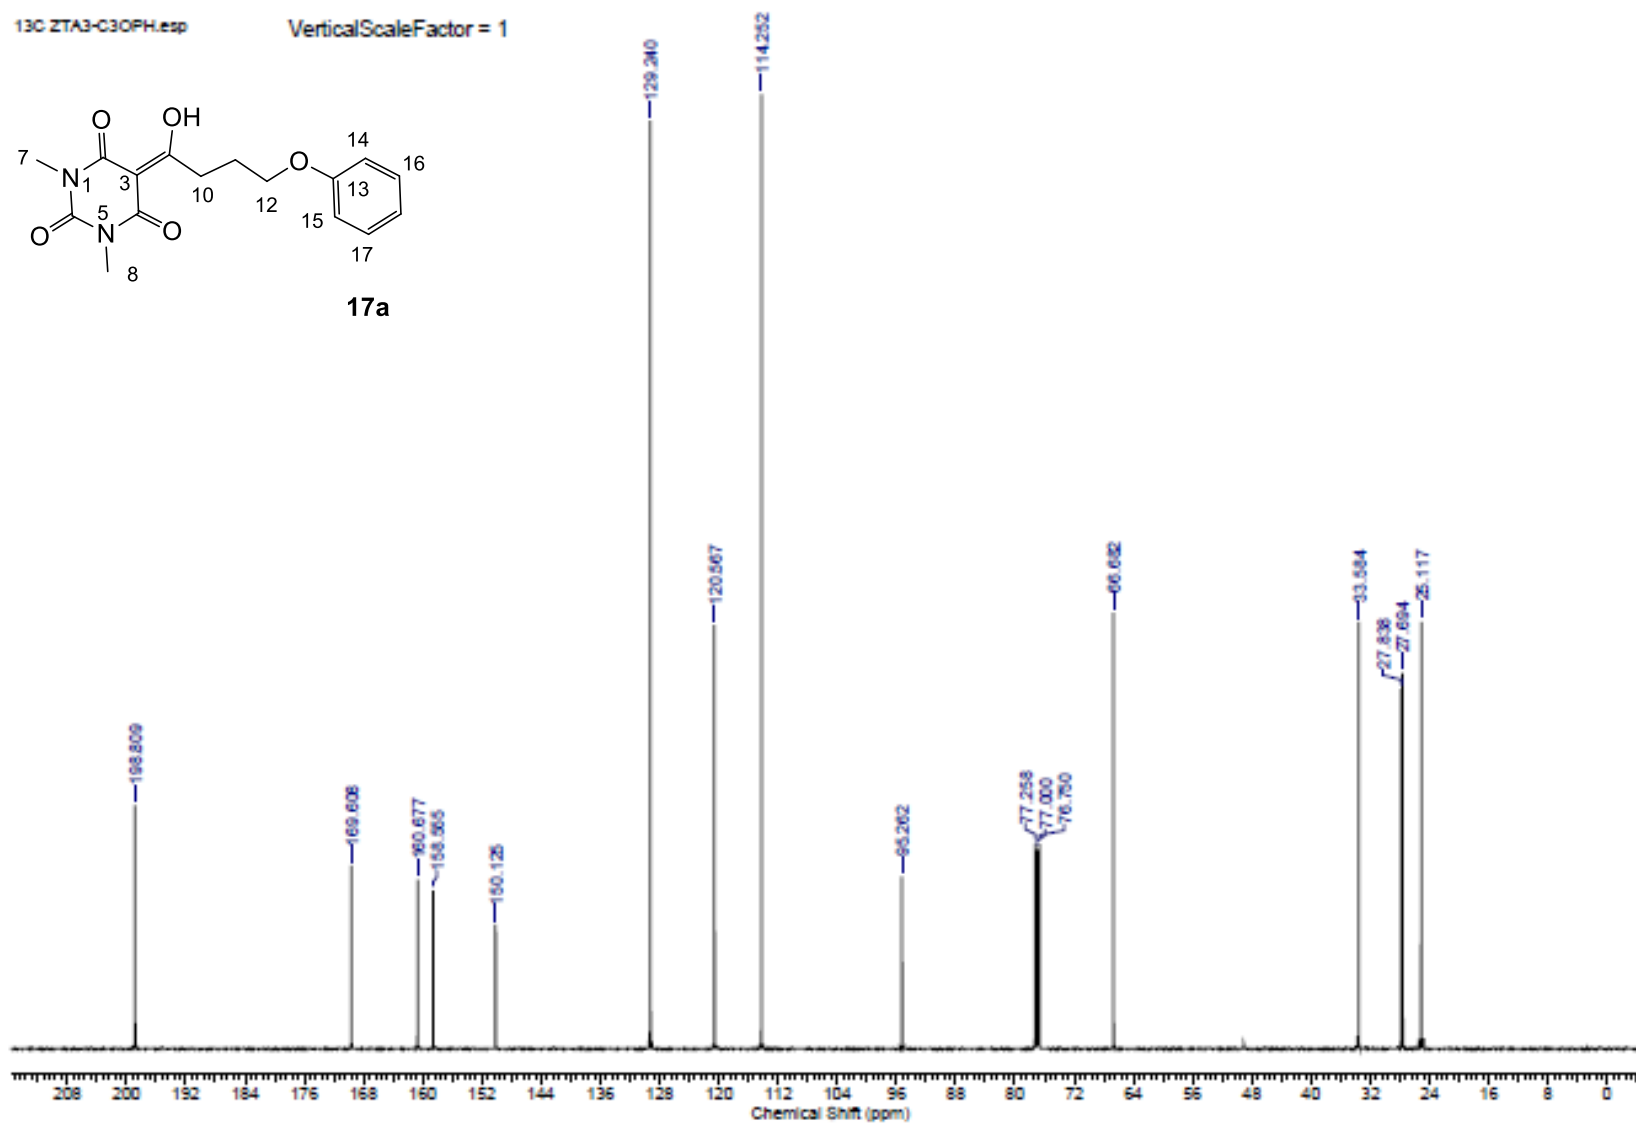

HMBC ZTA3-C3OPH .esp

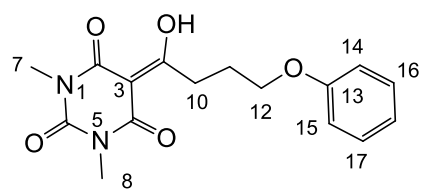

**17a**

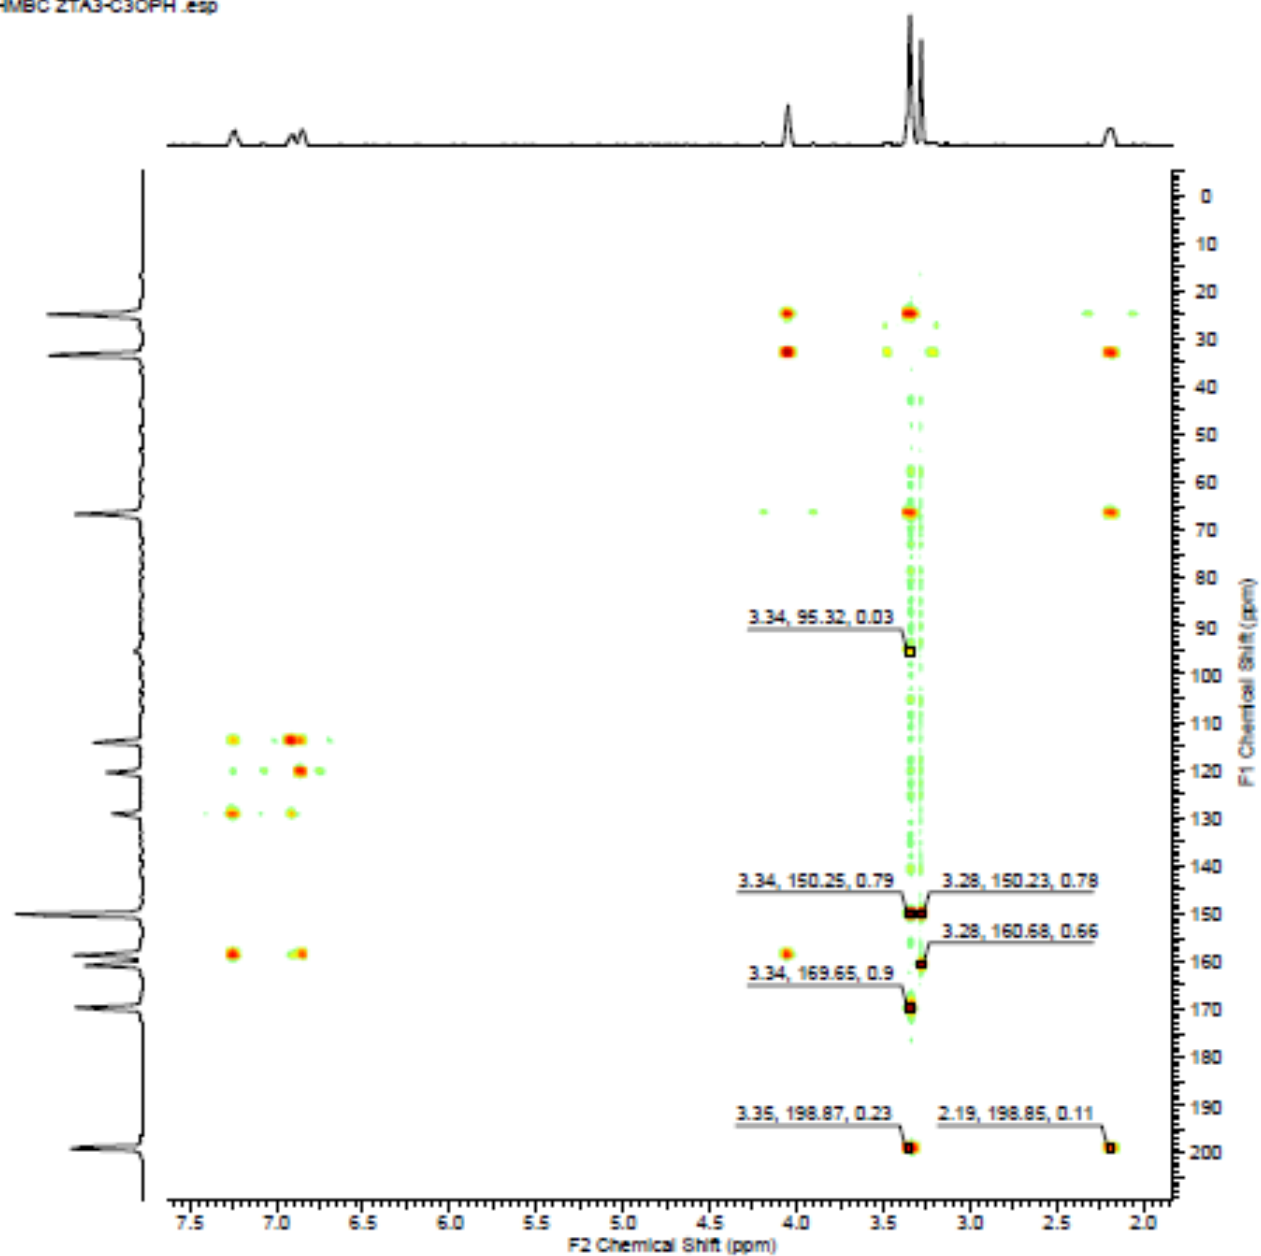

1H Z3-C30B exp G458.exp

VerticalScaleFactor = 1

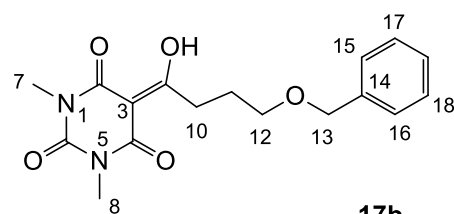

**17b**

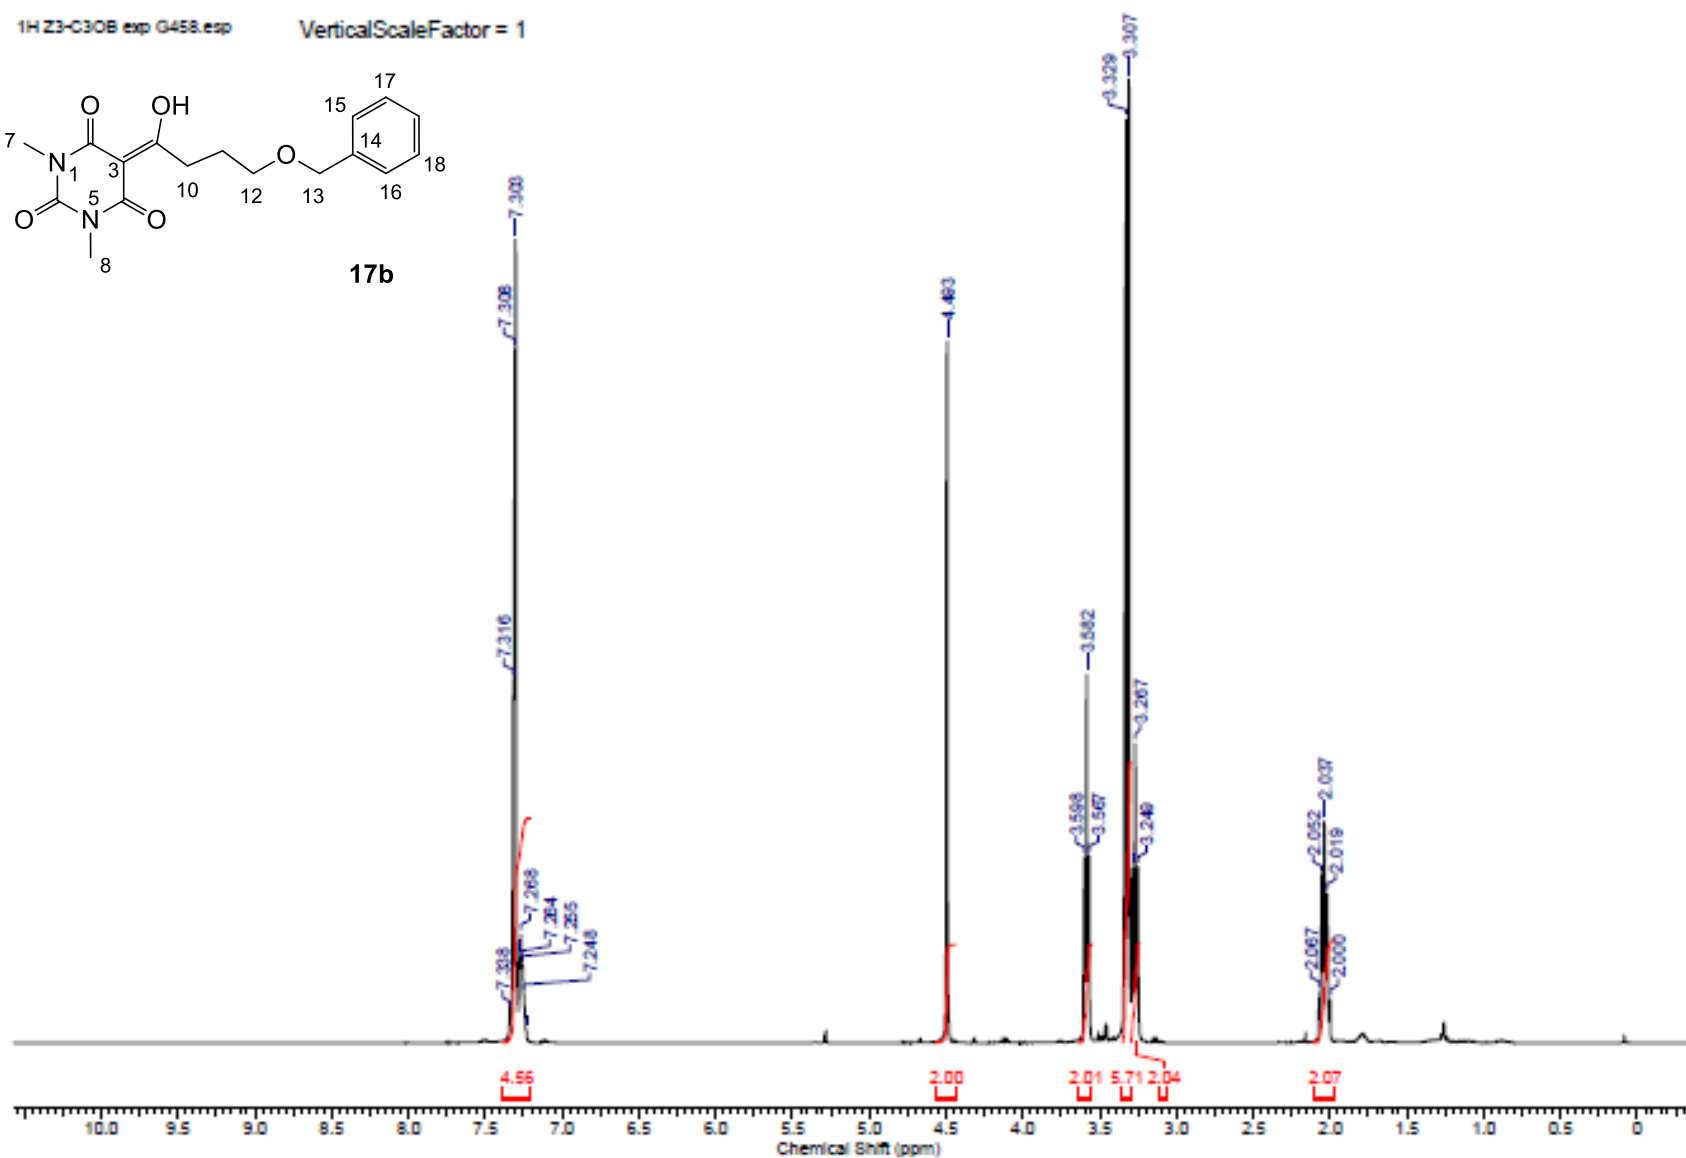

13C Z3-C30B exp G458.esp

VerticalScaleFactor = 1

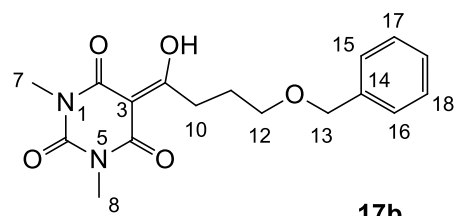

17b

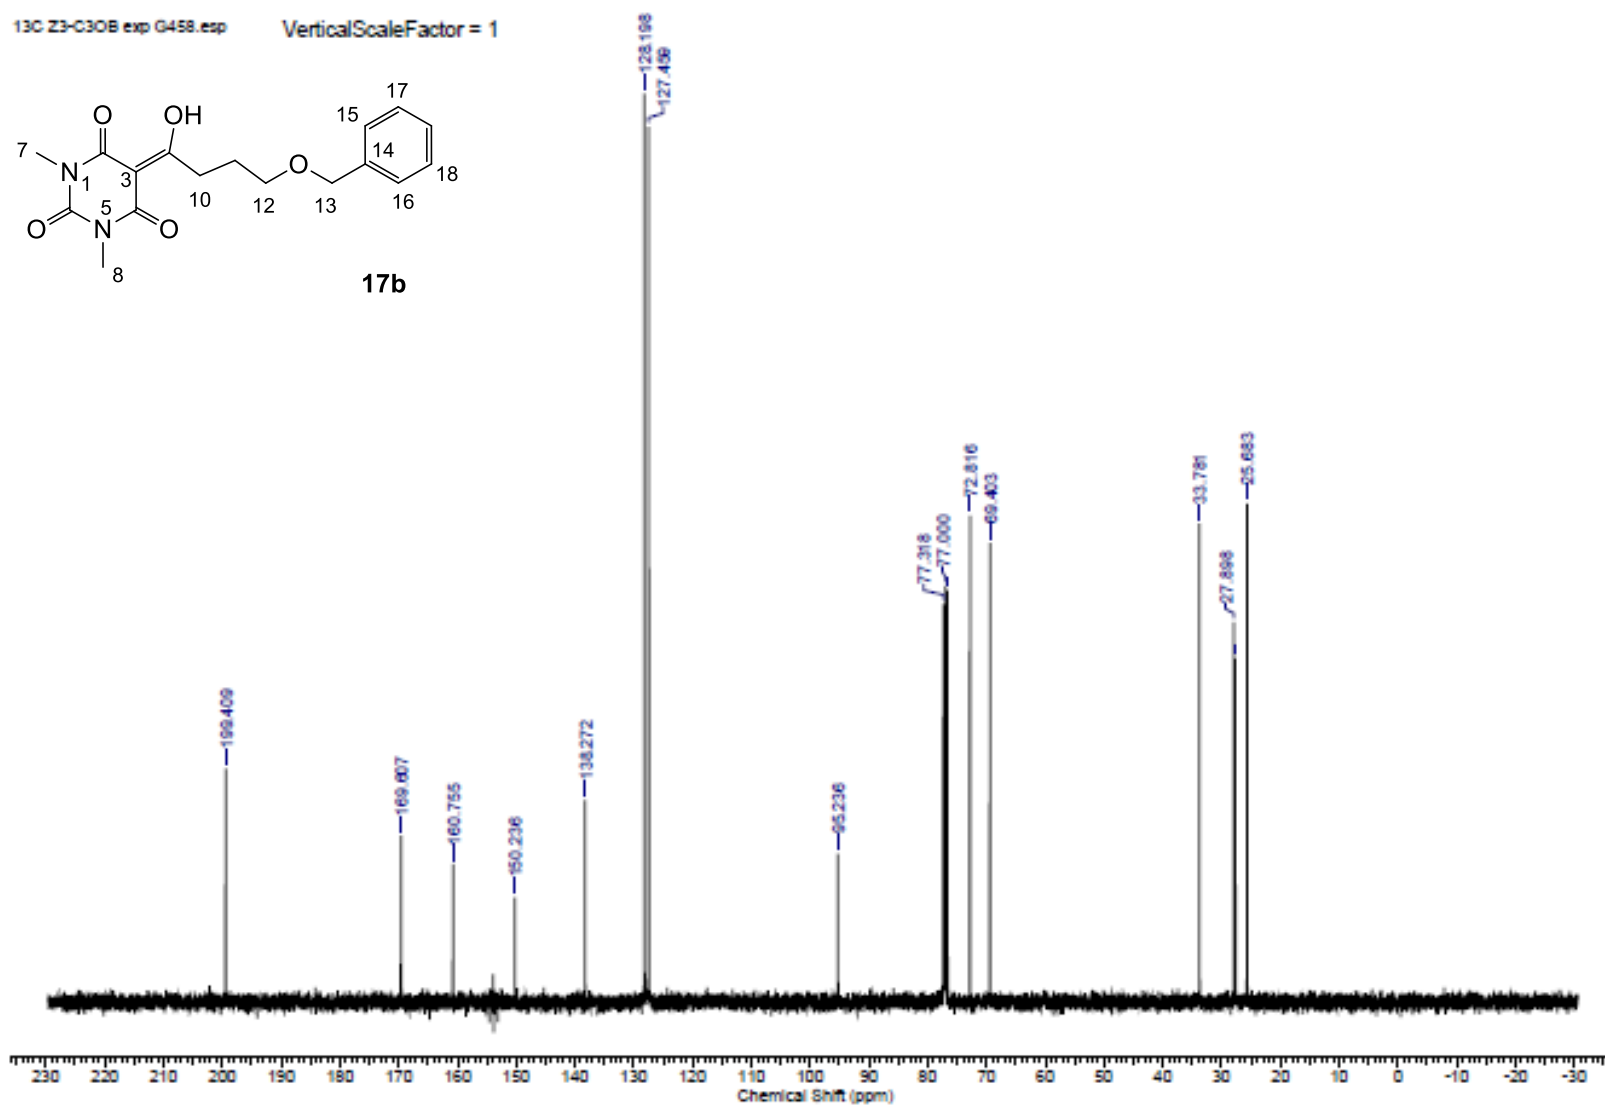

1H Z3-C3ON exp G462.esp

VerticalScaleFactor = 1

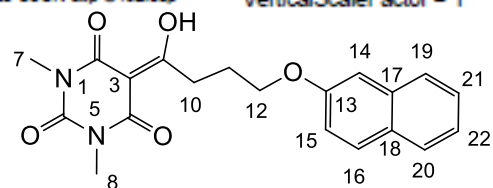

17c

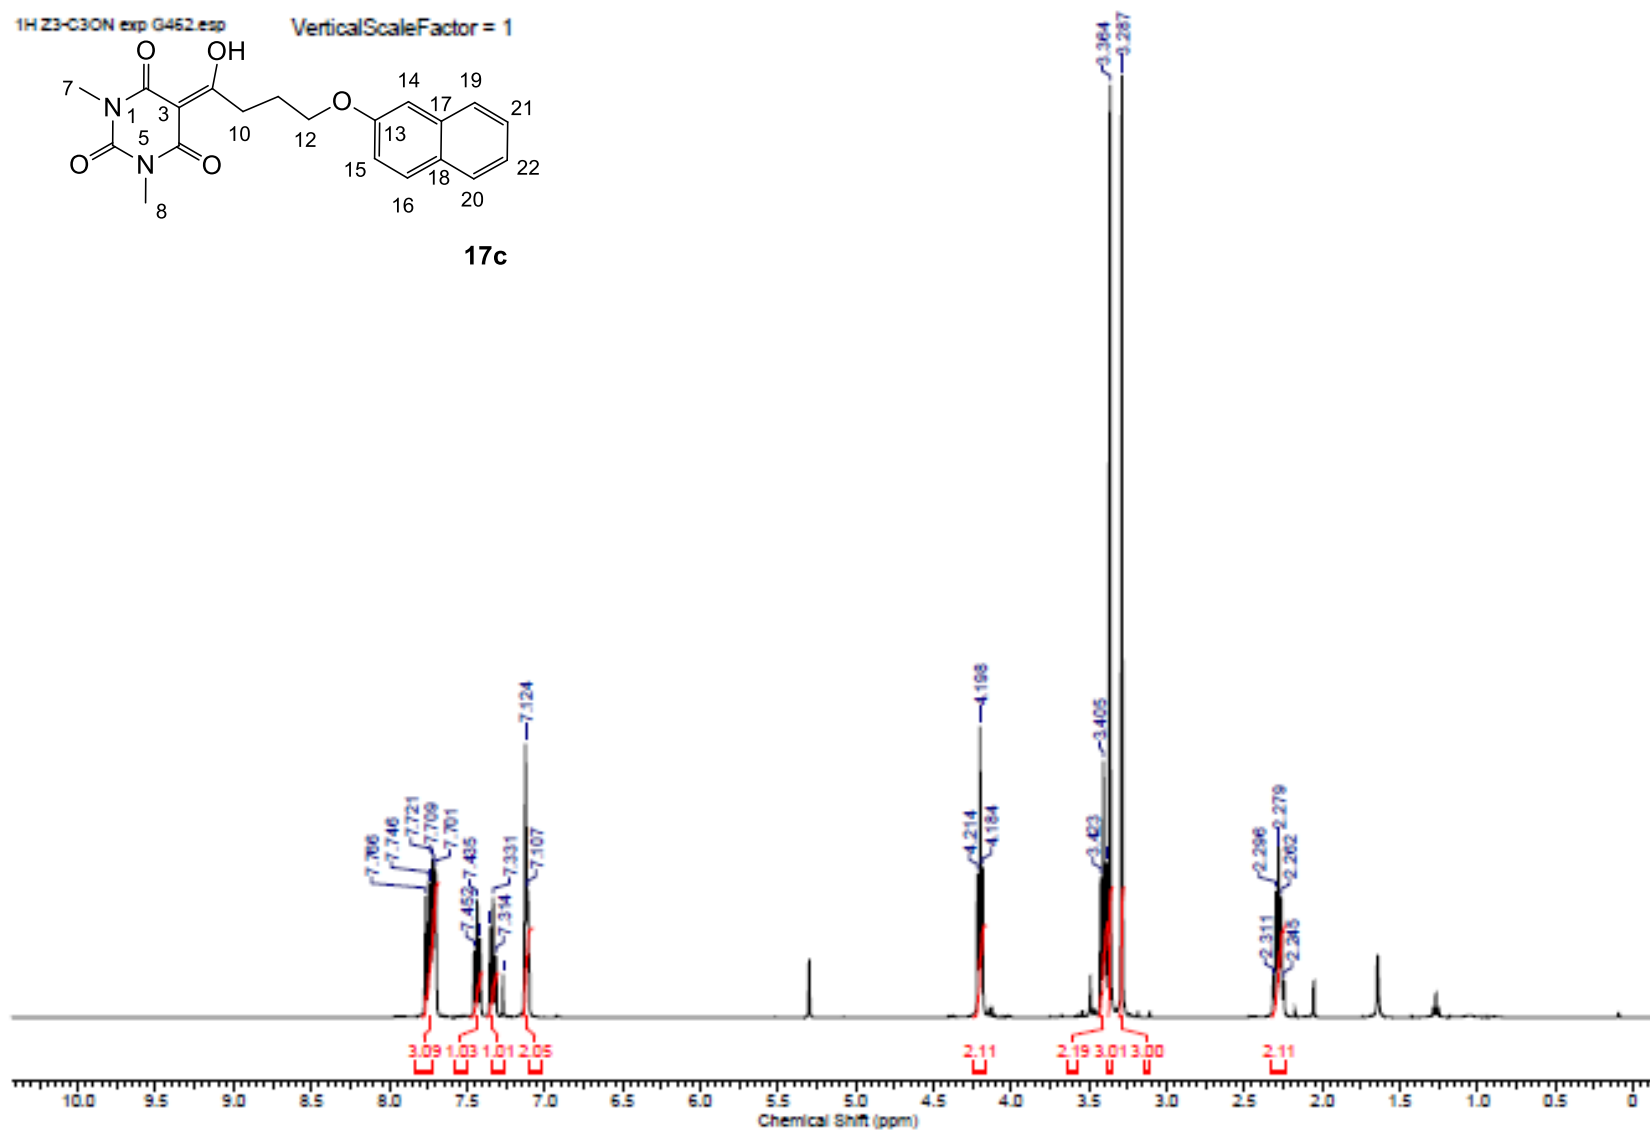

13C Z3-C3ON exp G462.esp

VerticalScaleFactor = 1

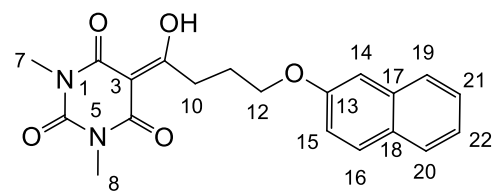

17c

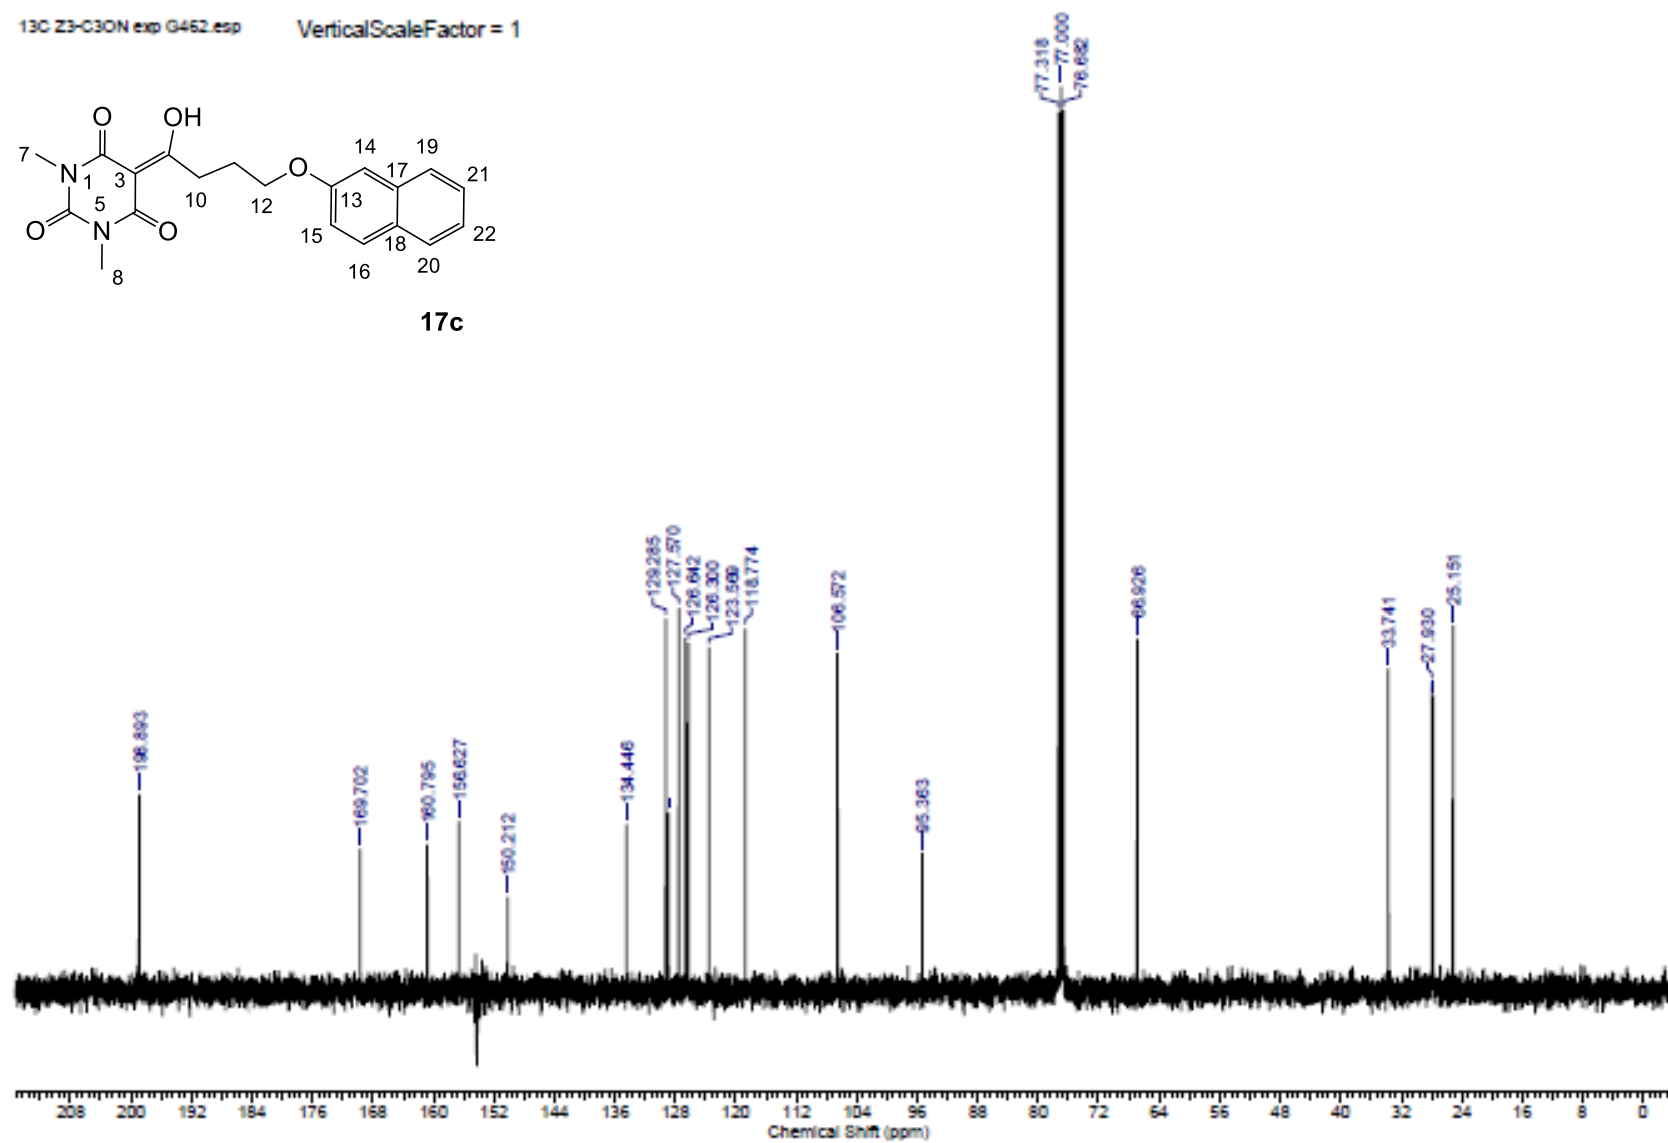

1H Z3-C3OP6 exp G459.esp

VerticalScaleFactor = 1

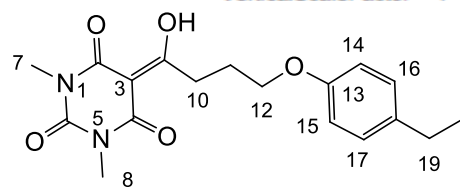

**18a**

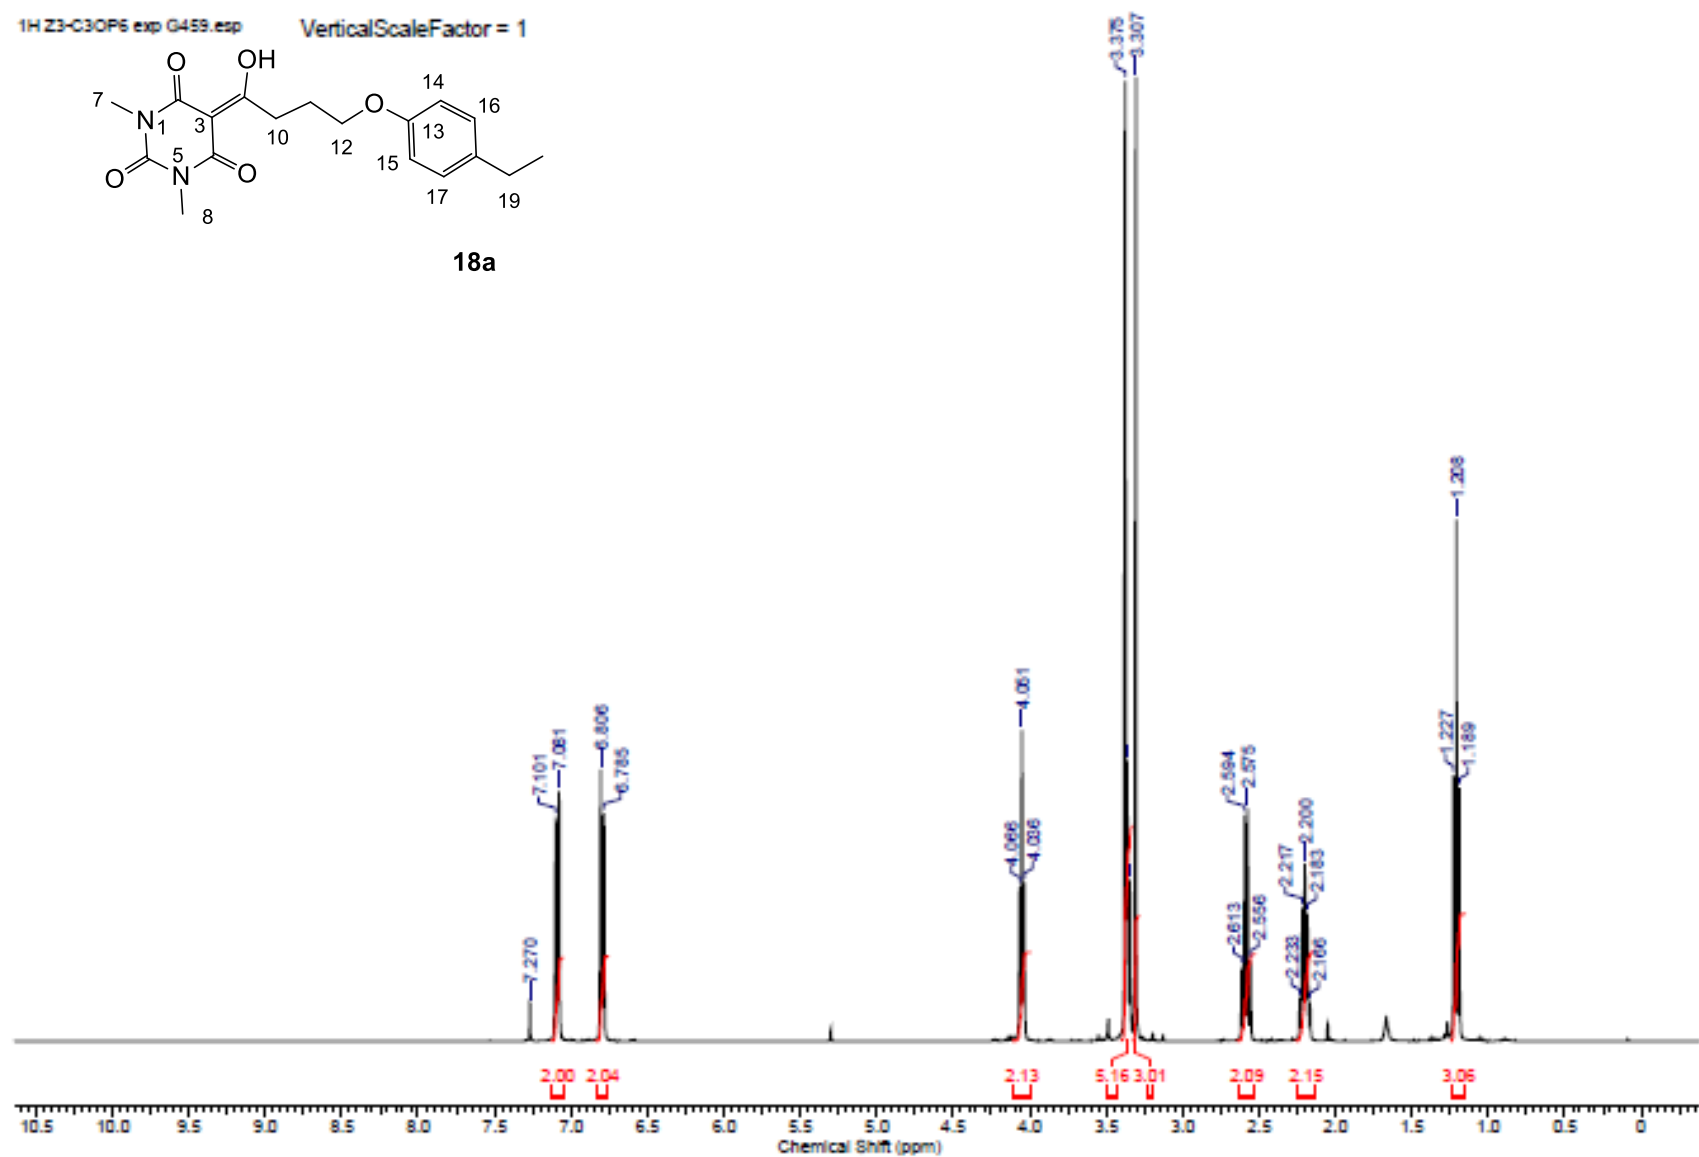

13C Z3-C3OP6 exp G459.exp

VerticalScaleFactor = 1

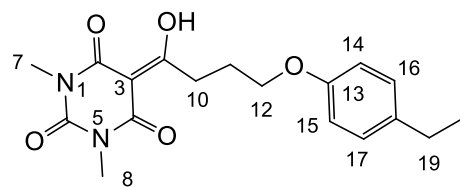

18a

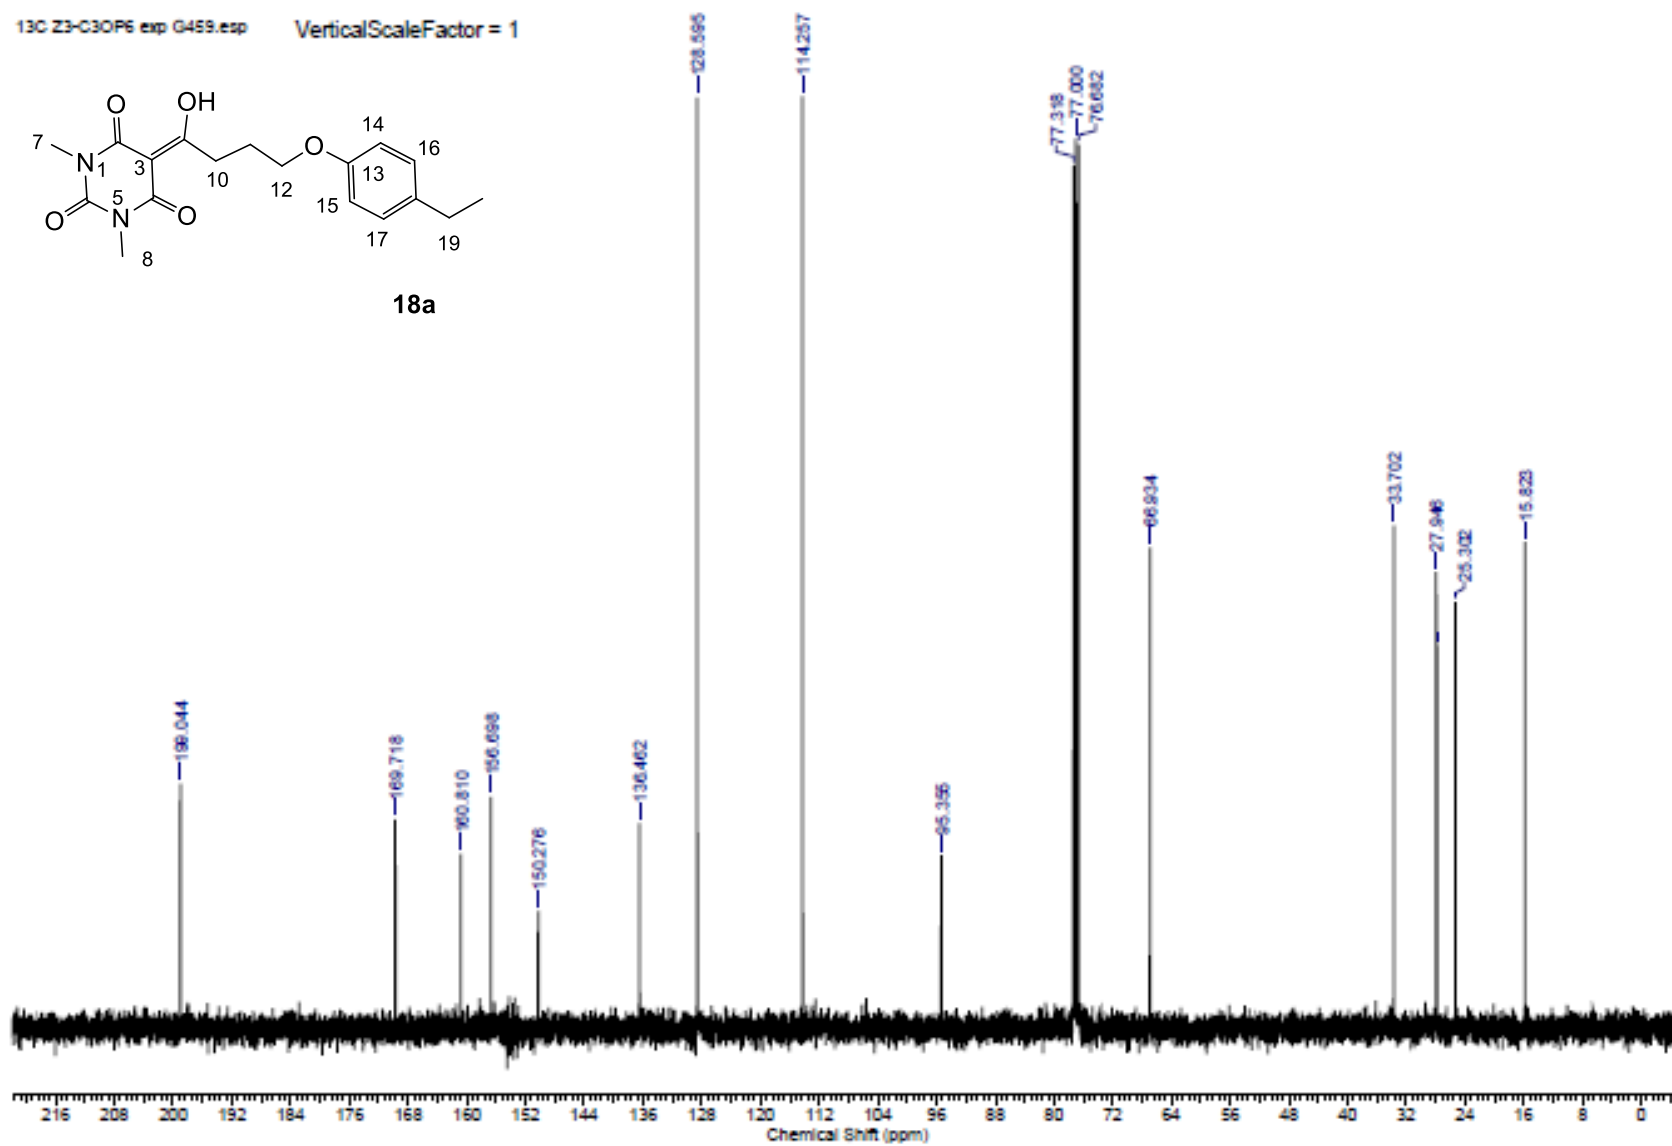



1H Z3-C3OP7 exp G510.esp

VerticalScaleFactor = 1

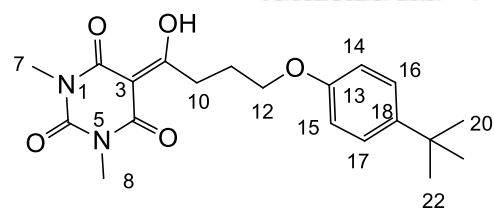

**18b**

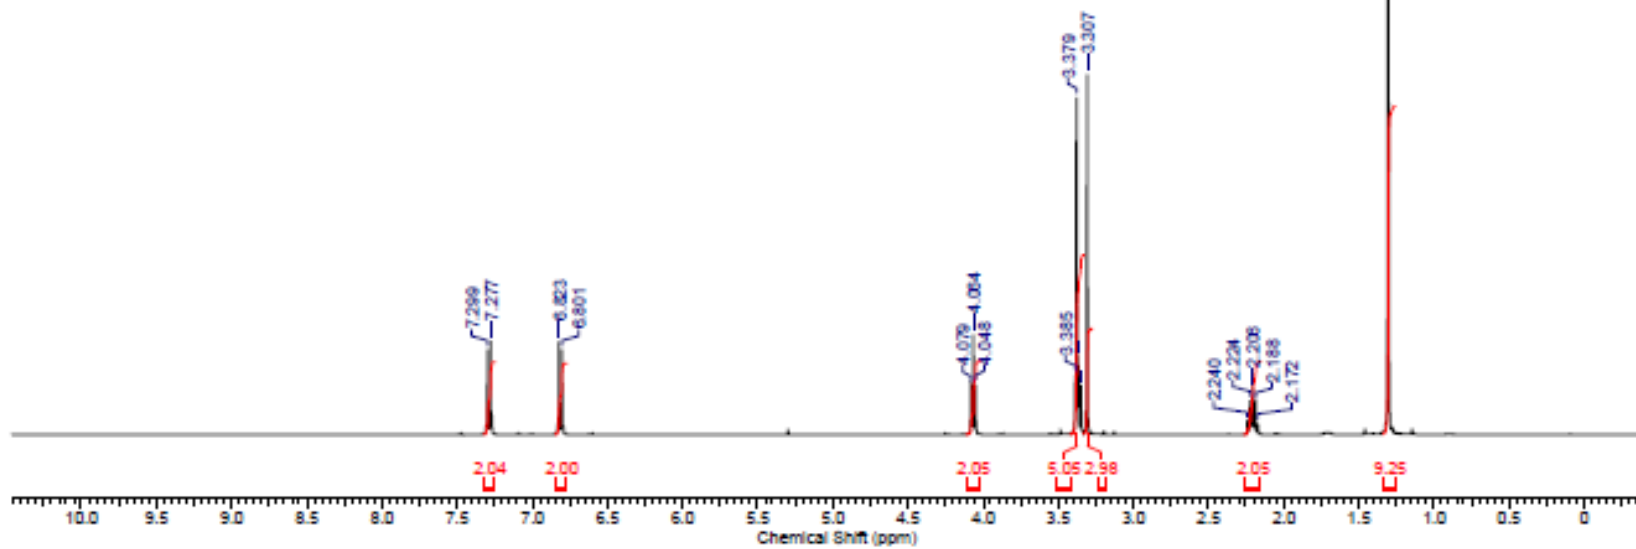

13C Z3-C3OP7 exp G510.esp

VerticalScaleFactor = 1

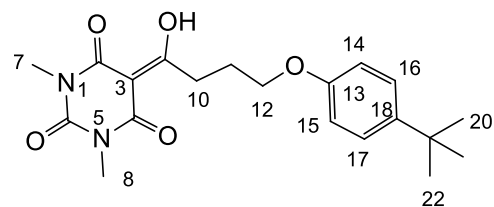

**18b**

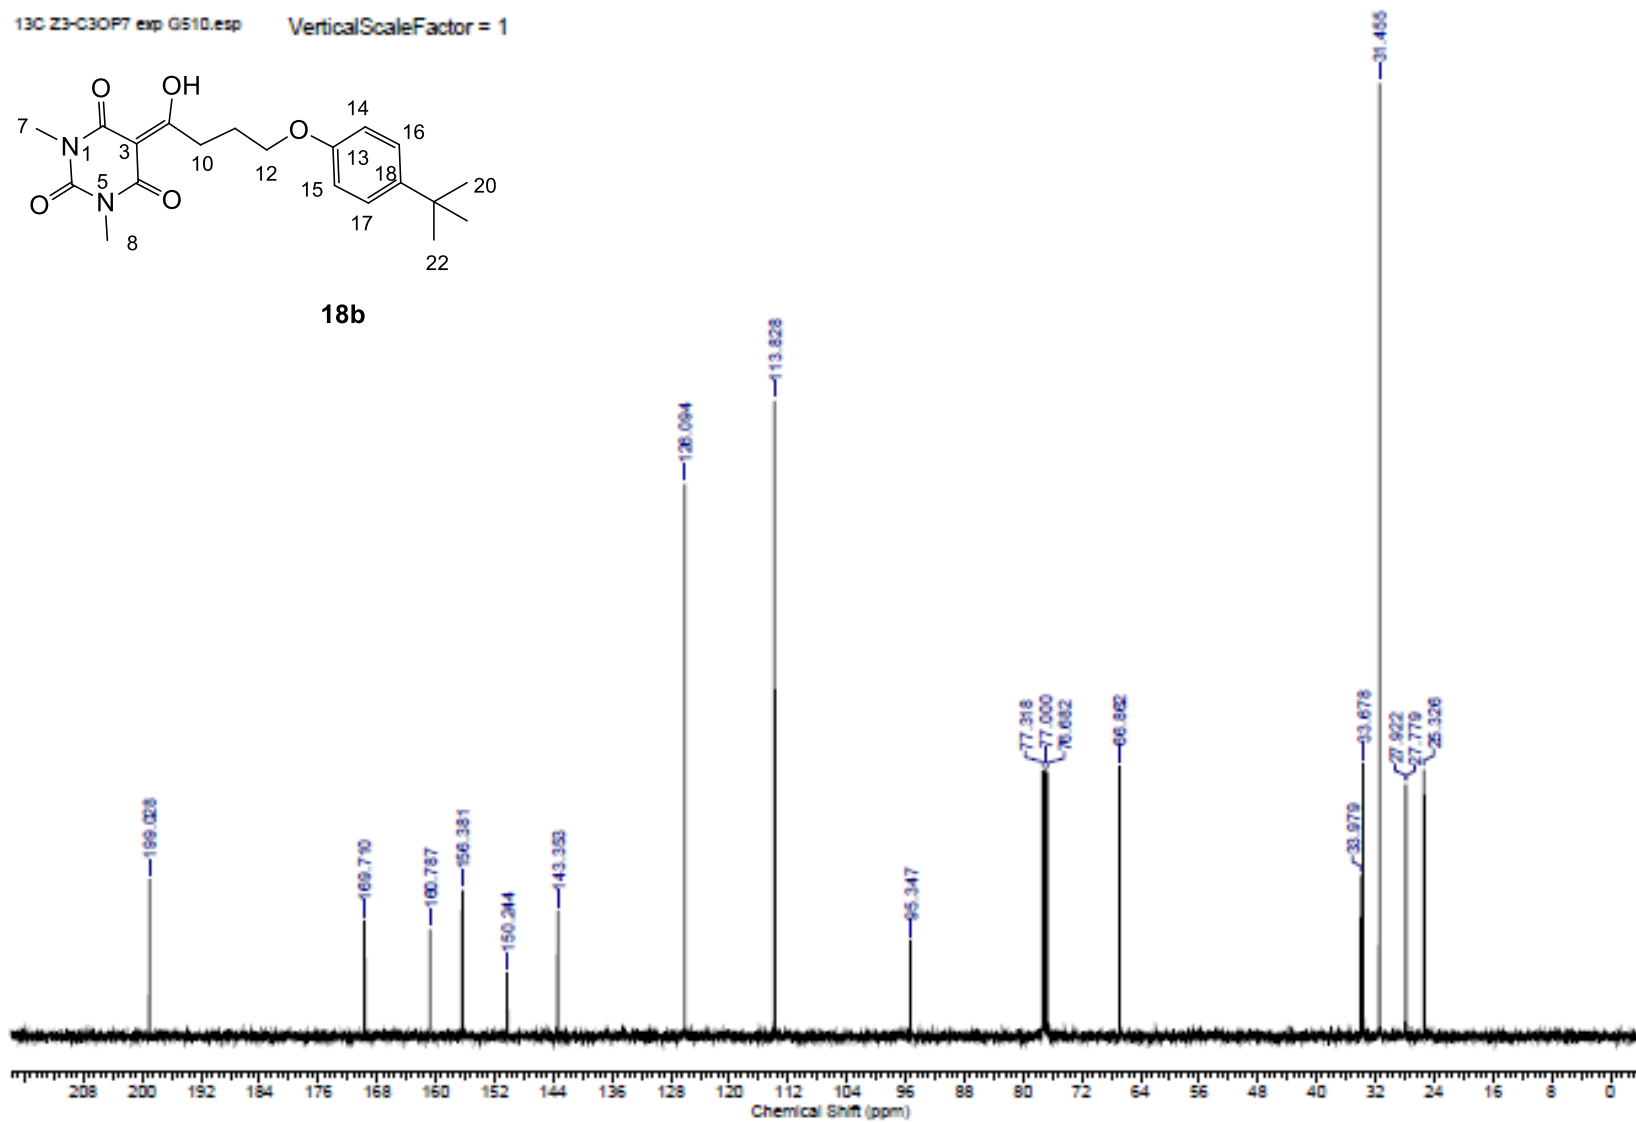

1H Z3-C3OP4 exp G450.exp

VerticalScaleFactor = 1

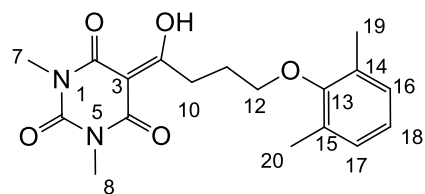

**18c**

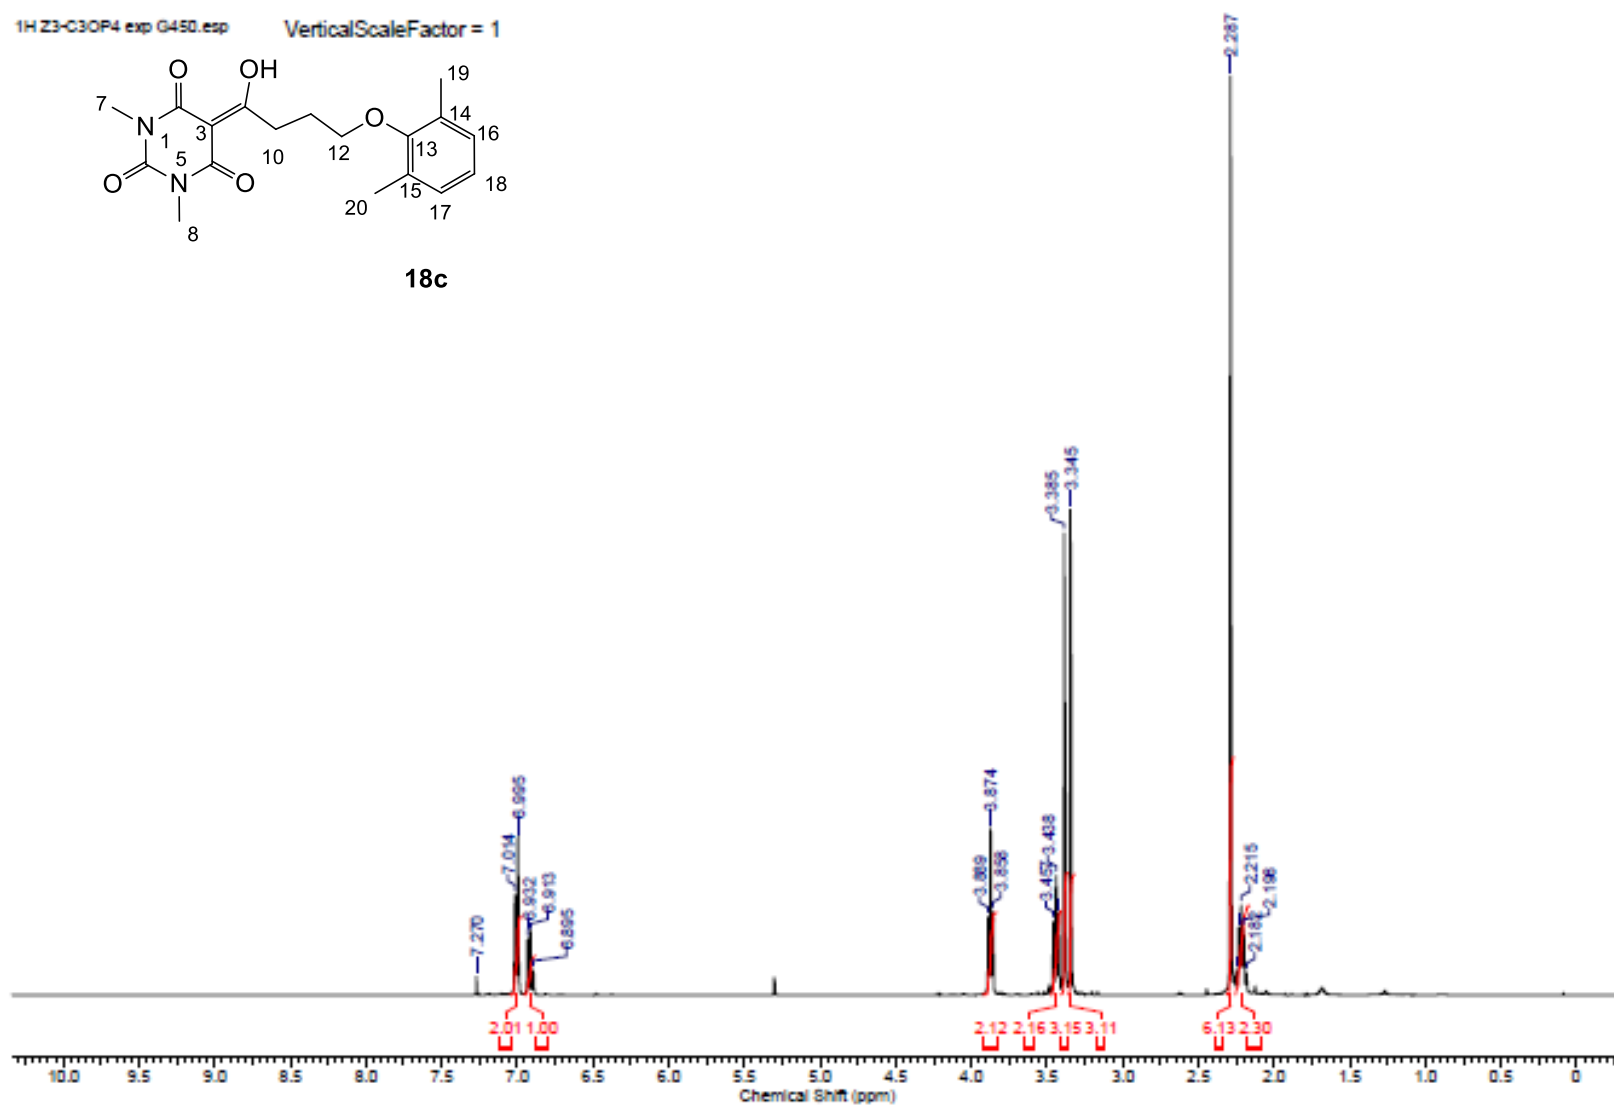

13C Z3-C3OP4 exp G450.exp

VerticalScaleFactor = 1

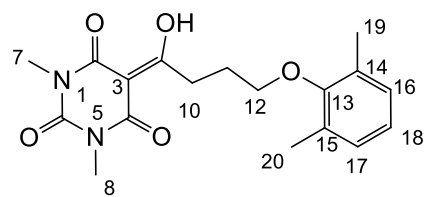

**18c**

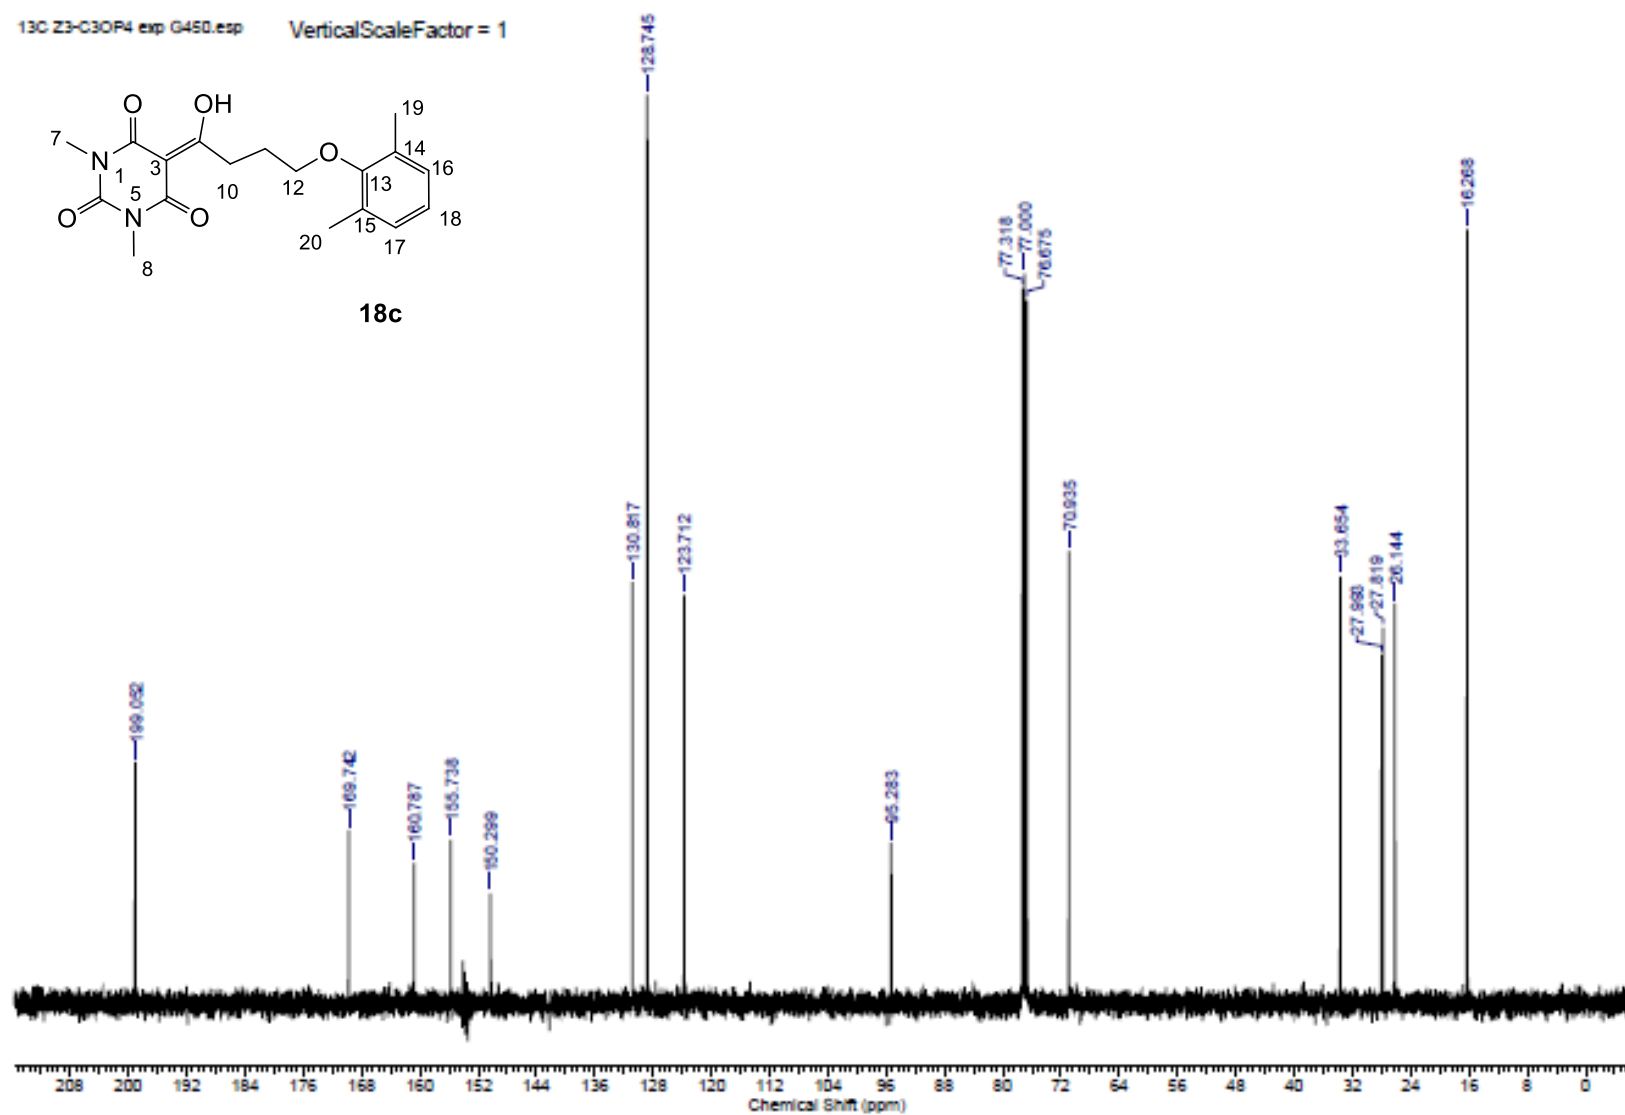

1H Z3-C3OP5 exp G460.exp

VerticalScaleFactor = 1

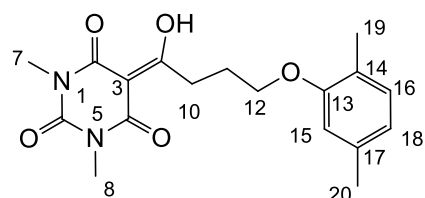

18d

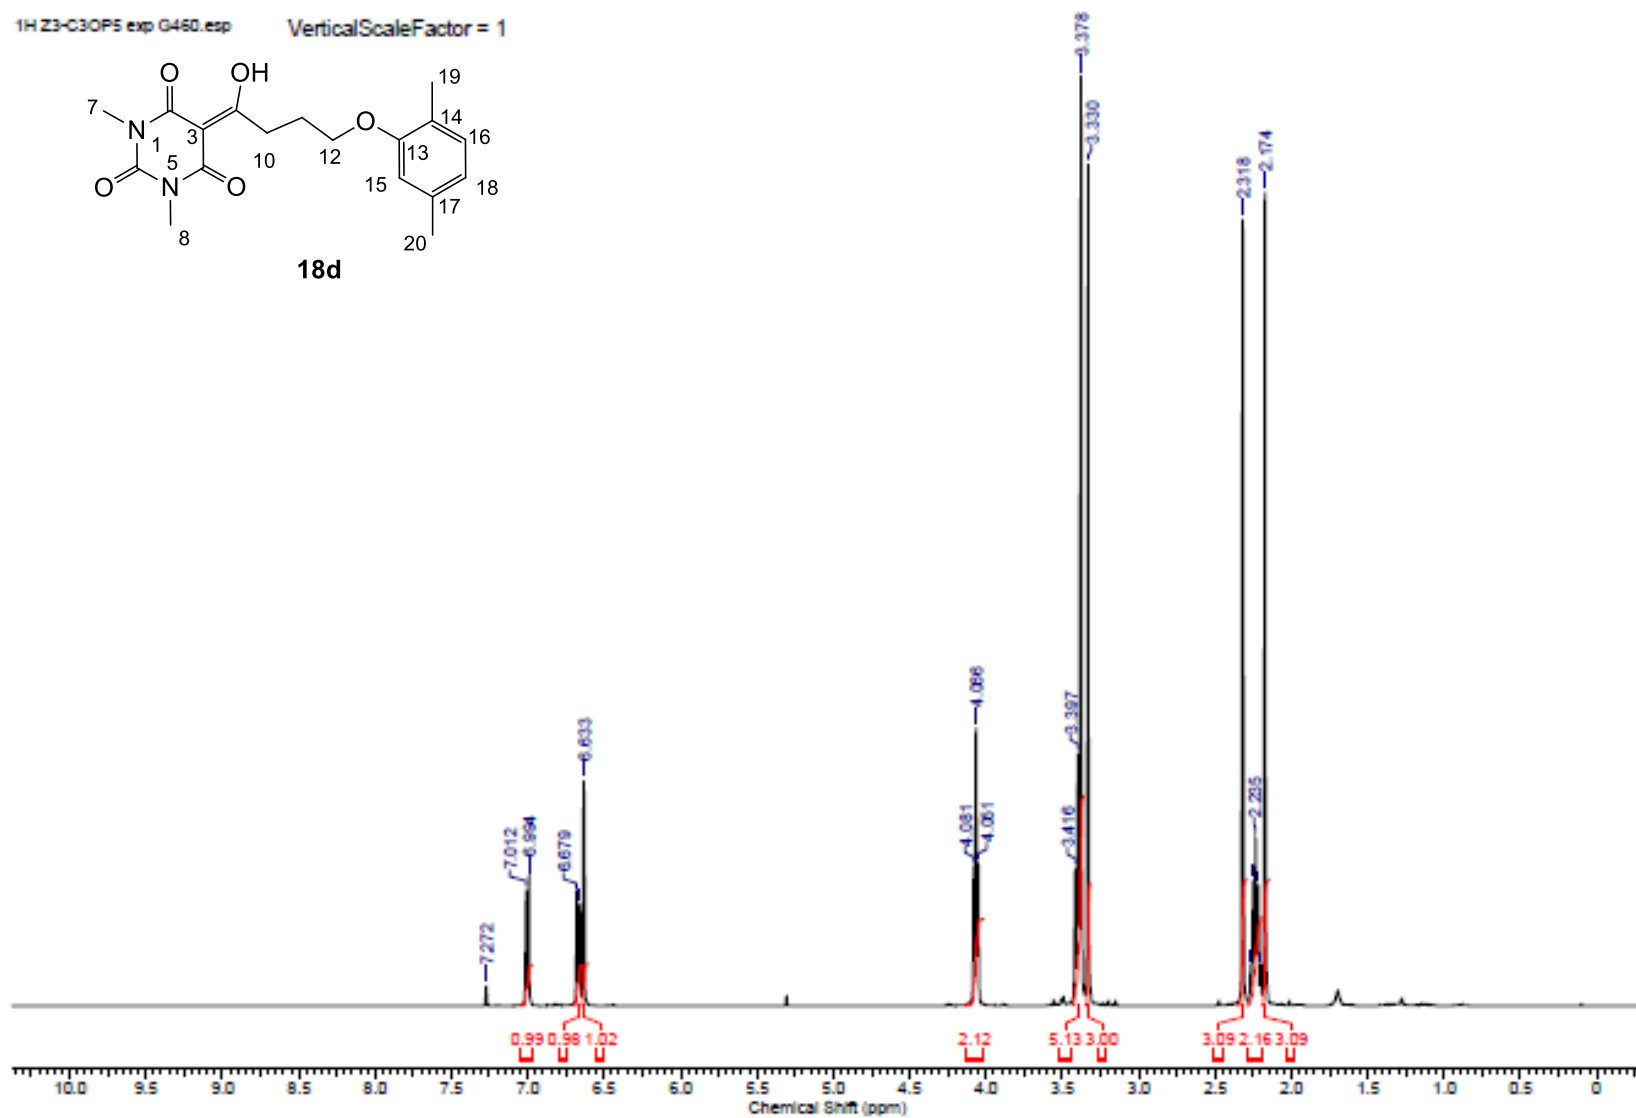

13C Z3-C3OP5 exp G460.esp

VerticalScaleFactor = 1

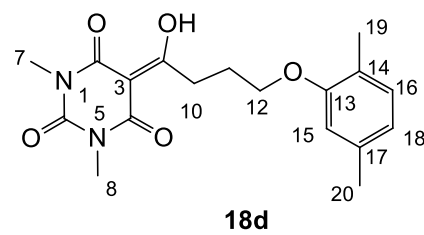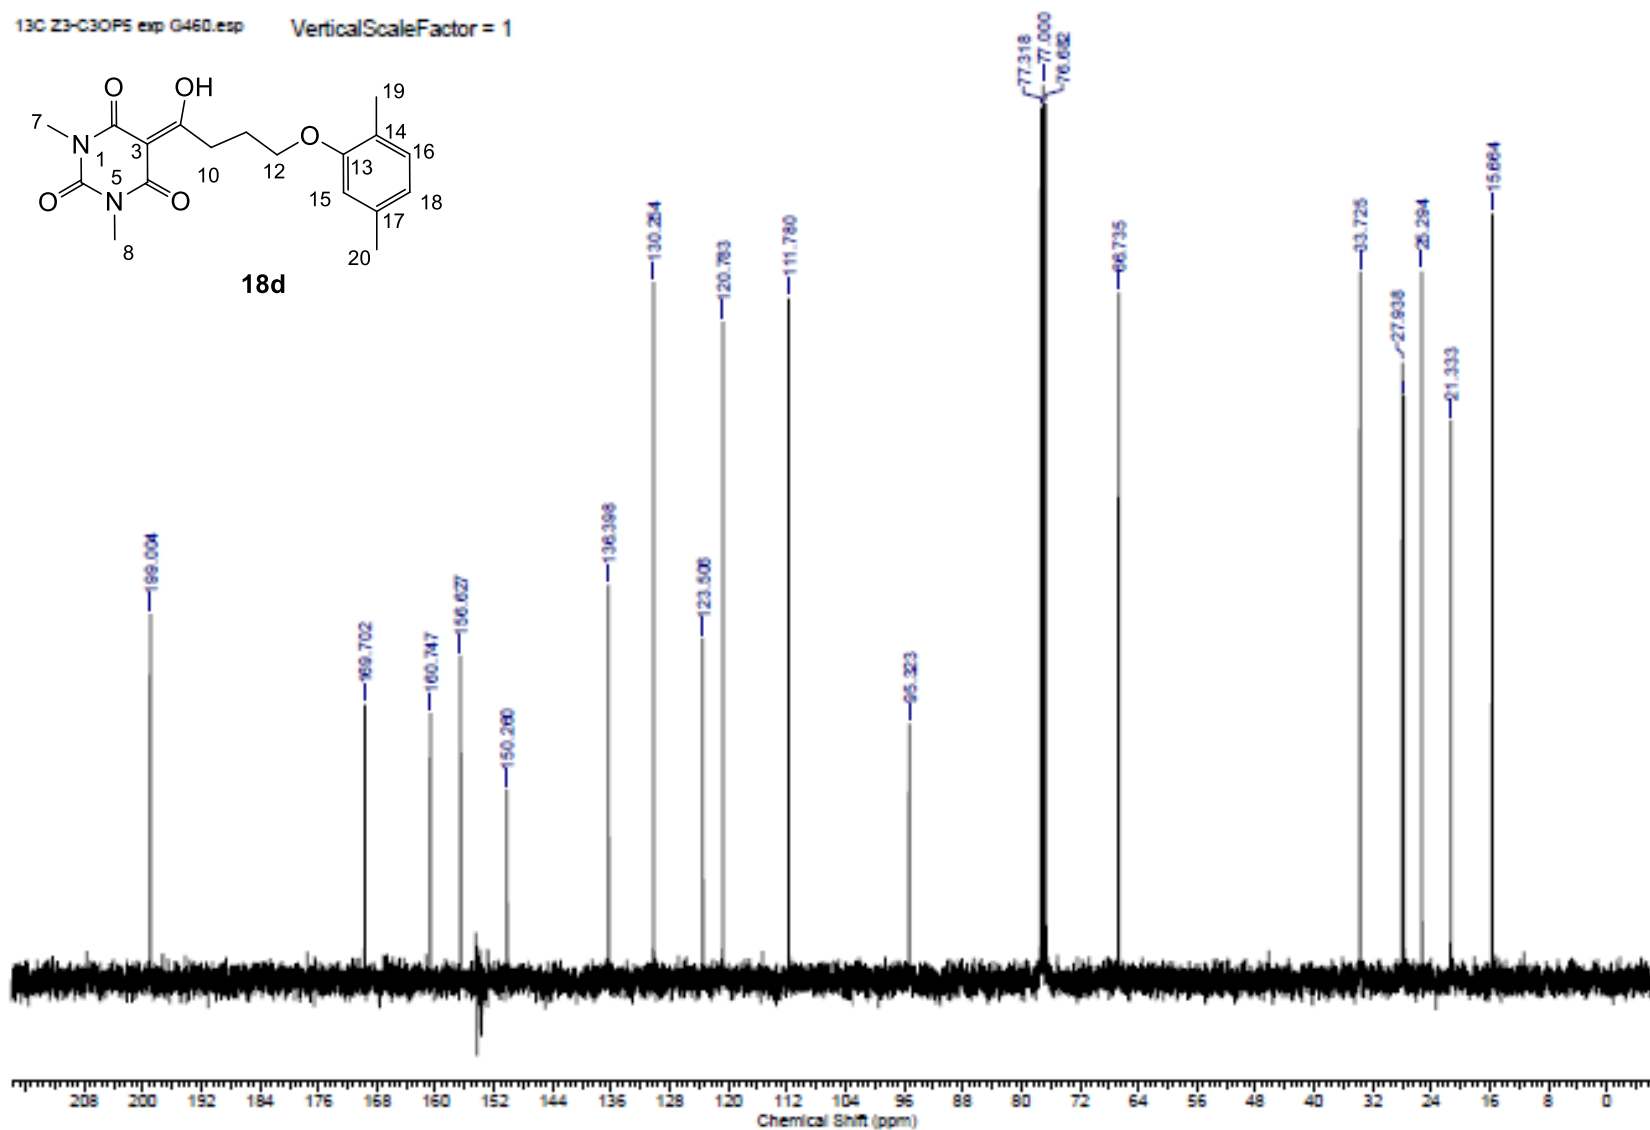

1H Z3-C3OP3 exp G435.esp

VerticalScaleFactor = 1

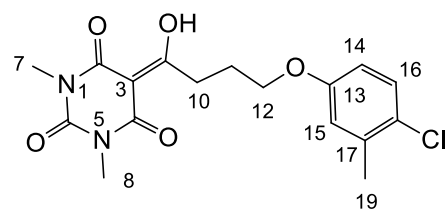

**18e**

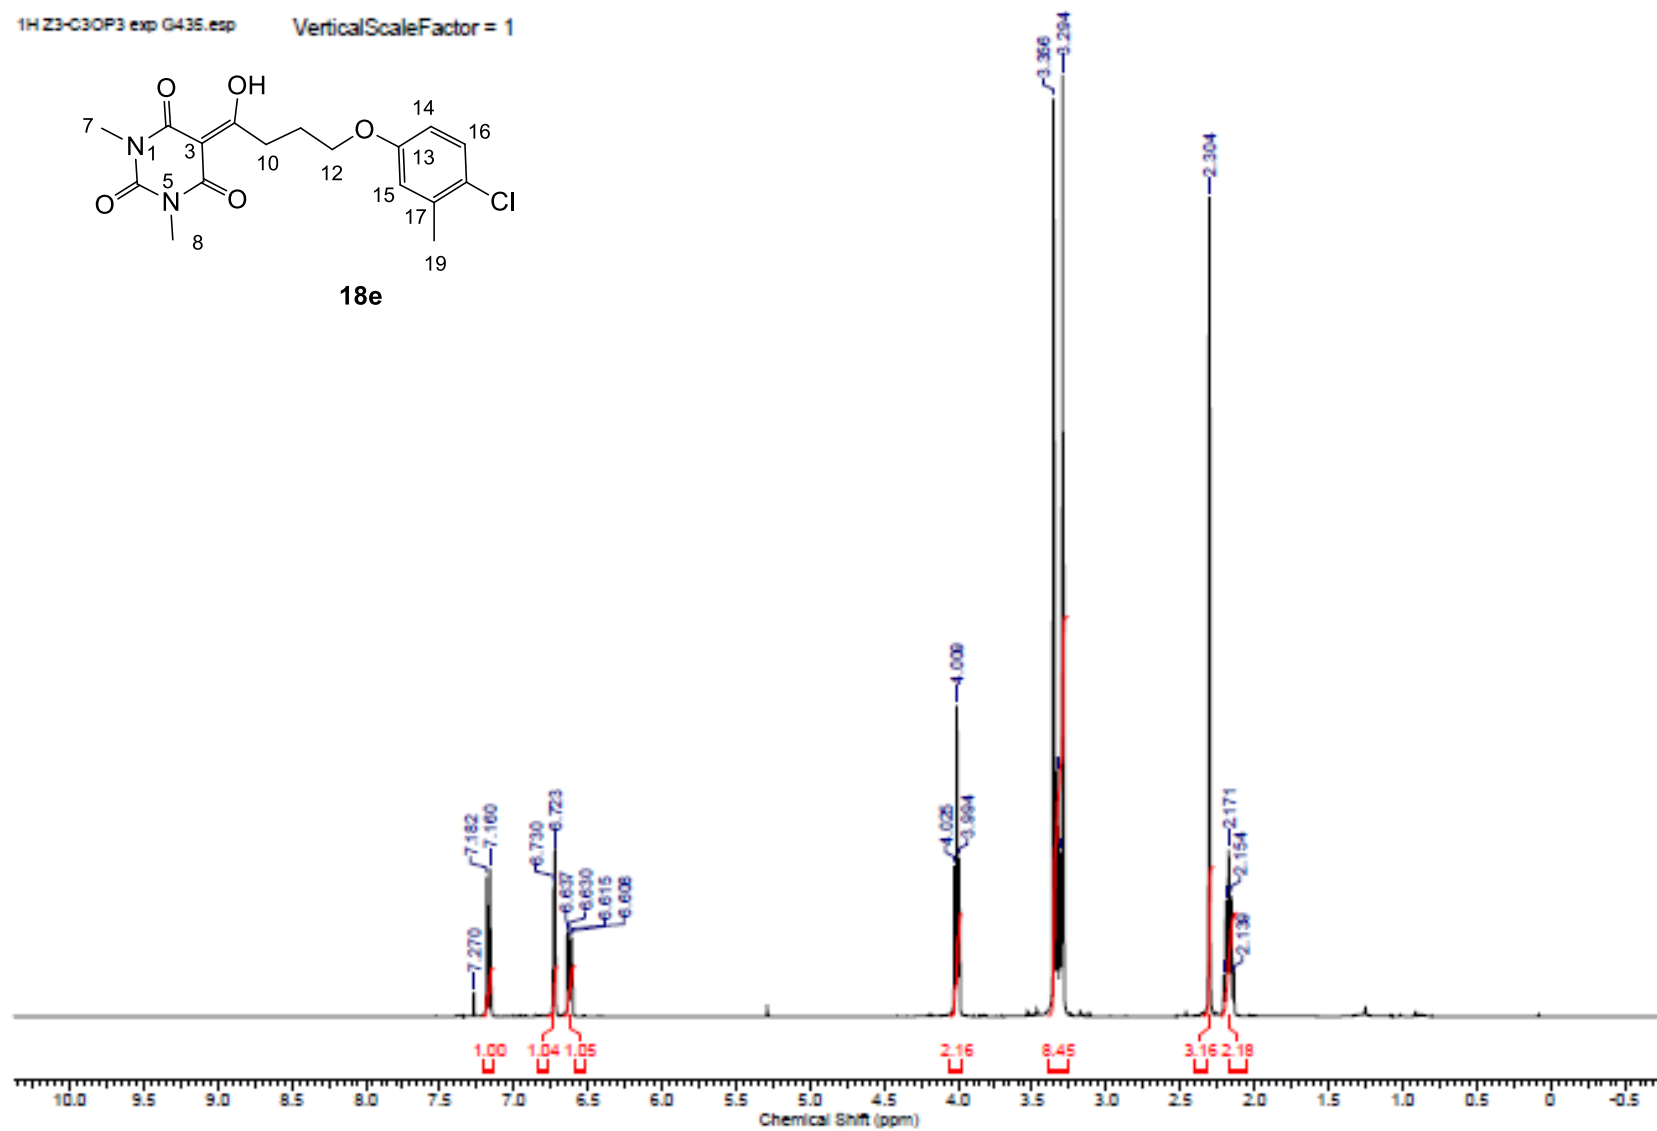

13C Z3-C3OP3 exp G435.esp

VerticalScaleFactor = 1

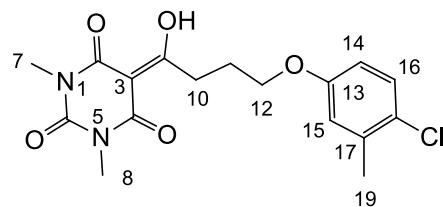

**18e**

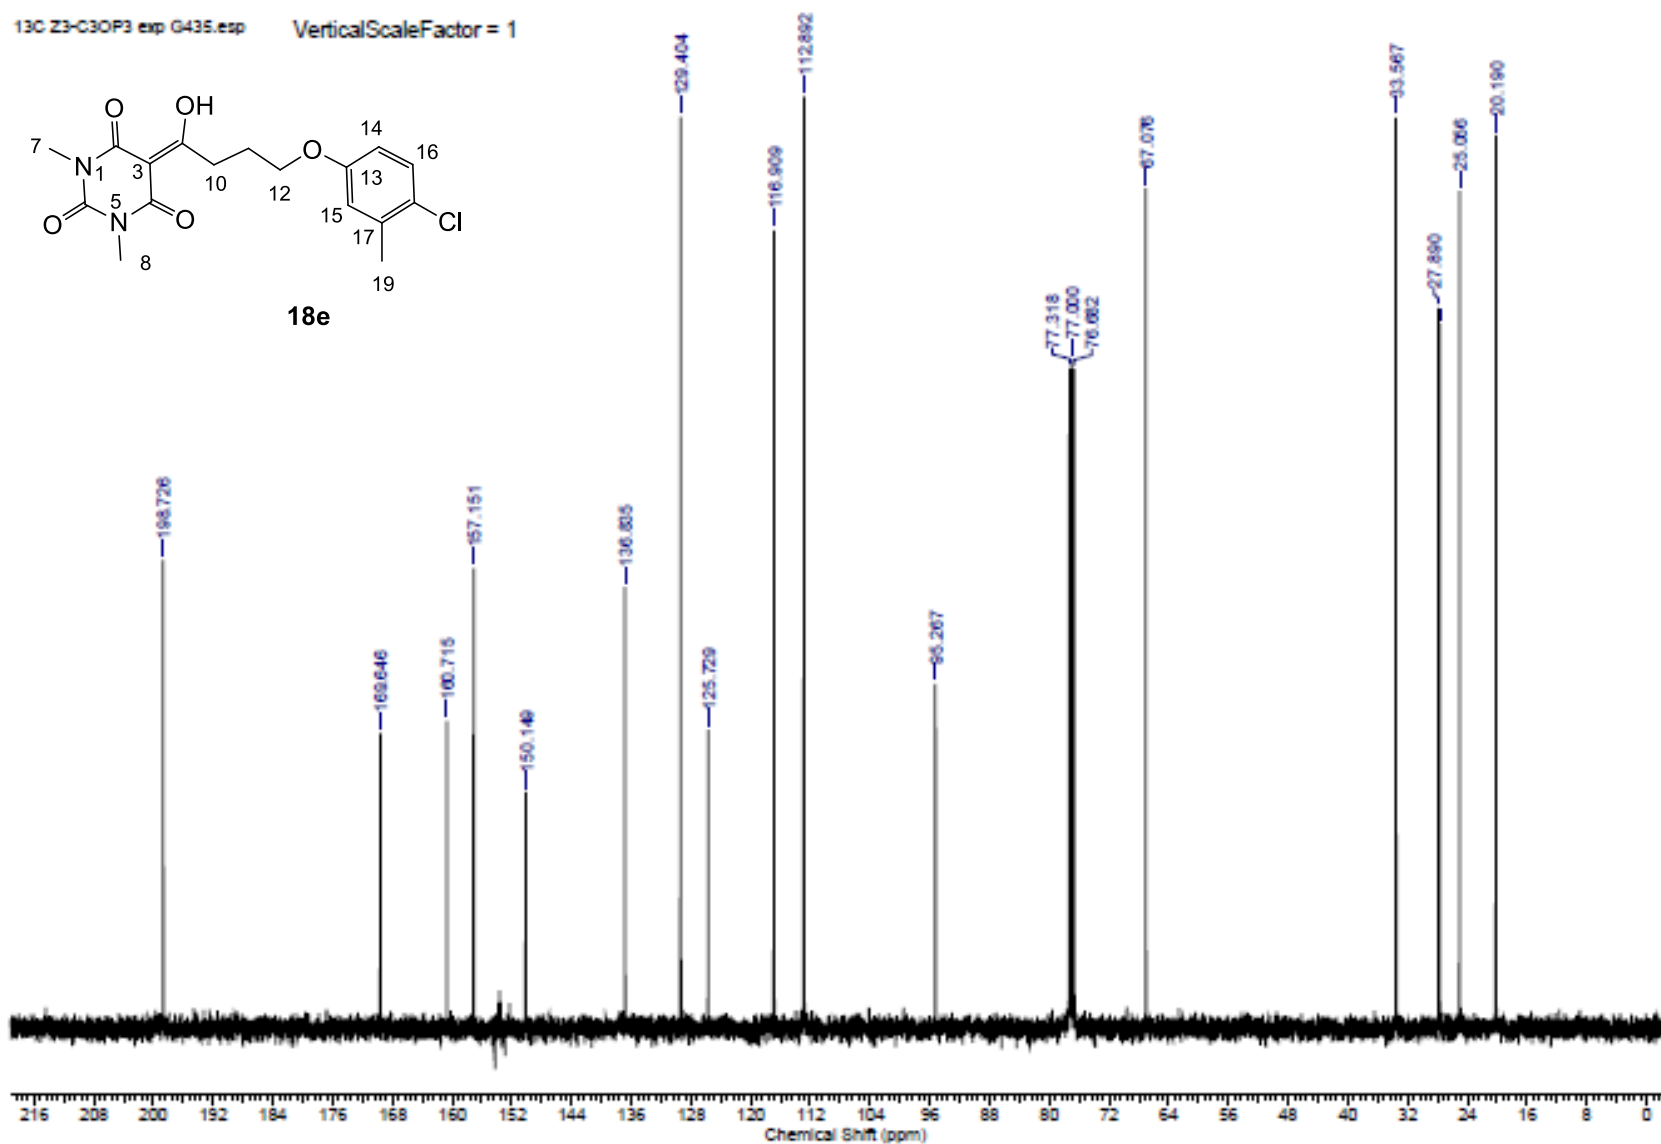



1H ZTA3-C3PC exp G402.exp

VerticalScaleFactor = 1

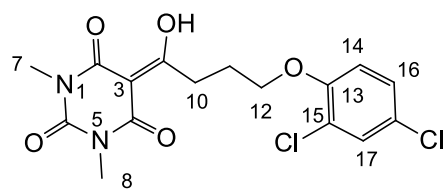

**18f**

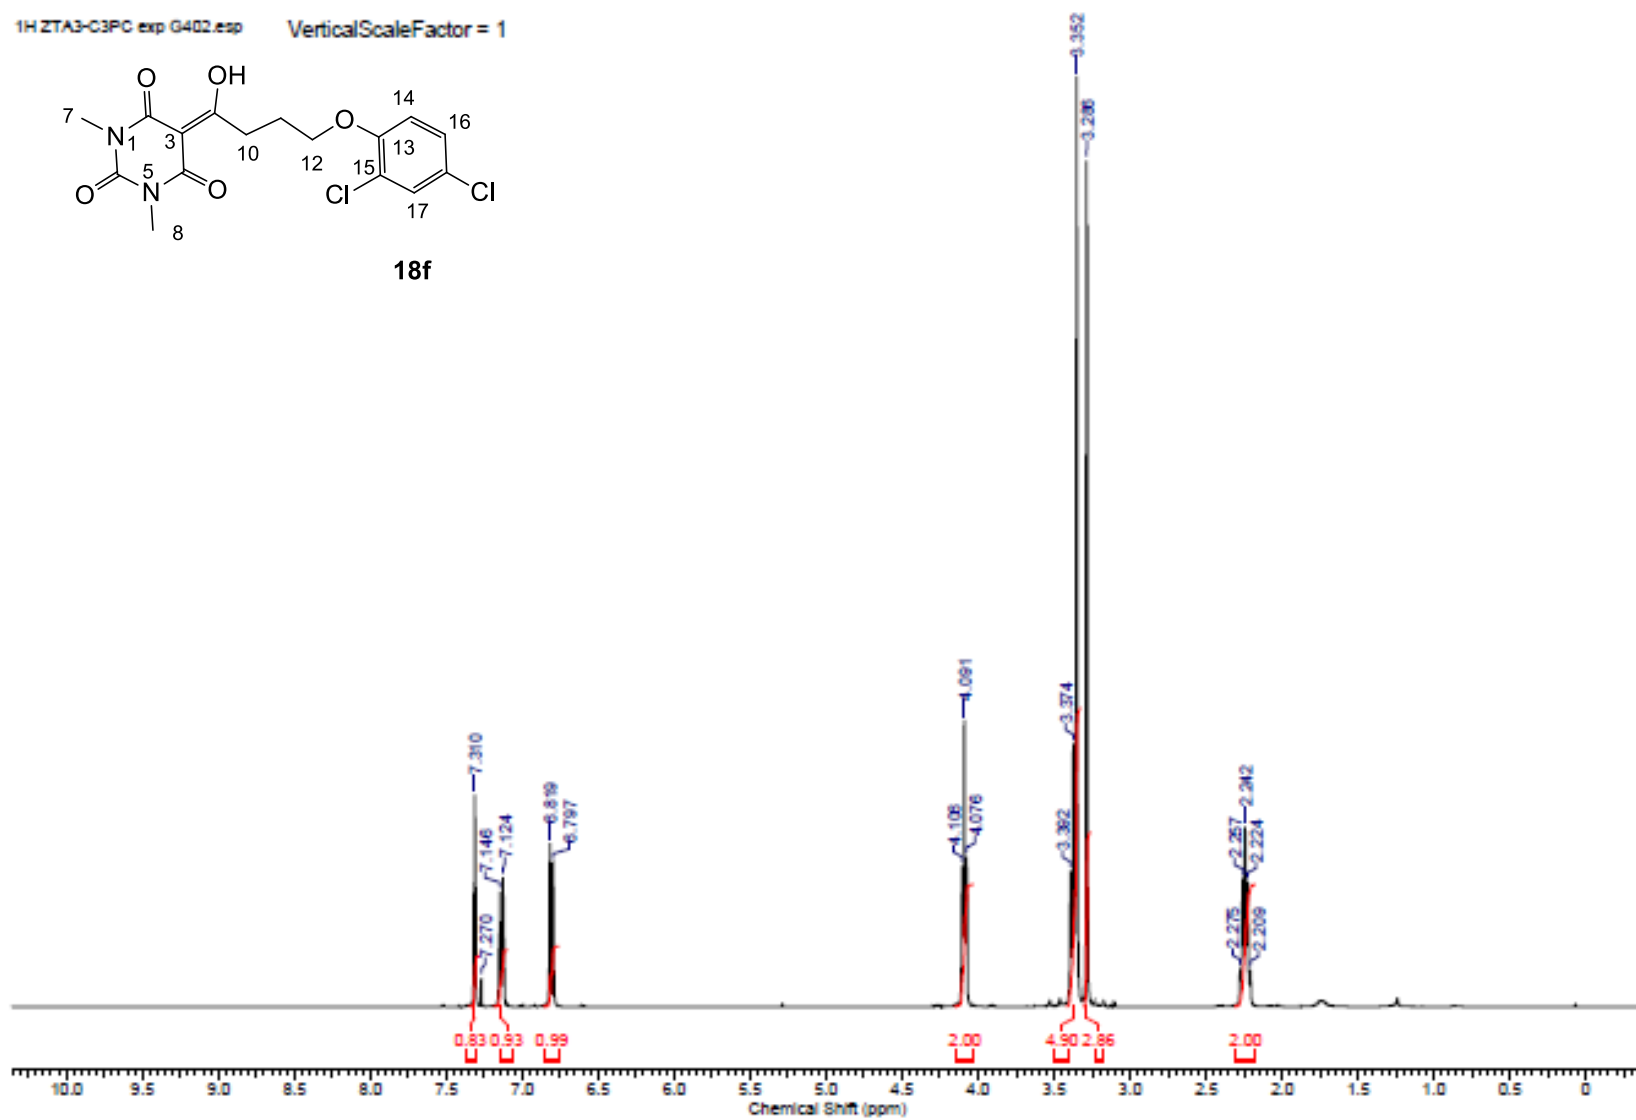

13C ZTA3-C3PC exp G402.esp VerticalScaleFactor = 1

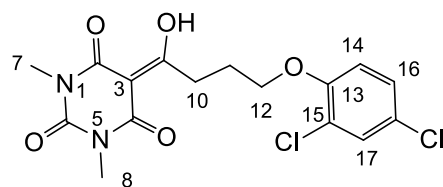

18f

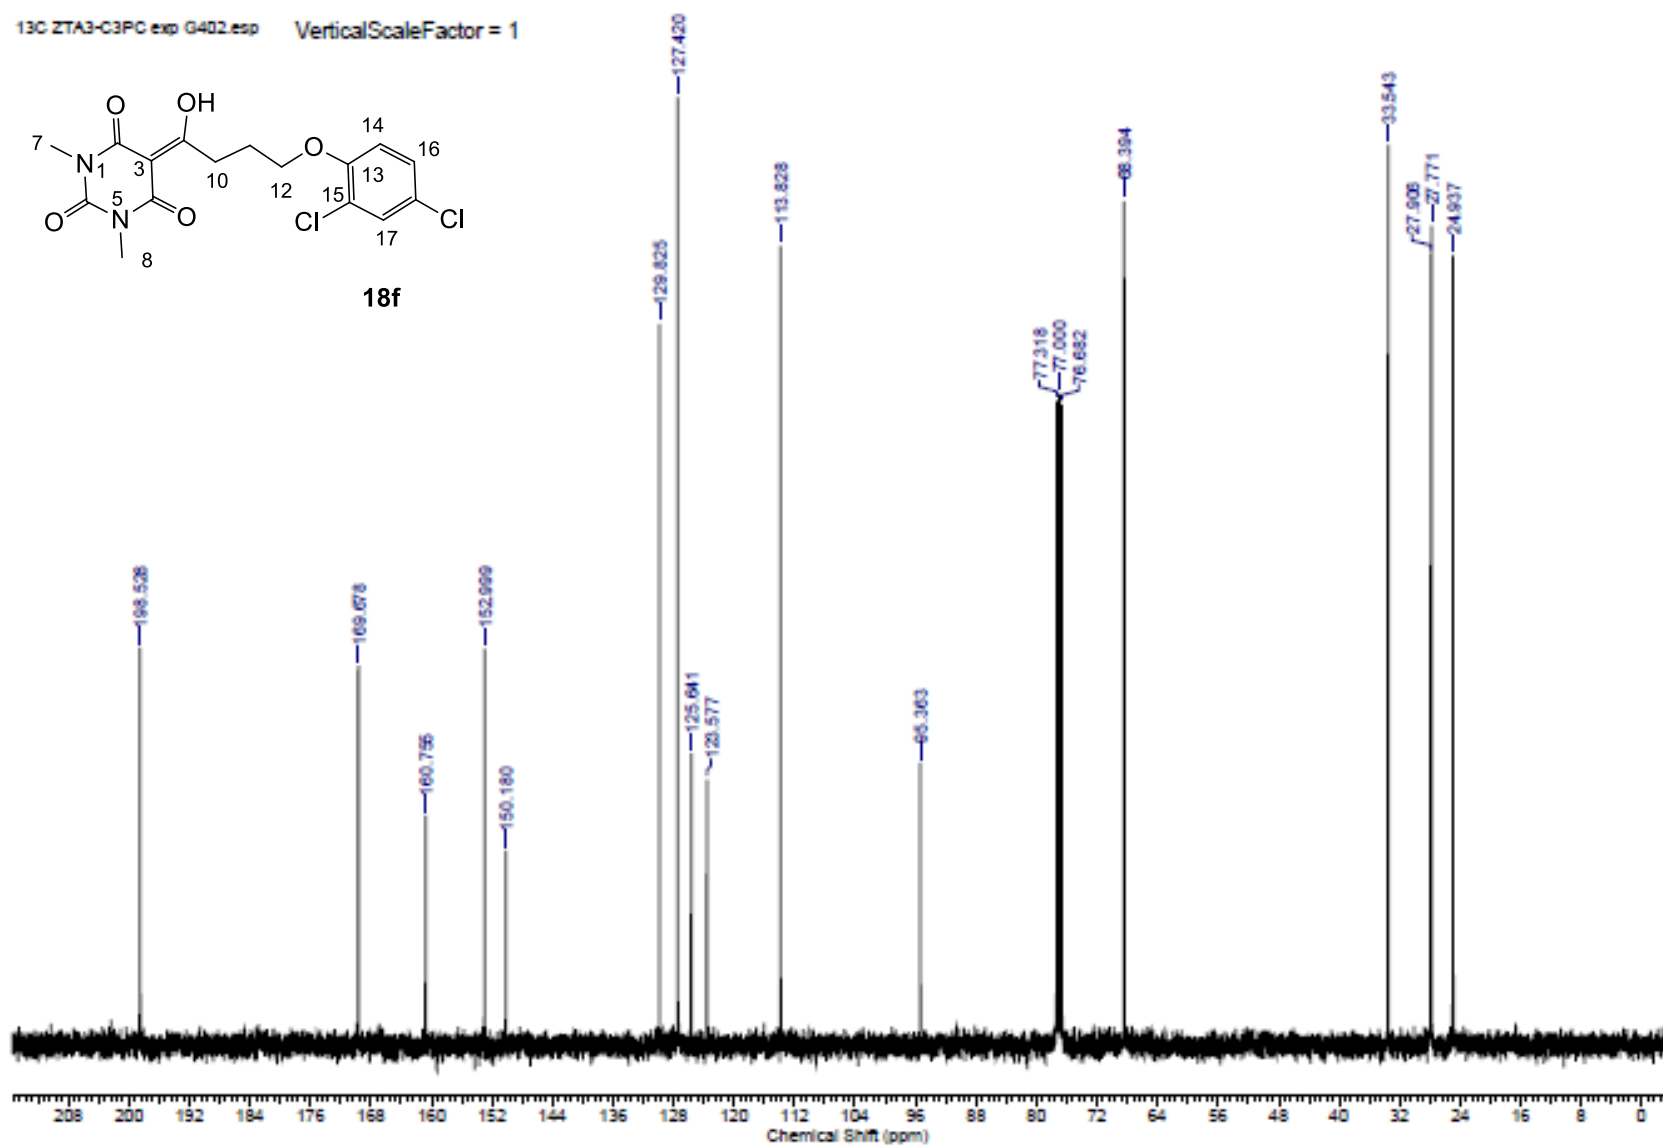

1H.ZTA3-C3OP2 exp G418.esp VerticalScaleFactor = 1

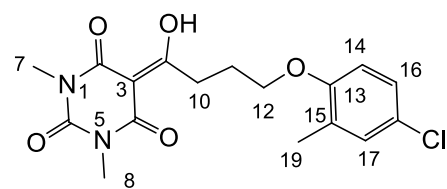

**18g**

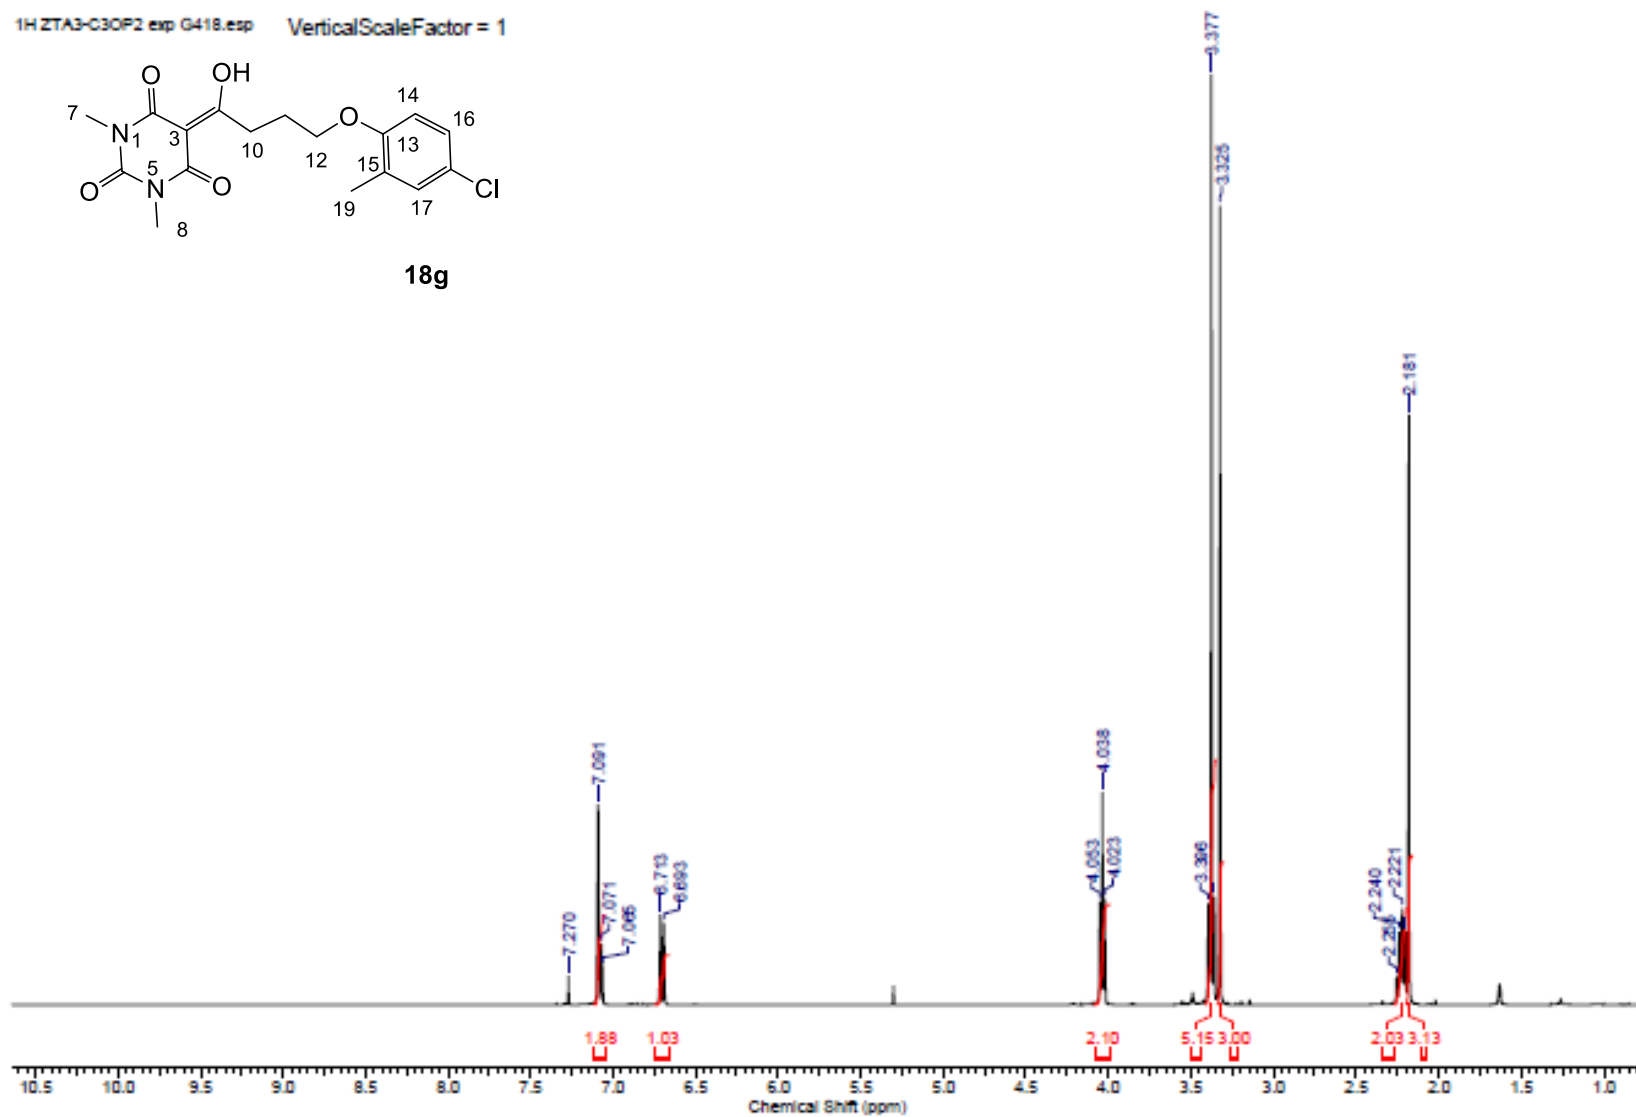

13C ZTAS-C3OP2 exp G418.exp VerticalScaleFactor = 1

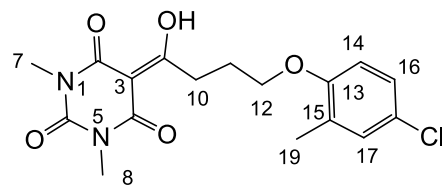

**18g**

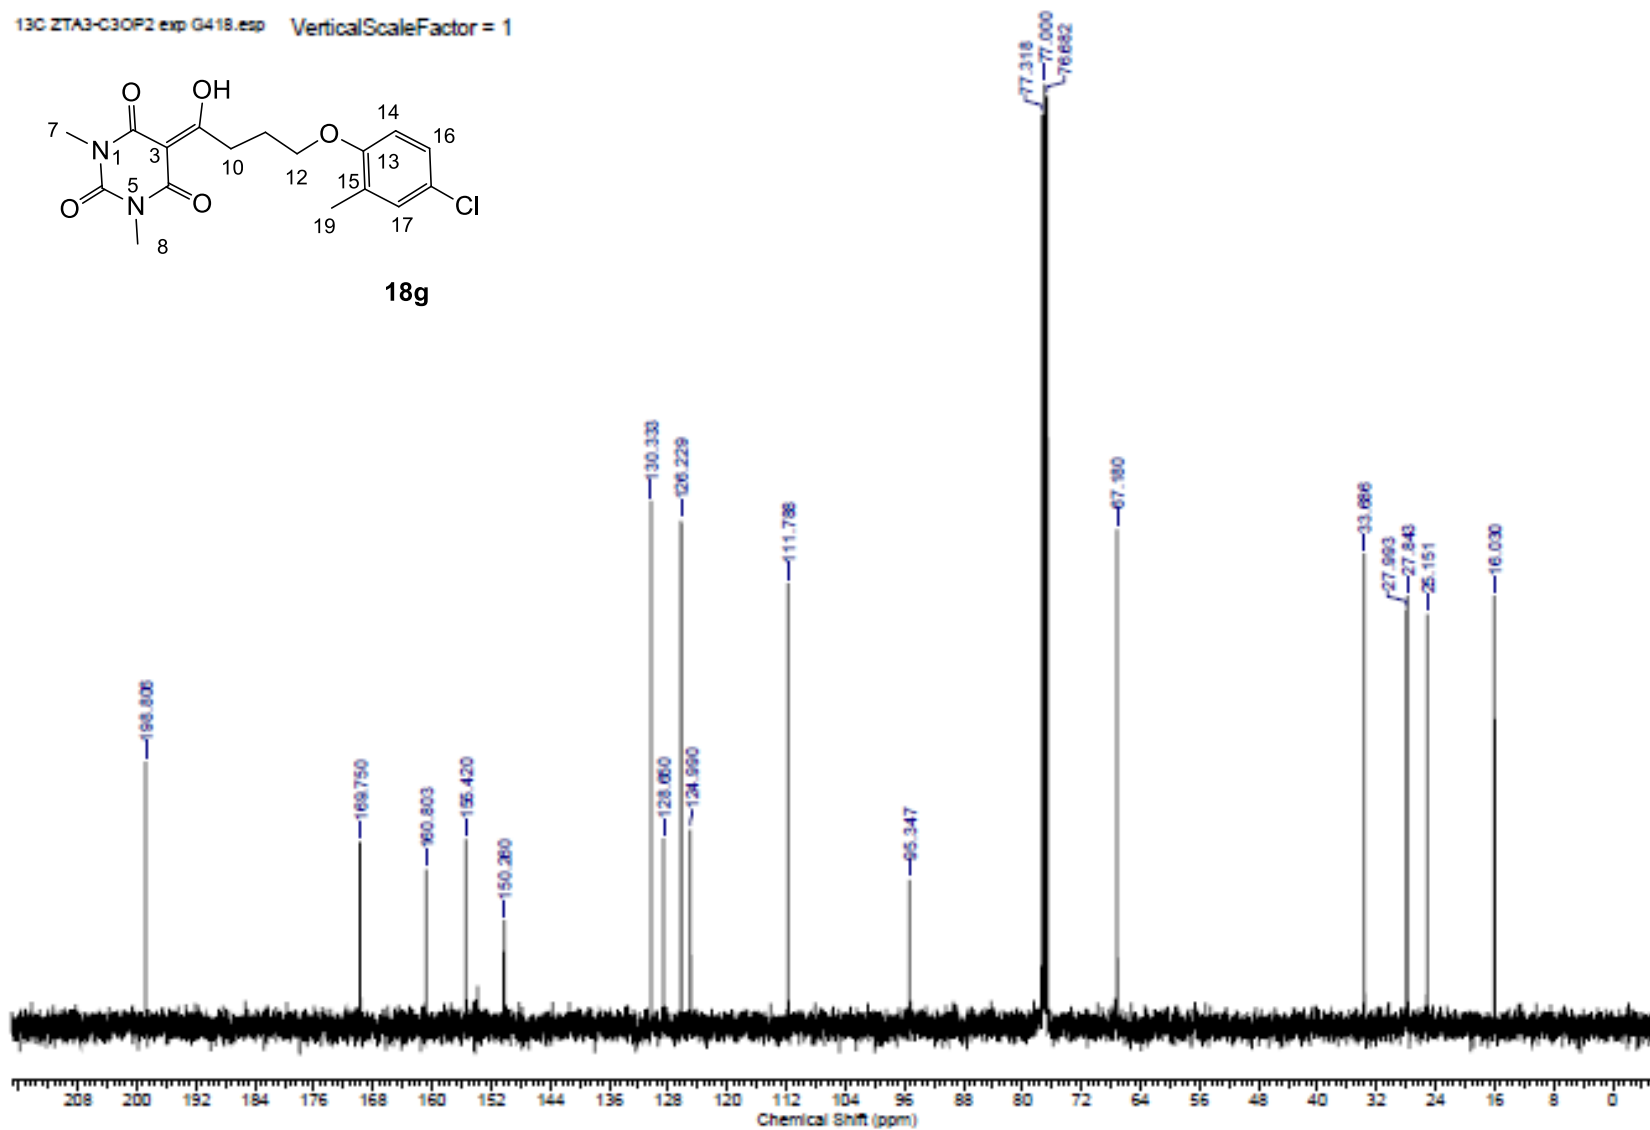

1H Z8-C3OP2 exp G531.esp

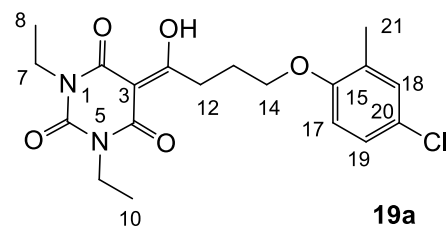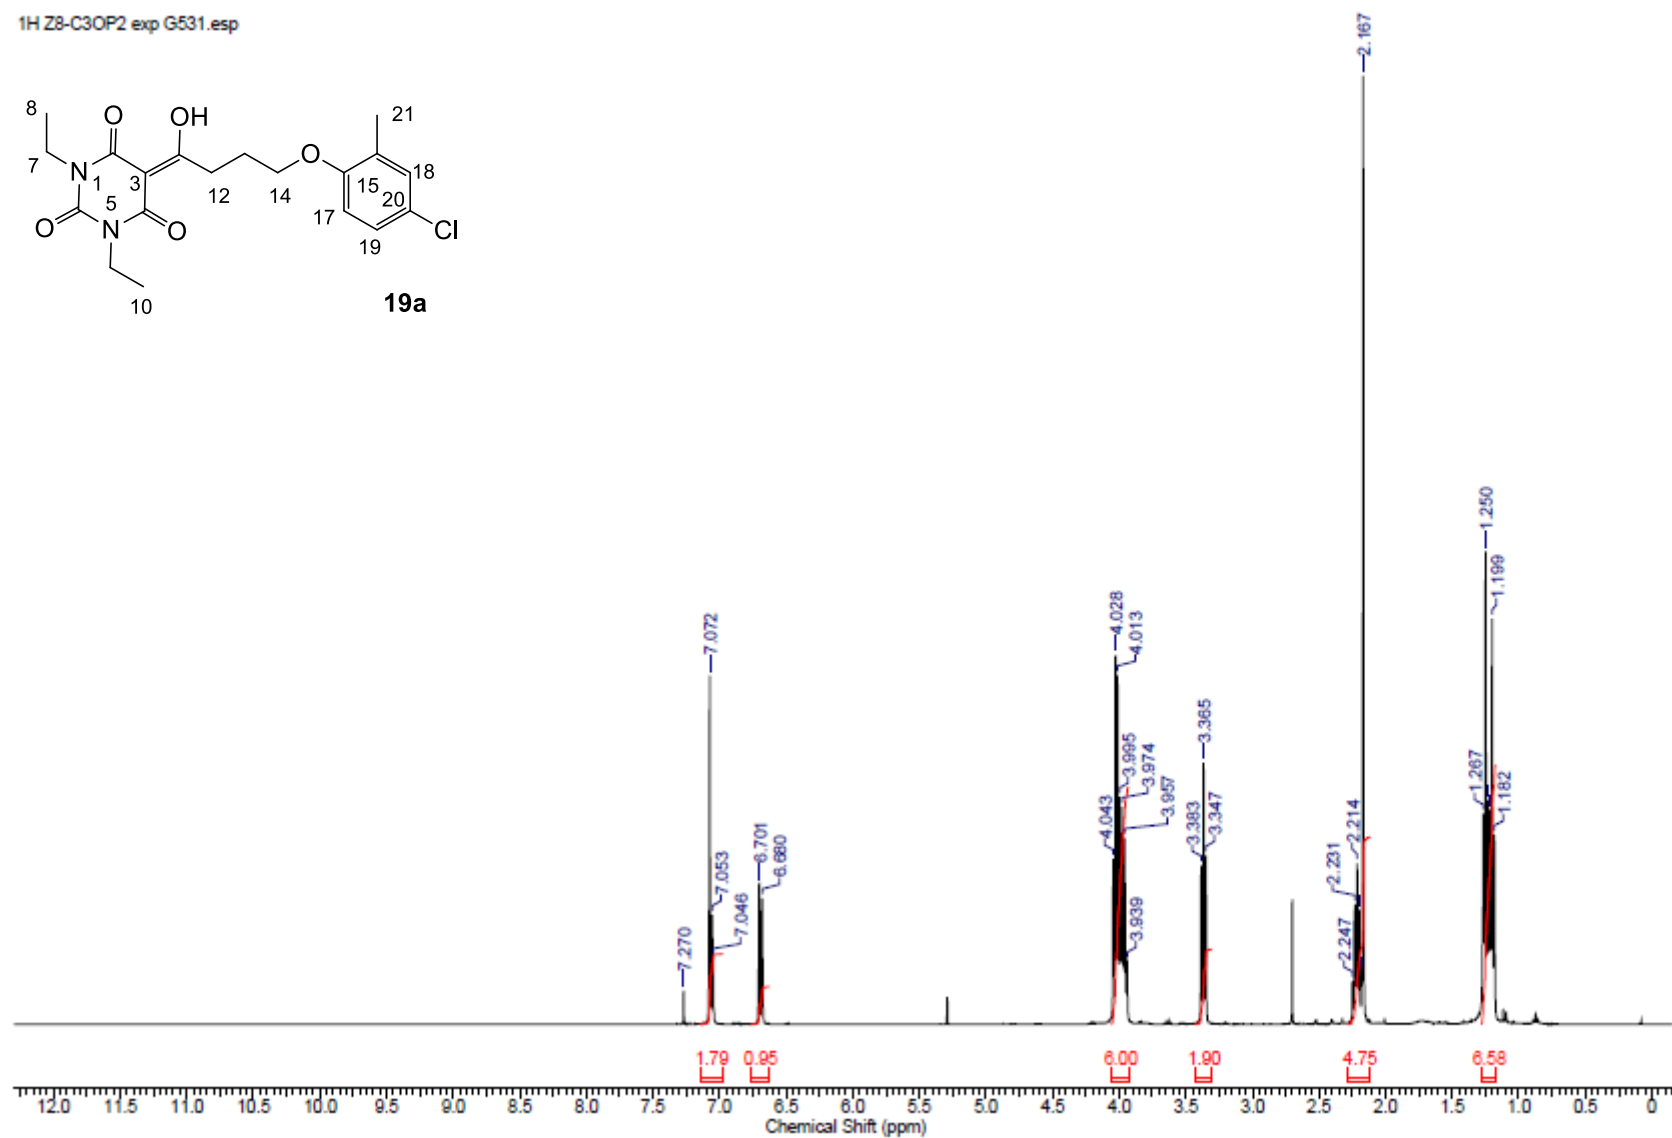

13C Z8-C3OP2 exp G531.esp

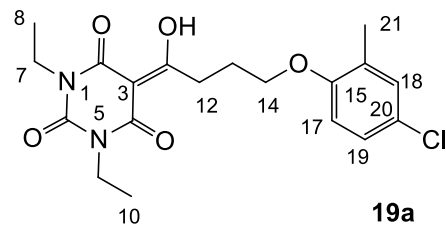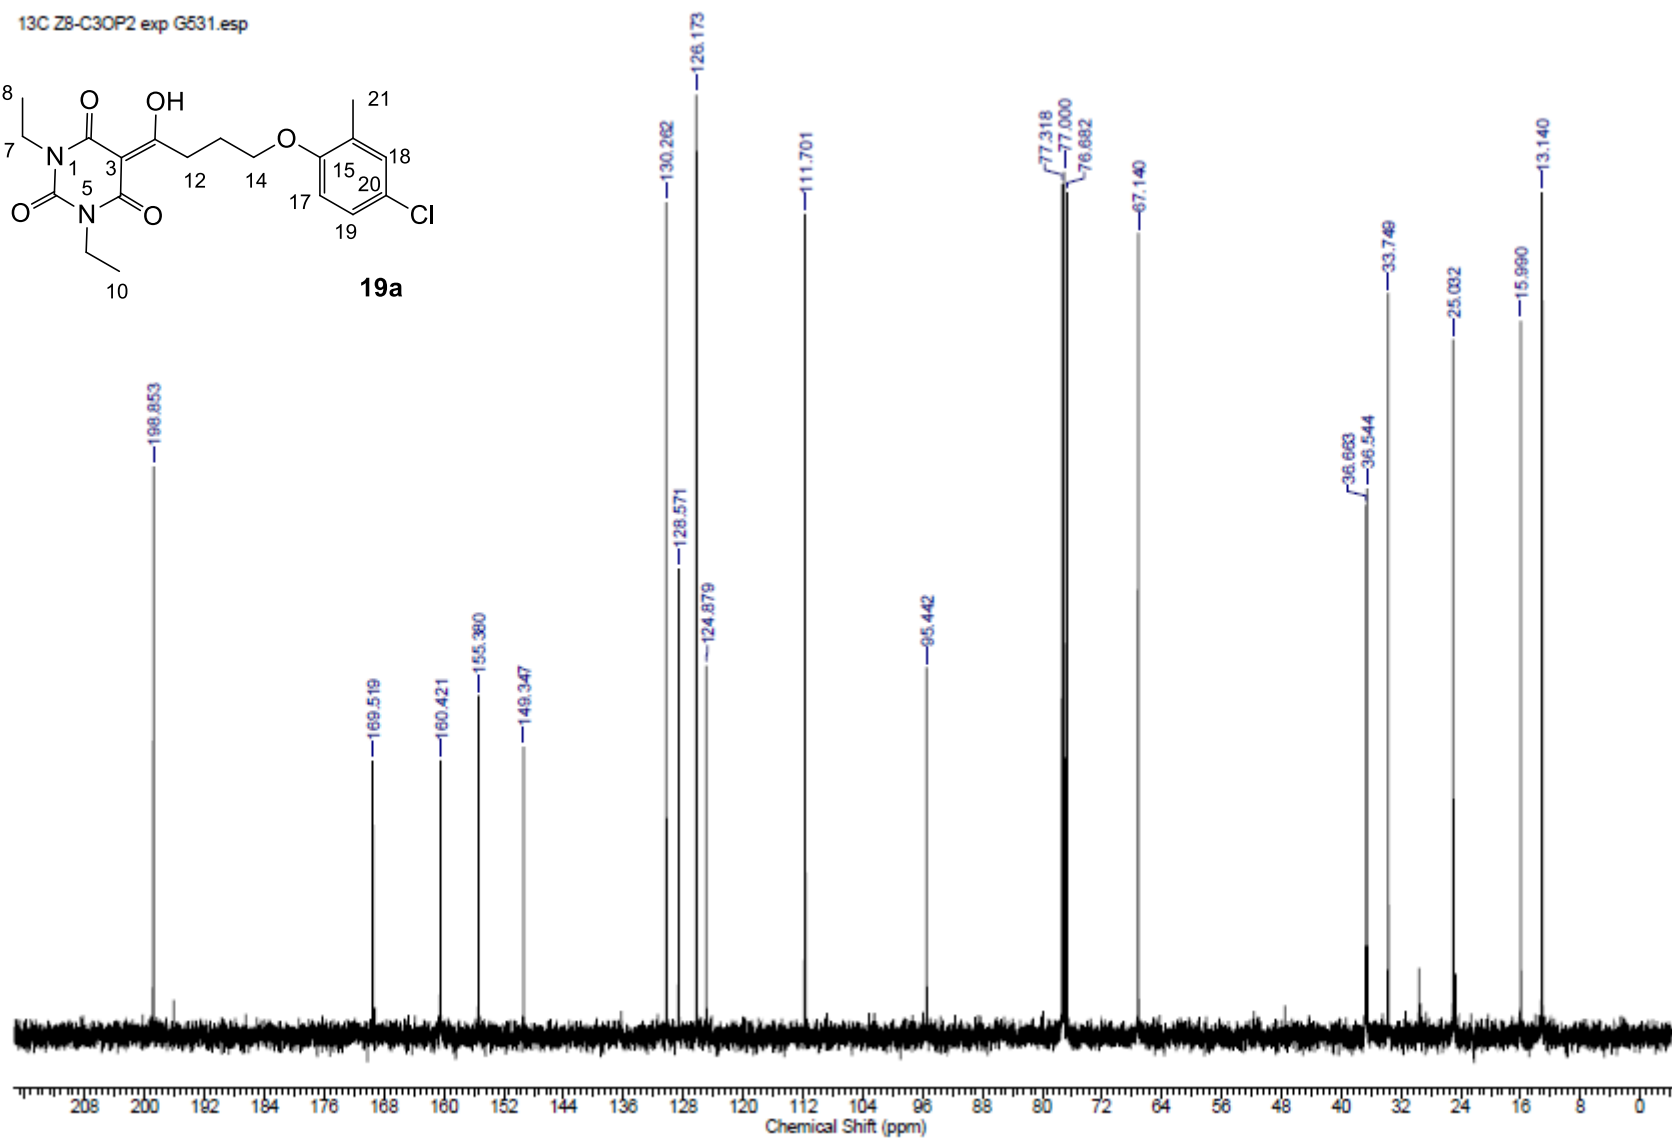

1H Z8-C3OP8 exp G535.esp

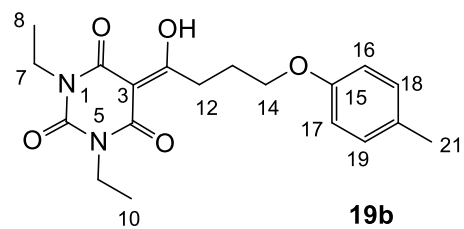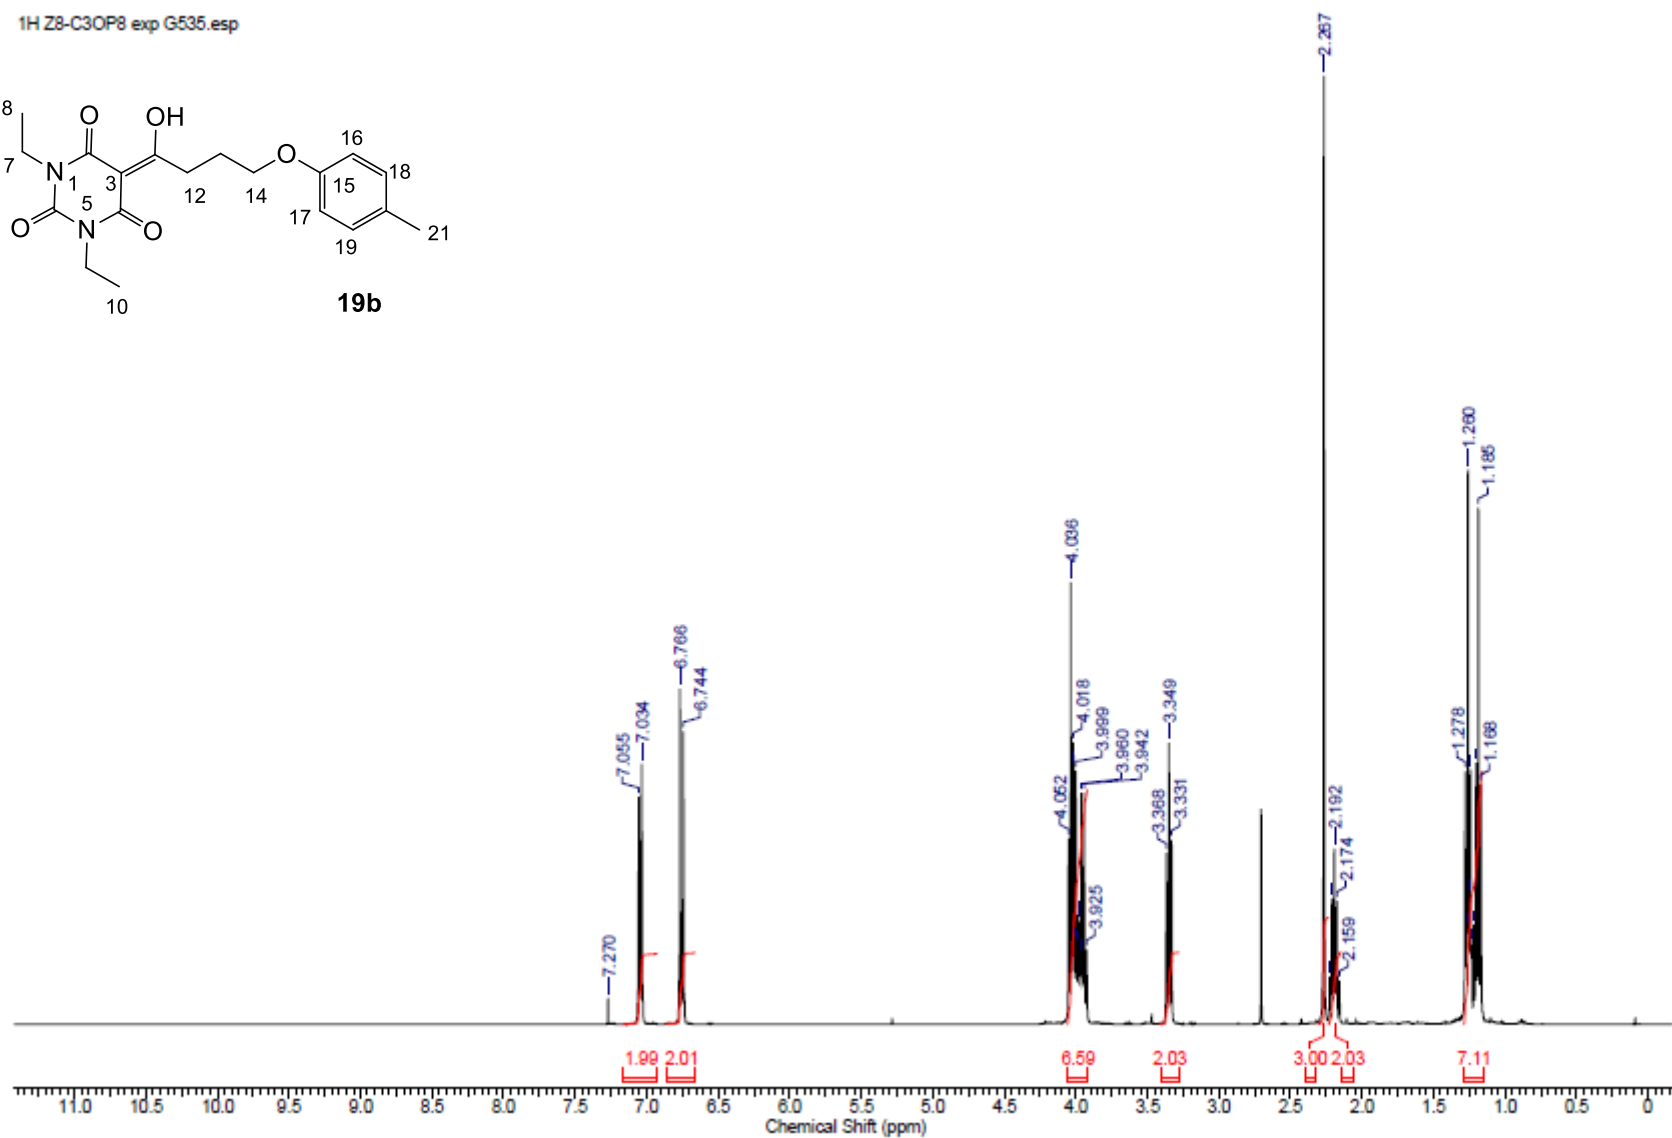

13C Z8-C3OP8 exp G535.esp

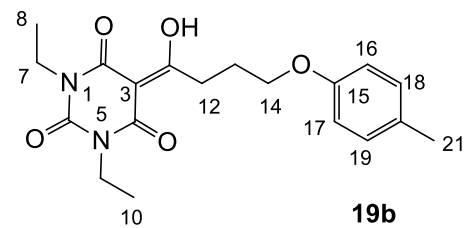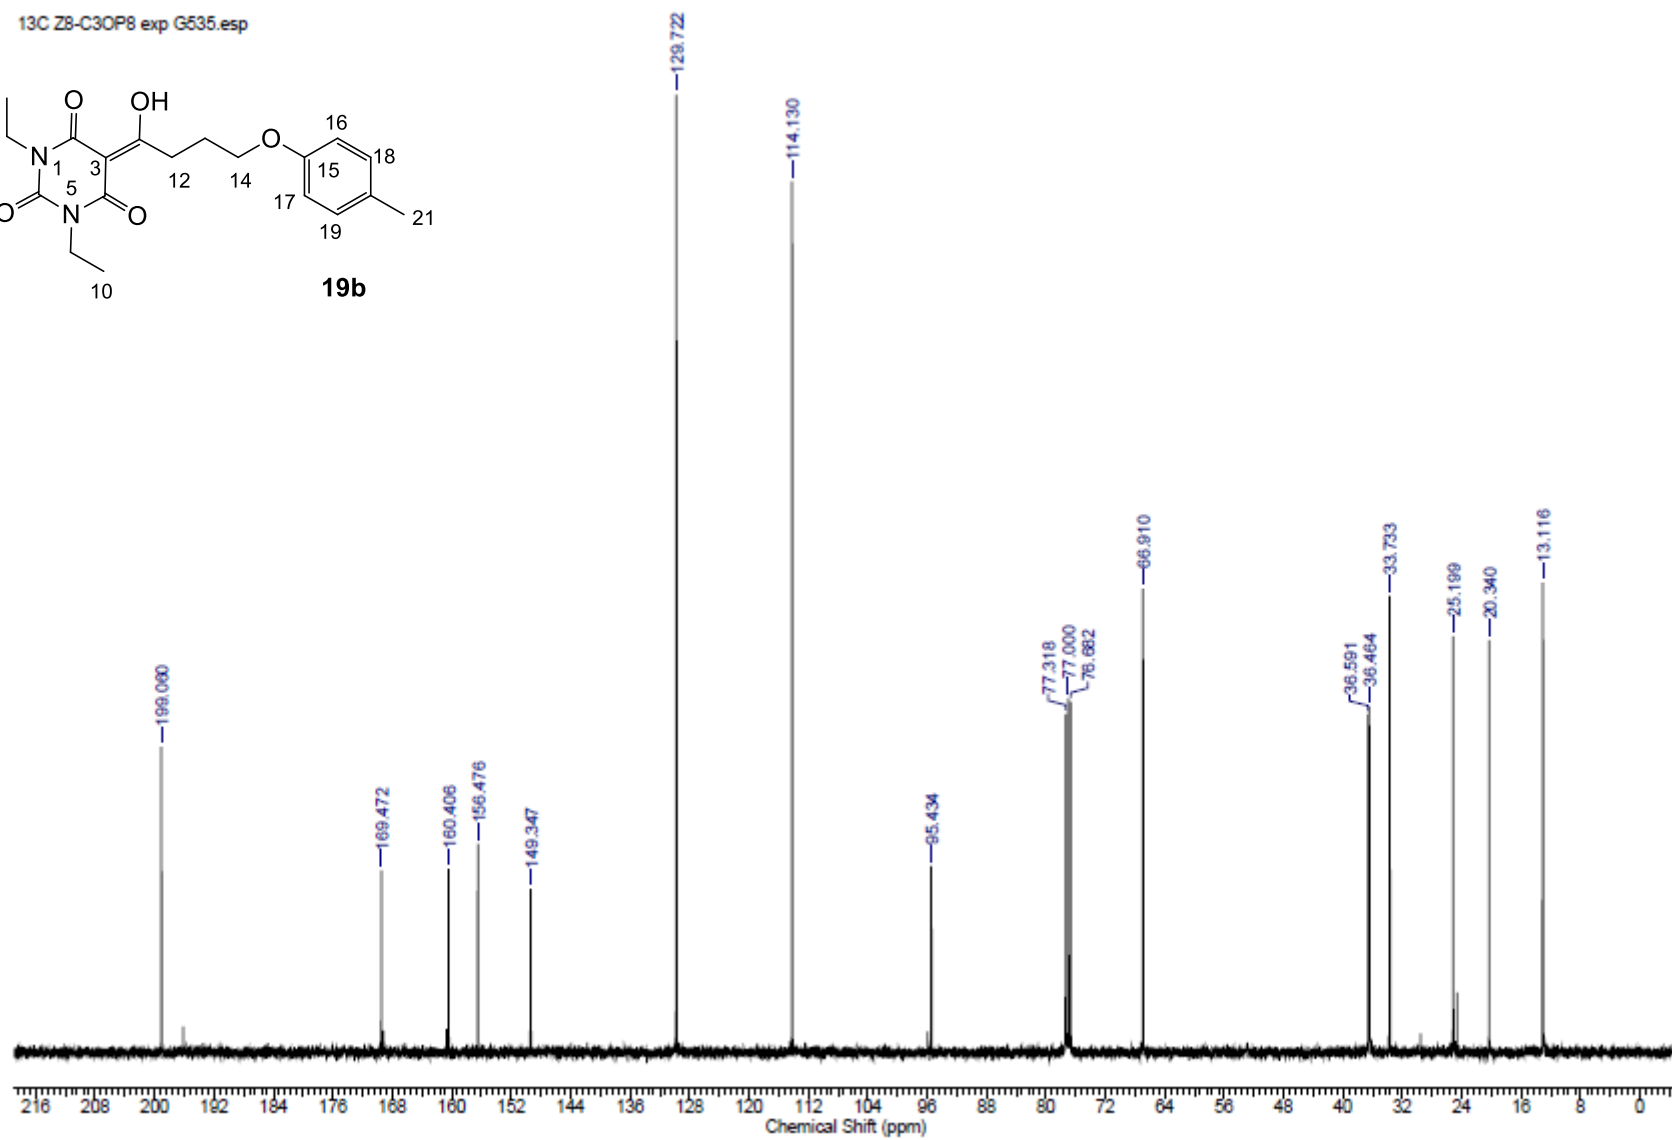



1H Z3-C3P2 exp G466.eso

VerticalScaleFactor = 1

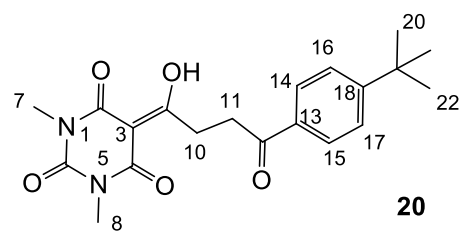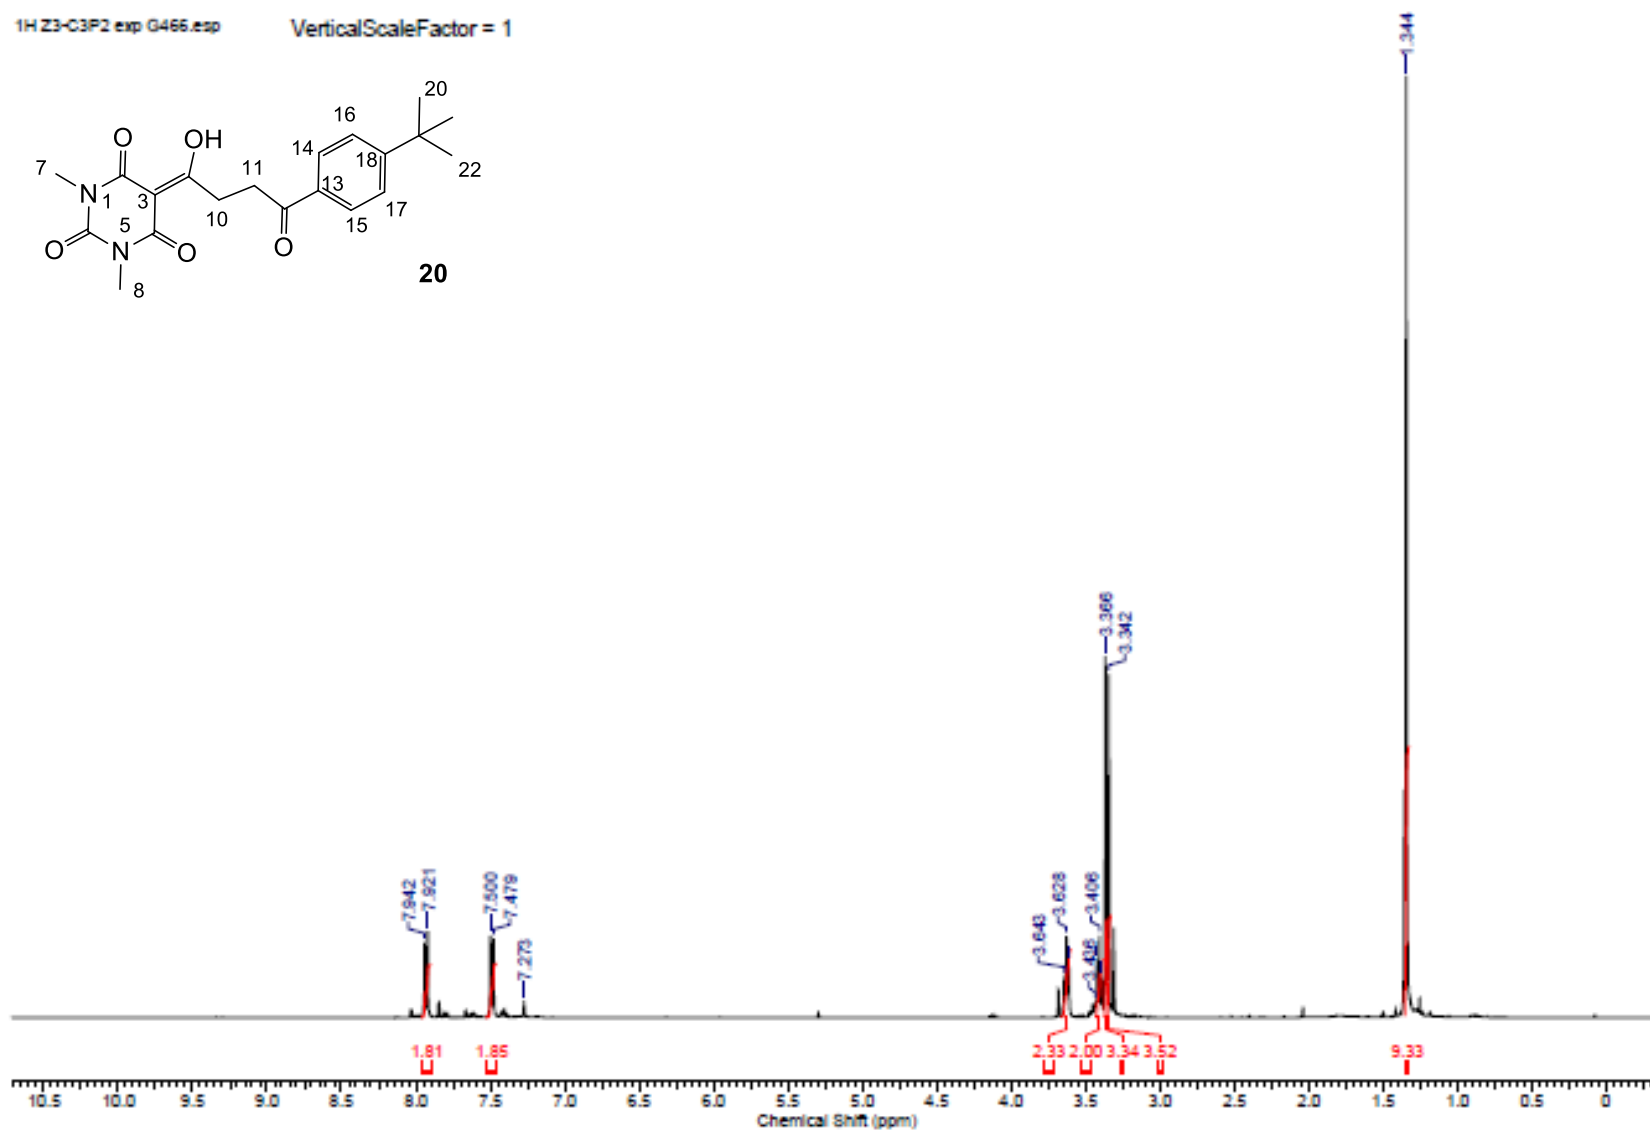

13C Z3-C3P2 exp G466.esp

VerticalScaleFactor = 1

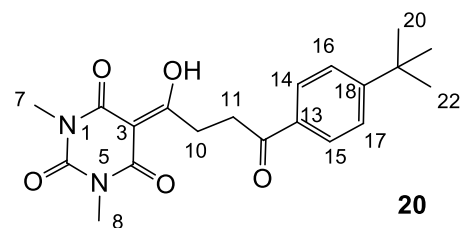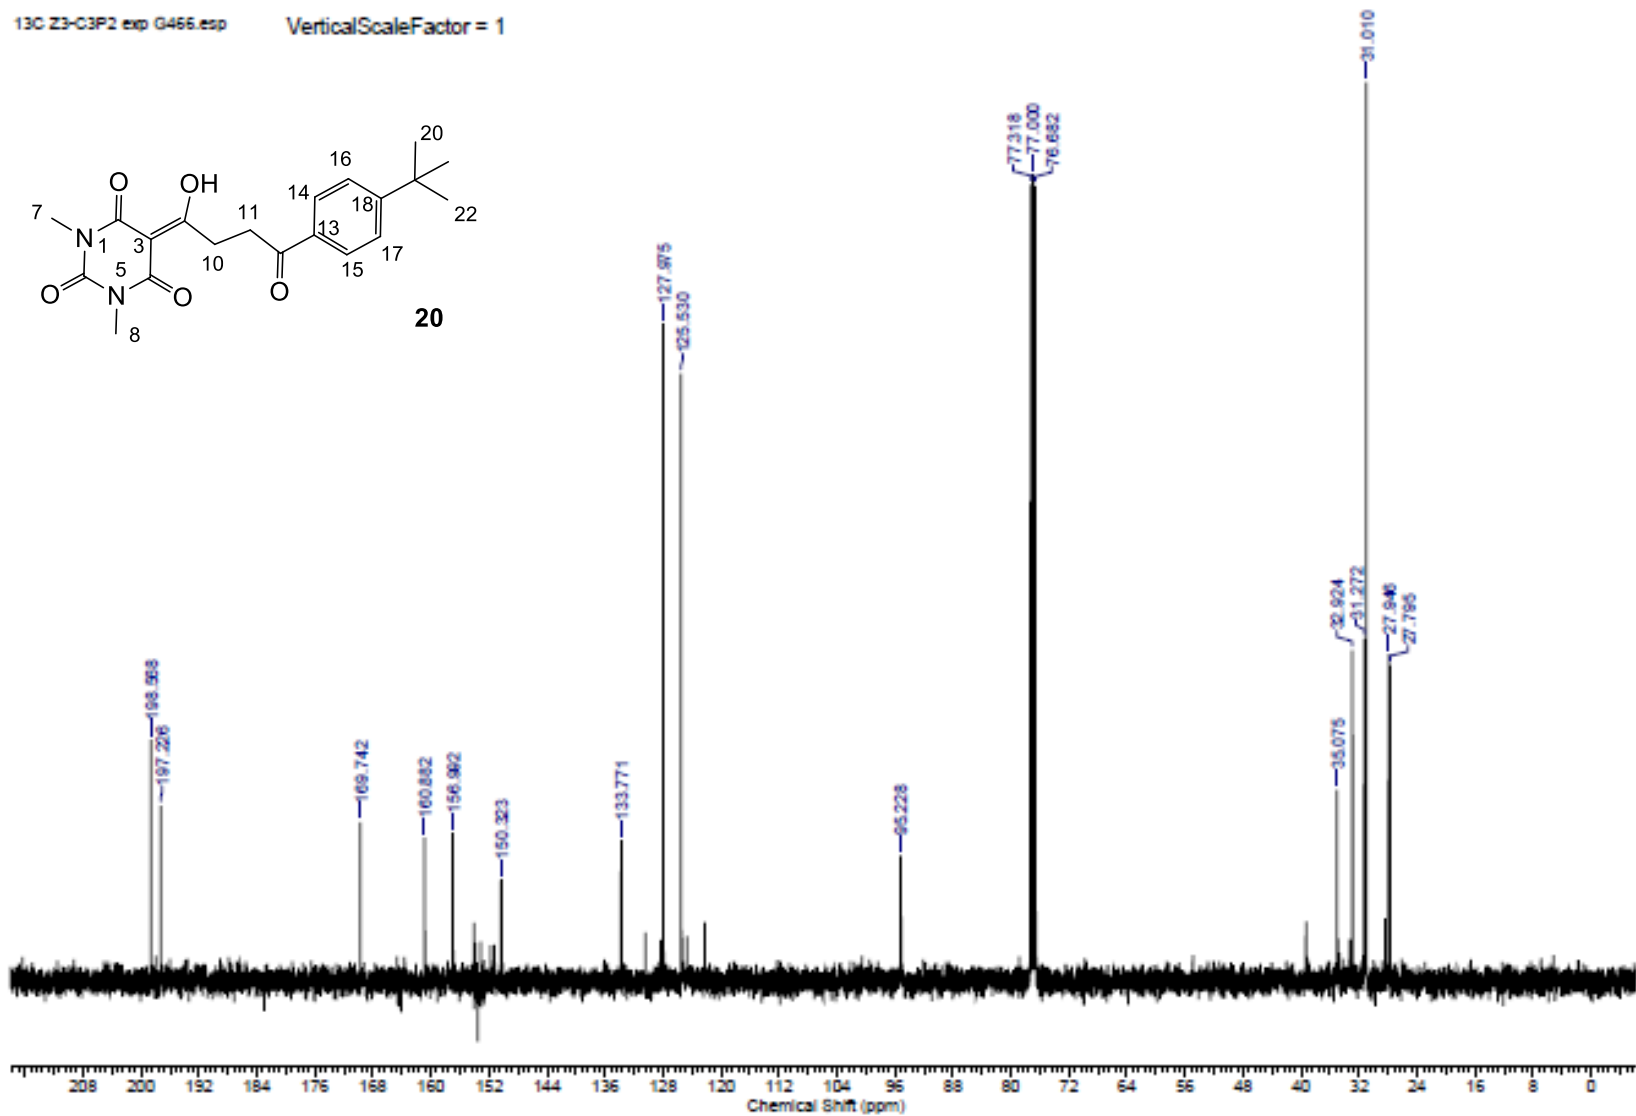

1H Z3-PO exp G468.esp

VerticalScaleFactor = 1

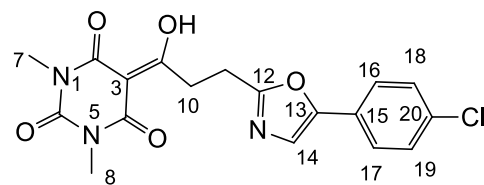

21

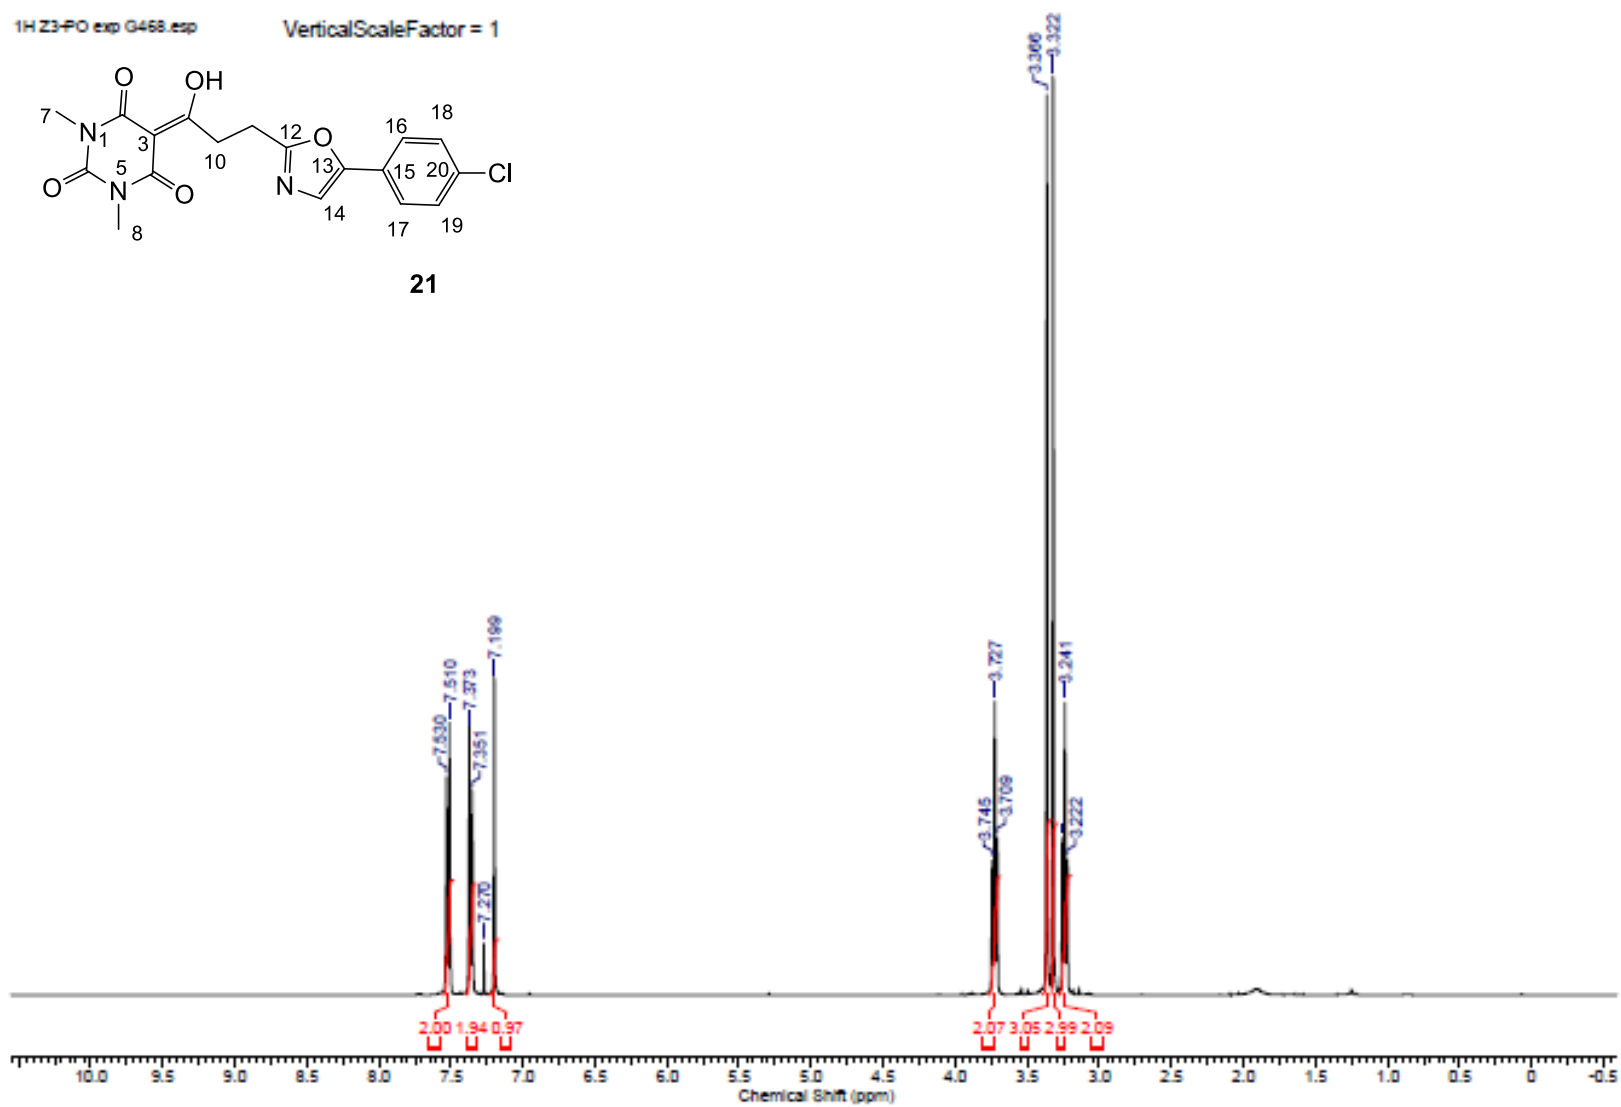

13C Z3-PO exp G468.exp

VerticalScaleFactor = 1

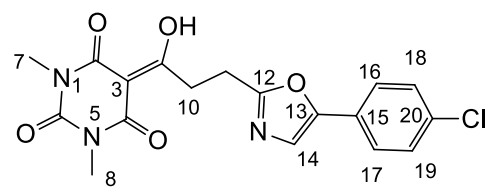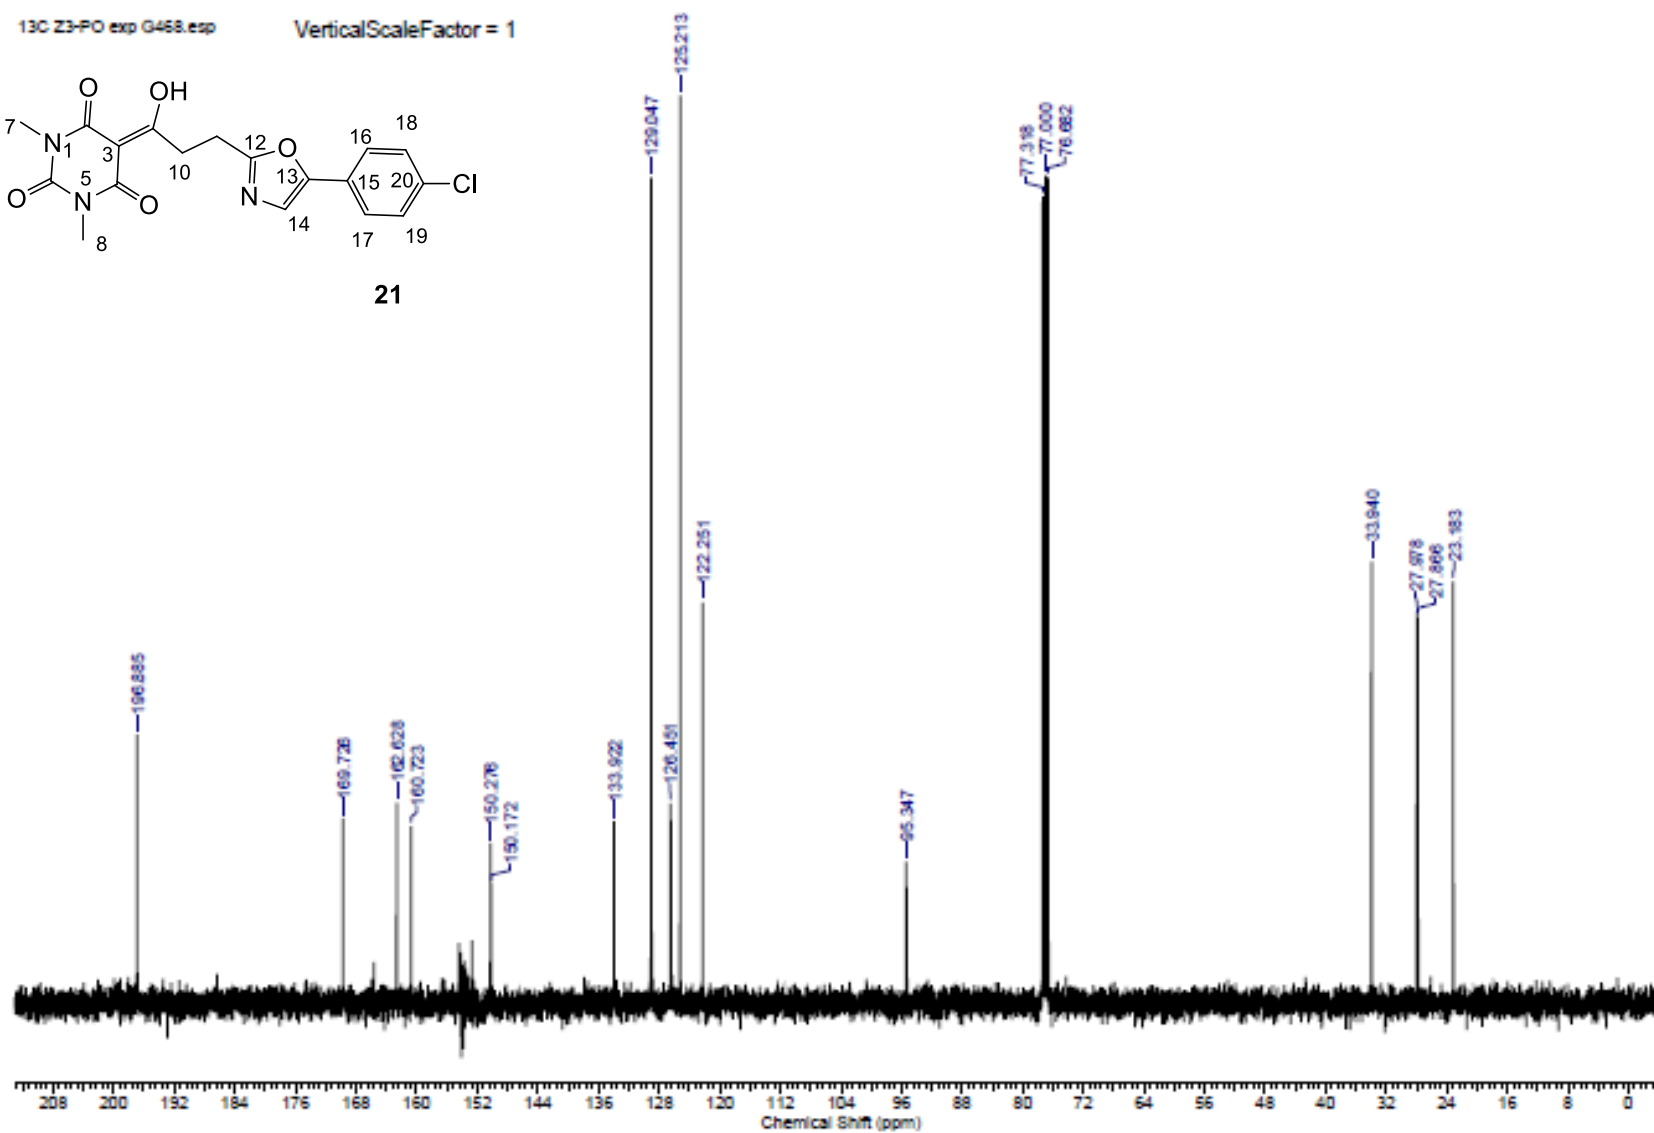

1H ZTA3-C3P exp G419.esp

VerticalScaleFactor = 1

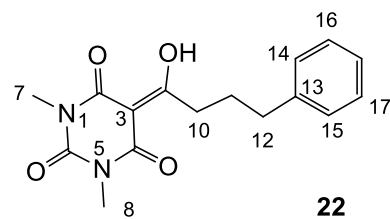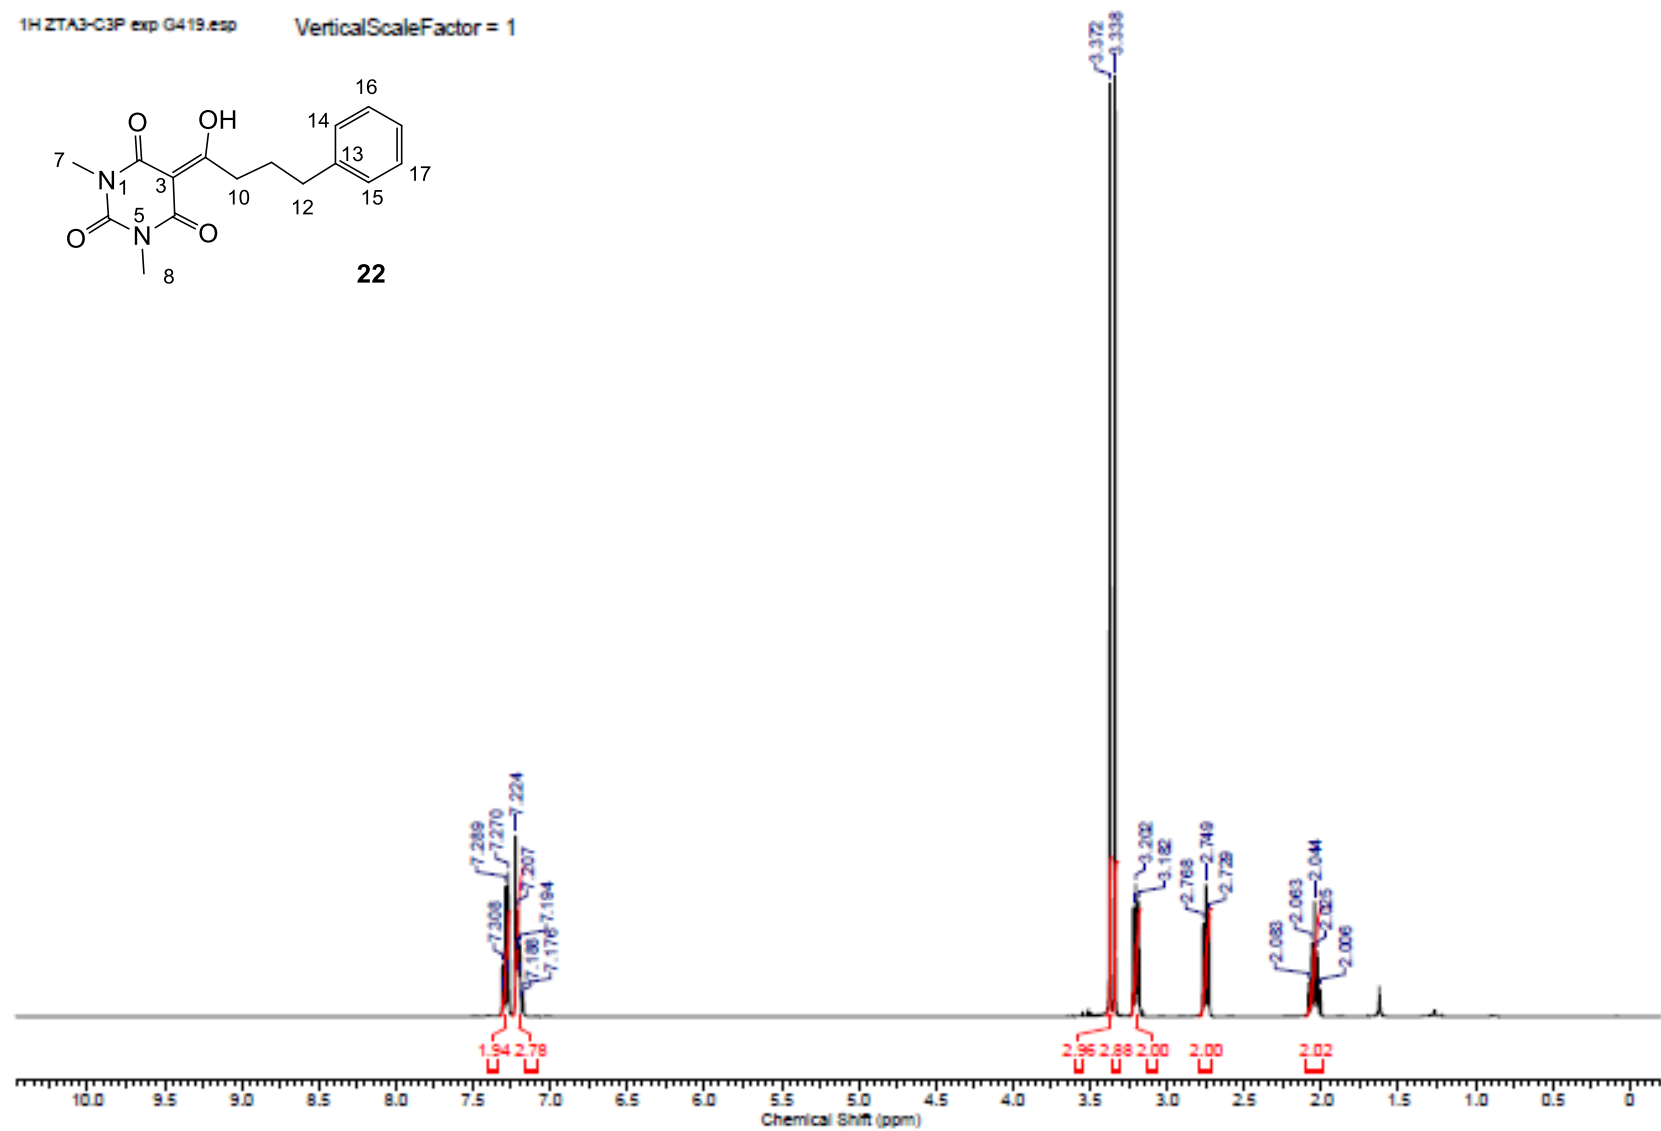

13C ZTA3-C3P exp G419.esp

VerticalScaleFactor = 1

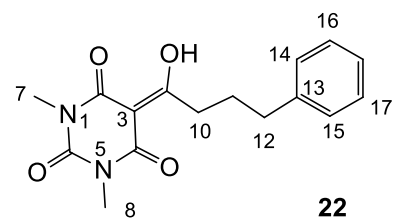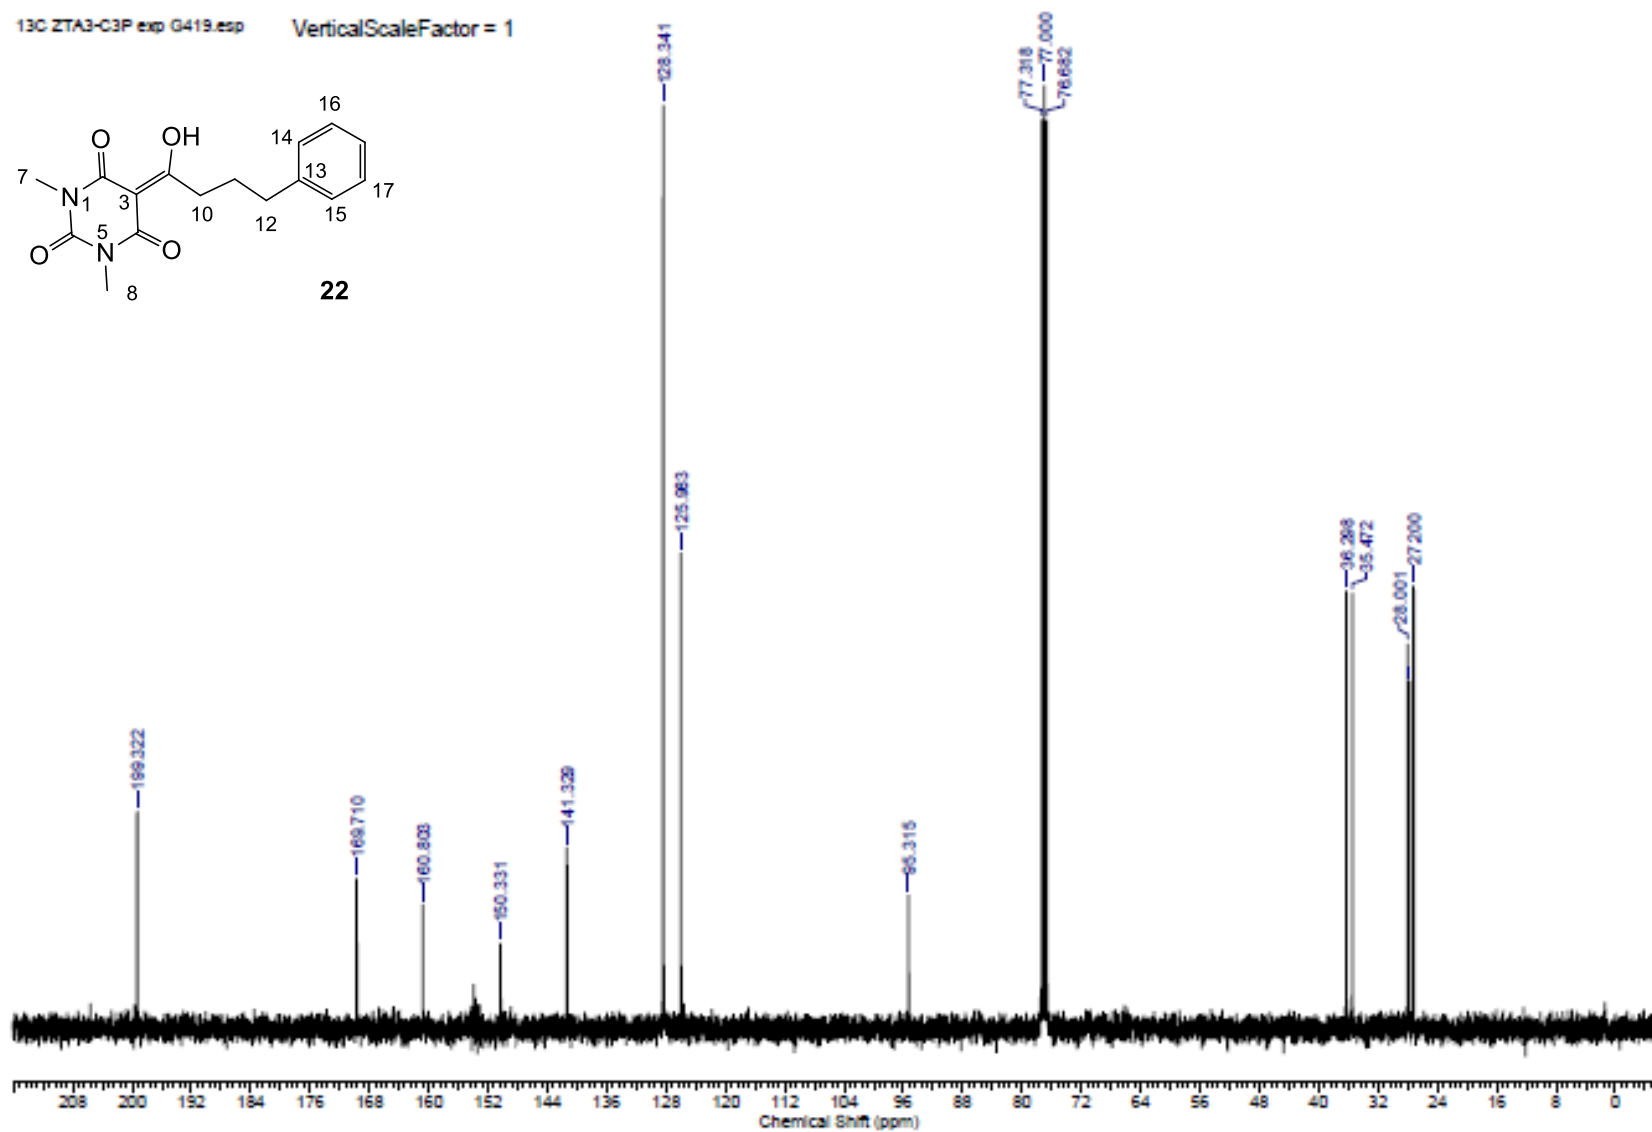

1H Z3-C11N exp G429.esp

VerticalScaleFactor = 1

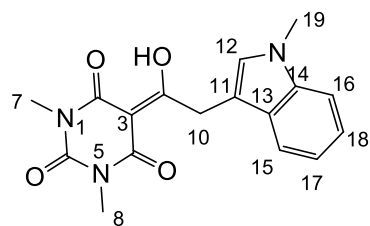

**23a**

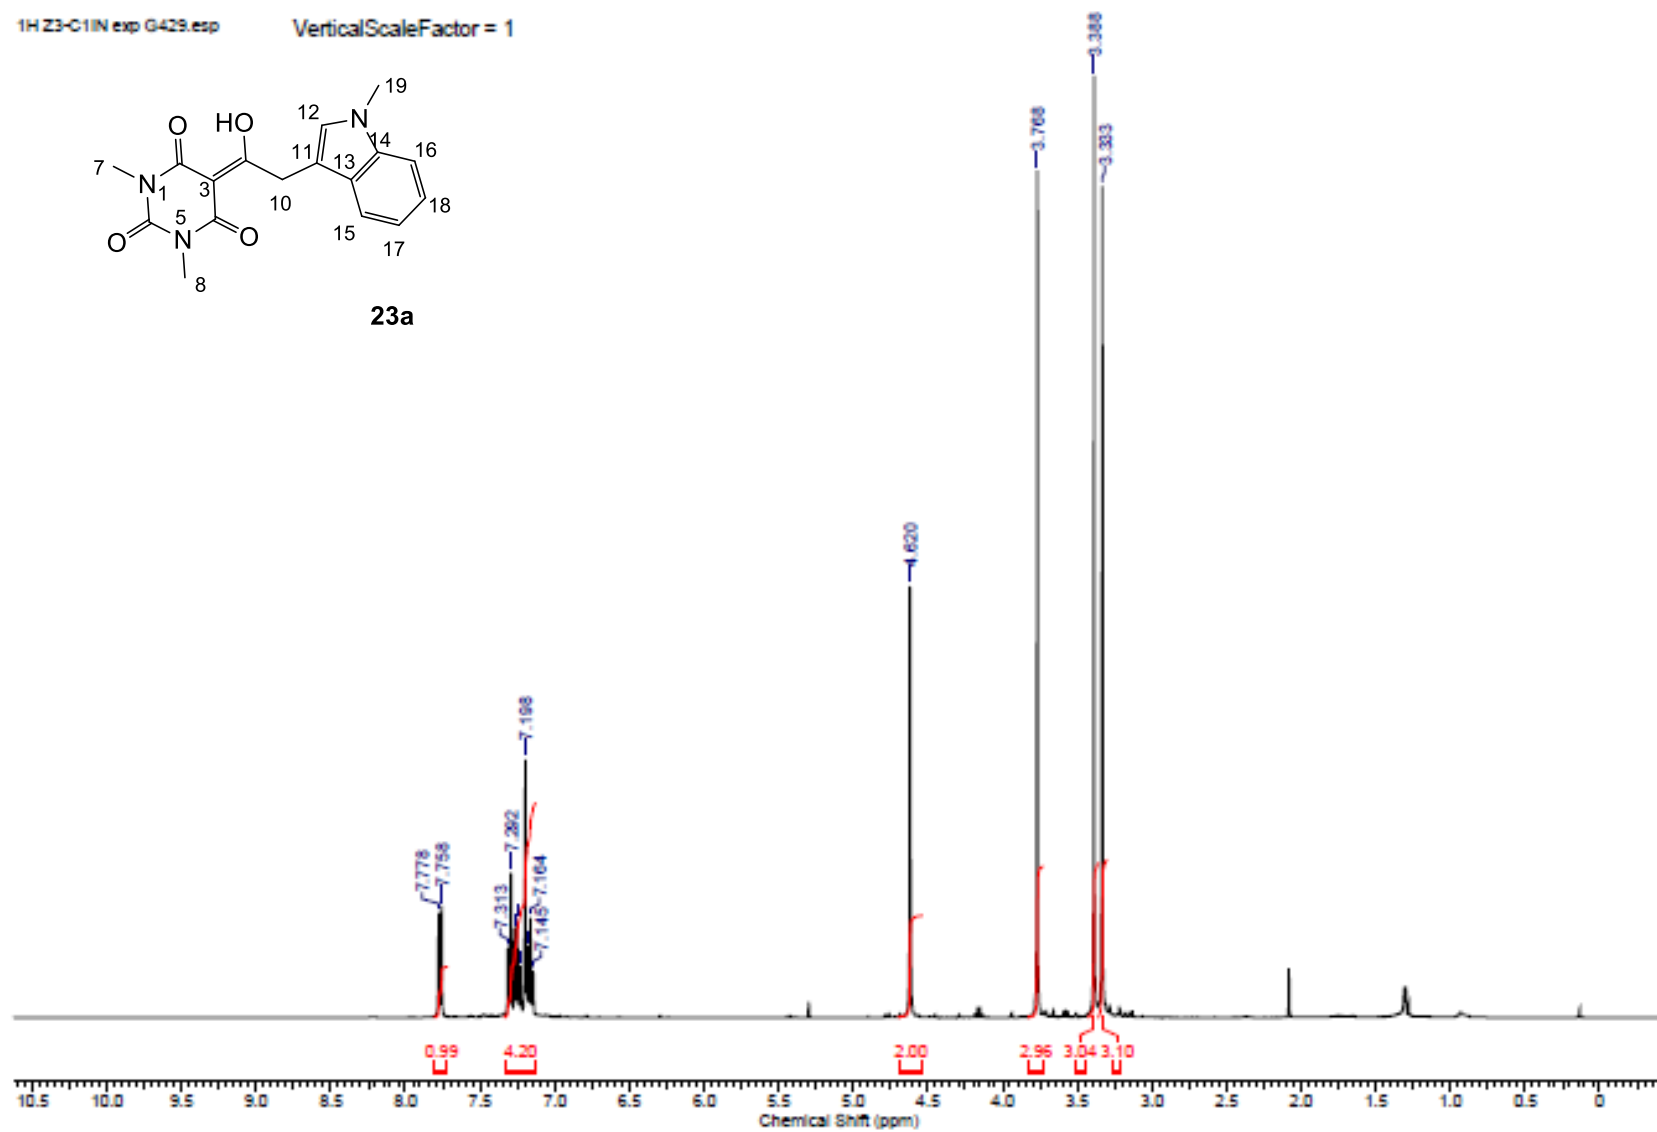

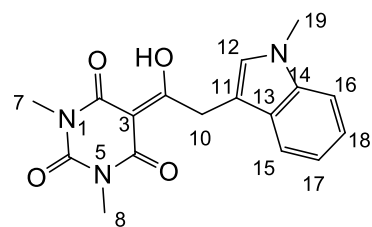**23a**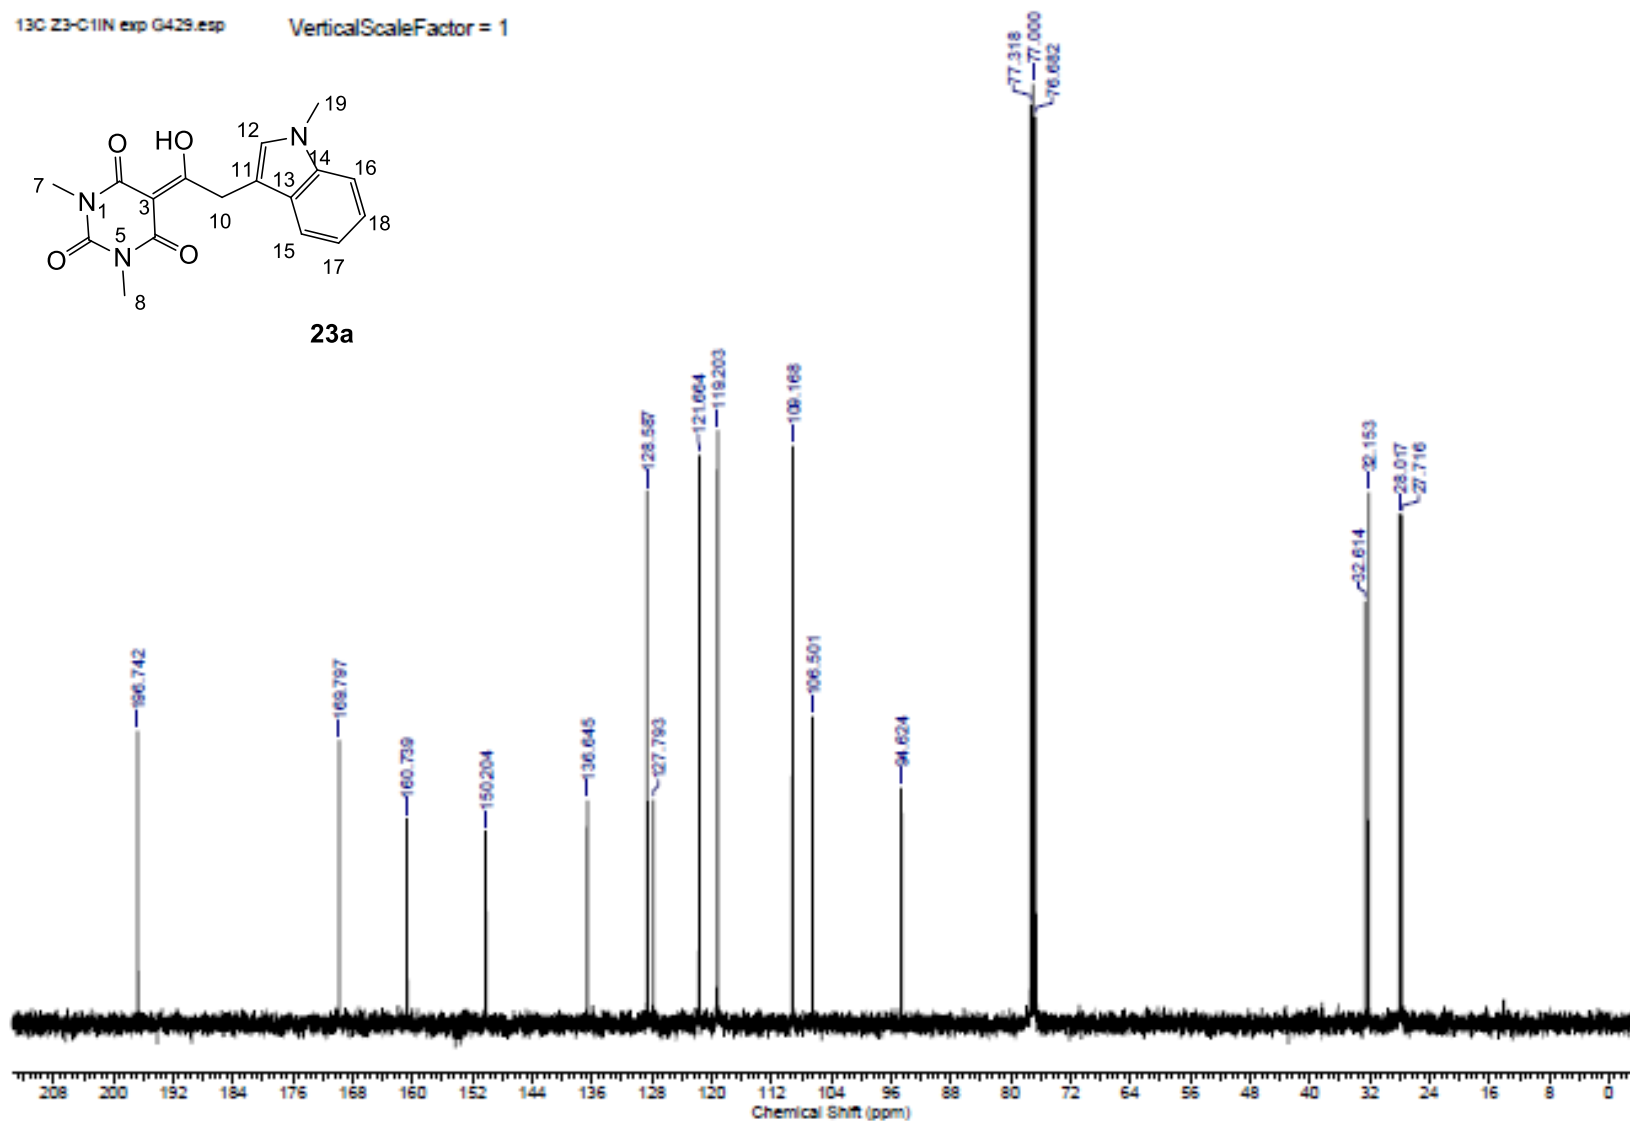



1H Z3-C31N exp G465.esp

VerticalScaleFactor = 1

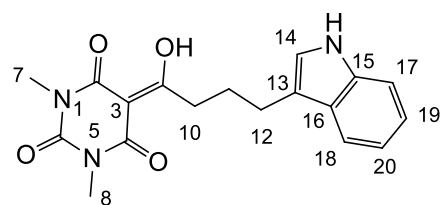

23b

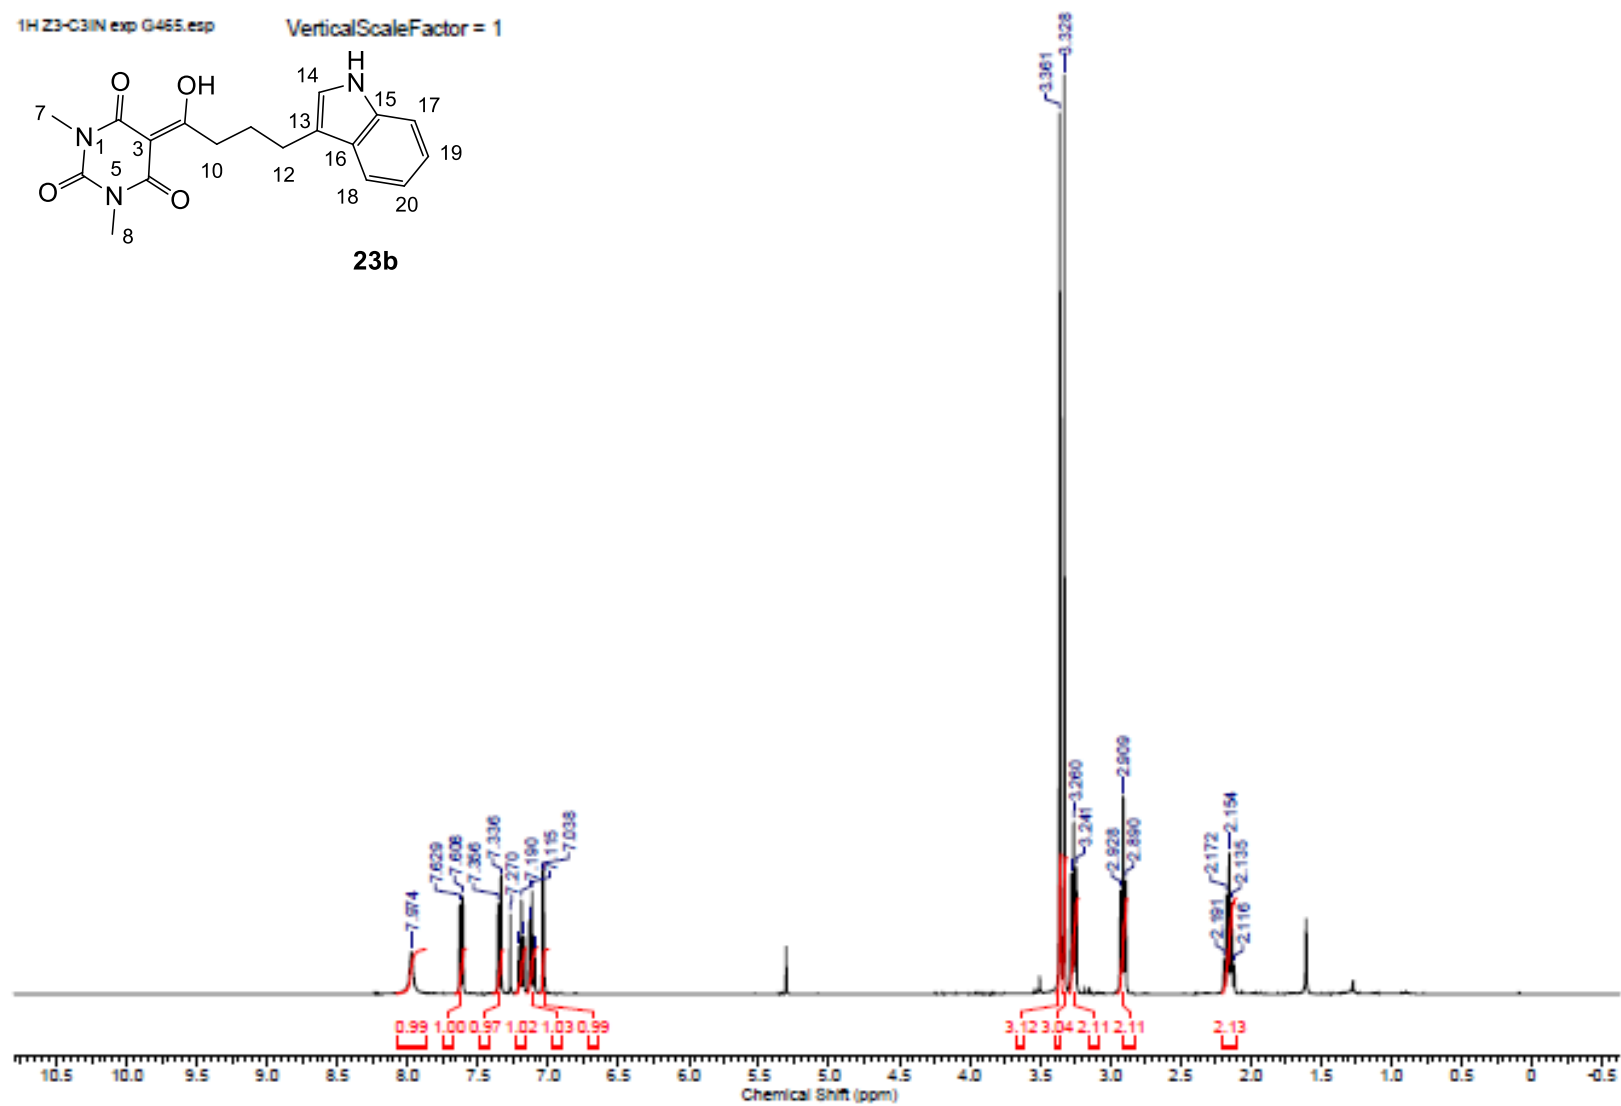

13C Z3-C3IN exp G465.exp

VerticalScaleFactor = 1

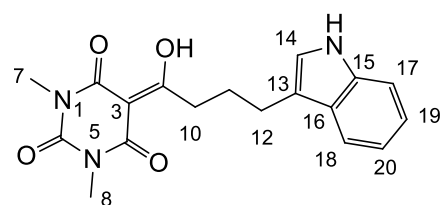

**23b**

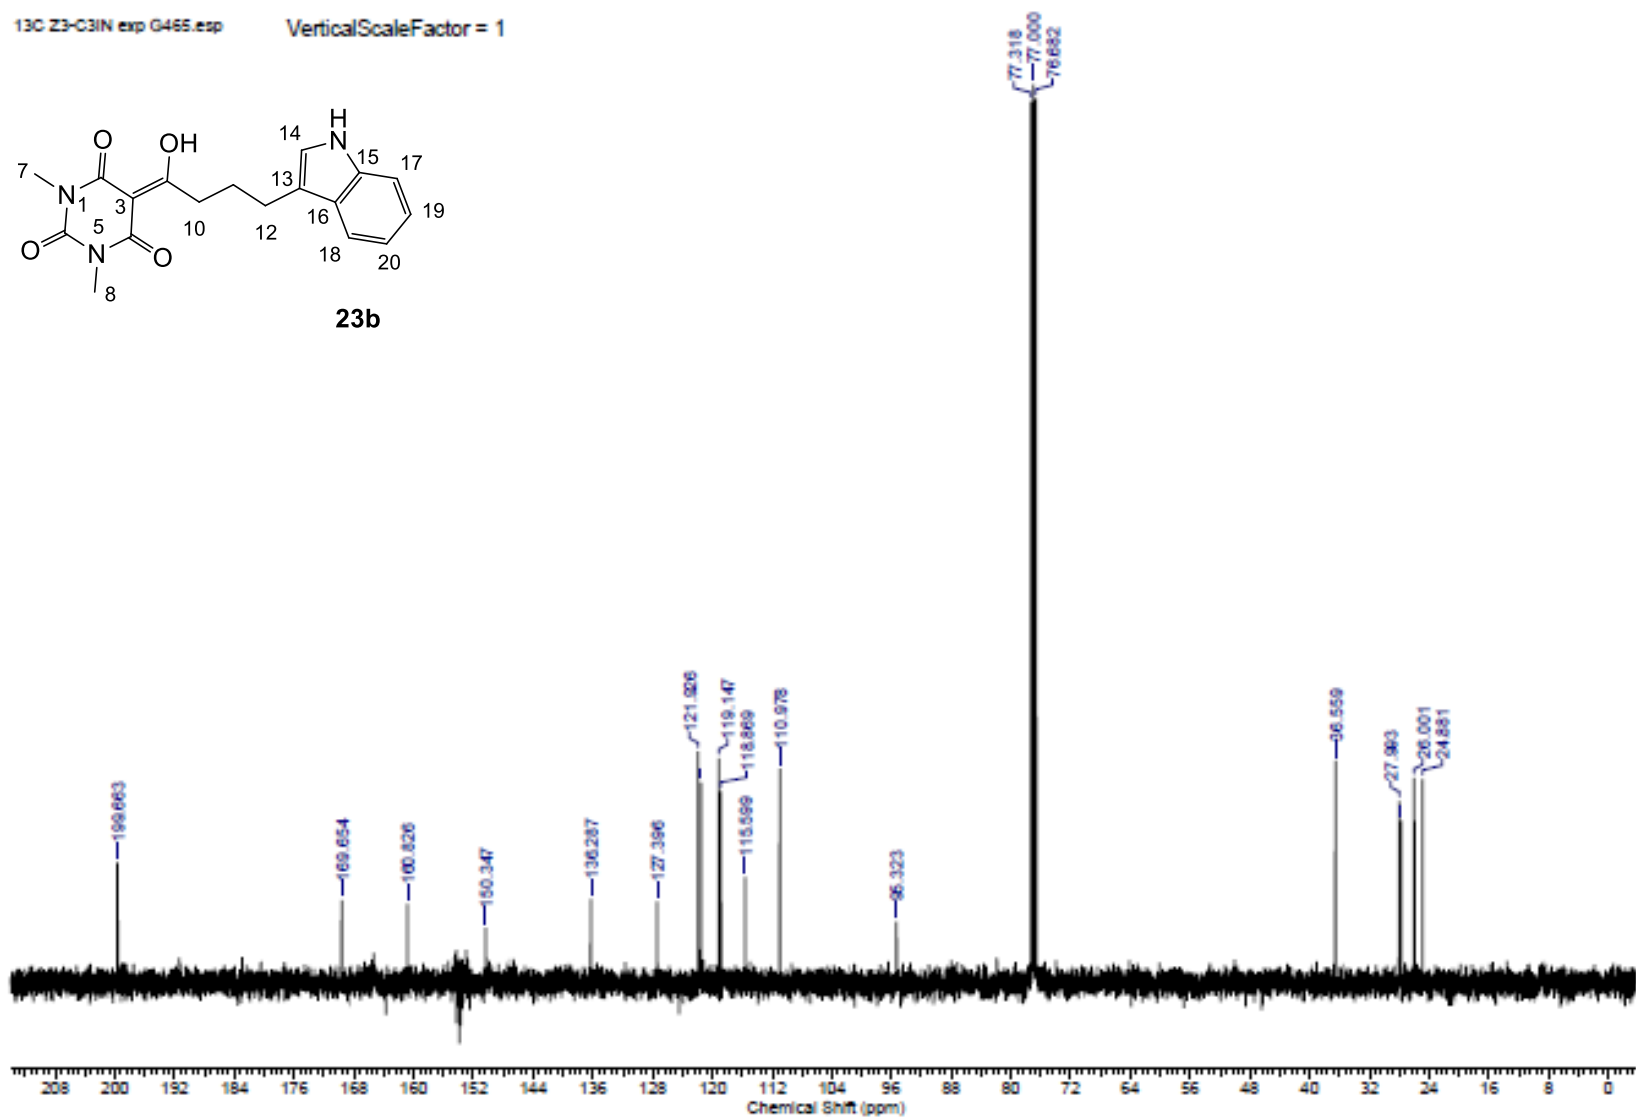

1H Z3-C10P1 exp G452.exp

VerticalScaleFactor = 1

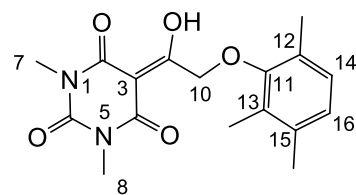

24

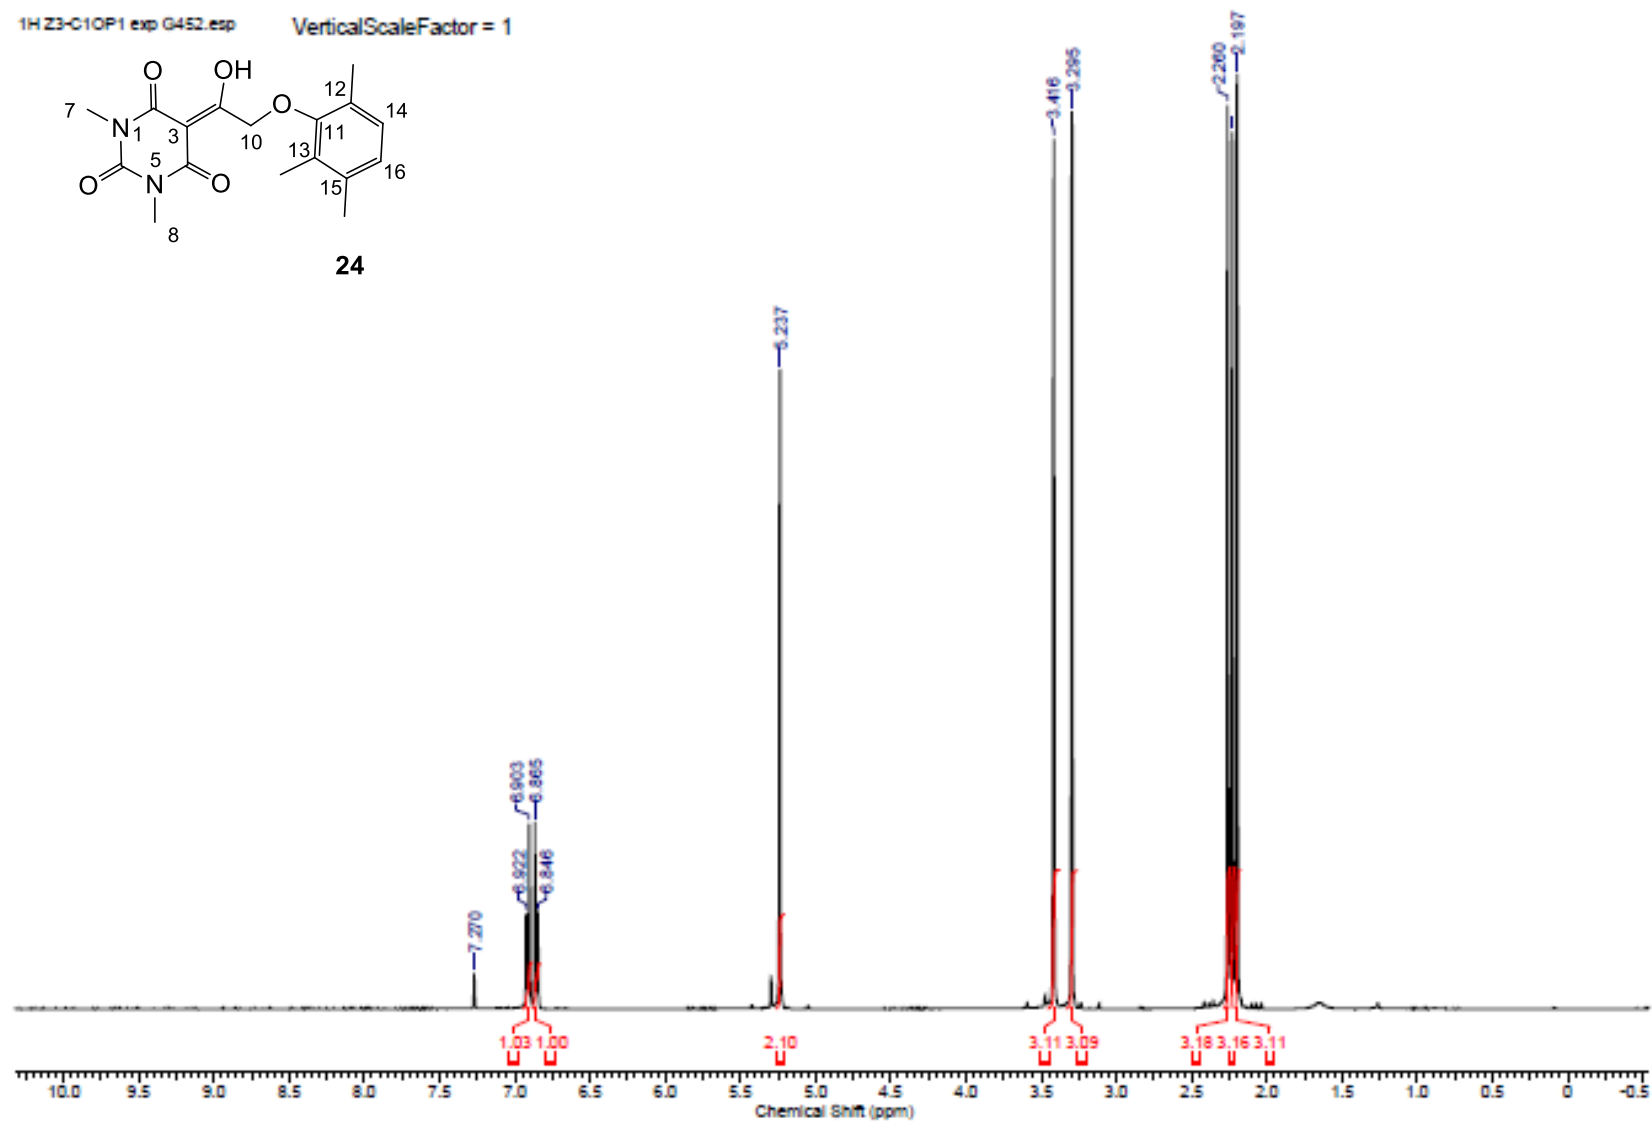

13C Z3-C10P1 exp G452.exp

VerticalScaleFactor = 1

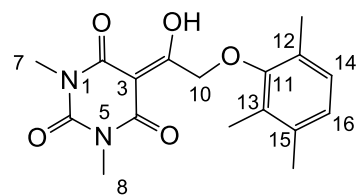

**24**

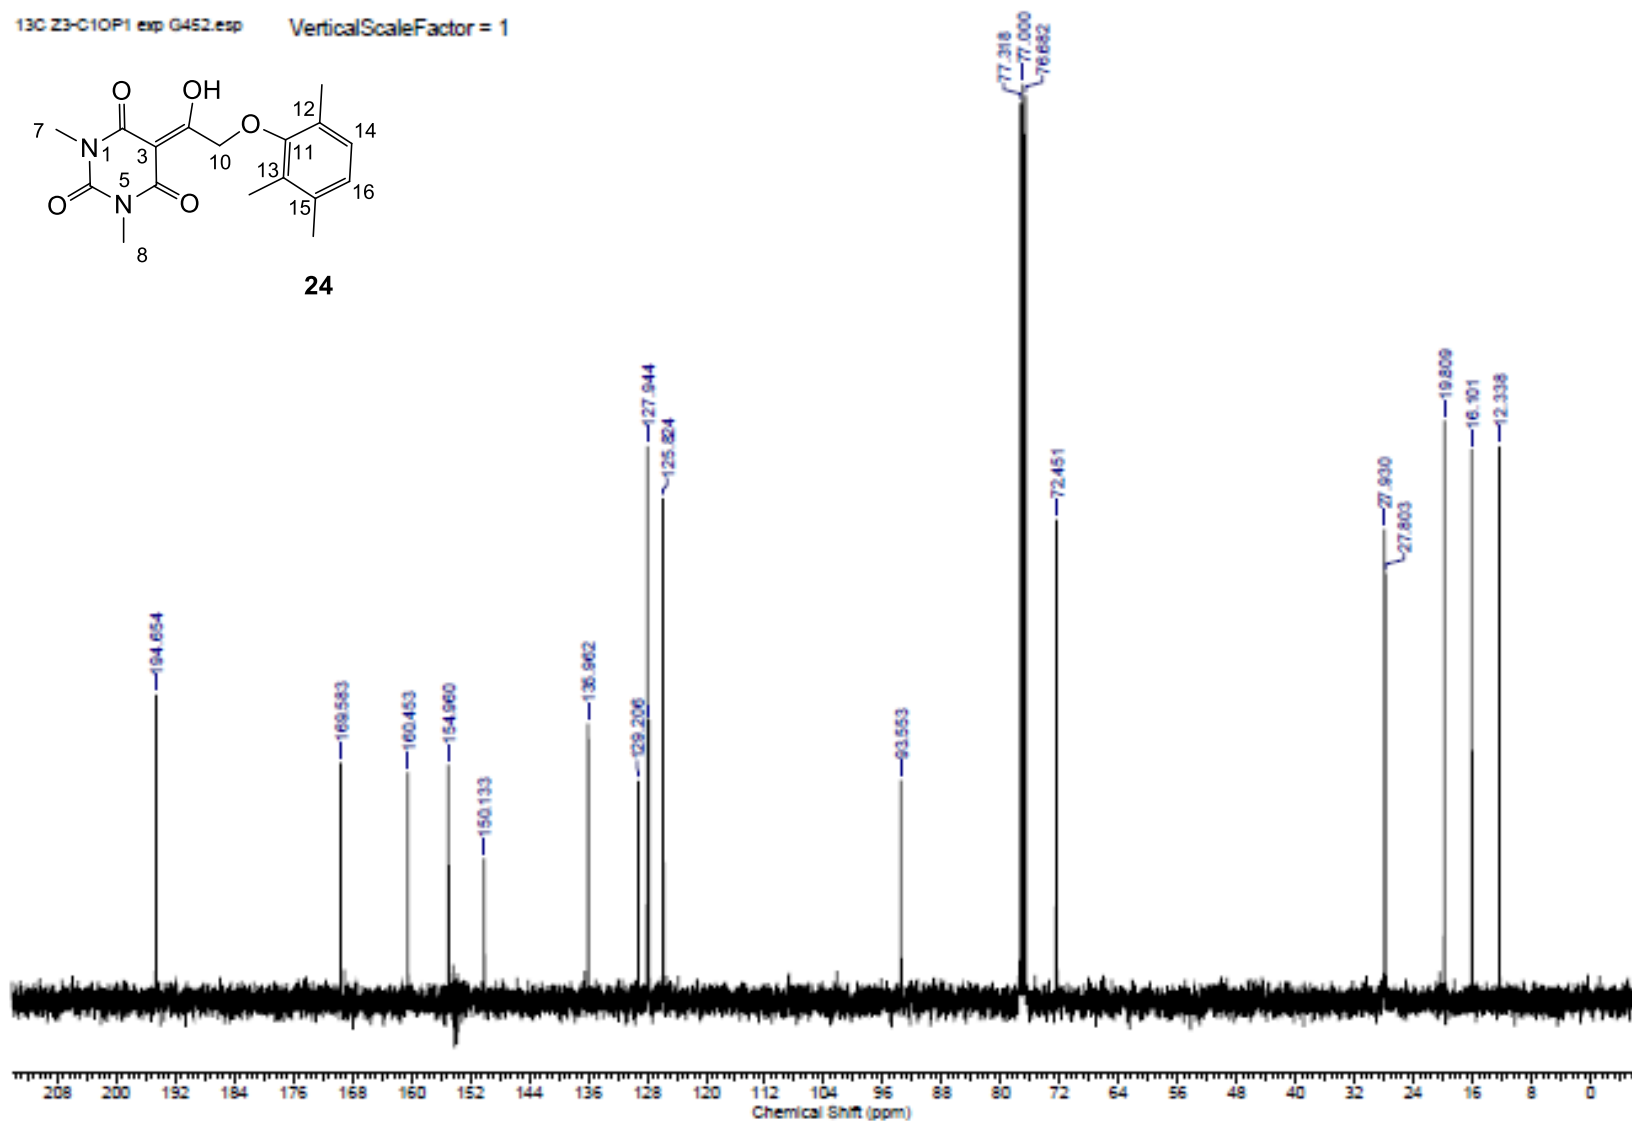

1H Z7-C1 exp G484 500-2.esp VerticalScaleFactor = 1

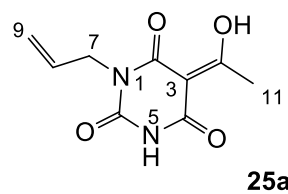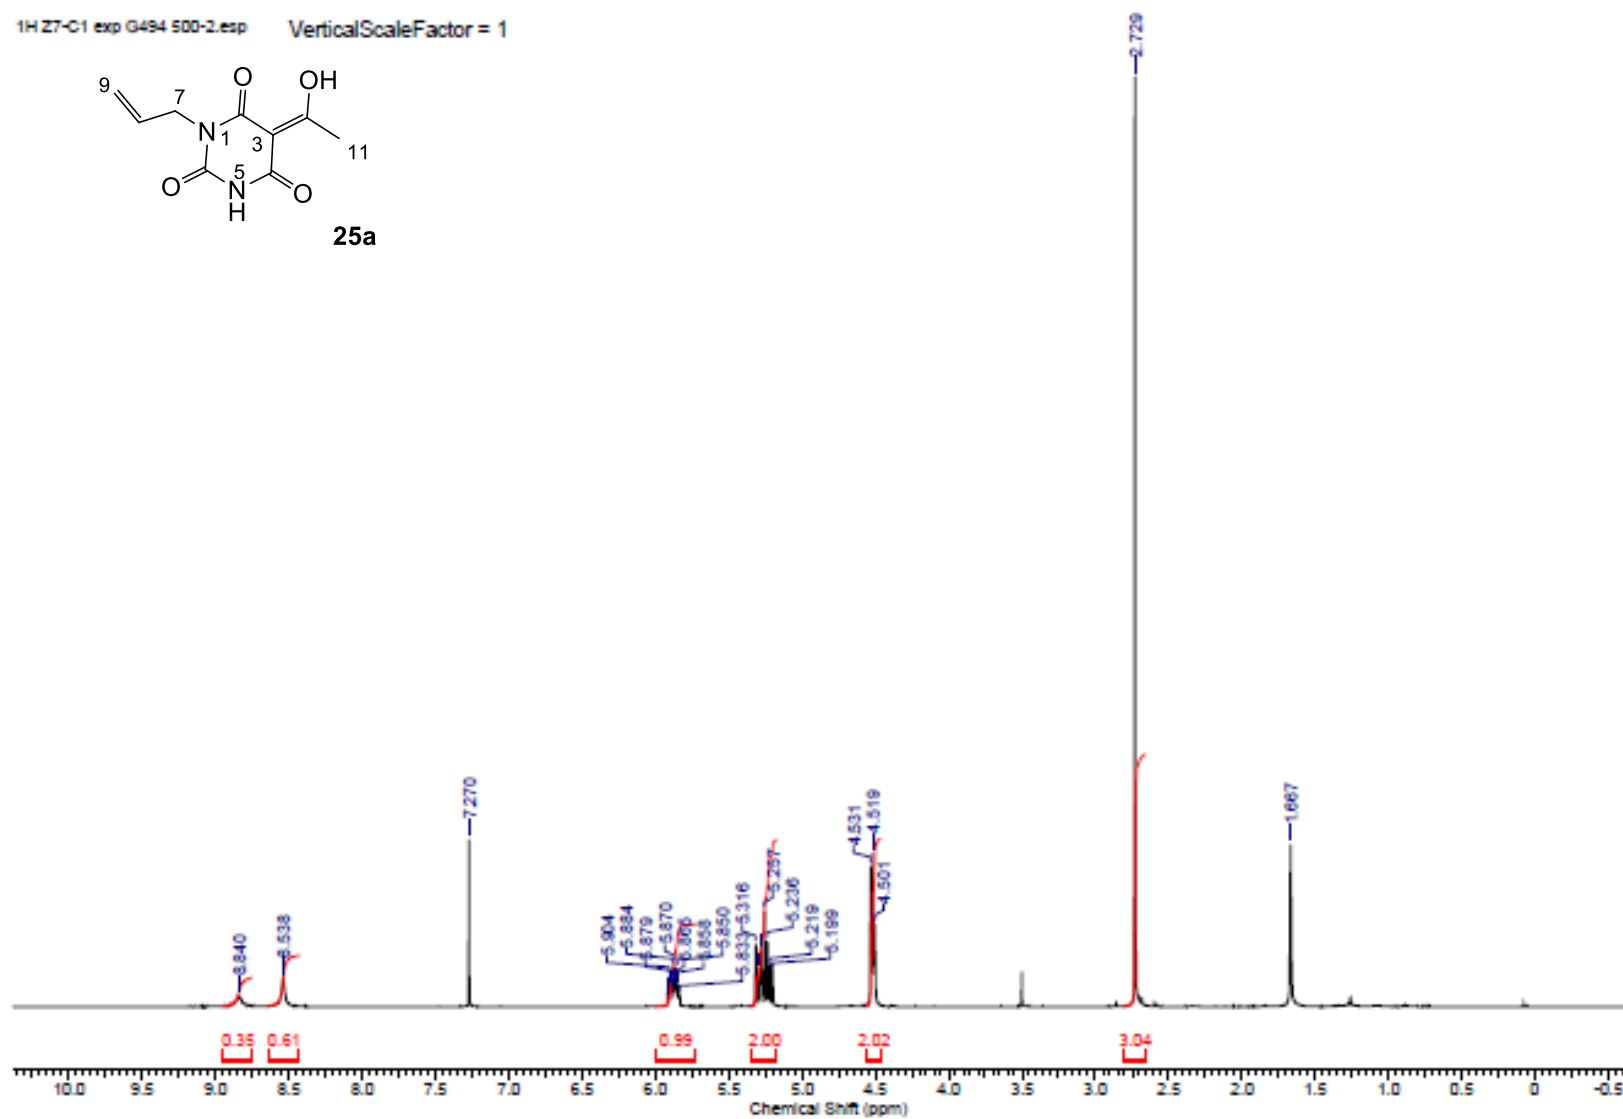

<sup>13</sup>C Z7-C1 exp G494 500-2.esp VerticalScaleFactor = 1

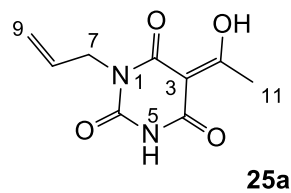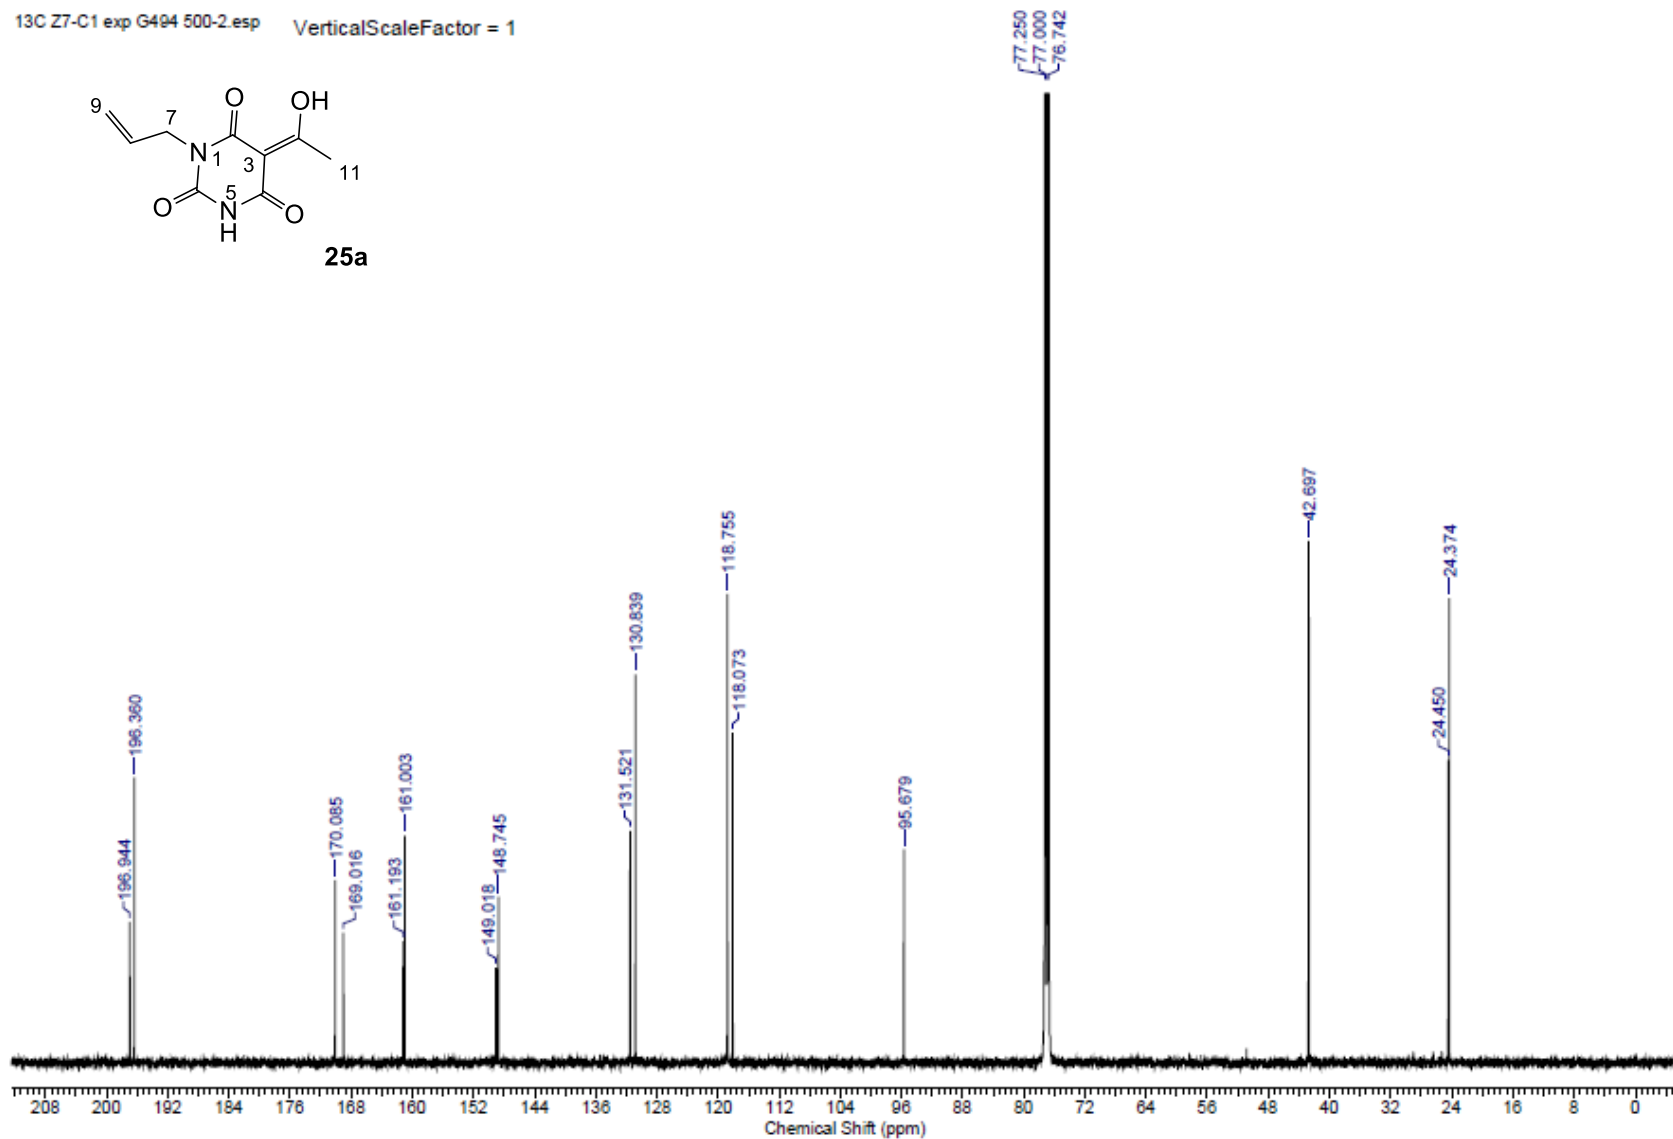

1H Z7-TMH exp G482.esp

VerticalScaleFactor = 1

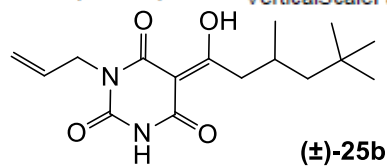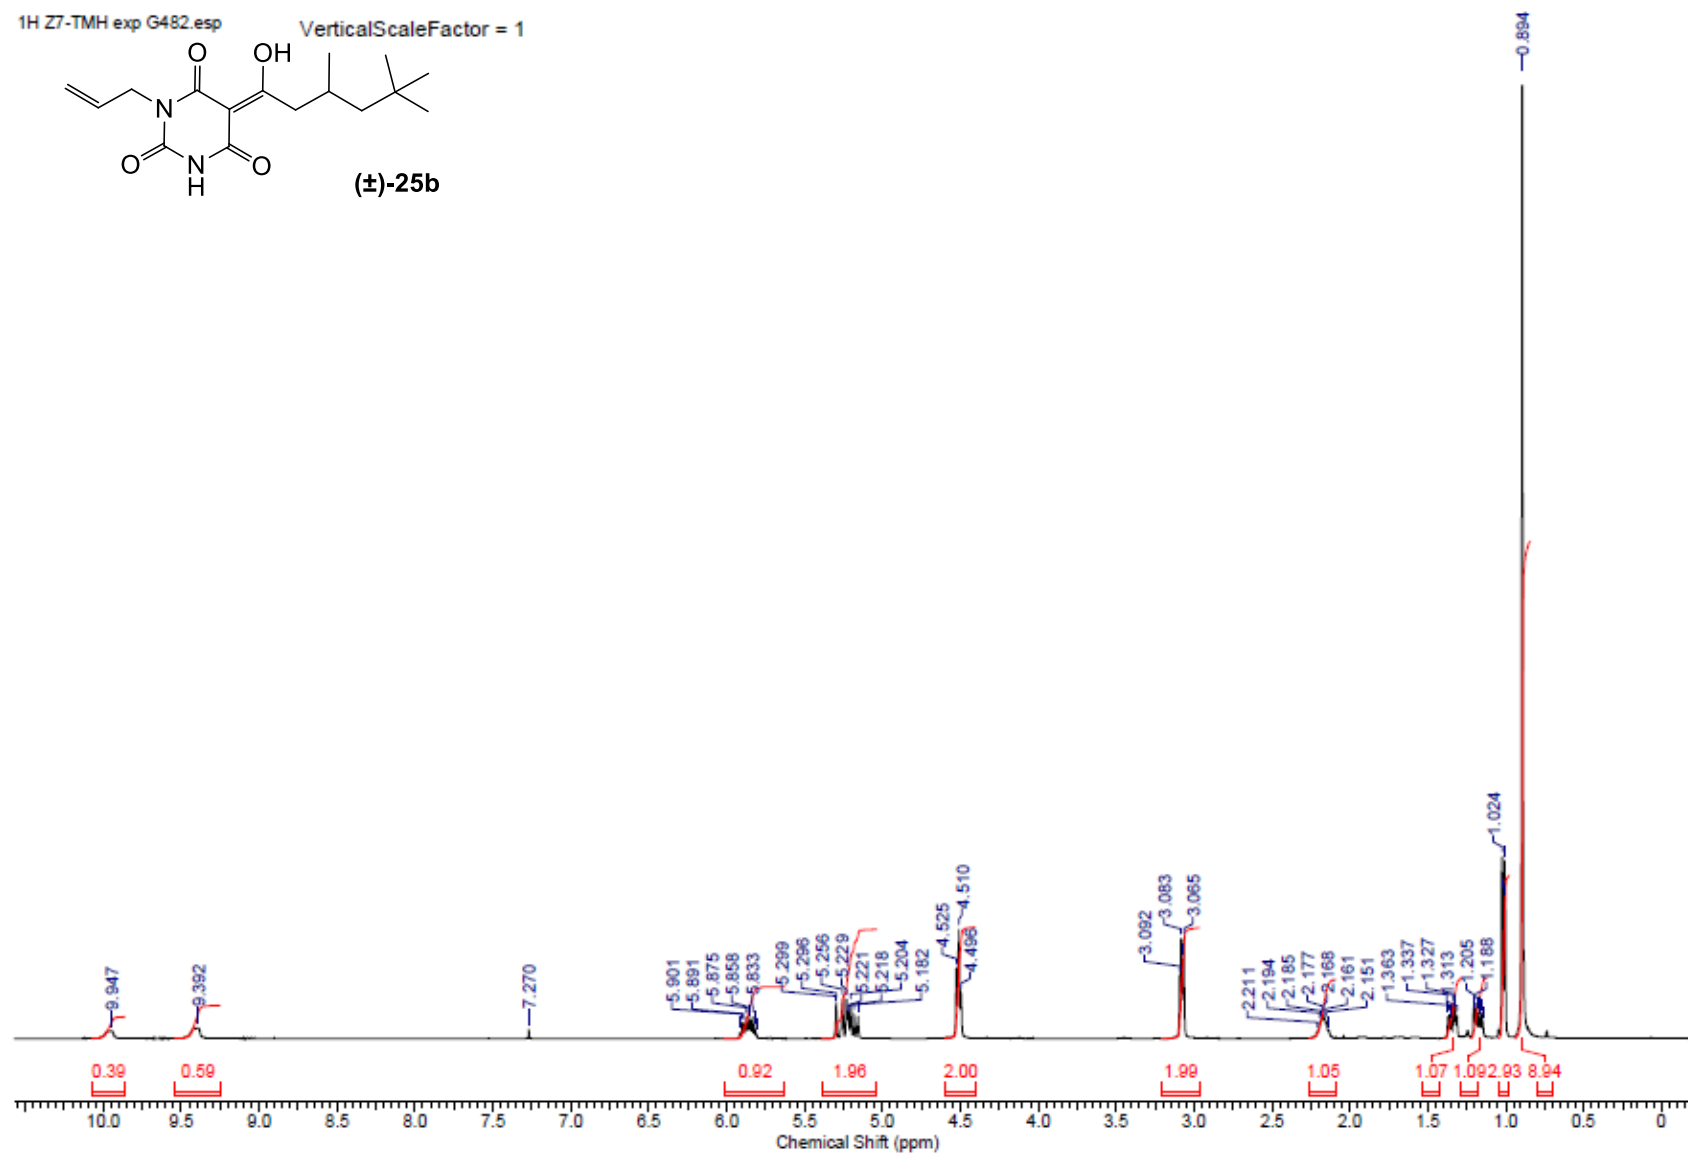

13C Z7-TMH exp G482.esp

VerticalScaleFactor = 1

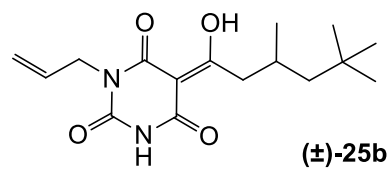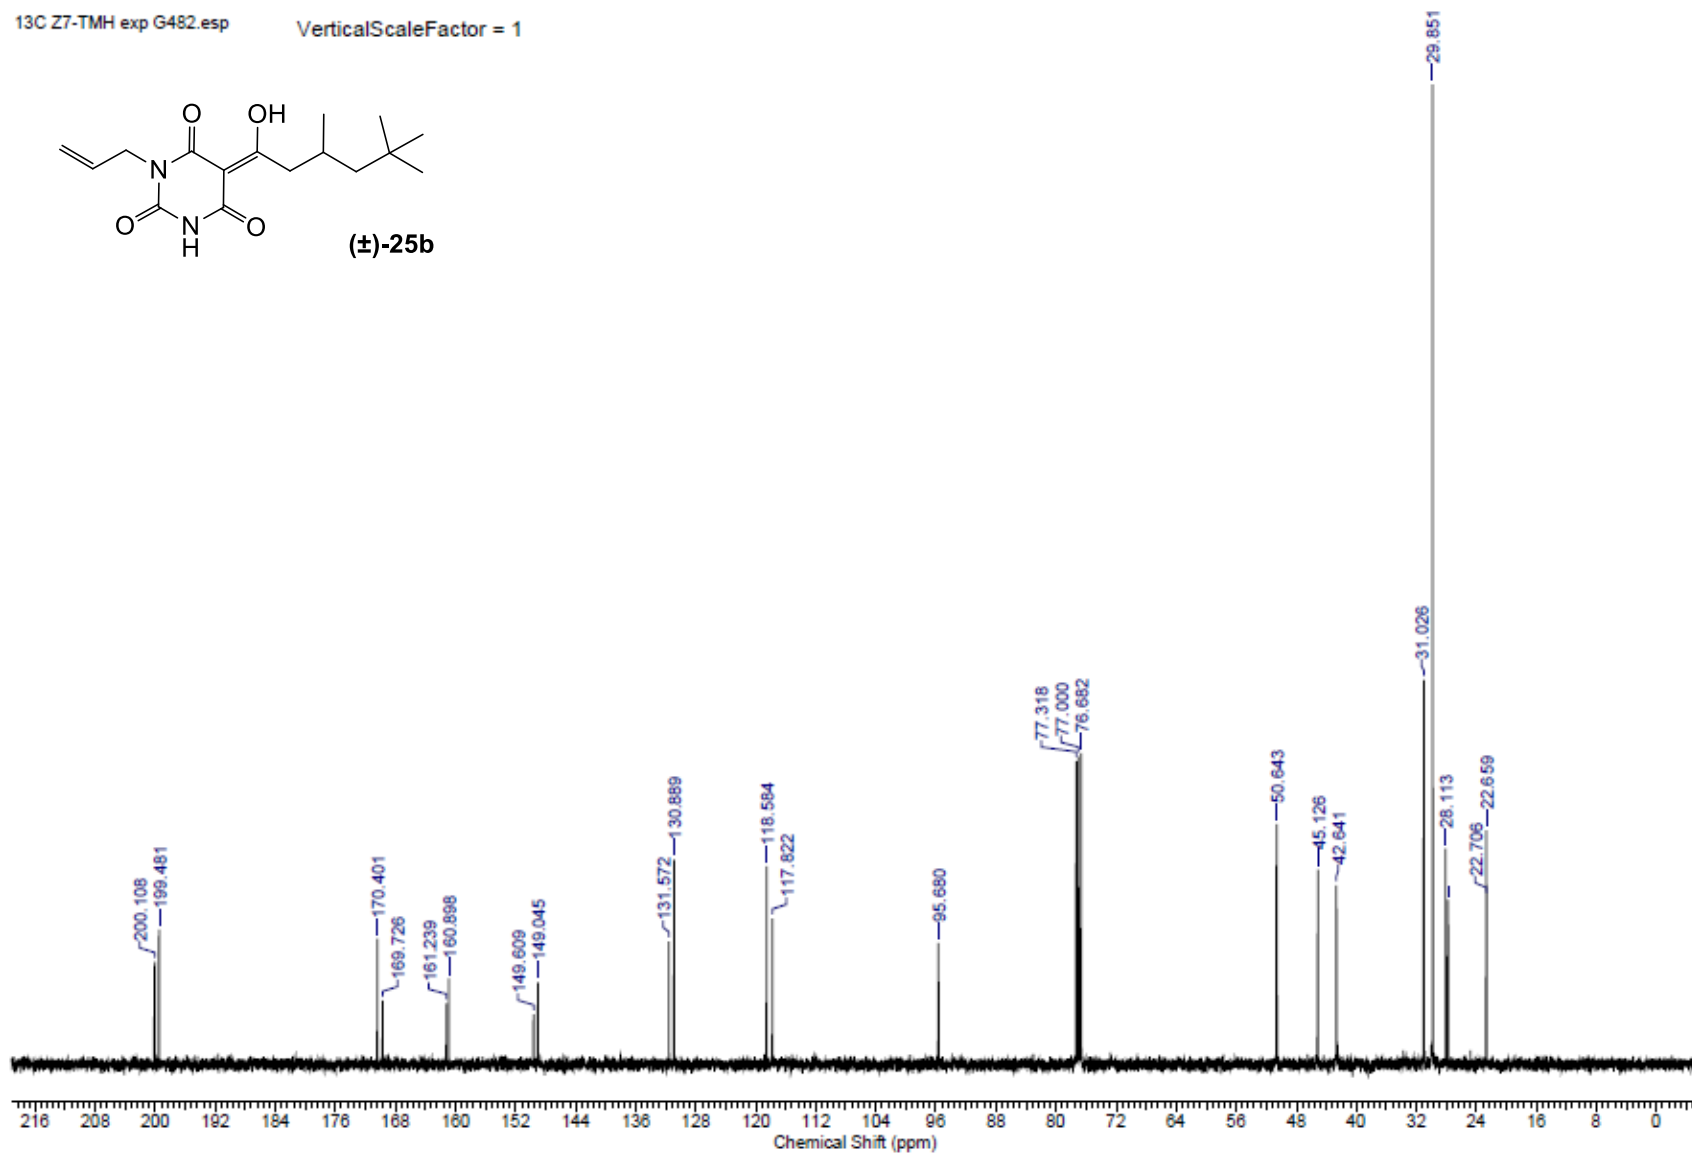



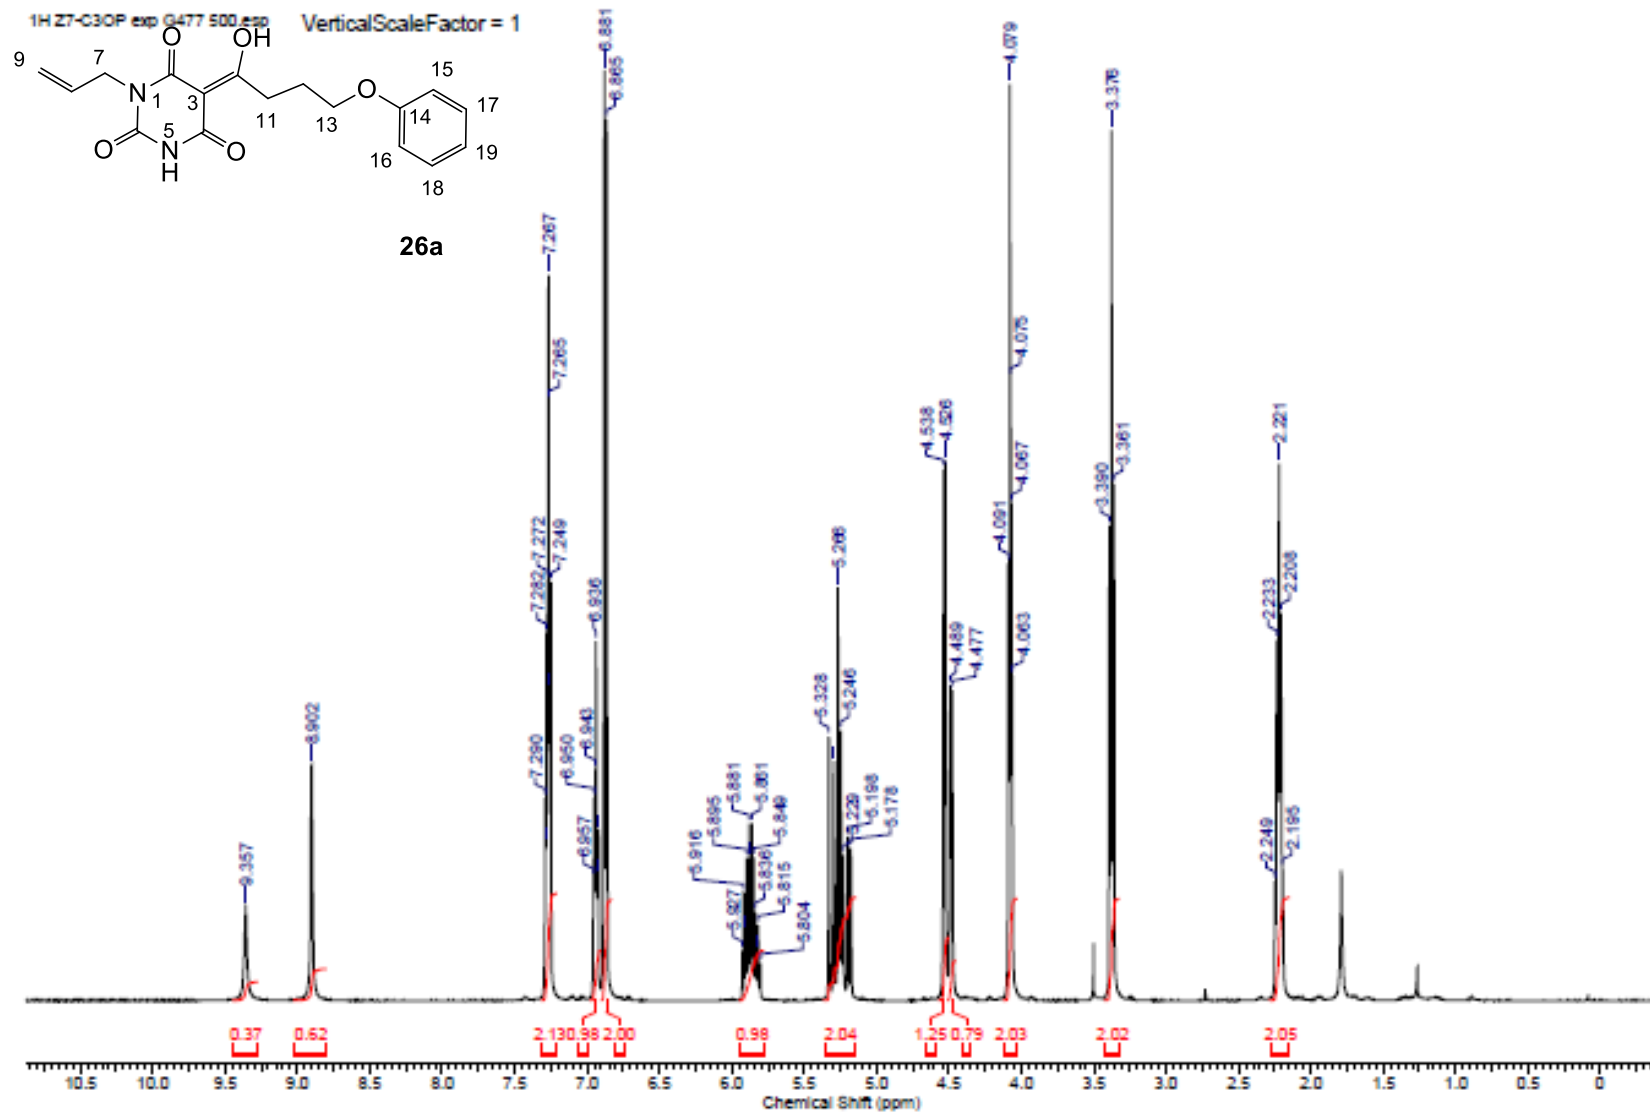

13C Z7-C3OP 500 again.esp

VerticalScaleFactor = 1

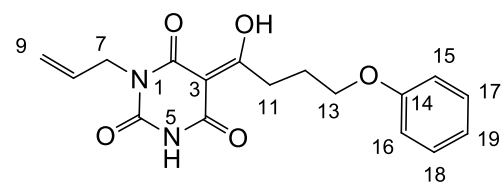

26a

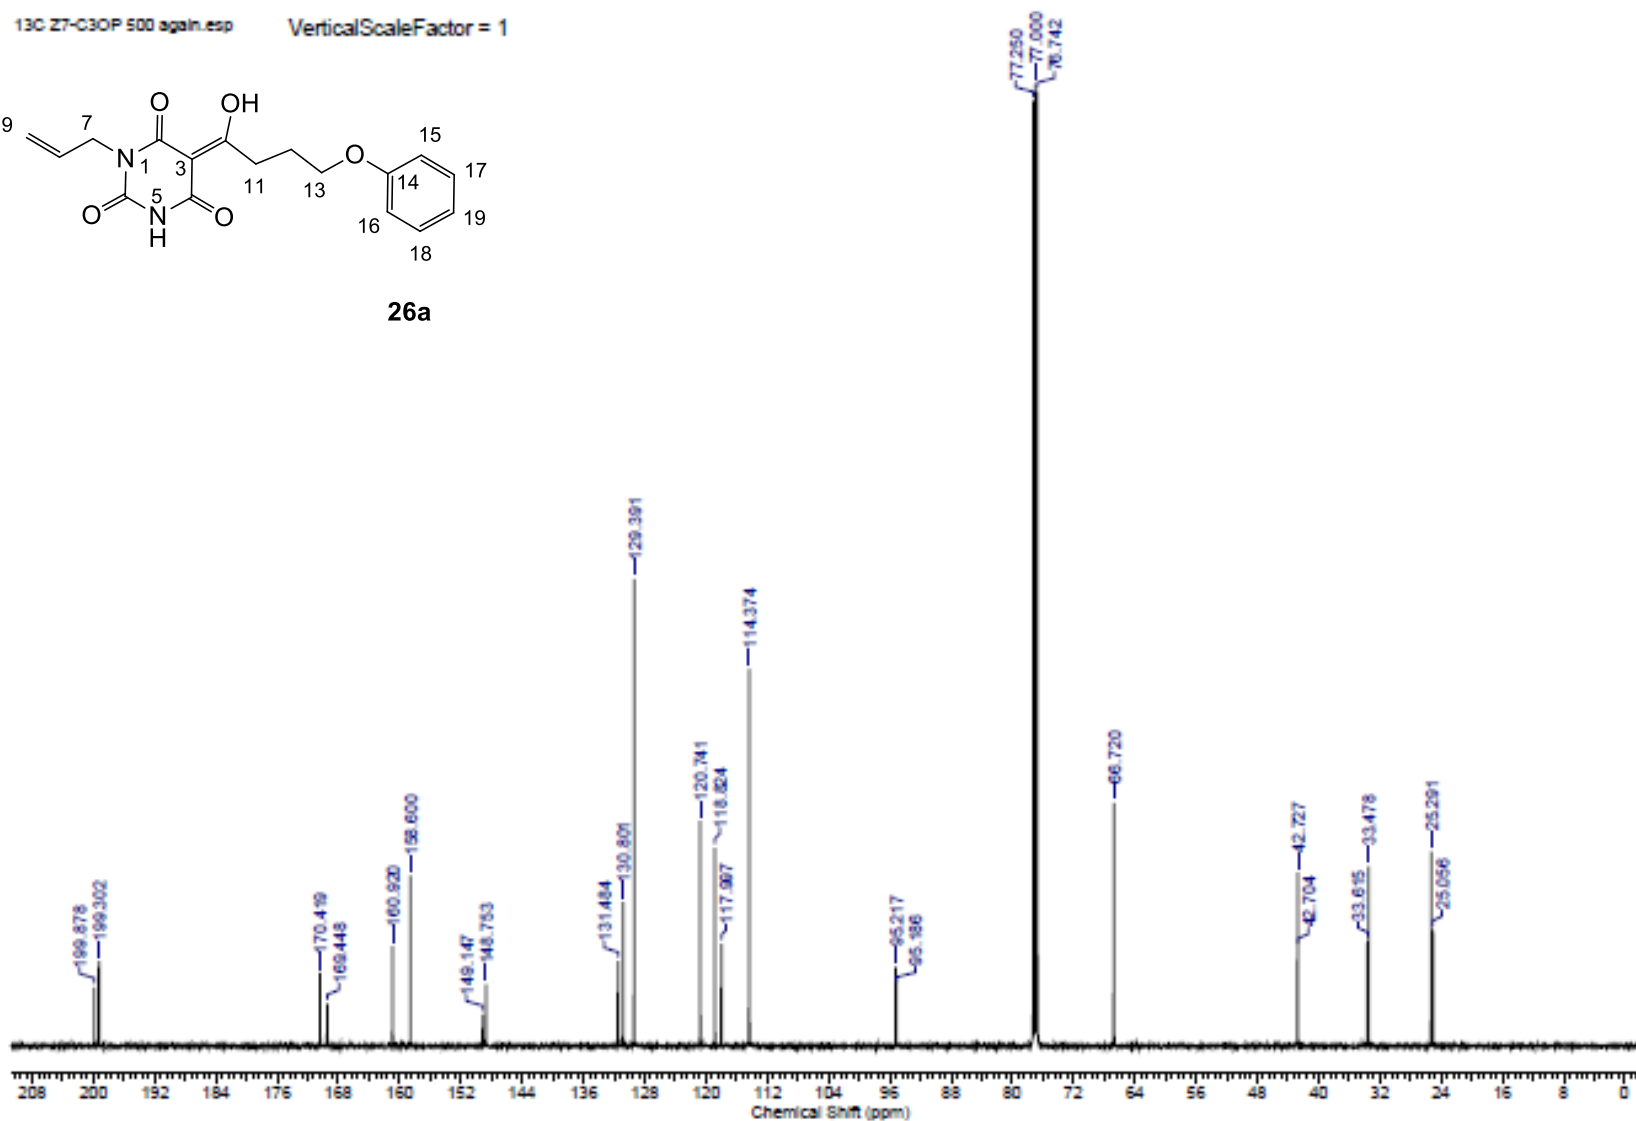

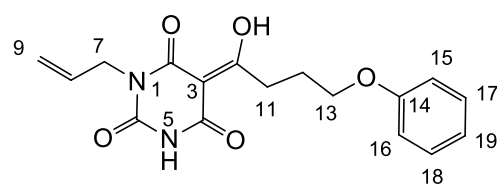

**26a**

HMBC Z7-C3OP 500 again.esp

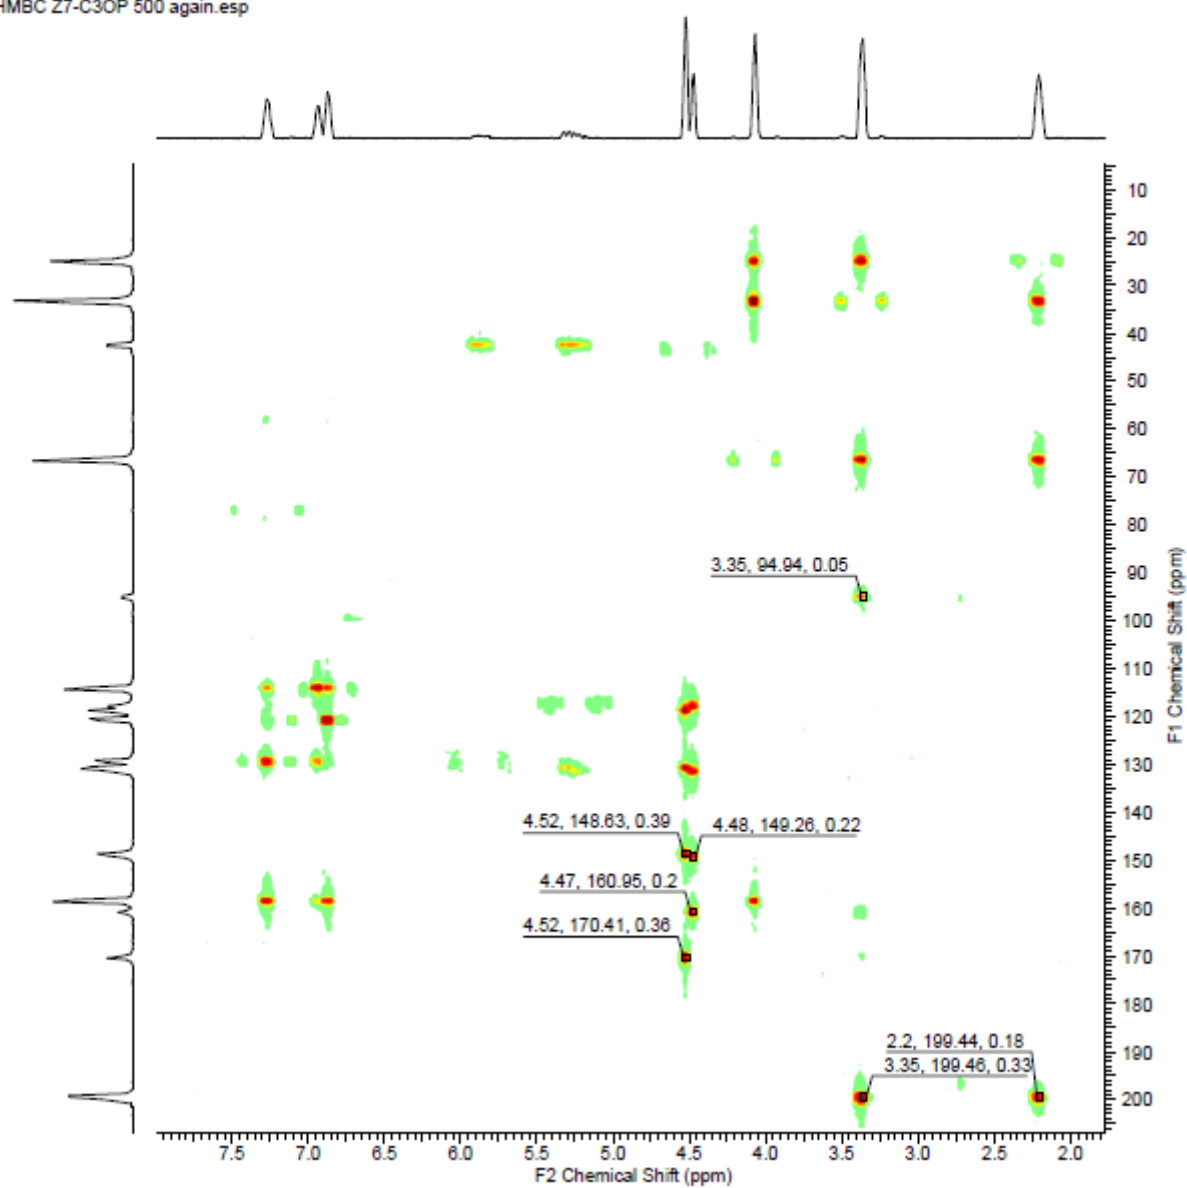

1H Z7-C3OP2 exp G481.esp

VerticalScaleFactor = 1

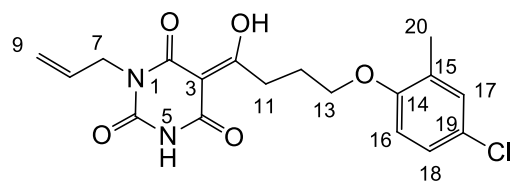

**26b**

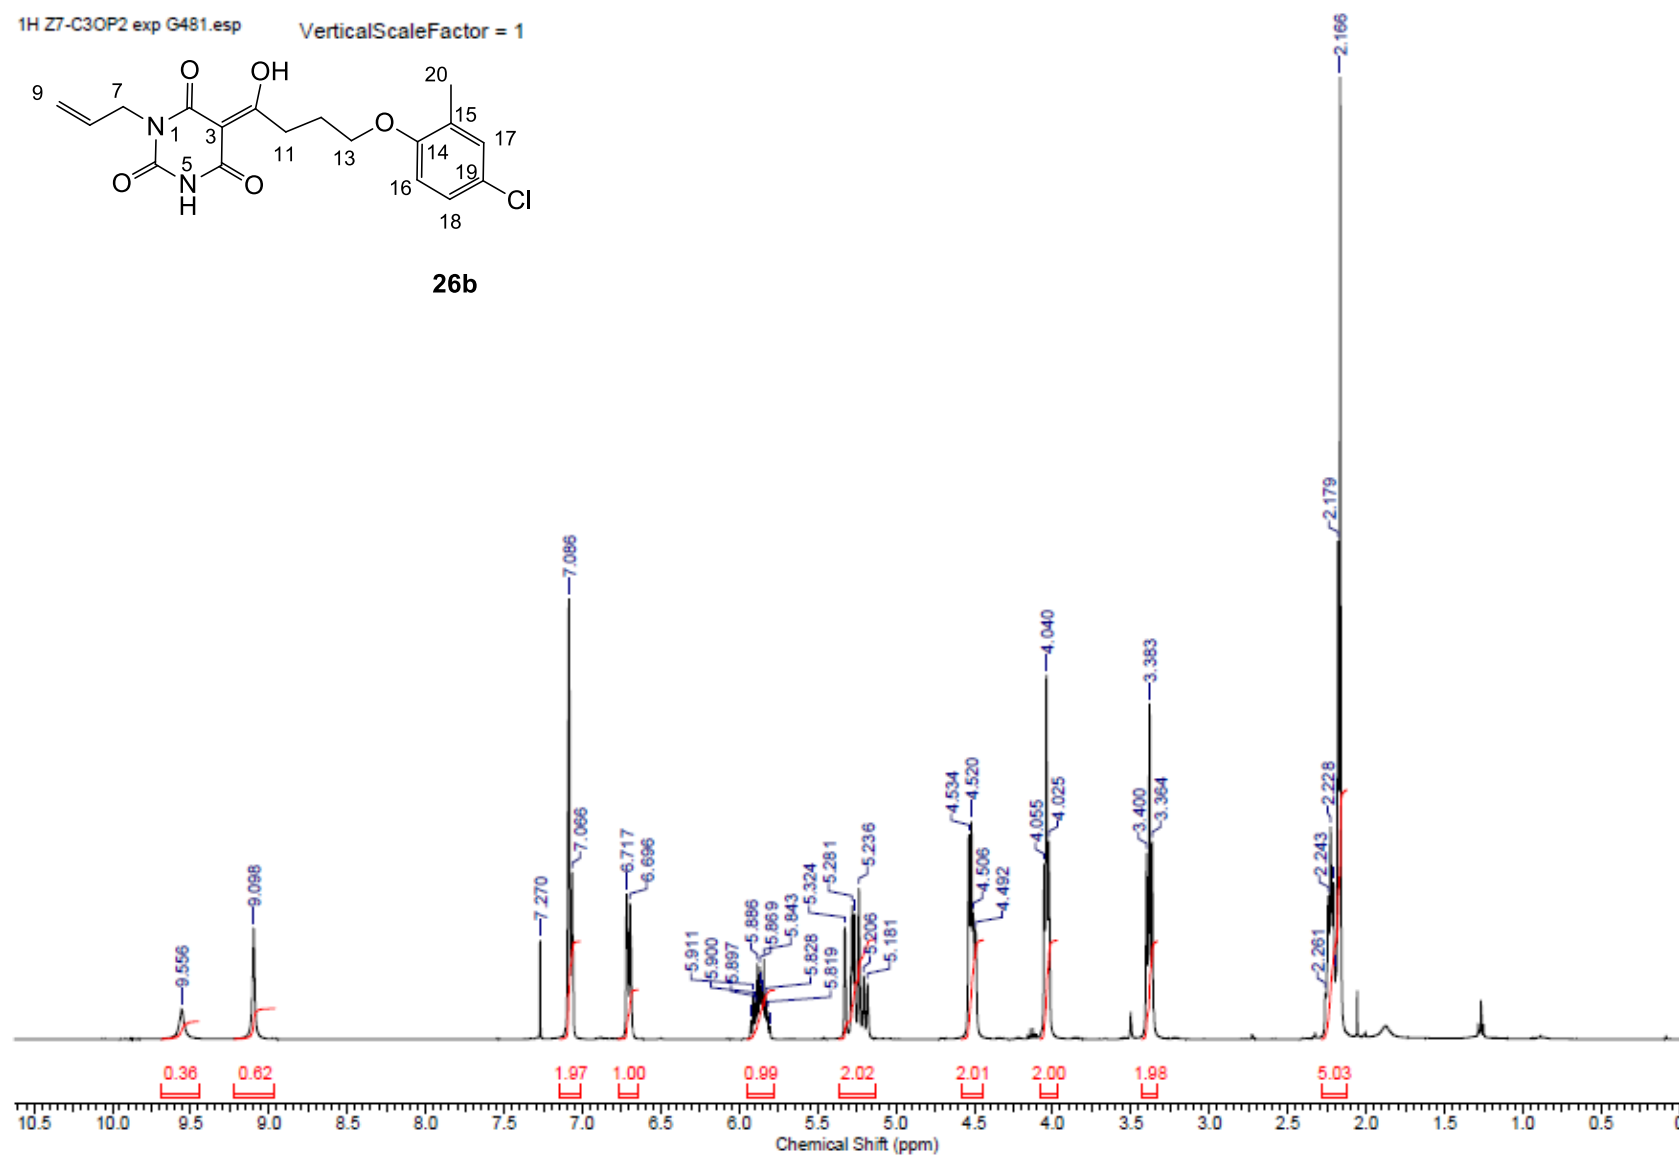

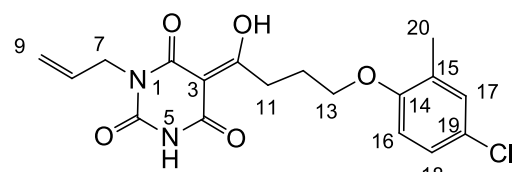**26b**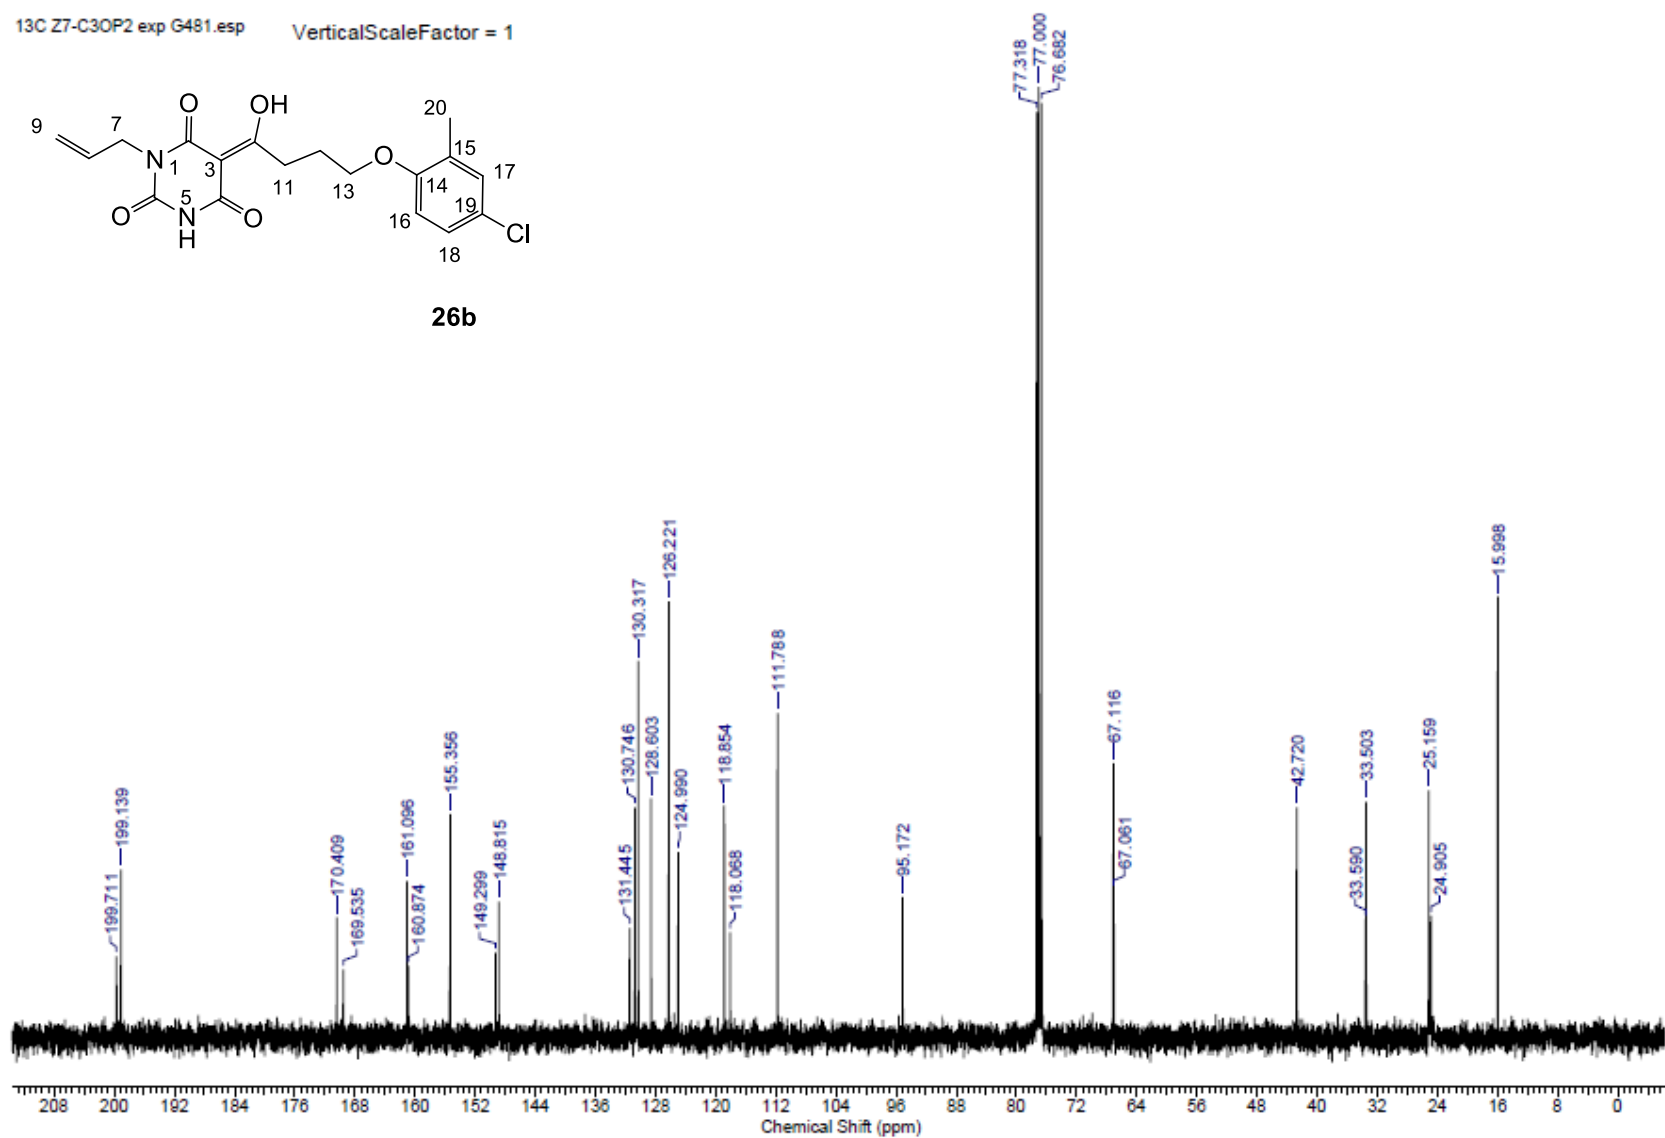

1H Z4-C30PC exp 0453 .esp VerticalScaleFactor = 1

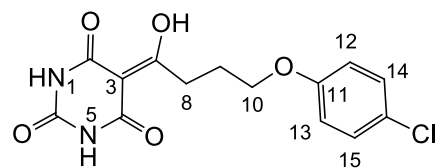

**26c**

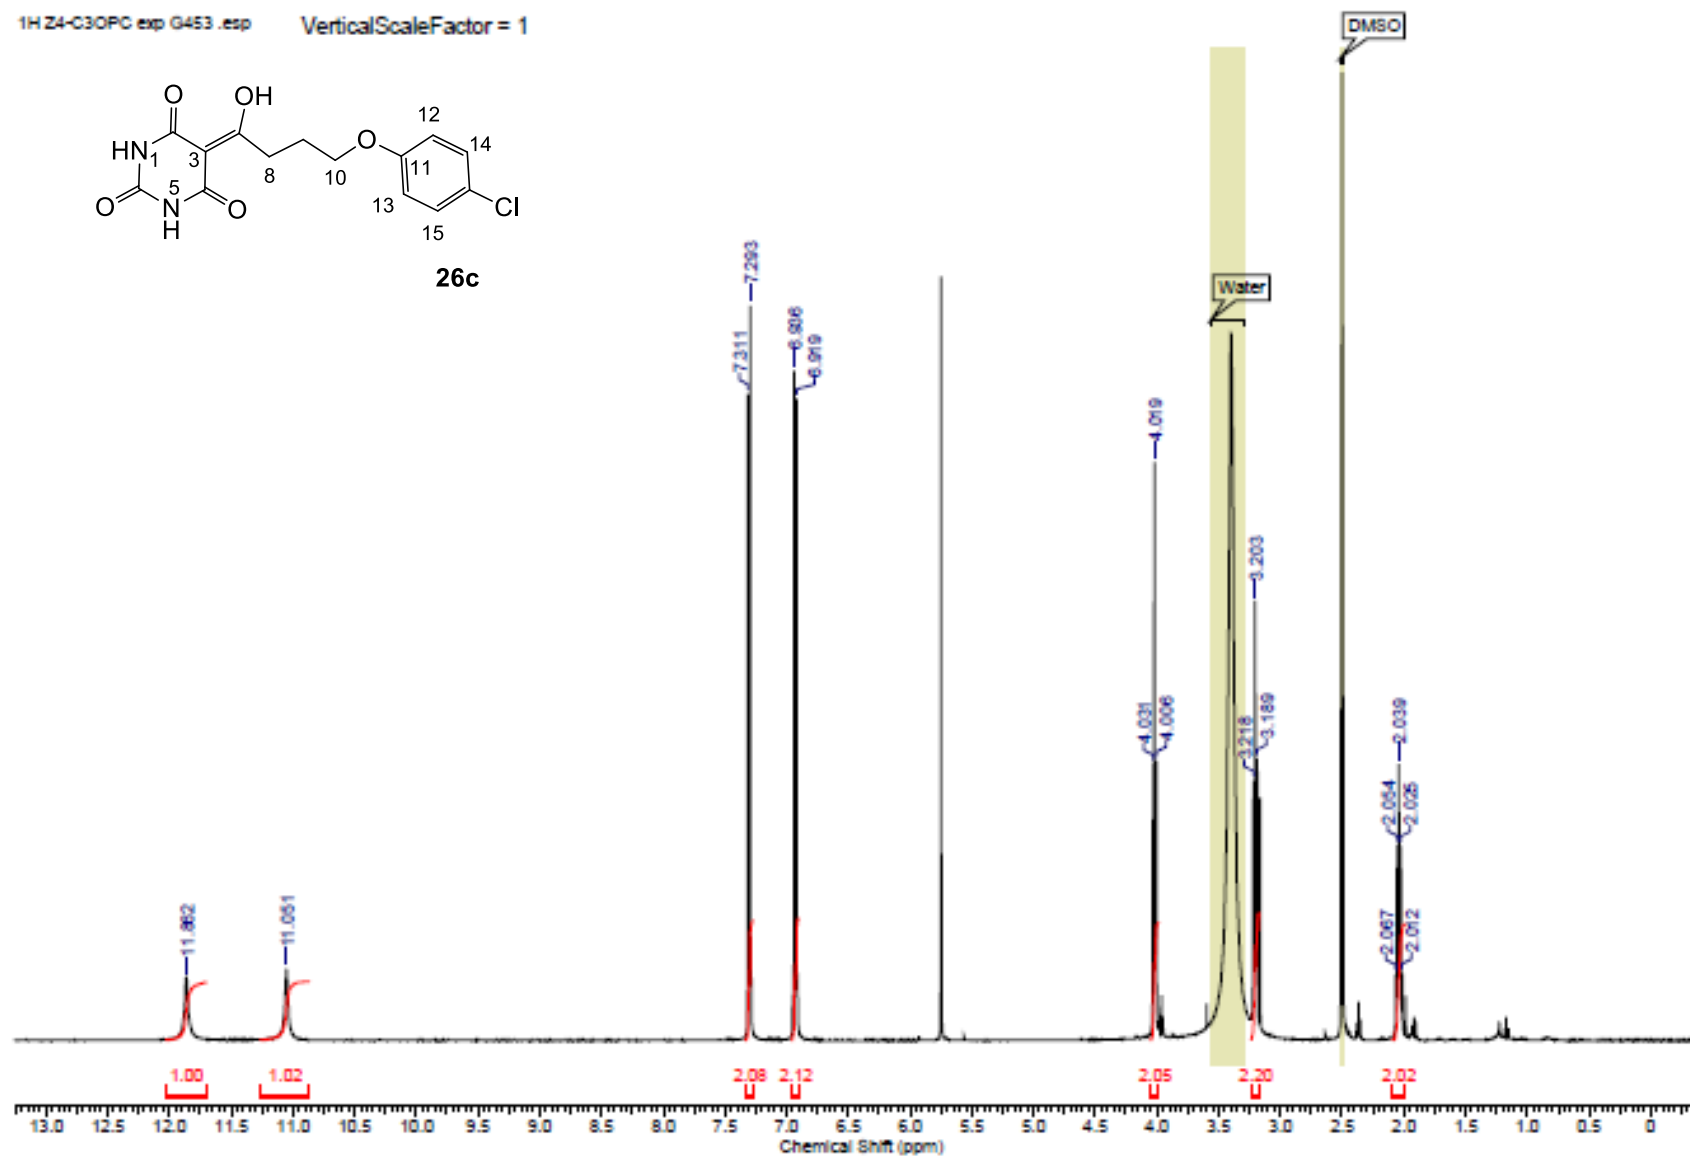

13C Z4-C30PC exp 0453 500.exp VerticalScaleFactor = 1

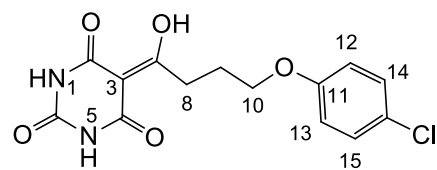

**26c**

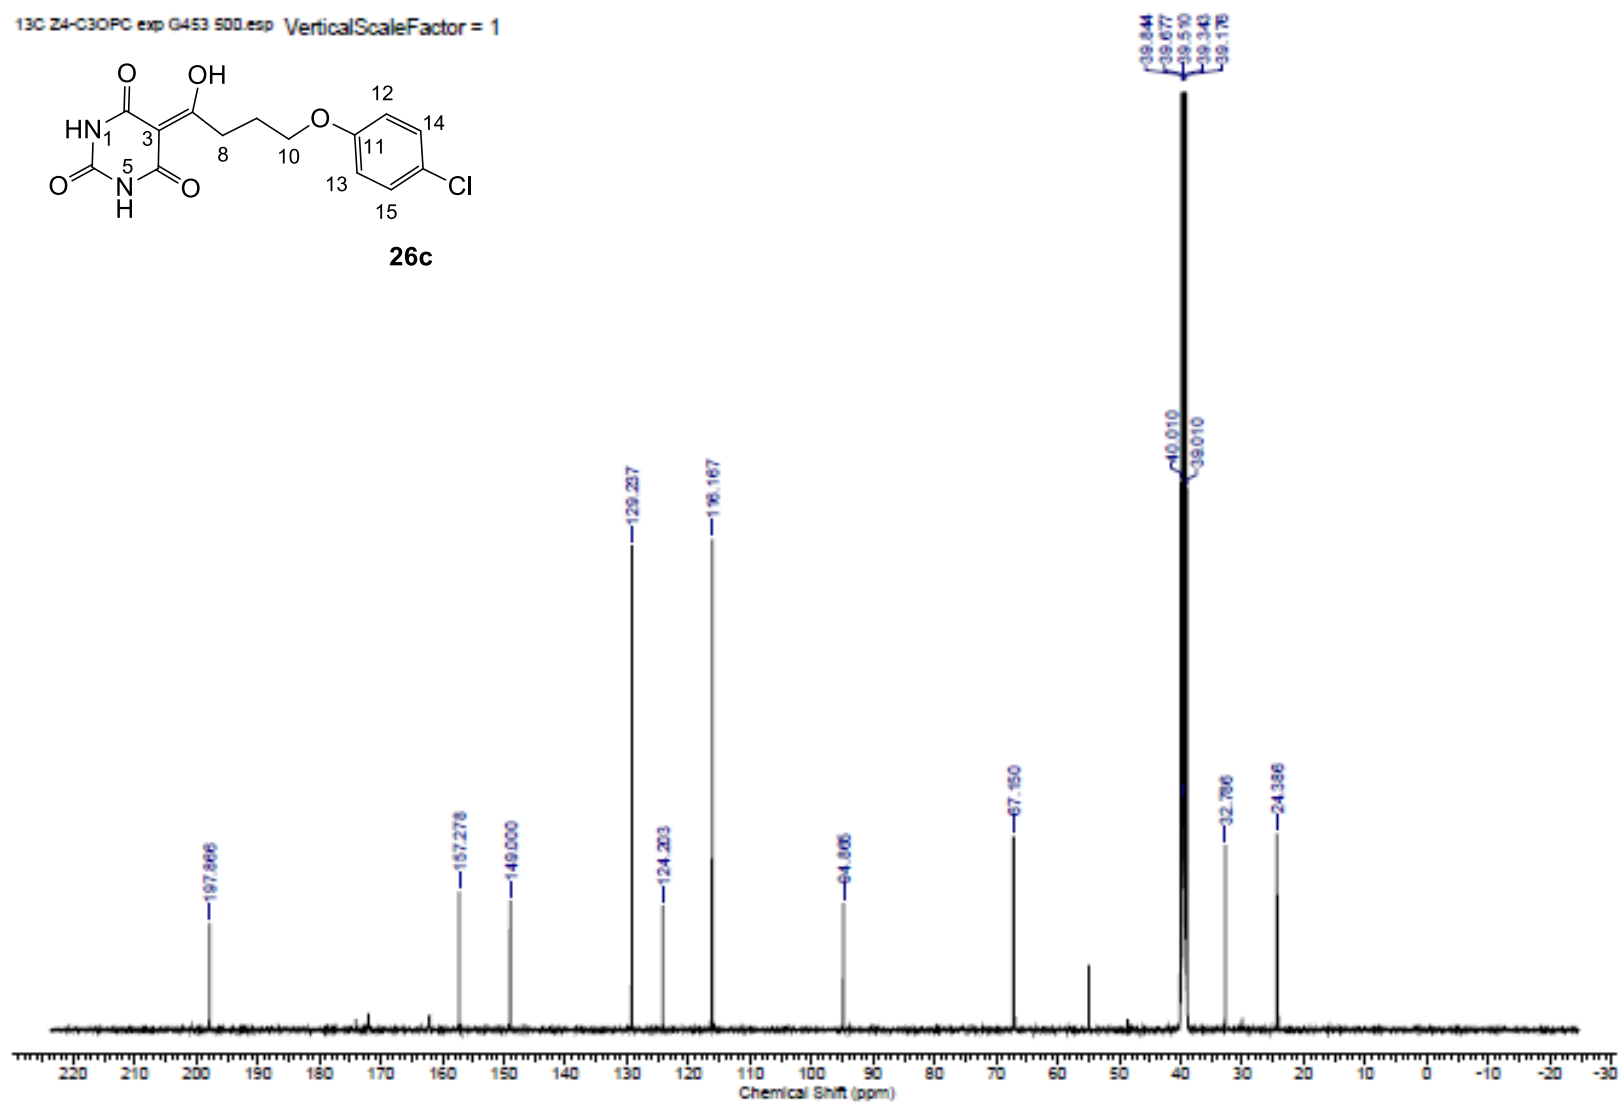

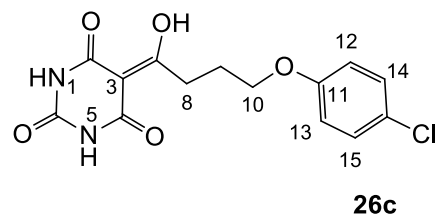

HMBC Z4-C3OPC exp G453 .esp

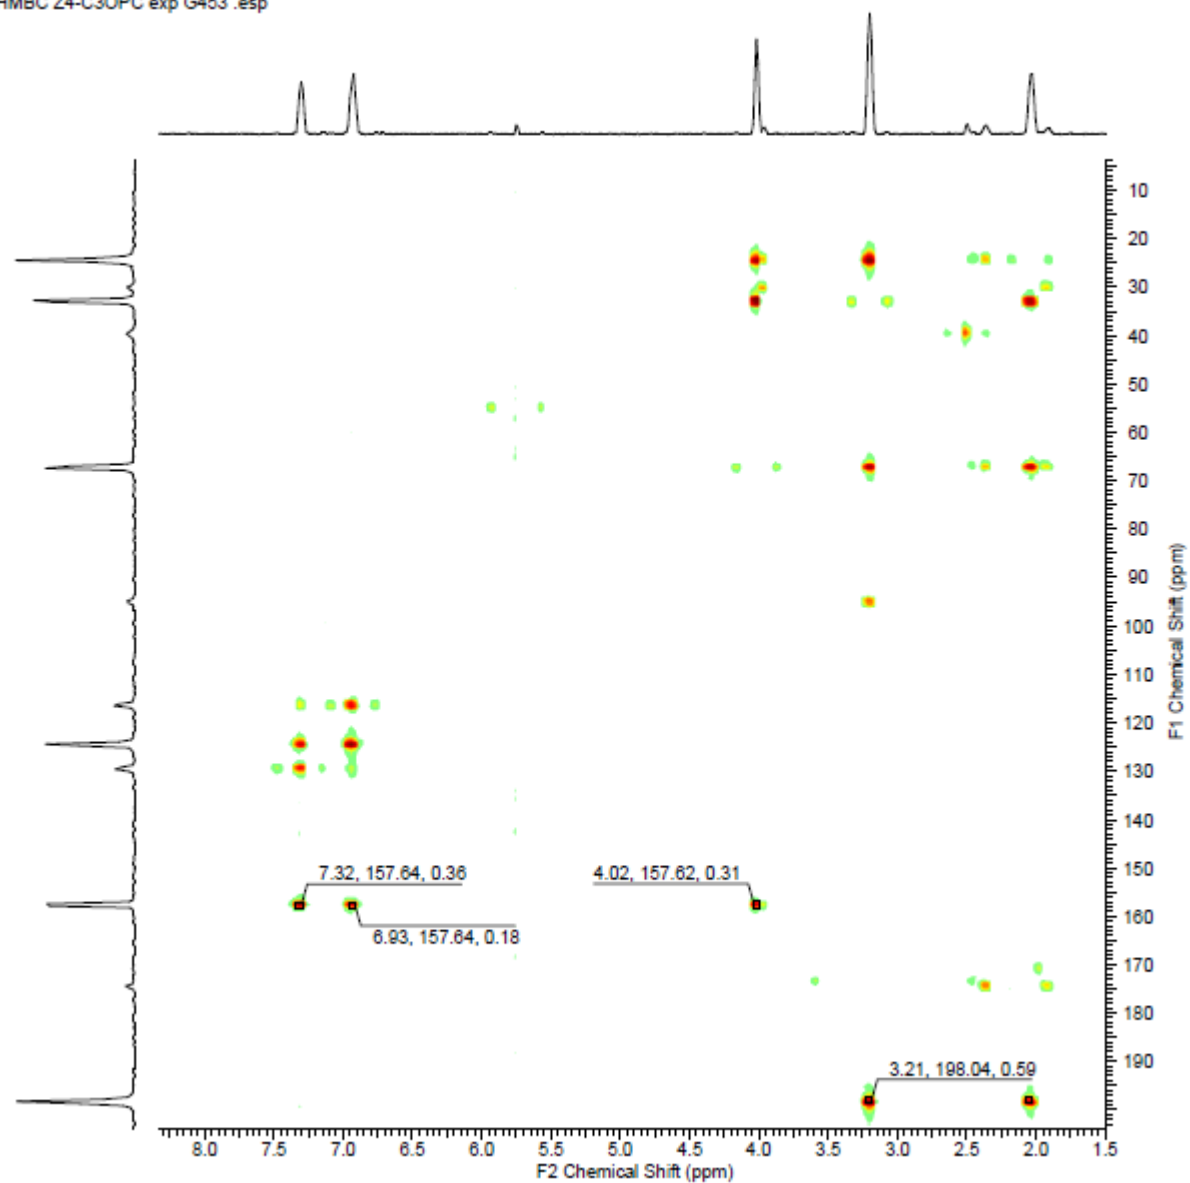



1H Z4-C3OP2 exp G439.esp

VerticalScaleFactor = 1

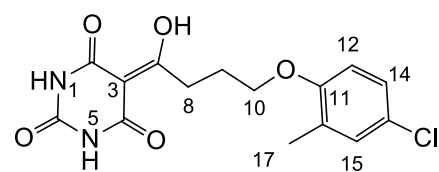

26d

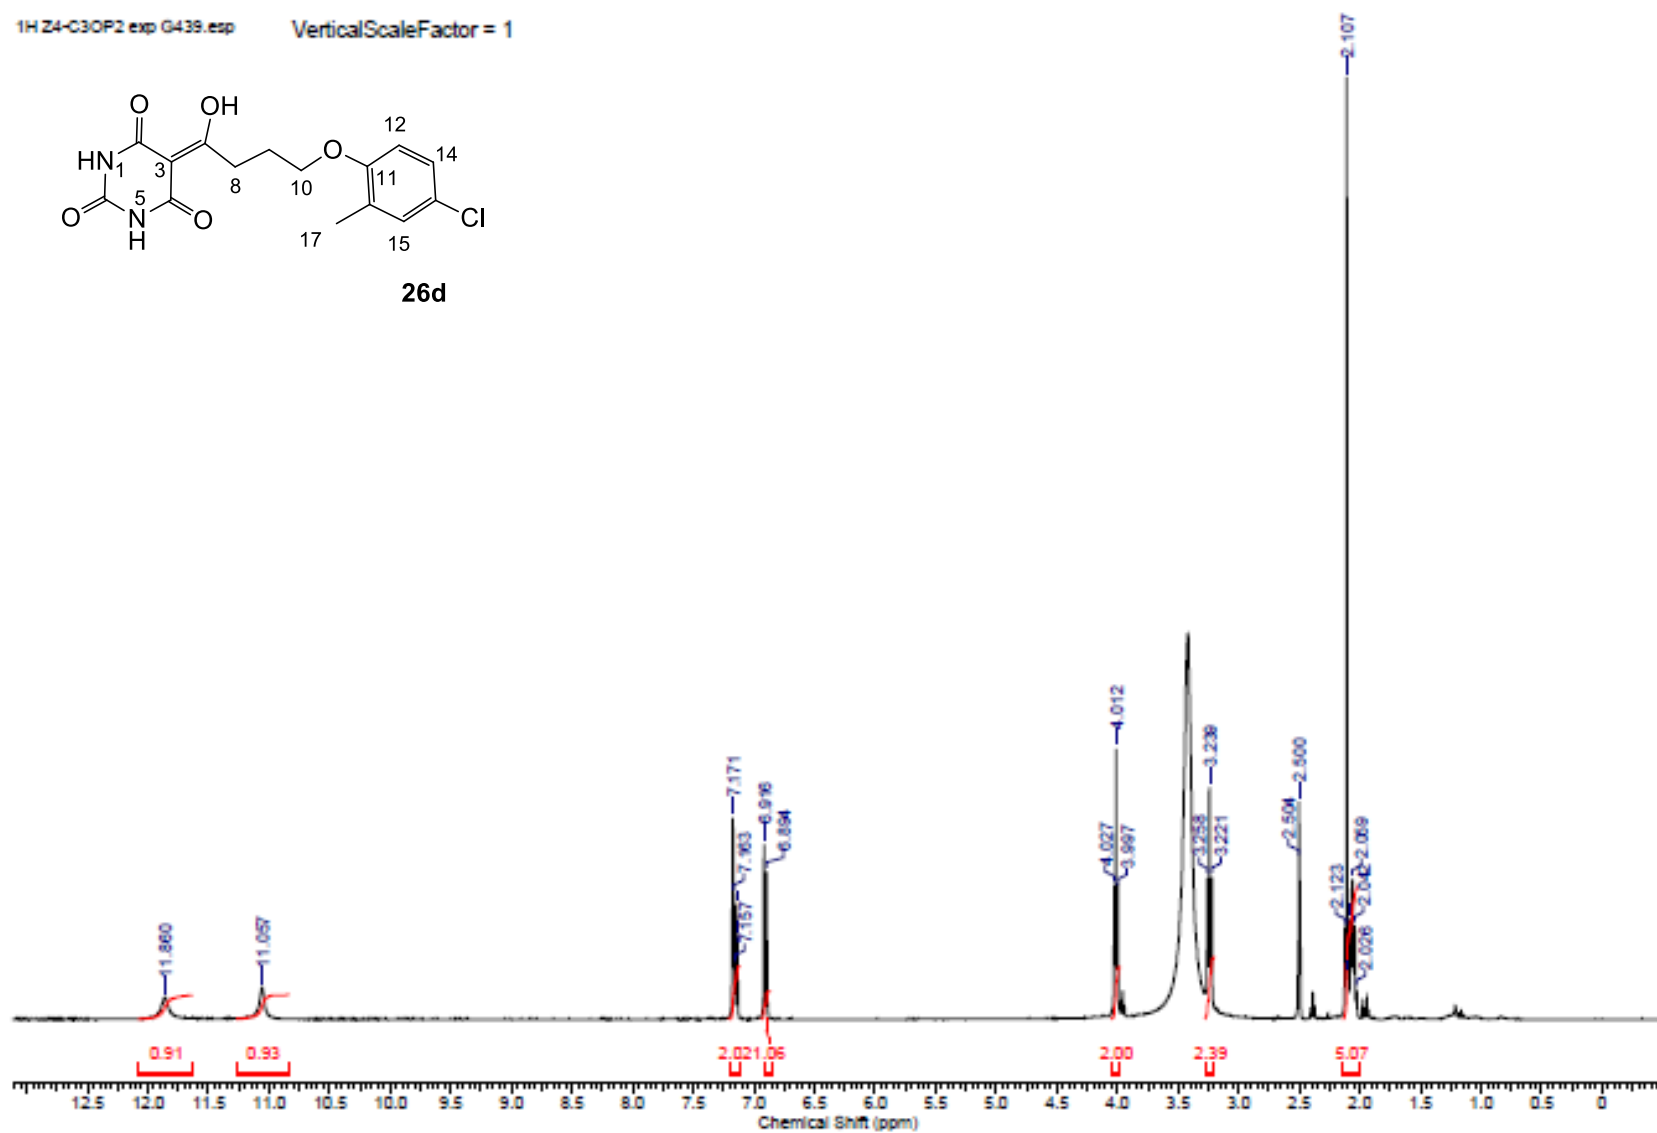

13C Z4-C3OP2 exp G439.fsp

VerticalScaleFactor = 1

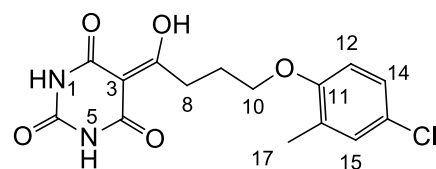

**26d**

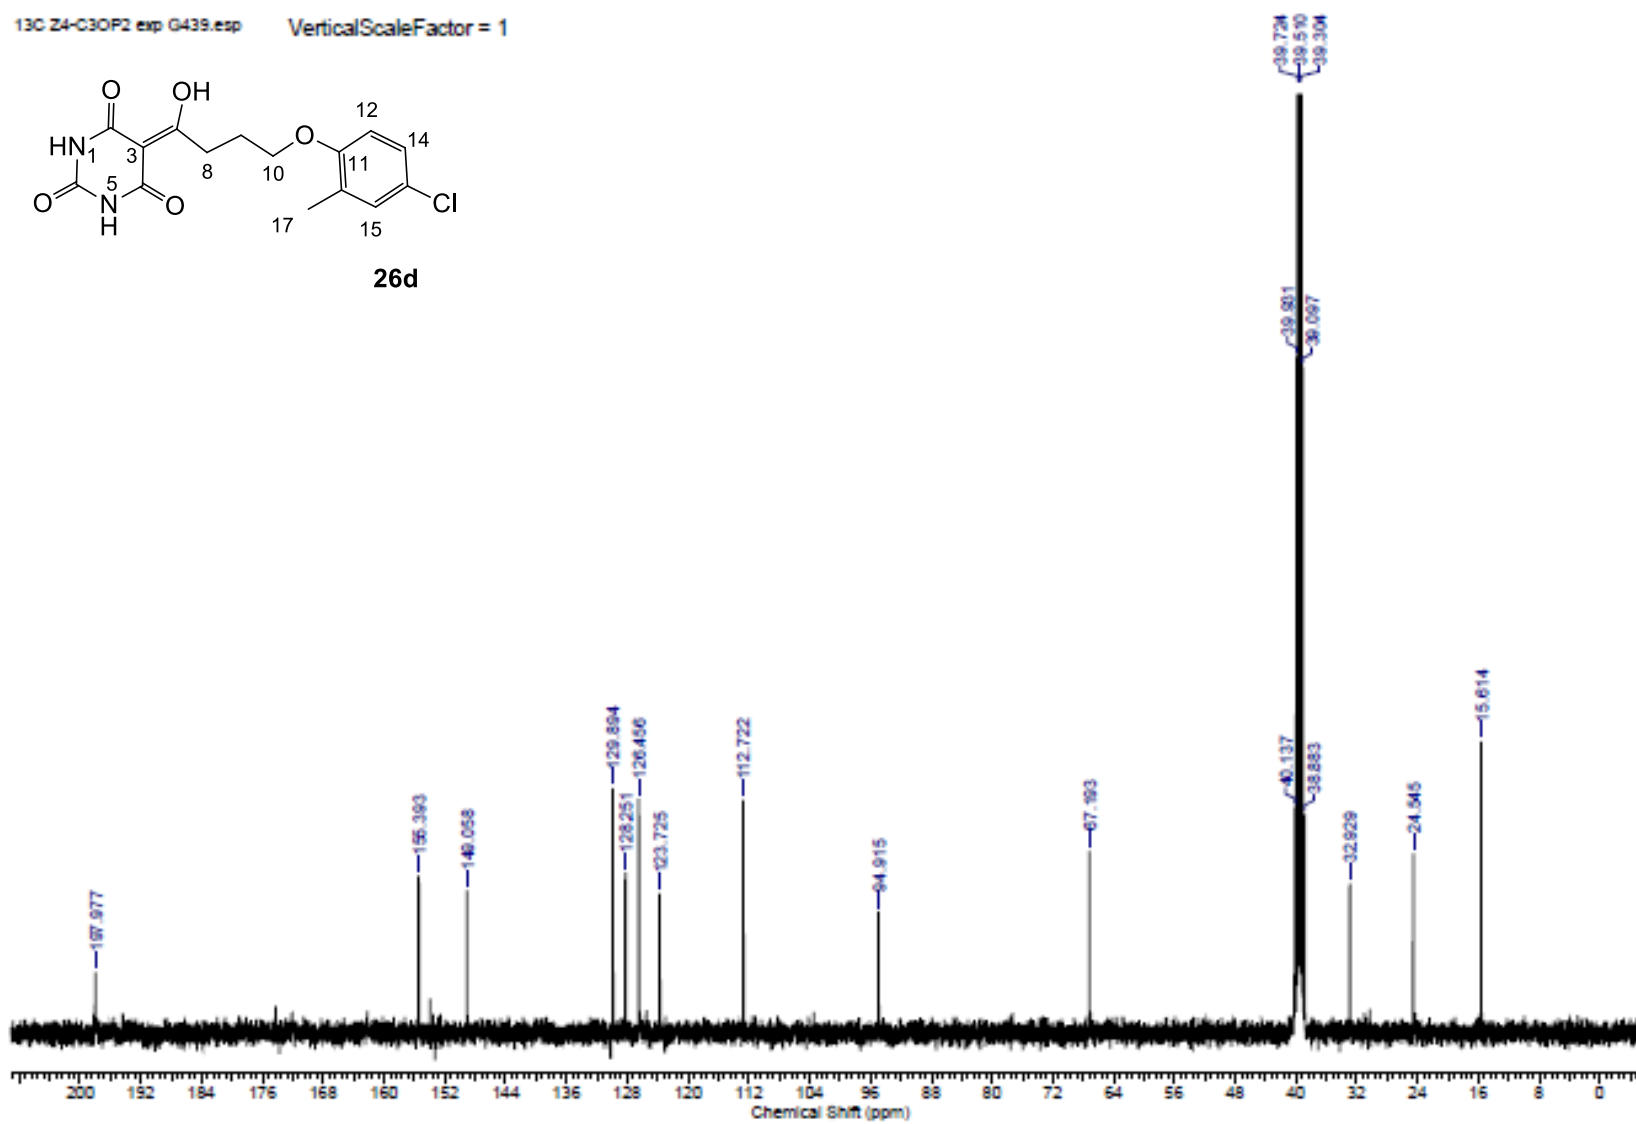

1H Z4-C1NR CDCl3 + MeOD.esp VerticalScaleFactor = 1

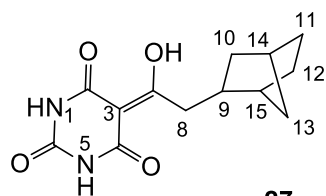

27

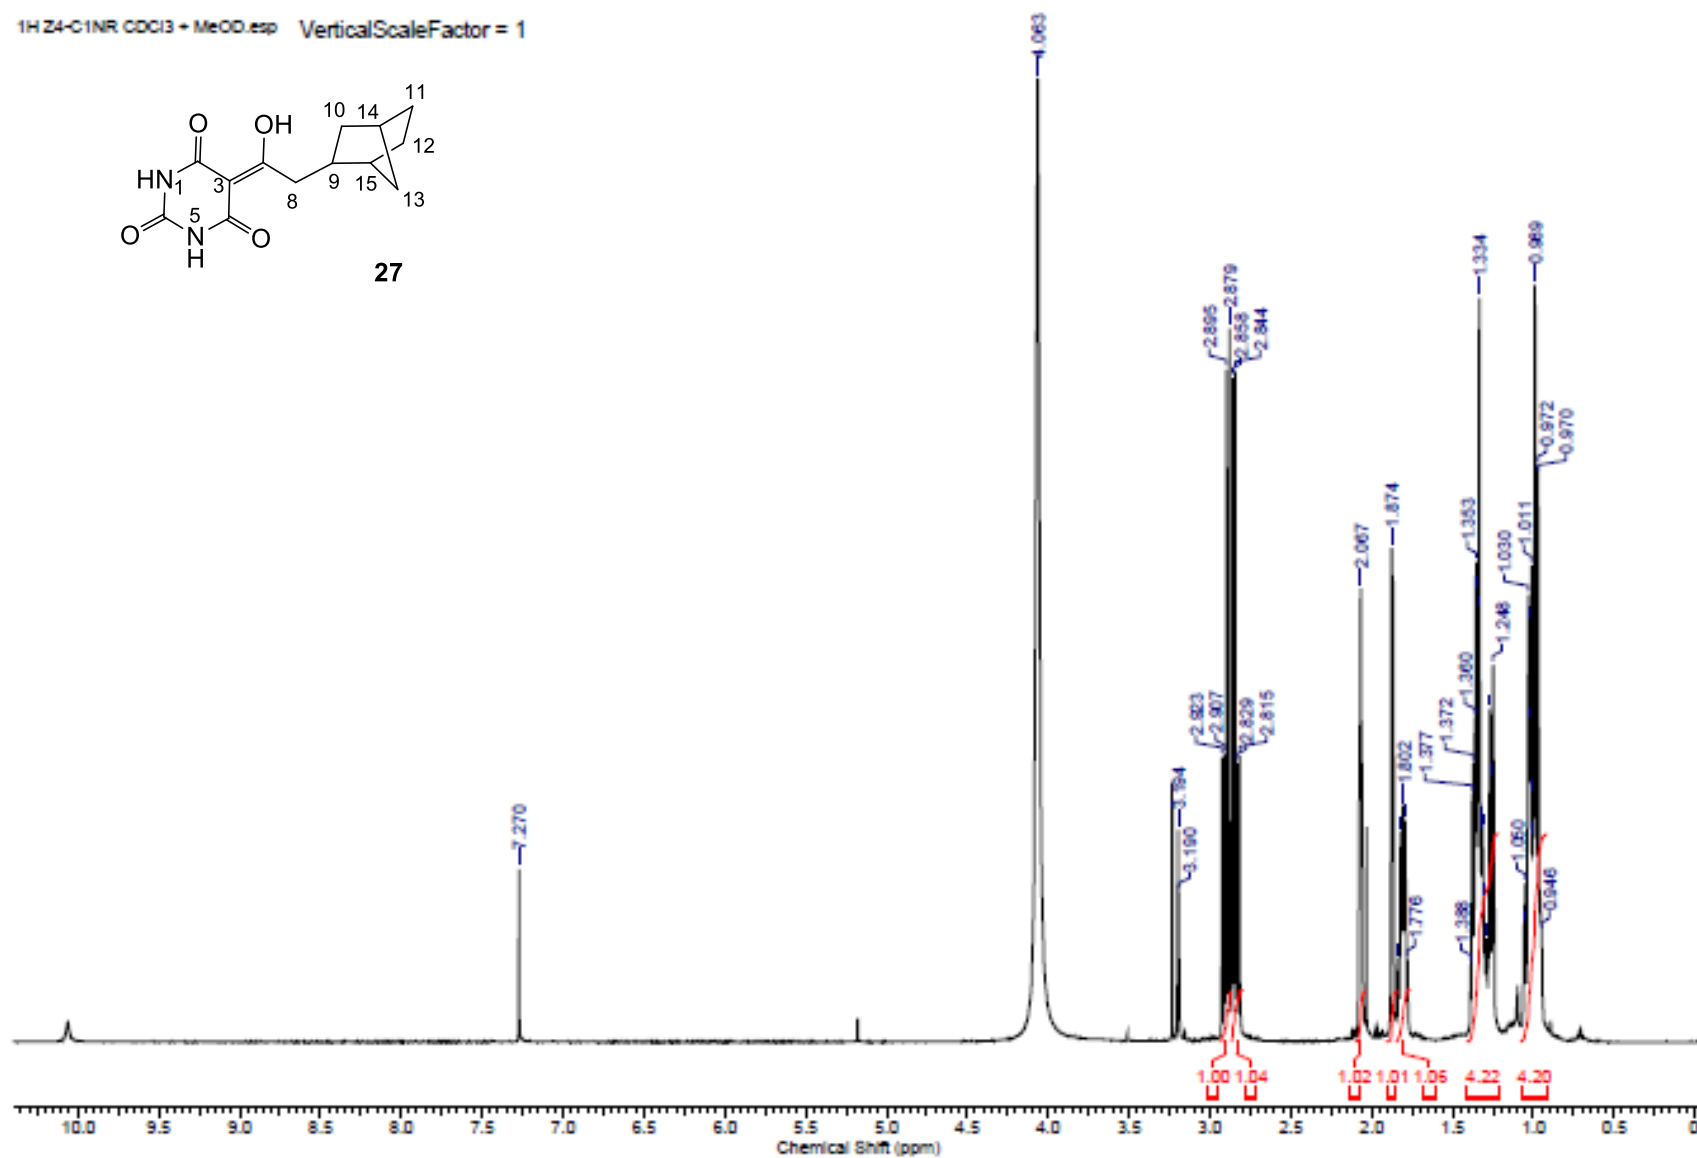

13C Z4-C1NR CDCl3 + MeOD.esp VerticalScaleFactor = 1

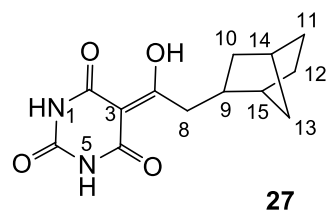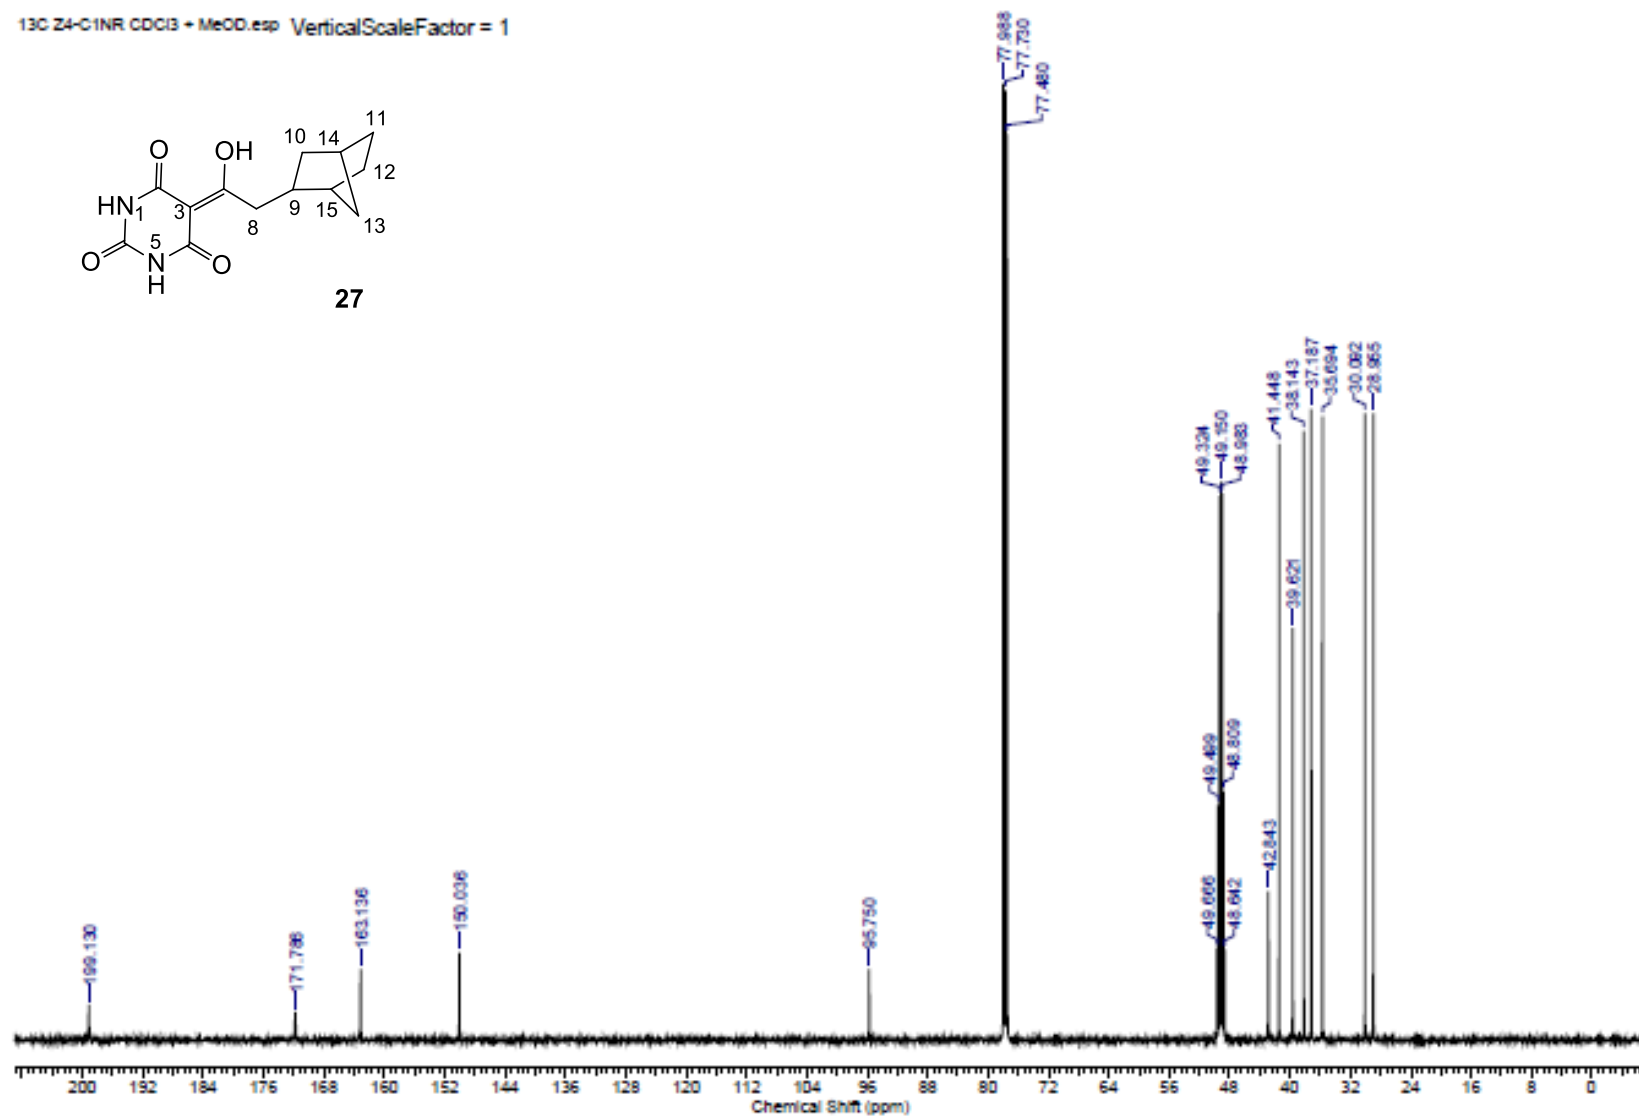

1H Z4-C1P exp G457 500.exp

VerticalScaleFactor = 1

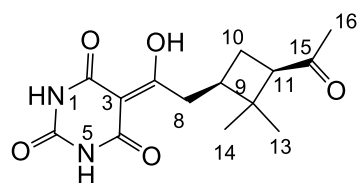

**cis-28**

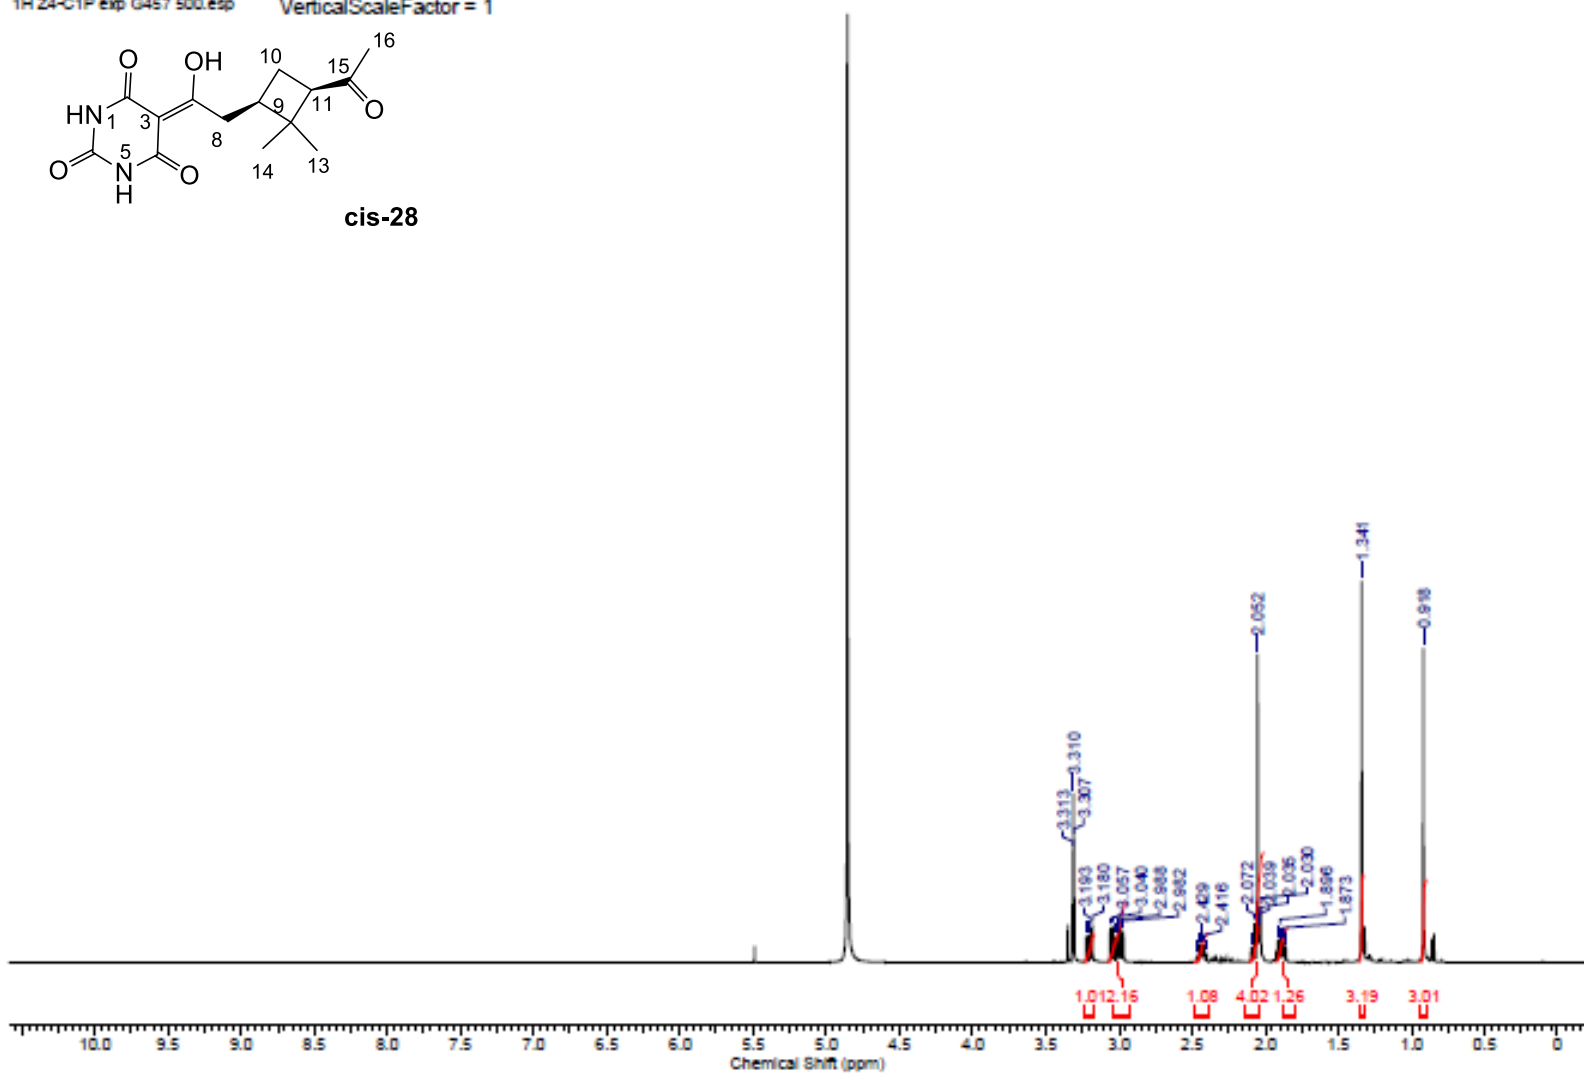

13C Z4-C1P exp 0457 500.esp VerticalScaleFactor = 1

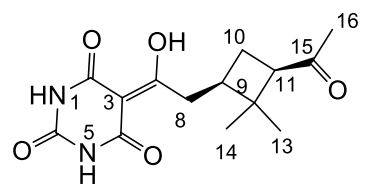

**cis-28**

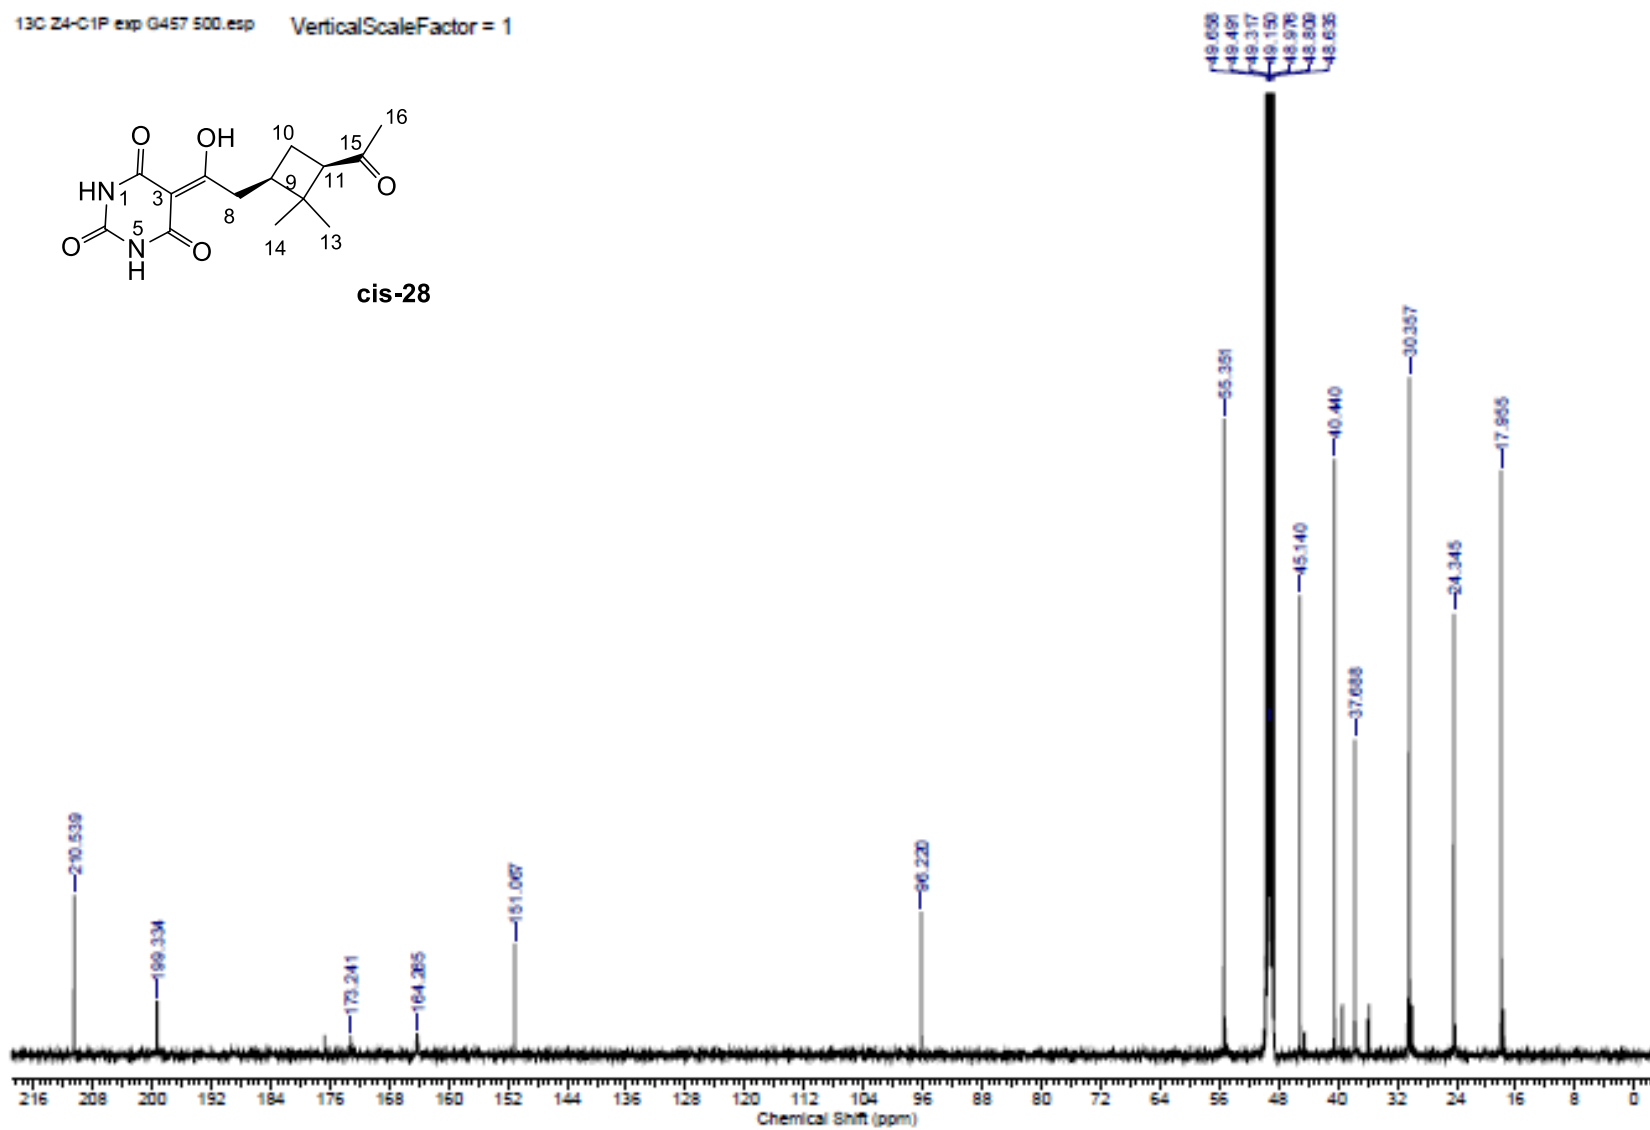

1H ZTA3-OTMH exp 0408.exp VerticalScaleFactor = 1

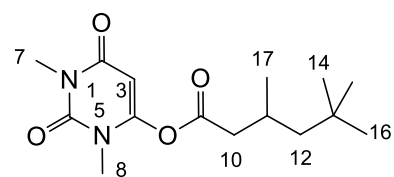

41

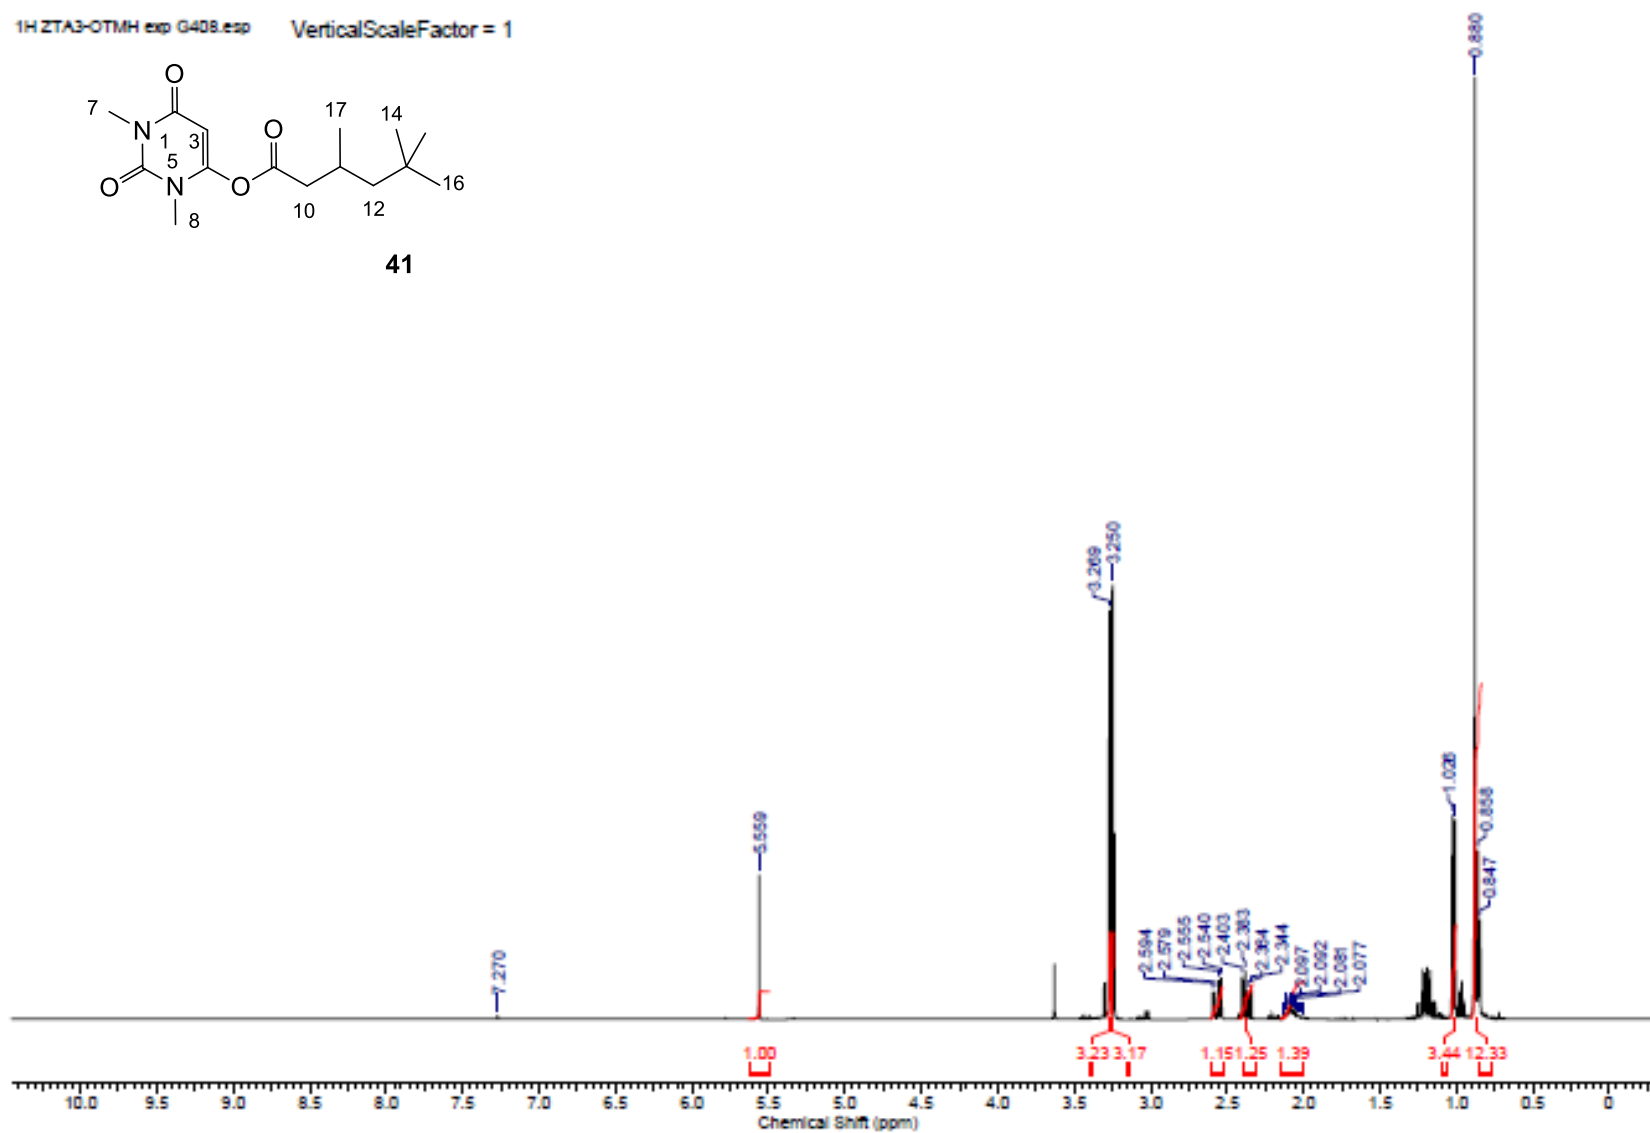

13C ZTA3-OTMH exp G408.esp VerticalScaleFactor = 1

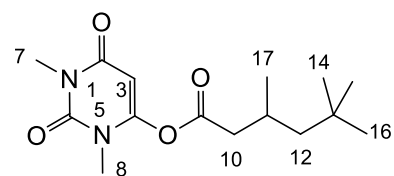

41

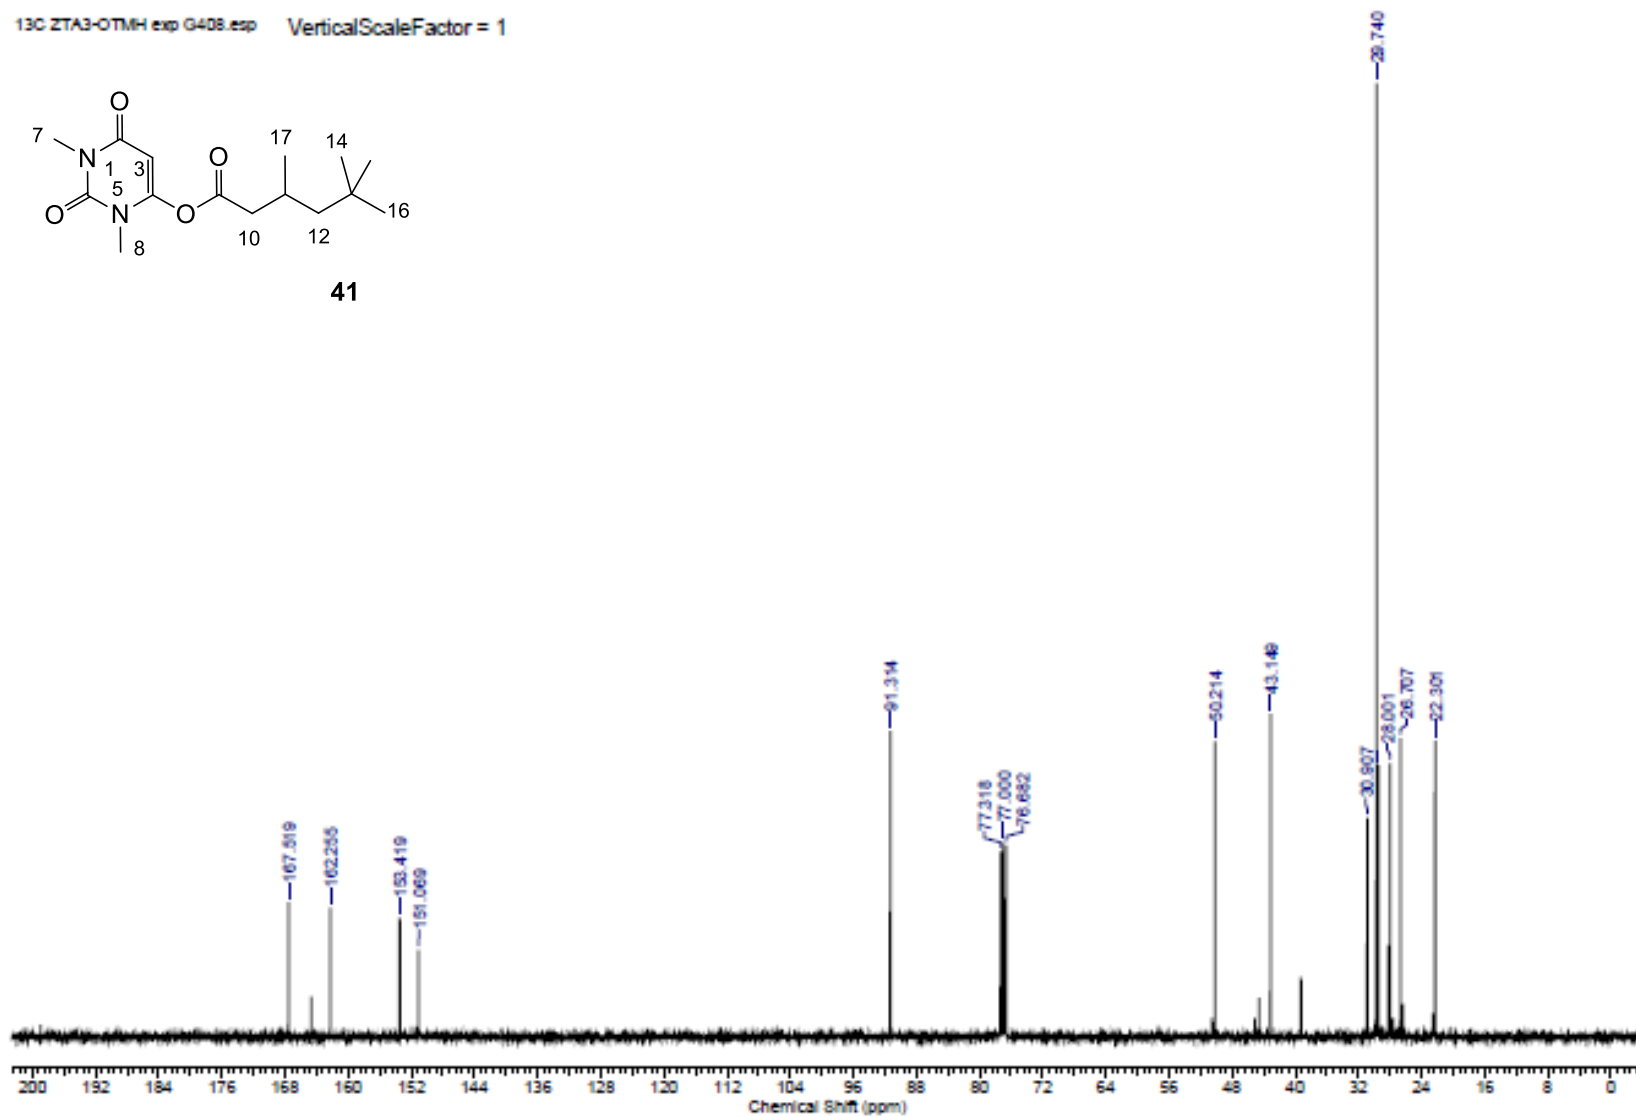



1H ZTA3-TMH exp G415.exp

VerticalScaleFactor = 1

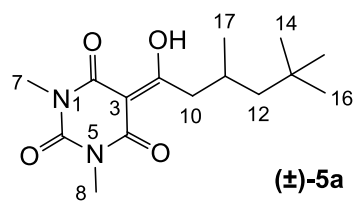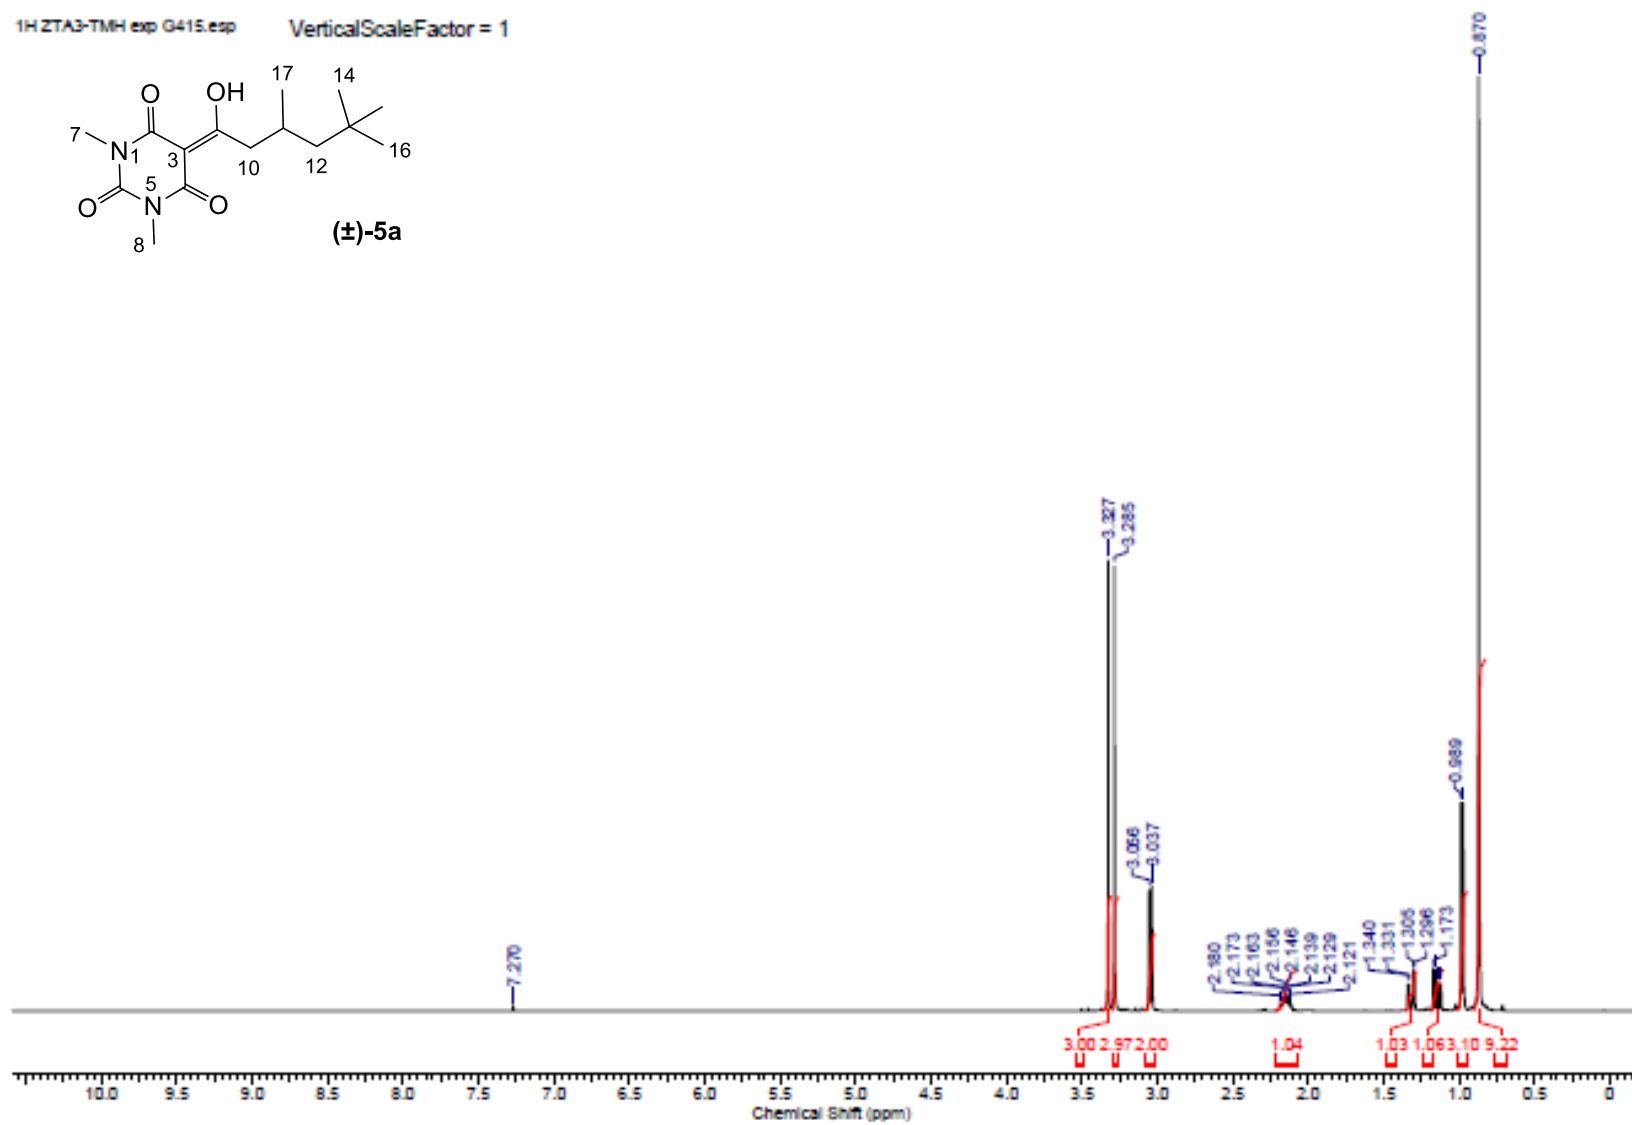

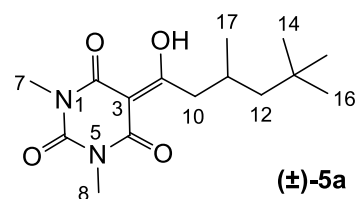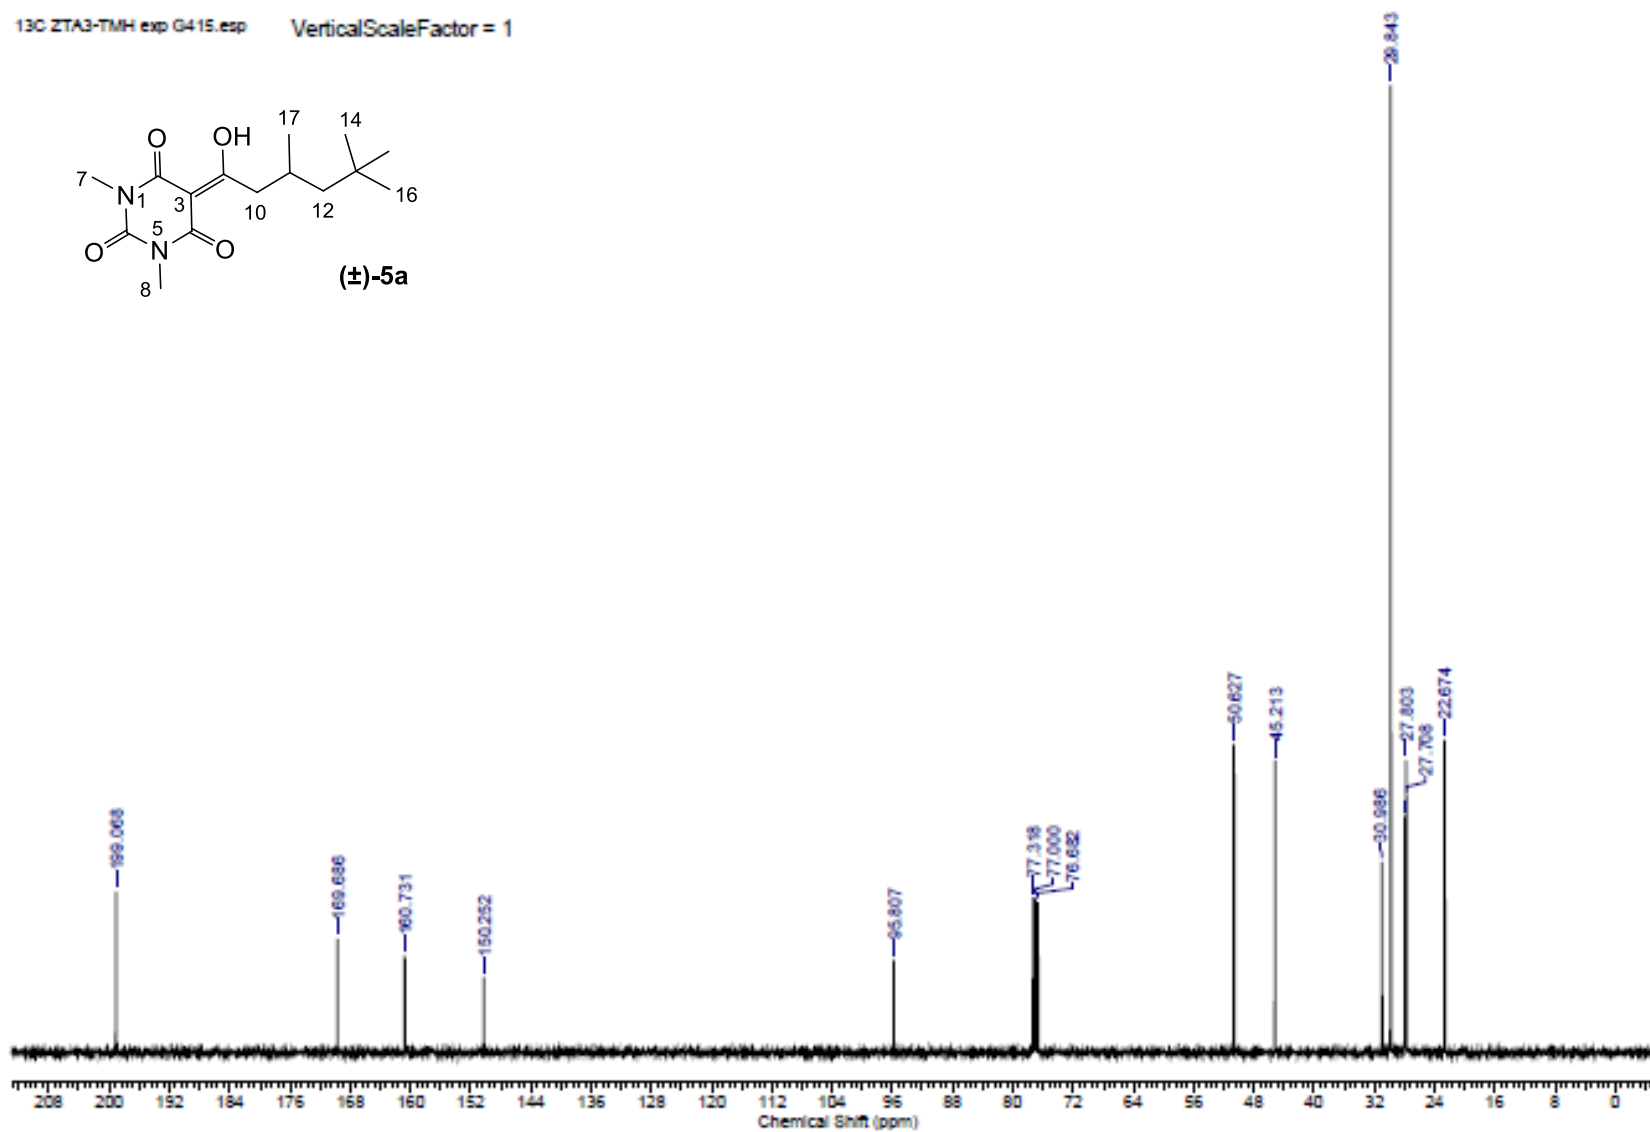

1H Z4N-AP exp G570.esp

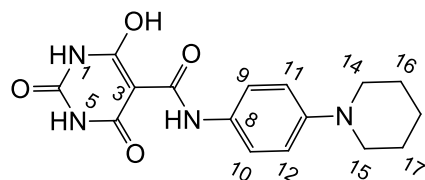

**29a**

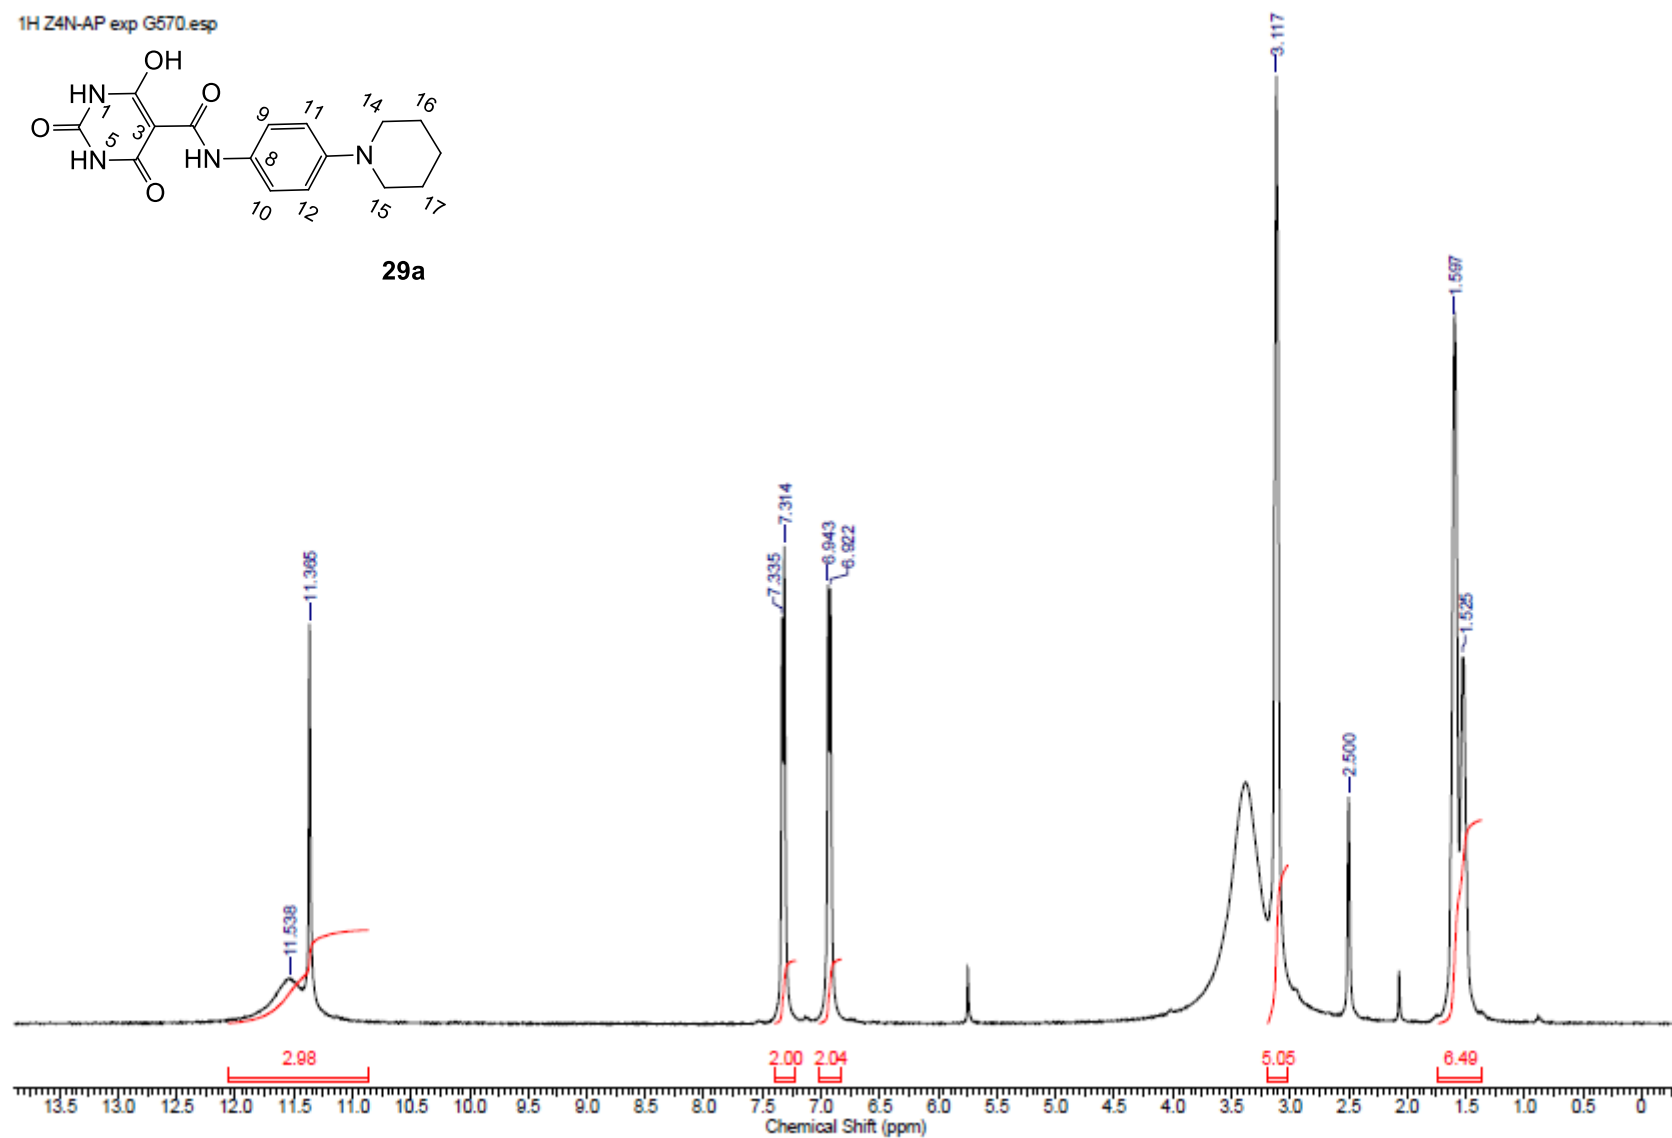

1H Z3N-AP exp G548.esp

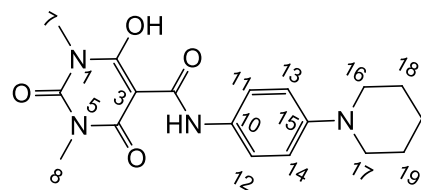

29b

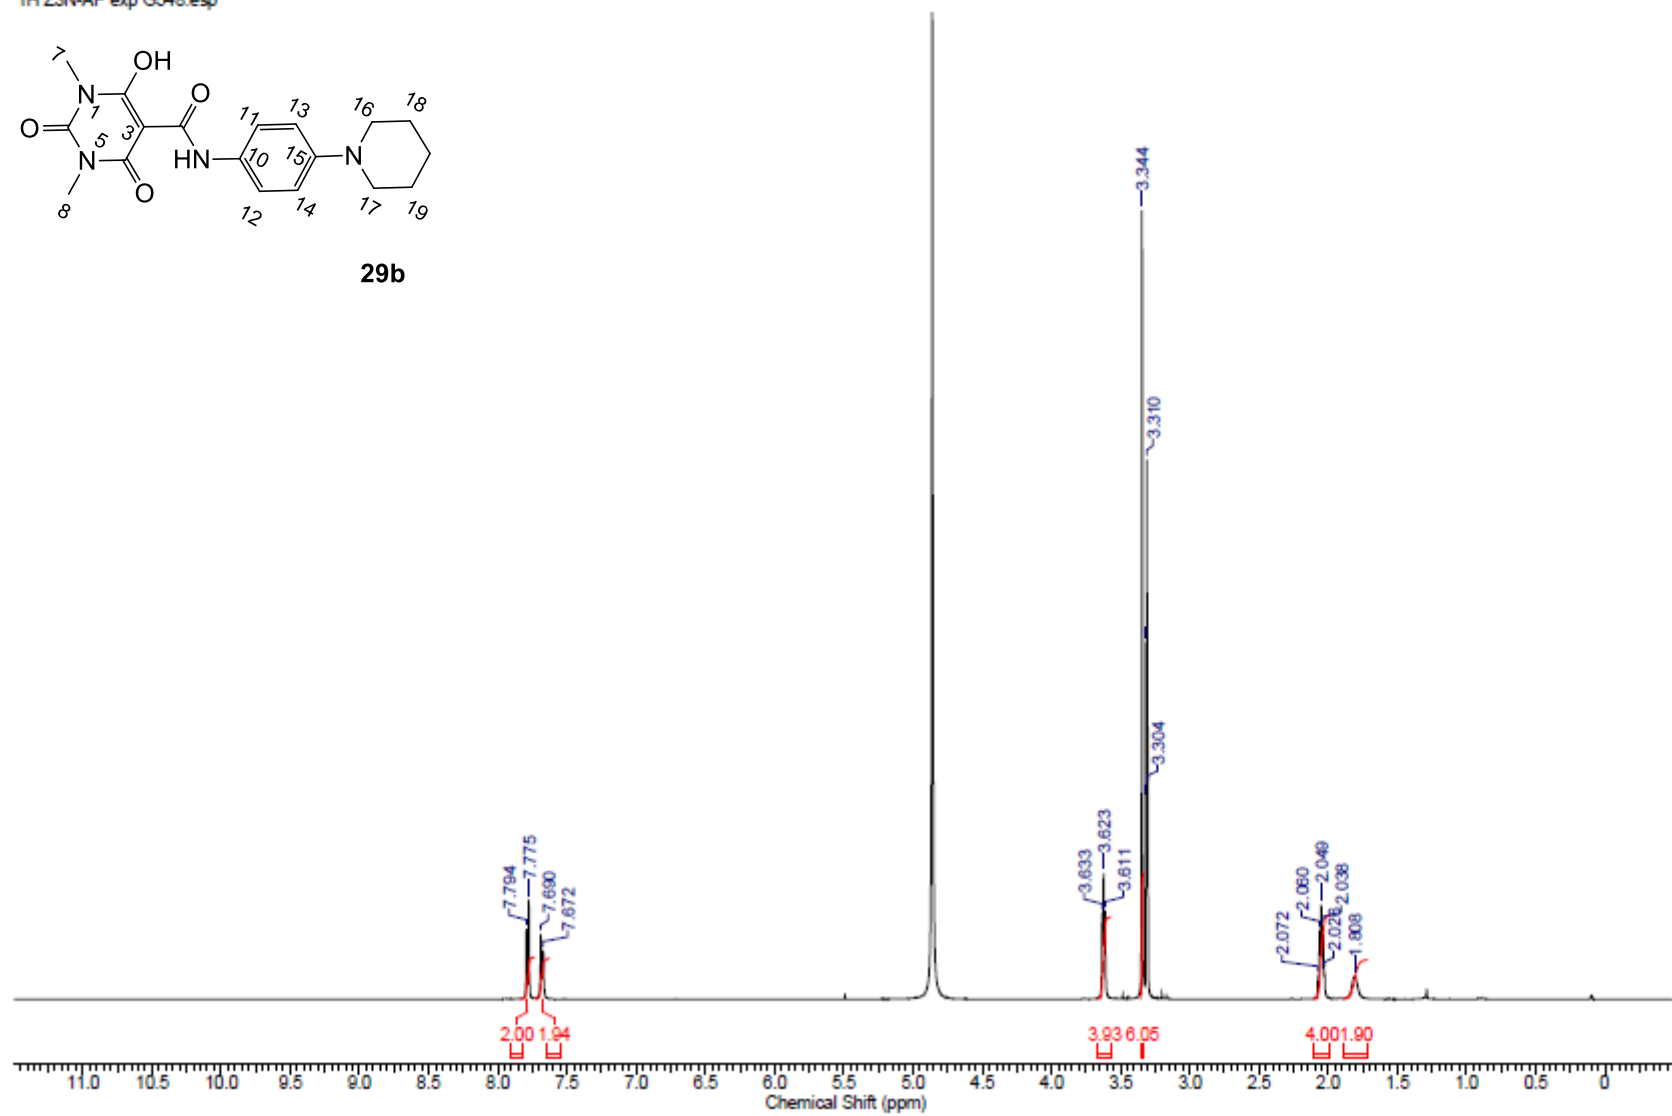

1H Z8N-MP exp G581.esp

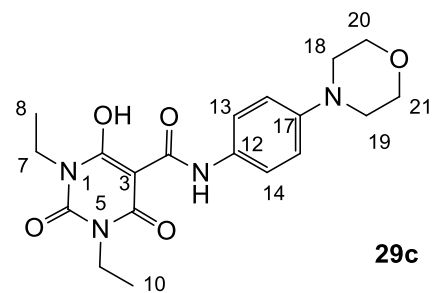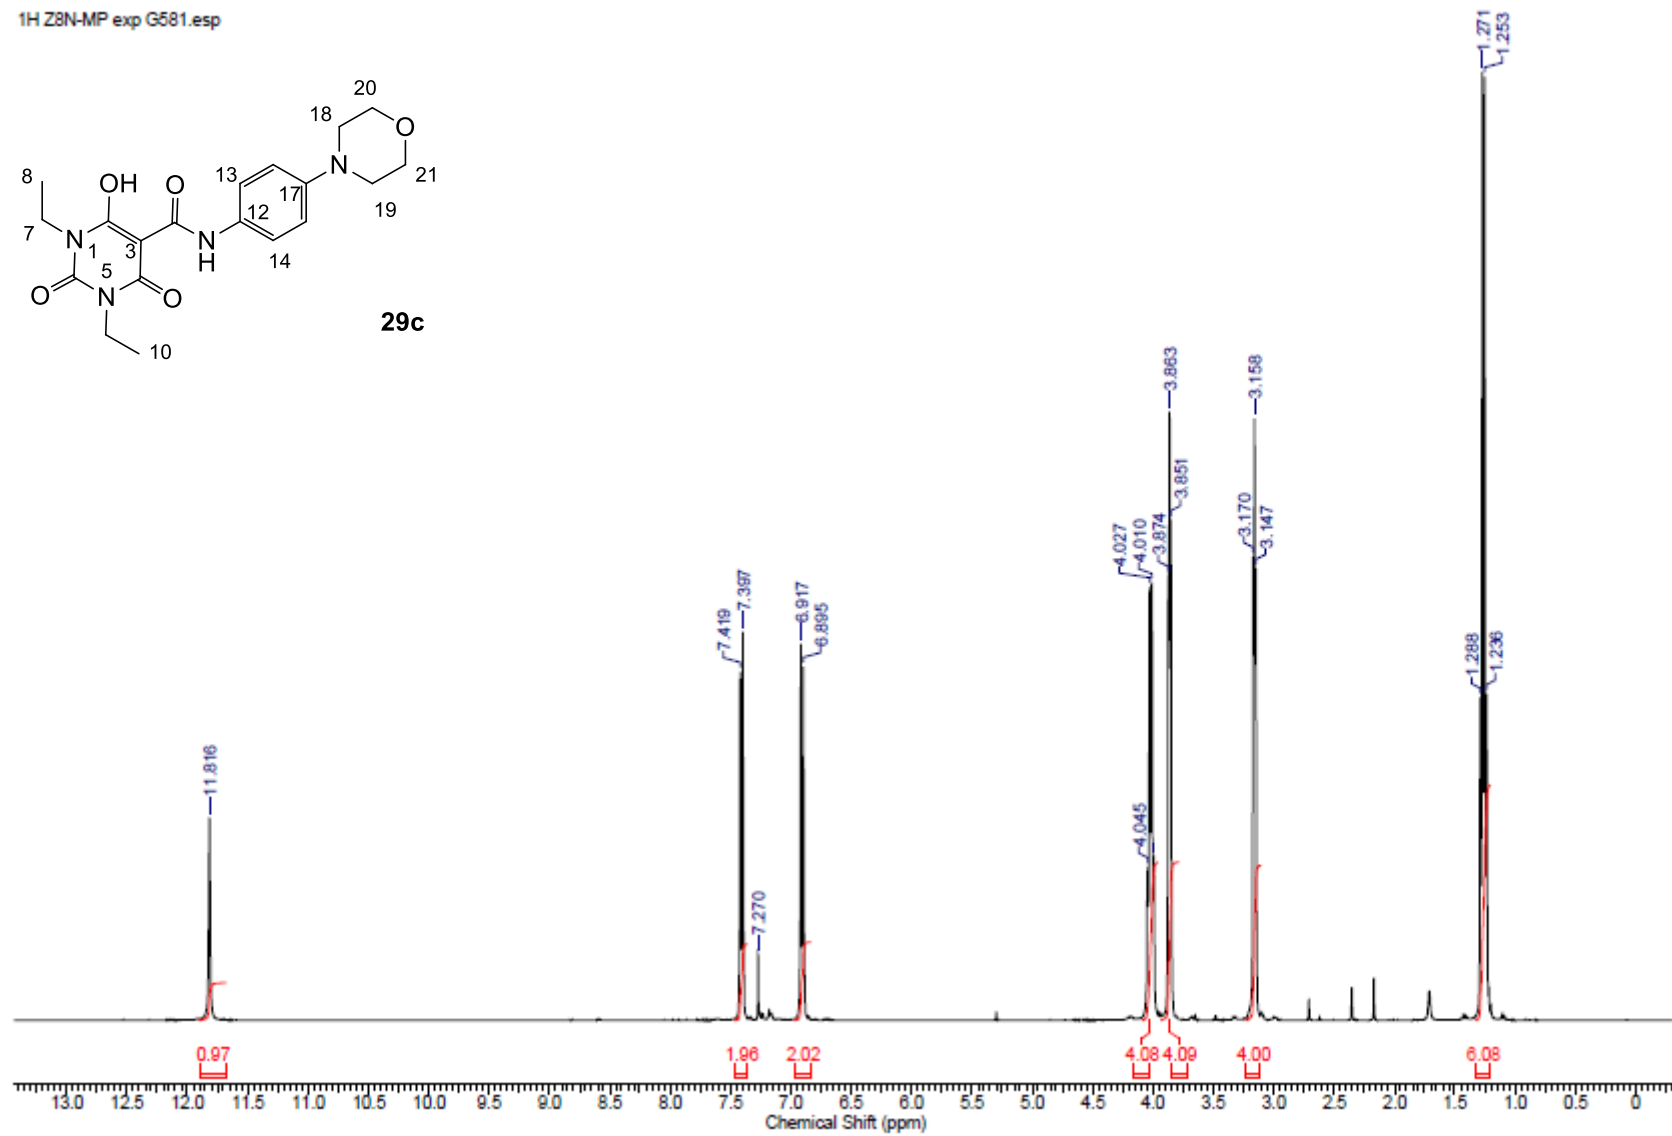

13C Z8N-MP exp G581.esp

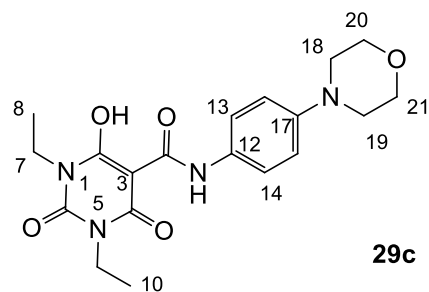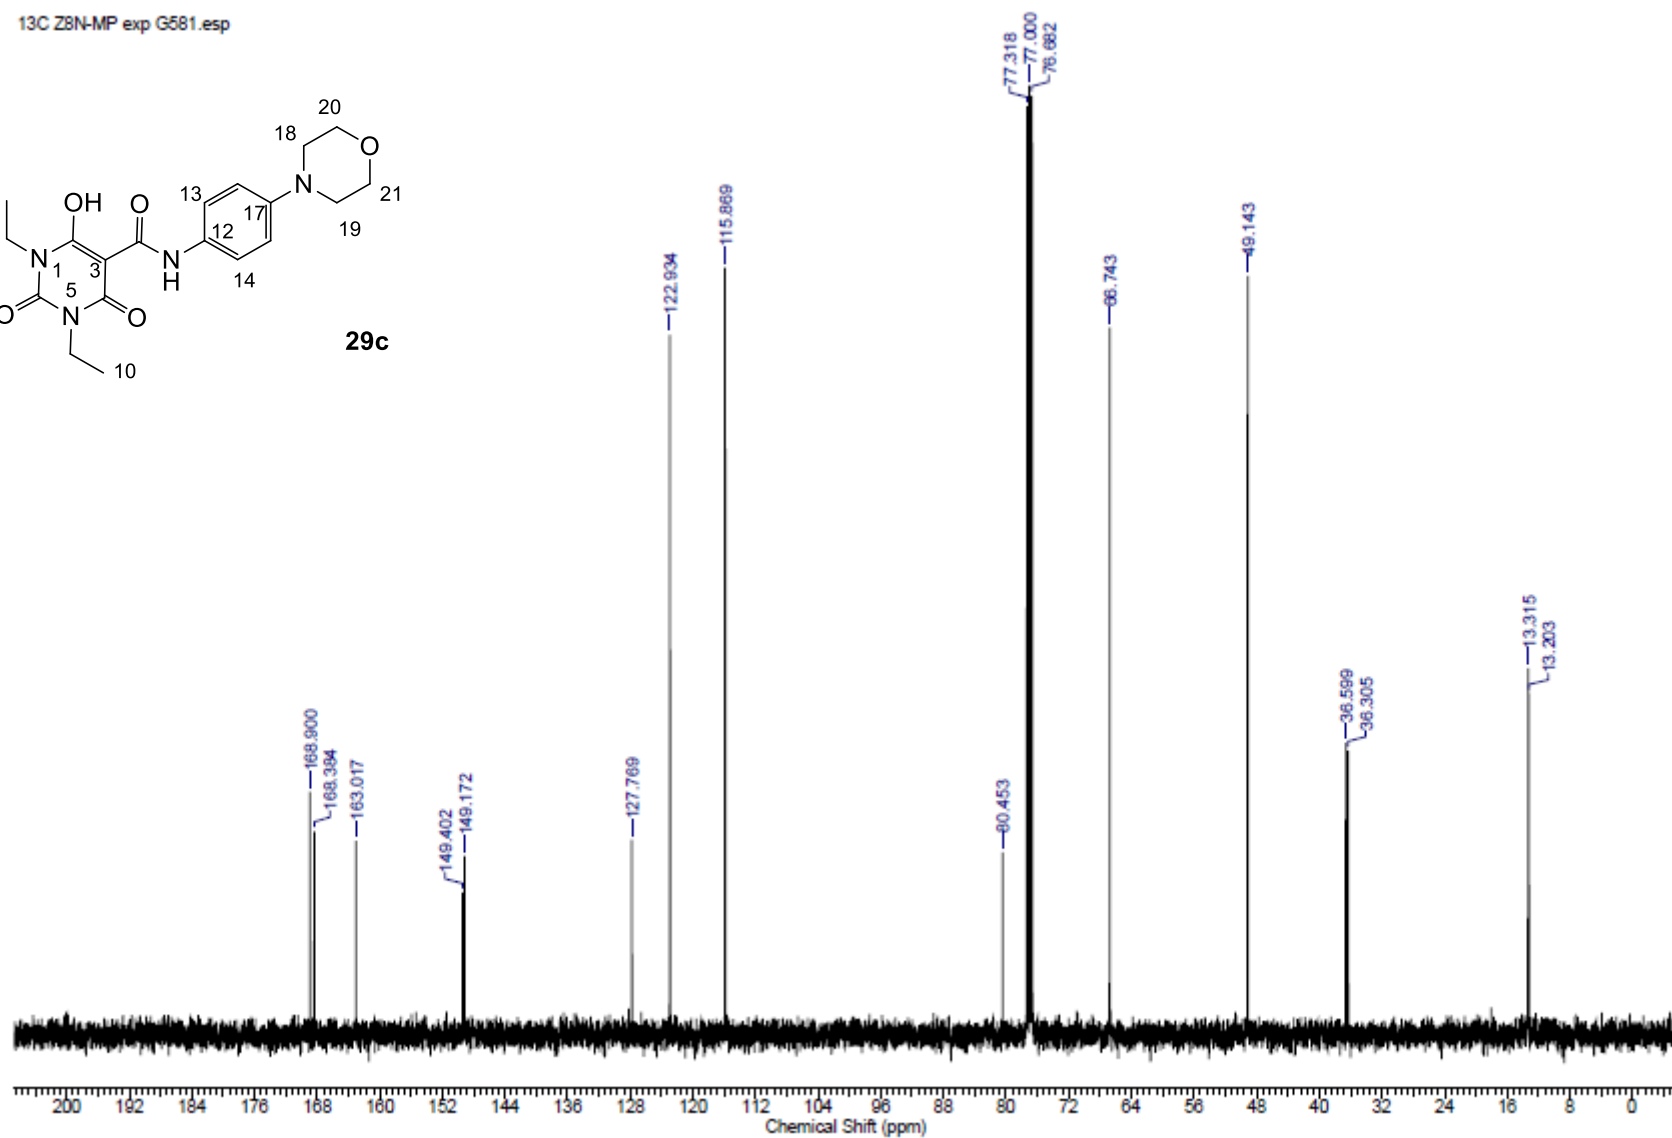

1H Z9N-IN exp G583.esp

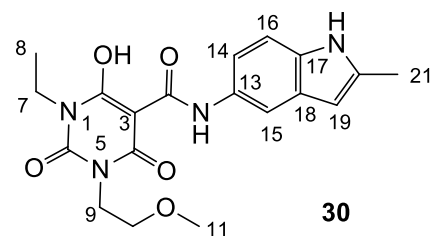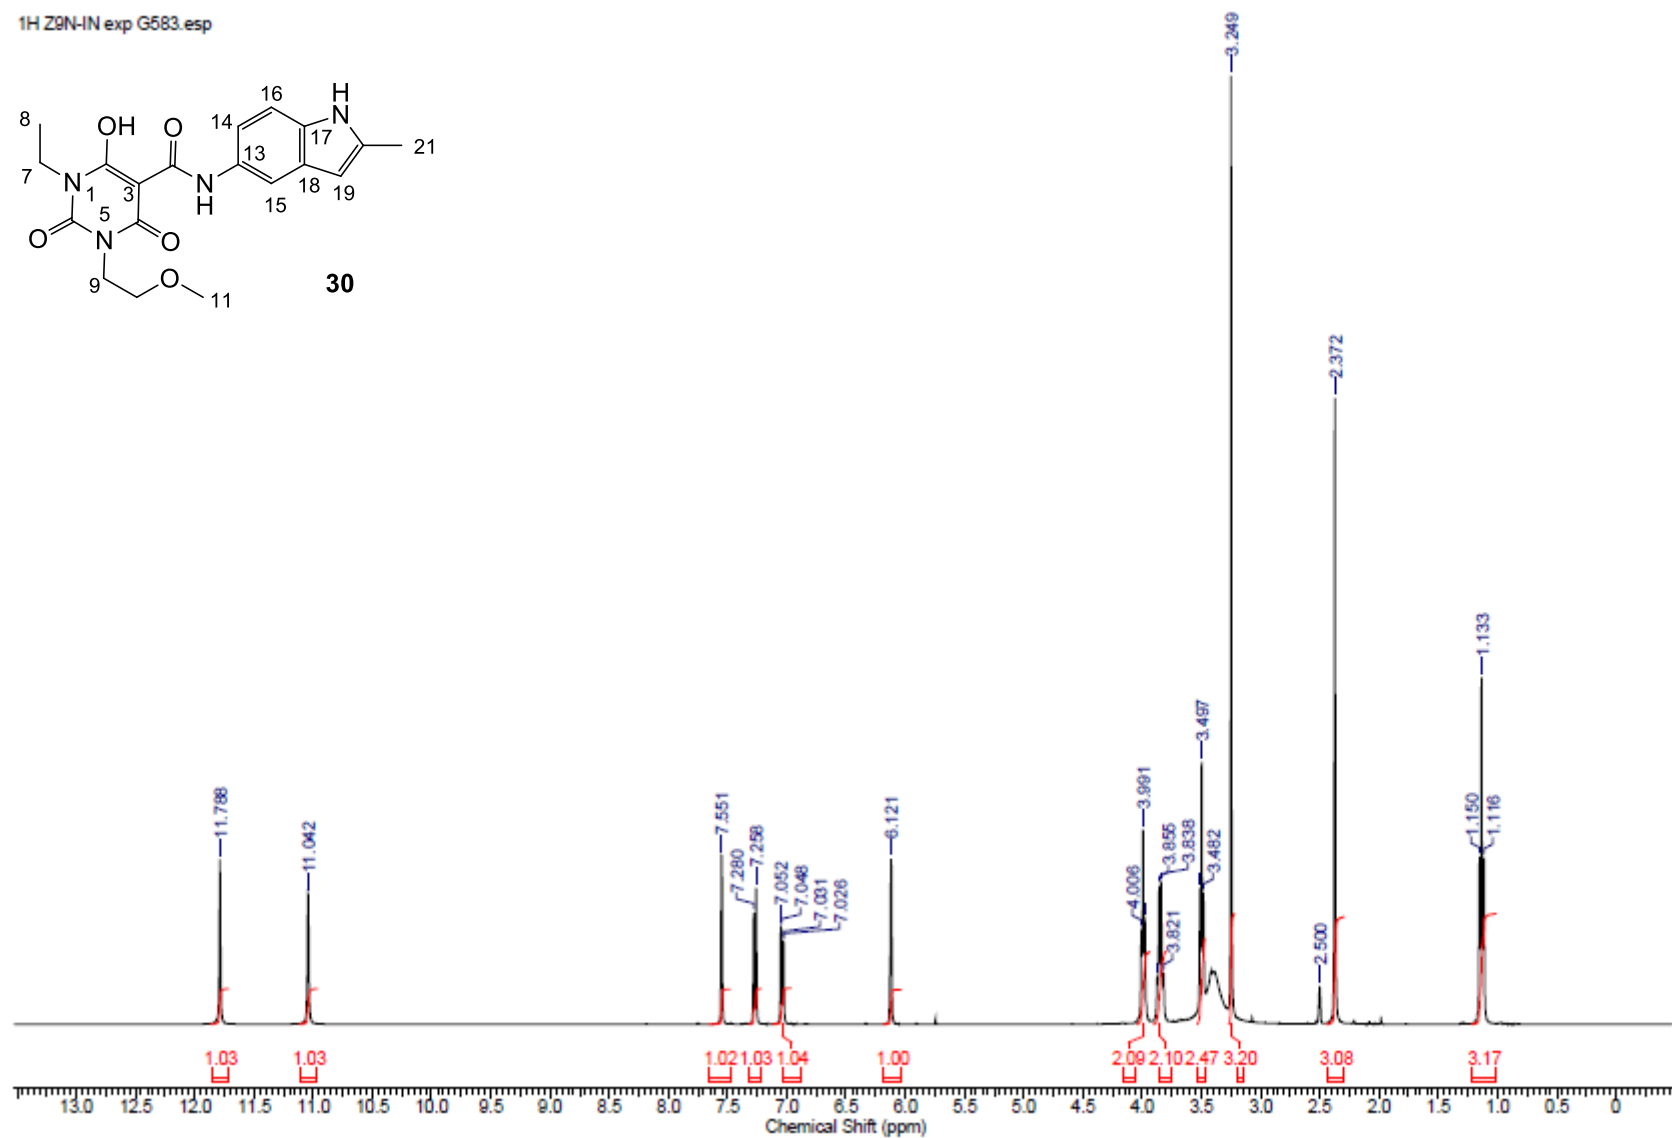

13c Z9N-IN exp G583.esp

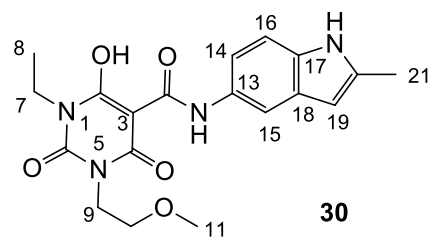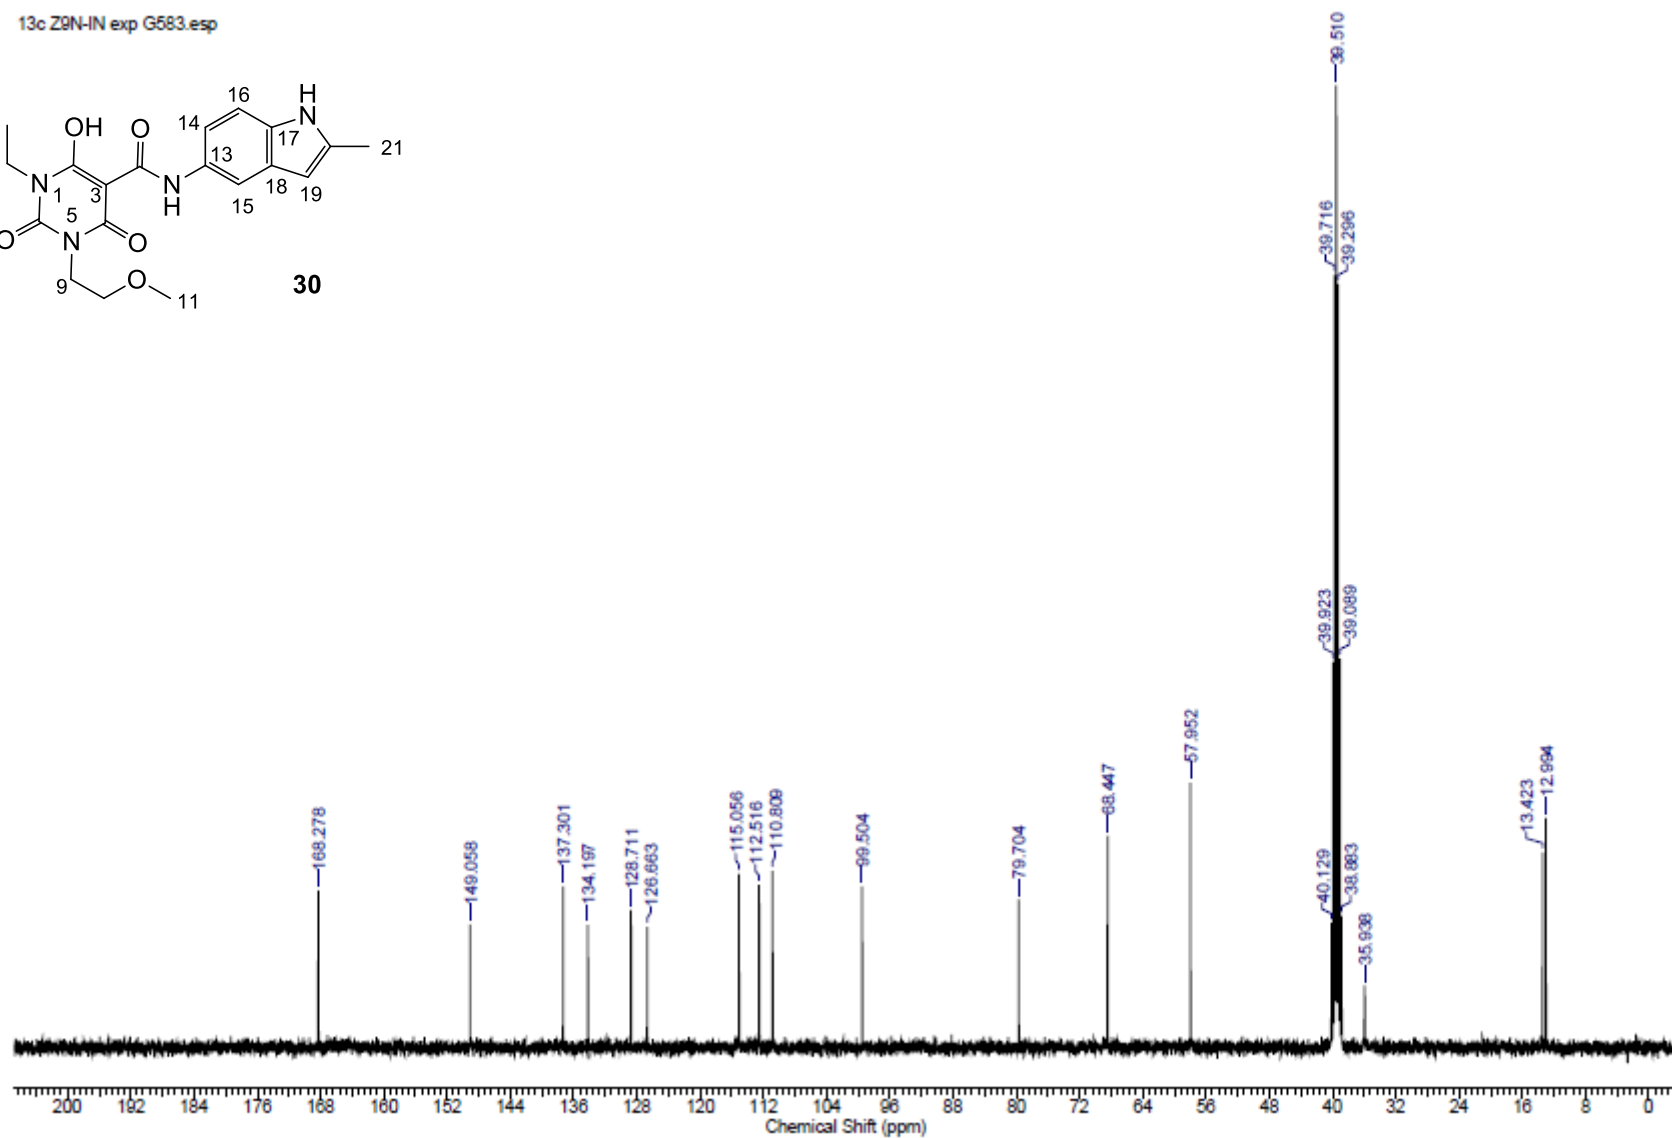



1H Z8N-TMB exp G574.esp

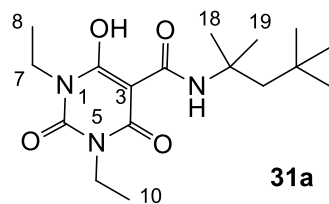

31a

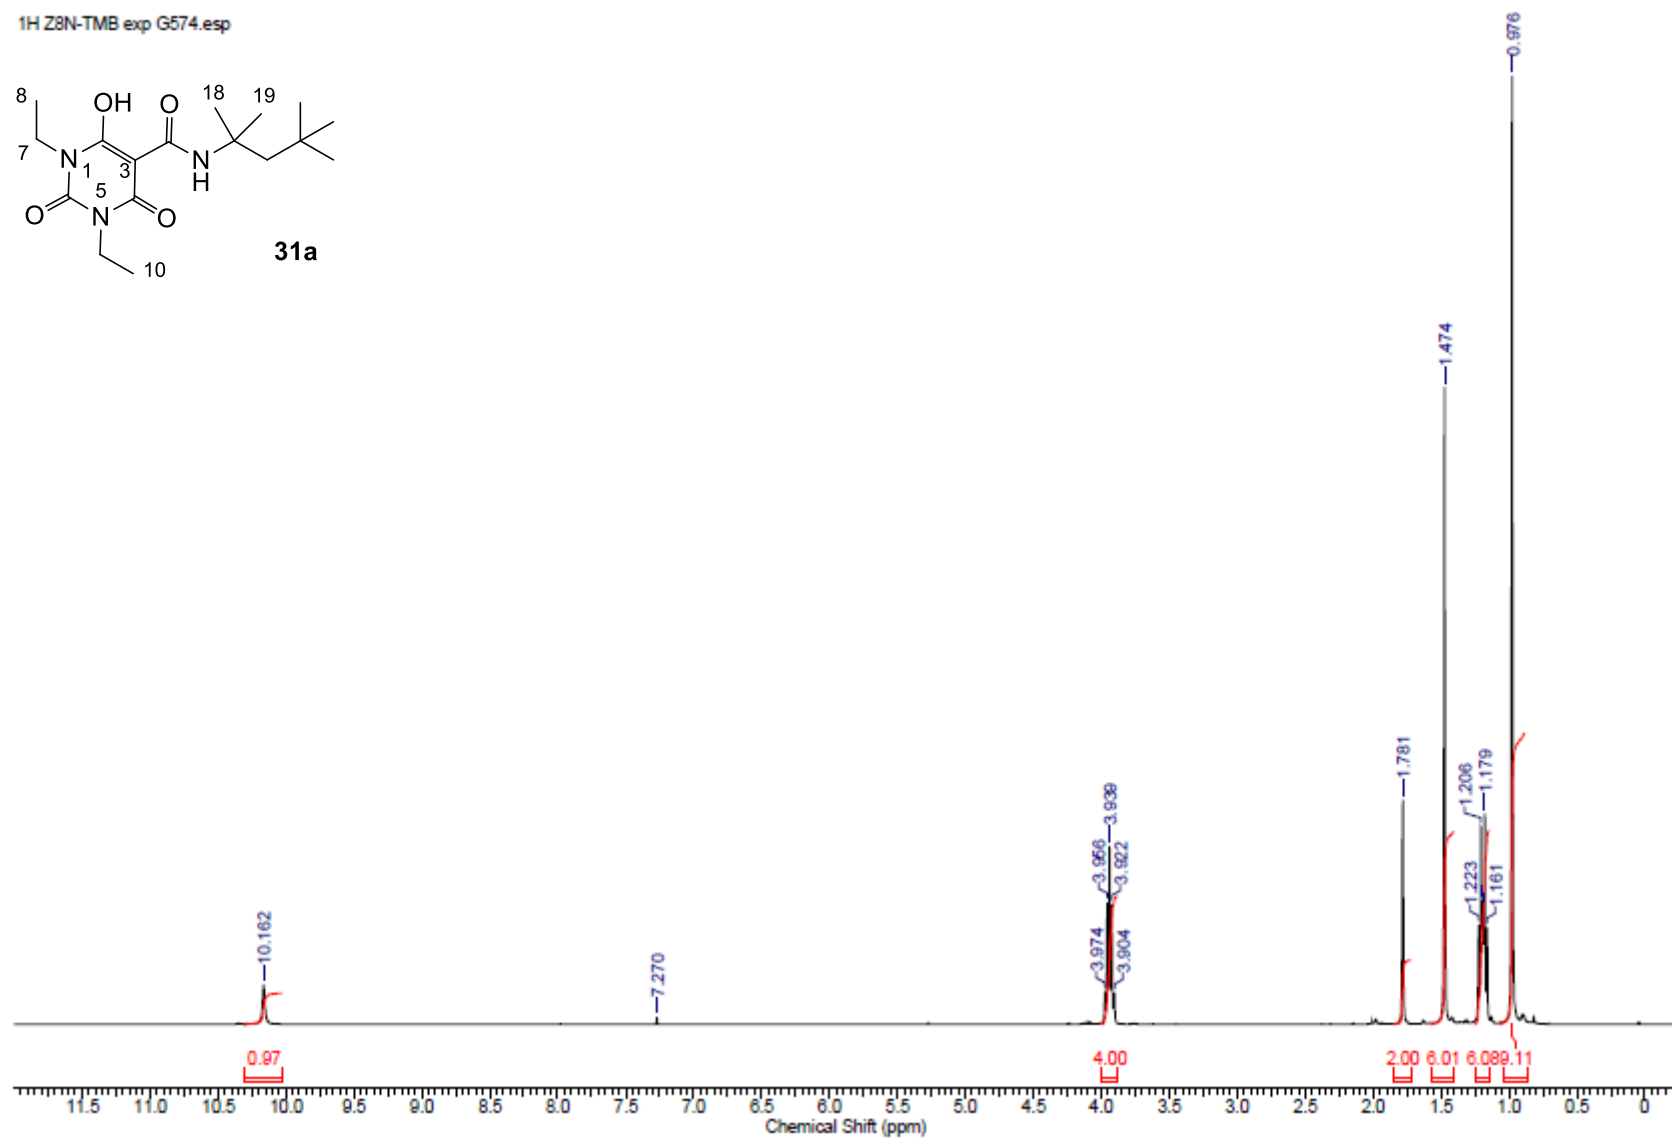



1H Z9N-TMB exp G584.esp

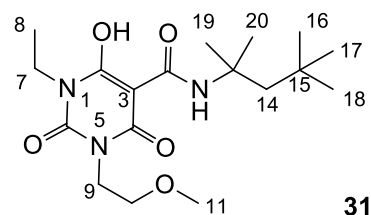

**31b**

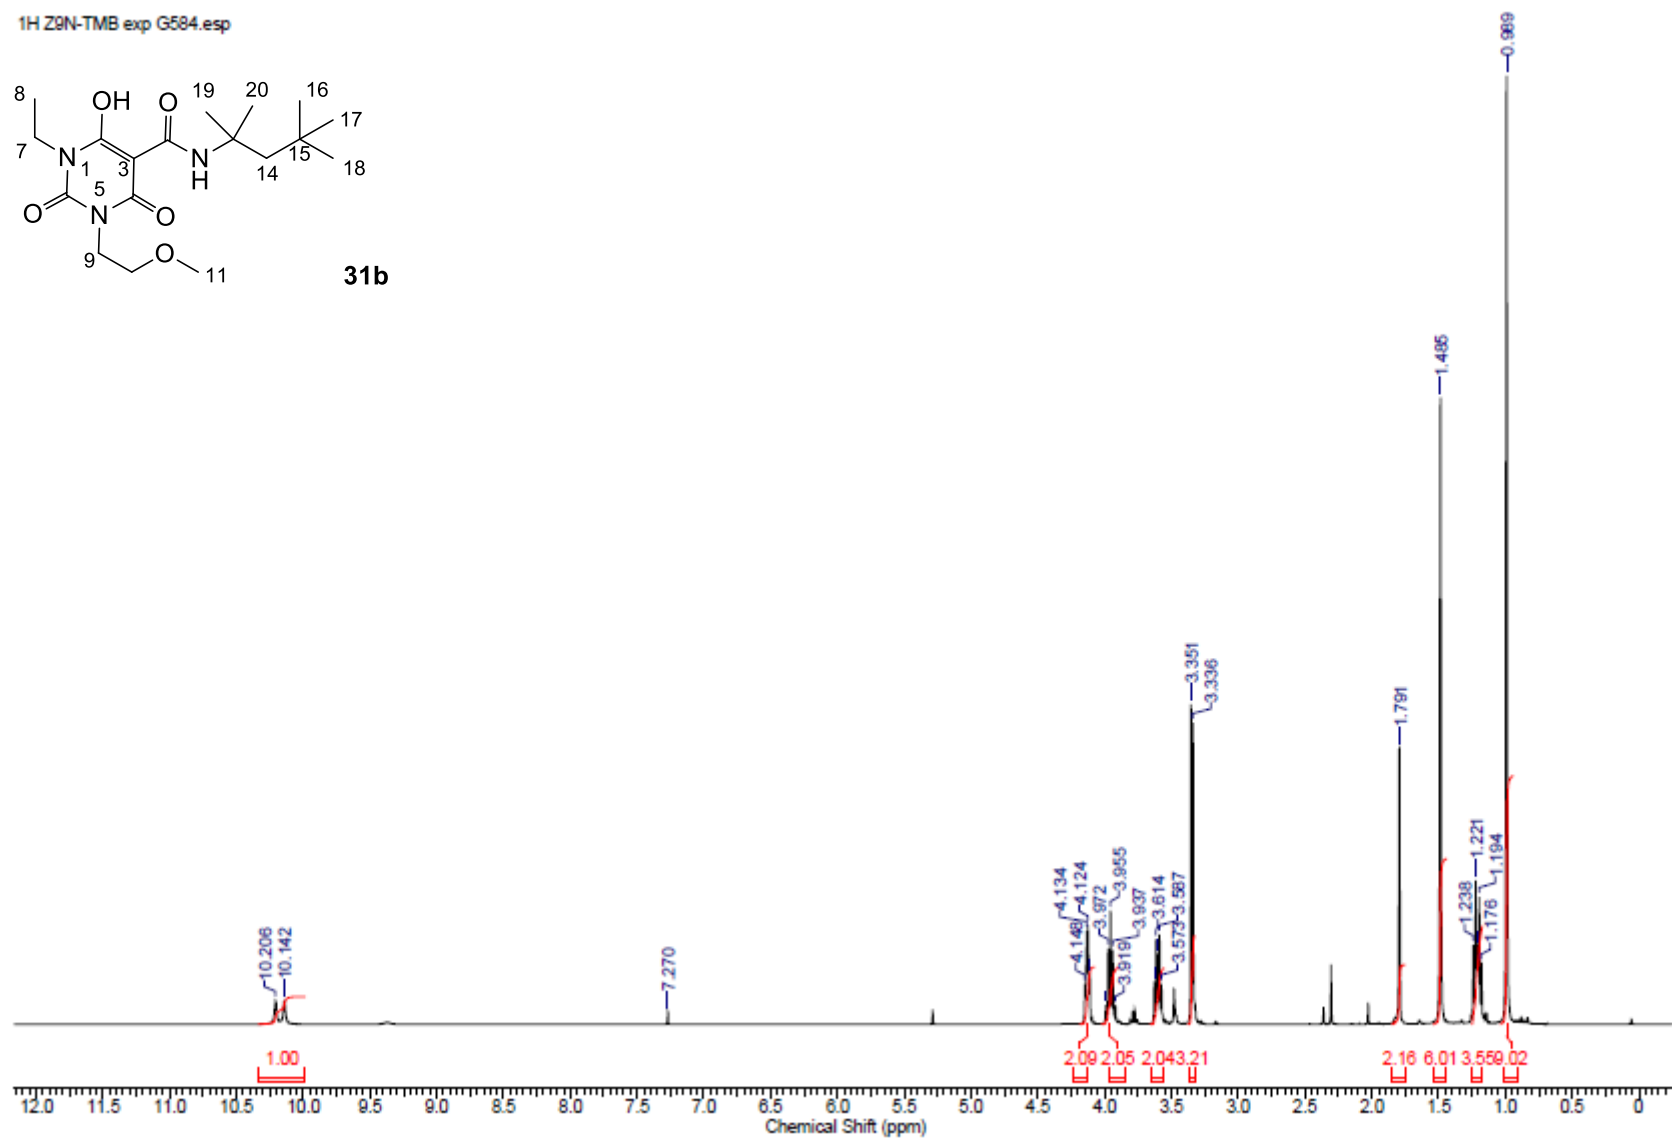



1H Z3N-C1AD exp G532 500.esp

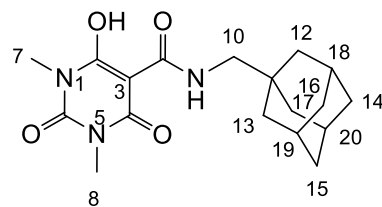

32

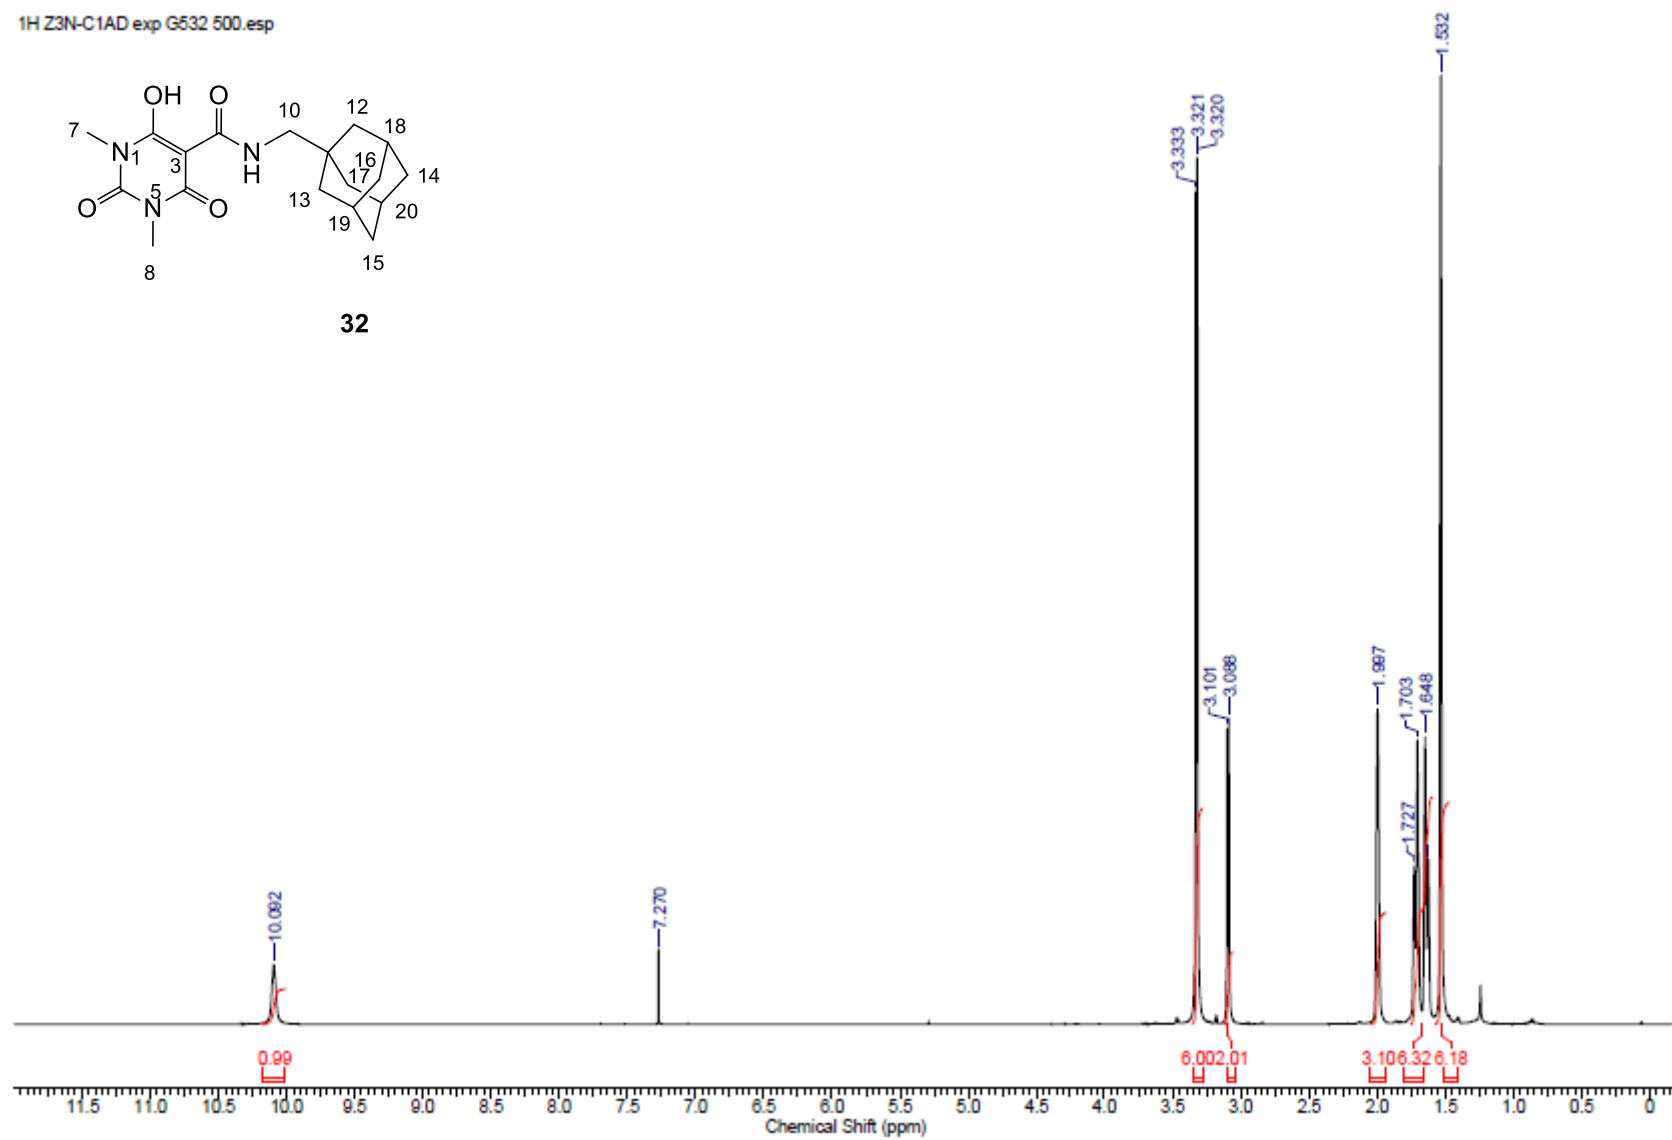

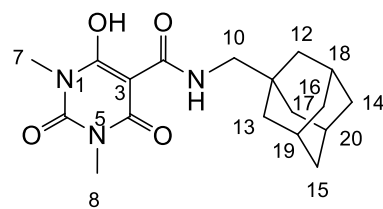

**32**

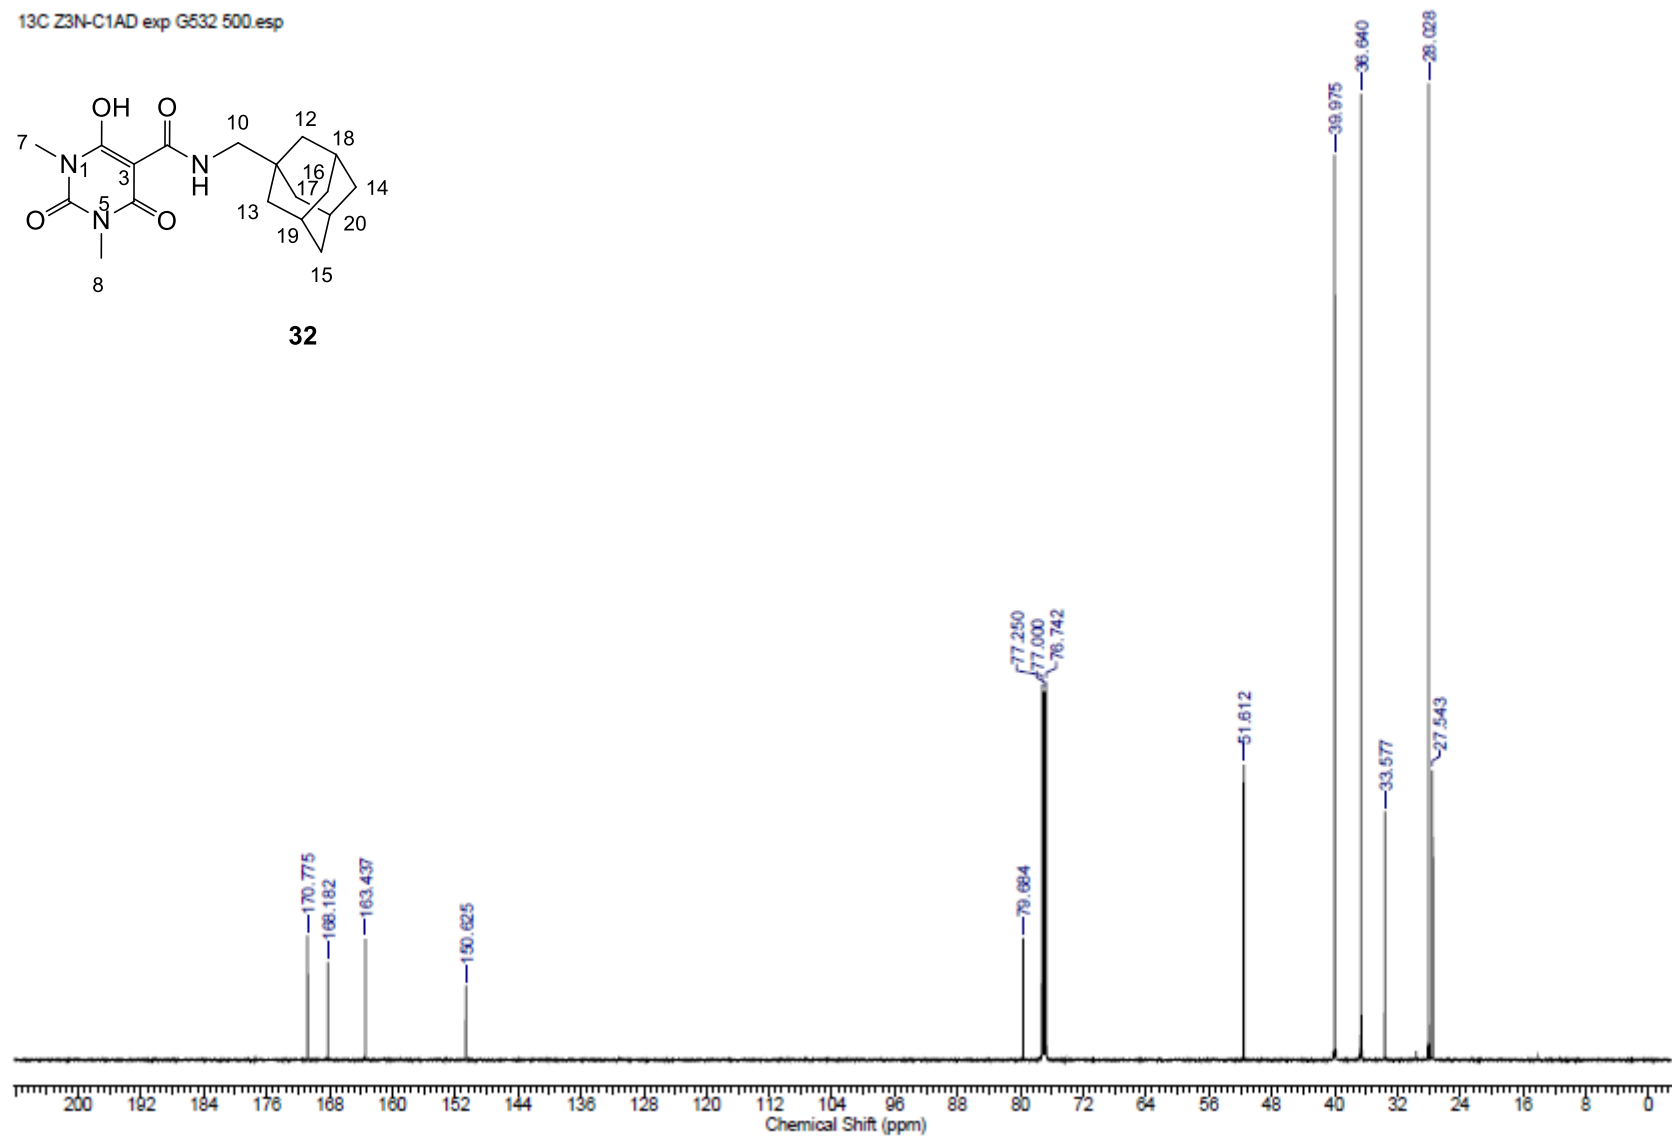

HMBC Z3N-C1AD exp G532 500.exp

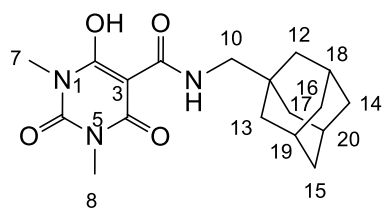

32

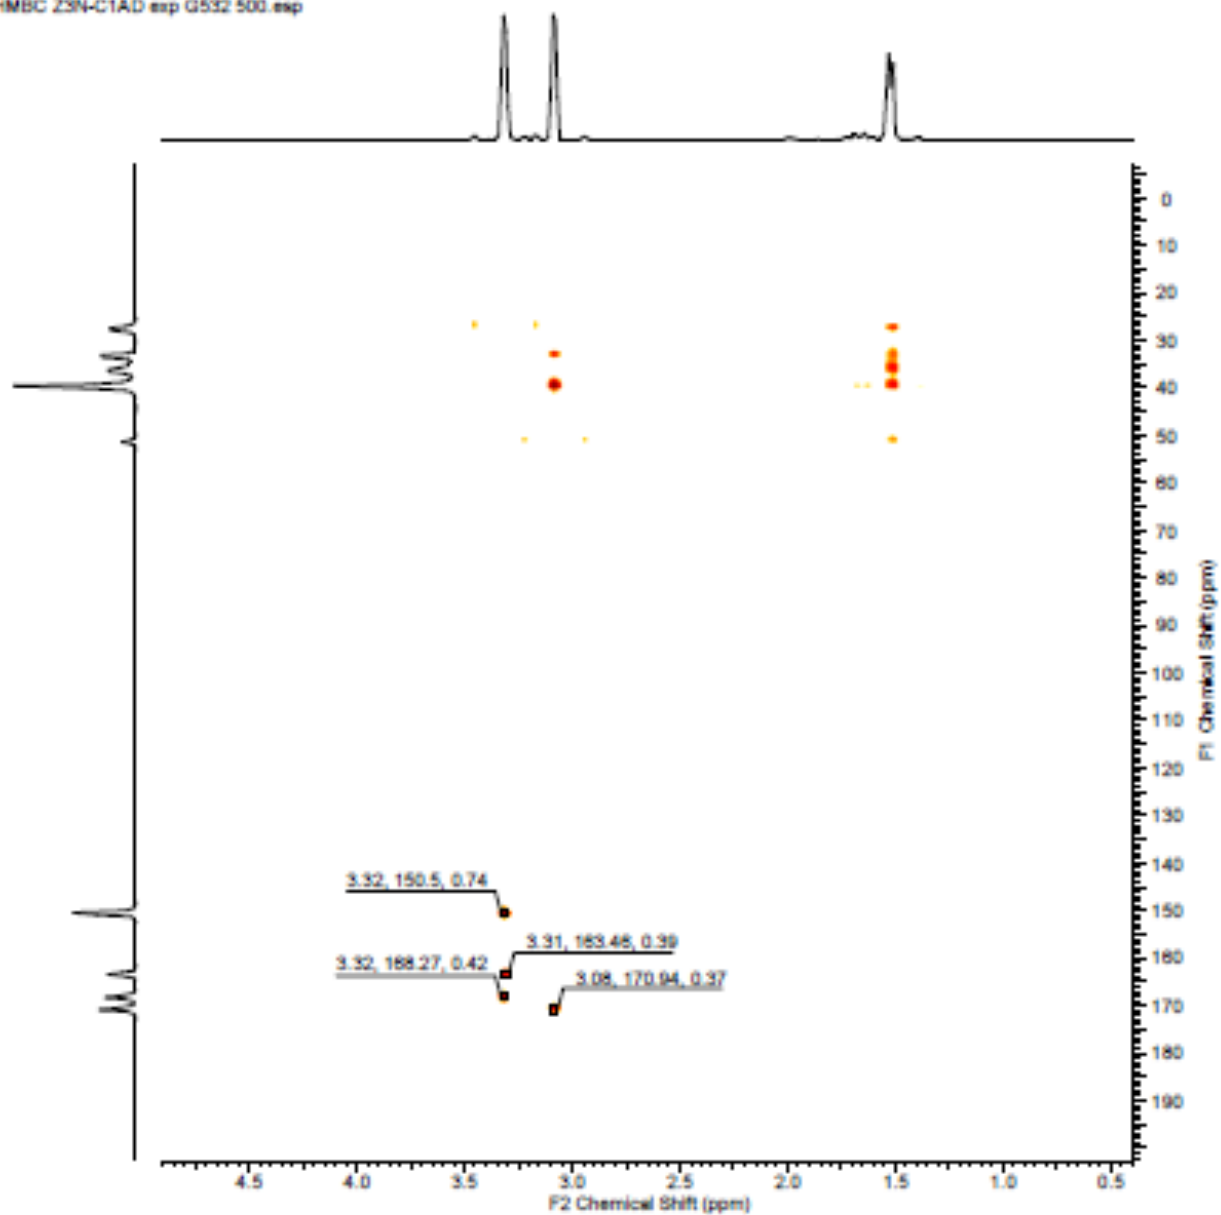

1H Z7-C1-NPE exp G498.esp

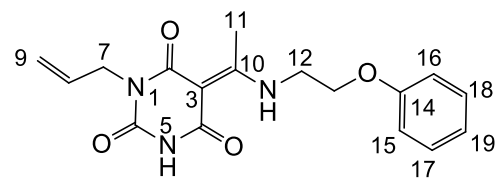

**33a**

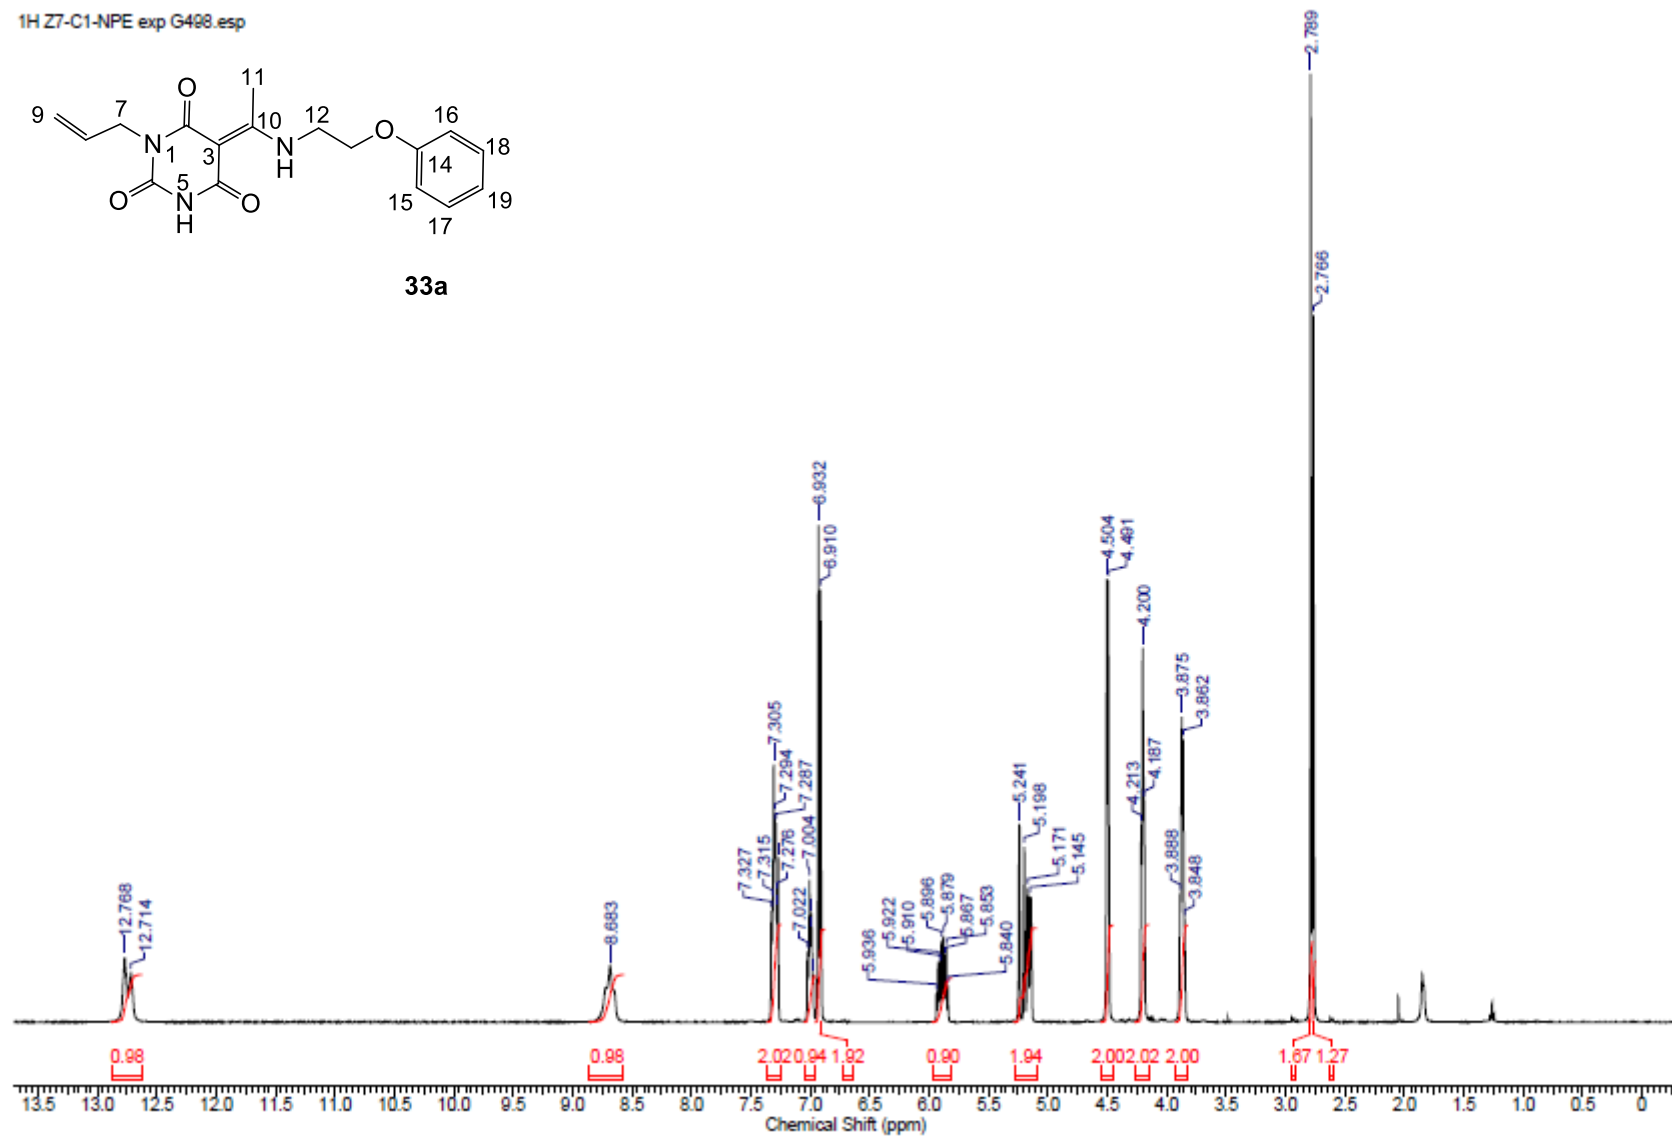



13C Z7-C1-NPE exp G498.esp

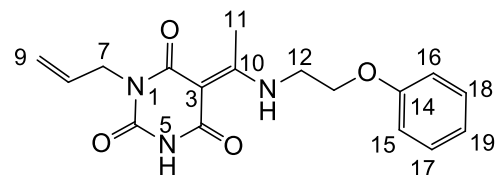

**33a**

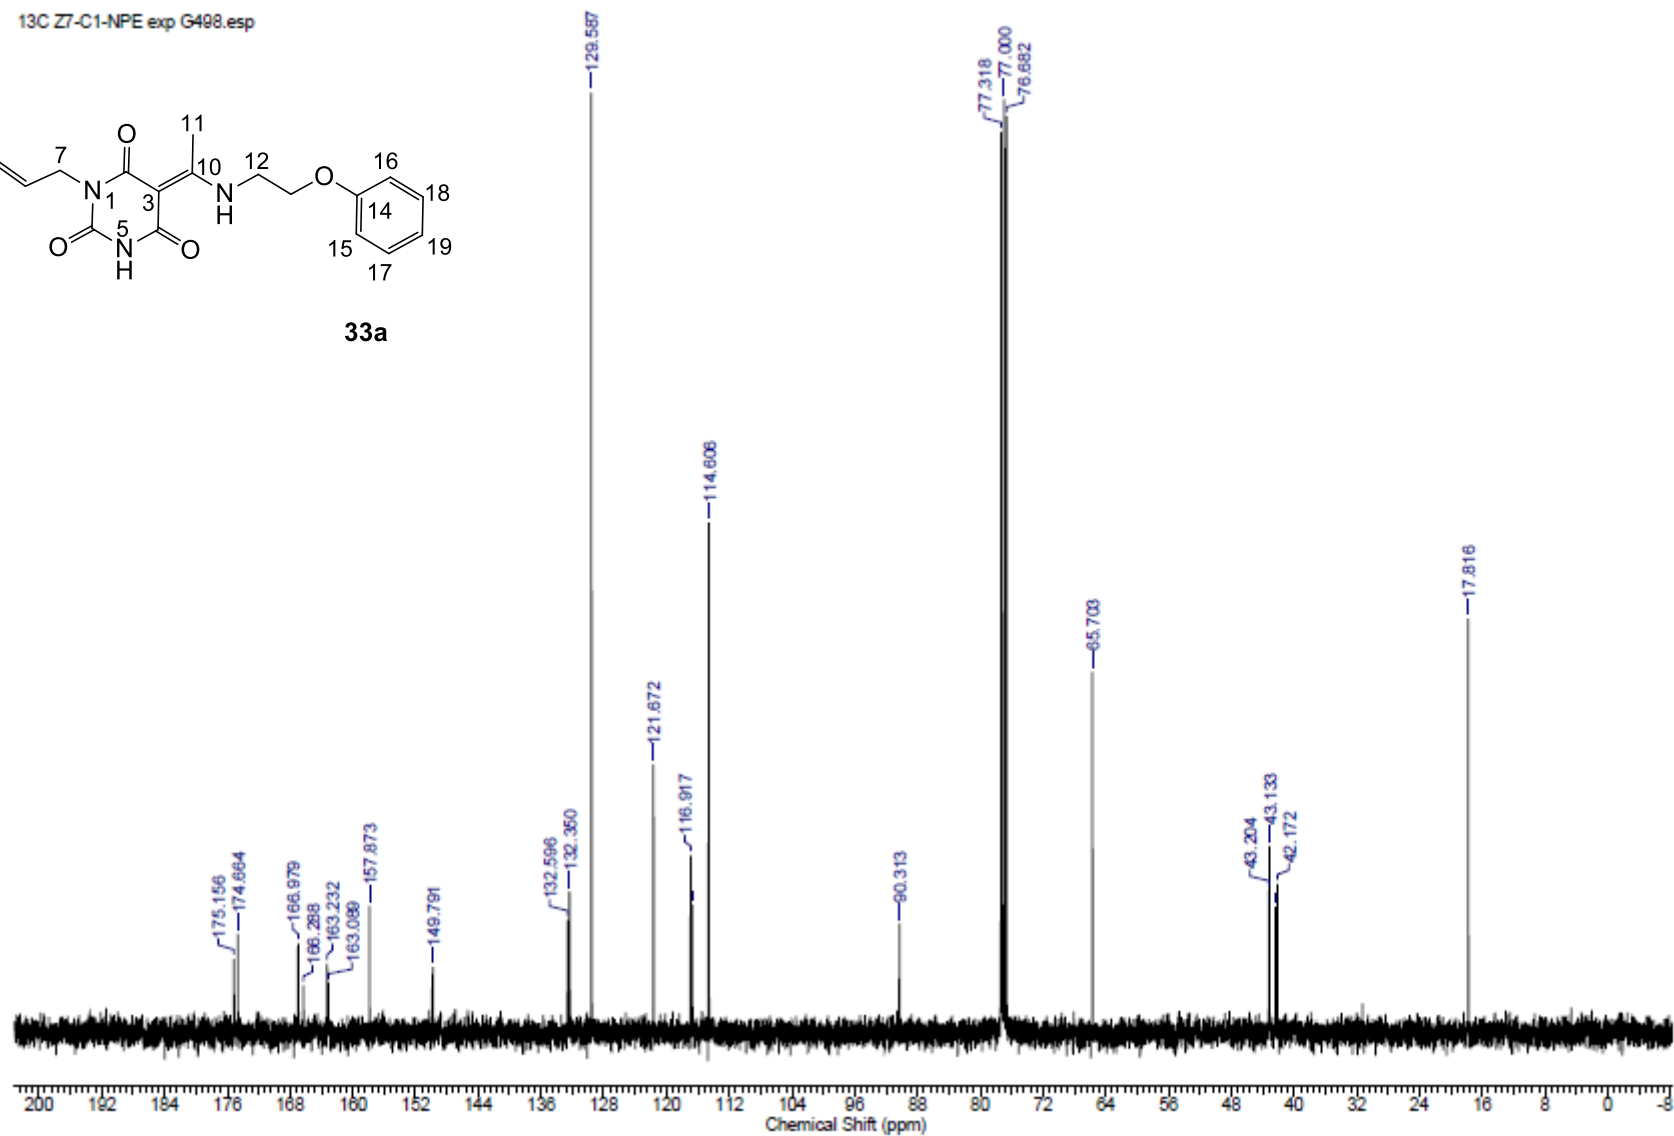

1H Z7-C1-NPE2 exp G499 500.esp

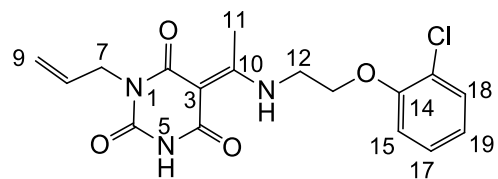

**33b**

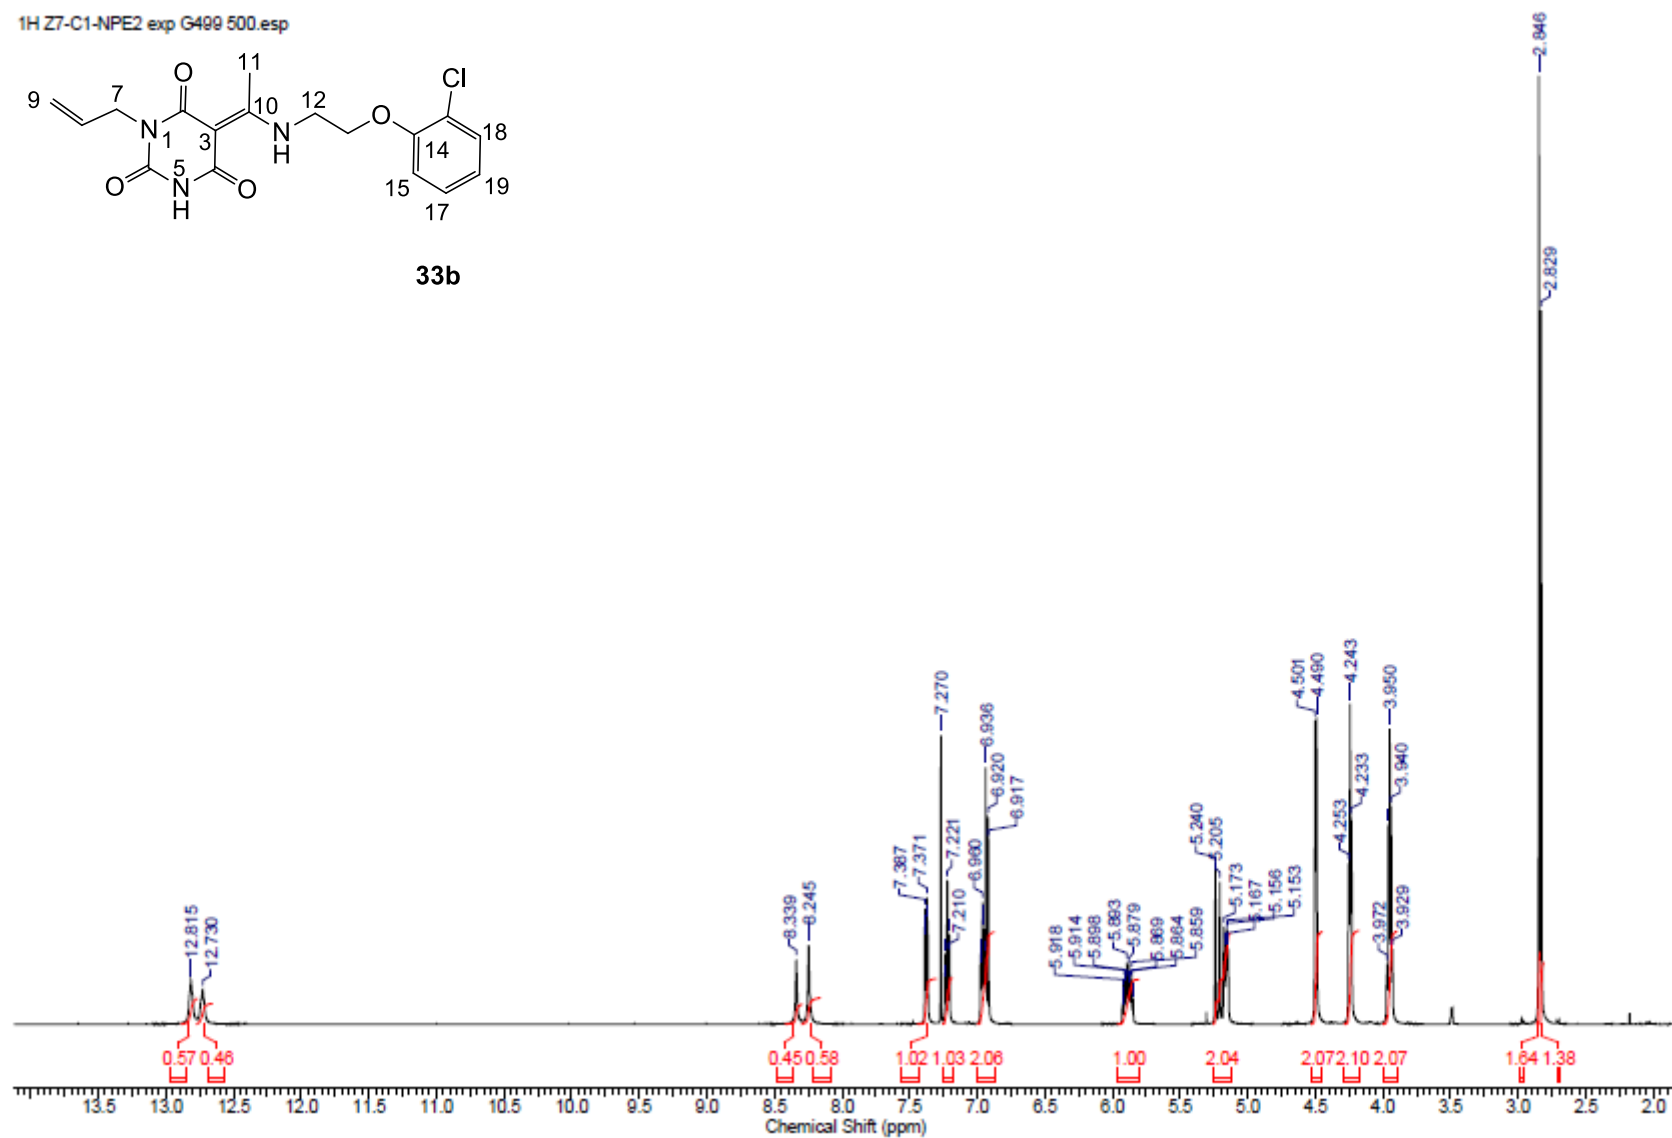

<sup>13</sup>C 500 .esp

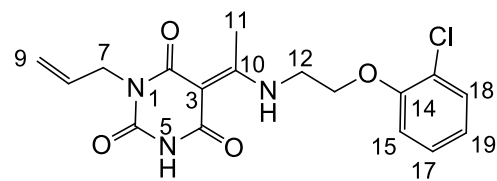

**33b**

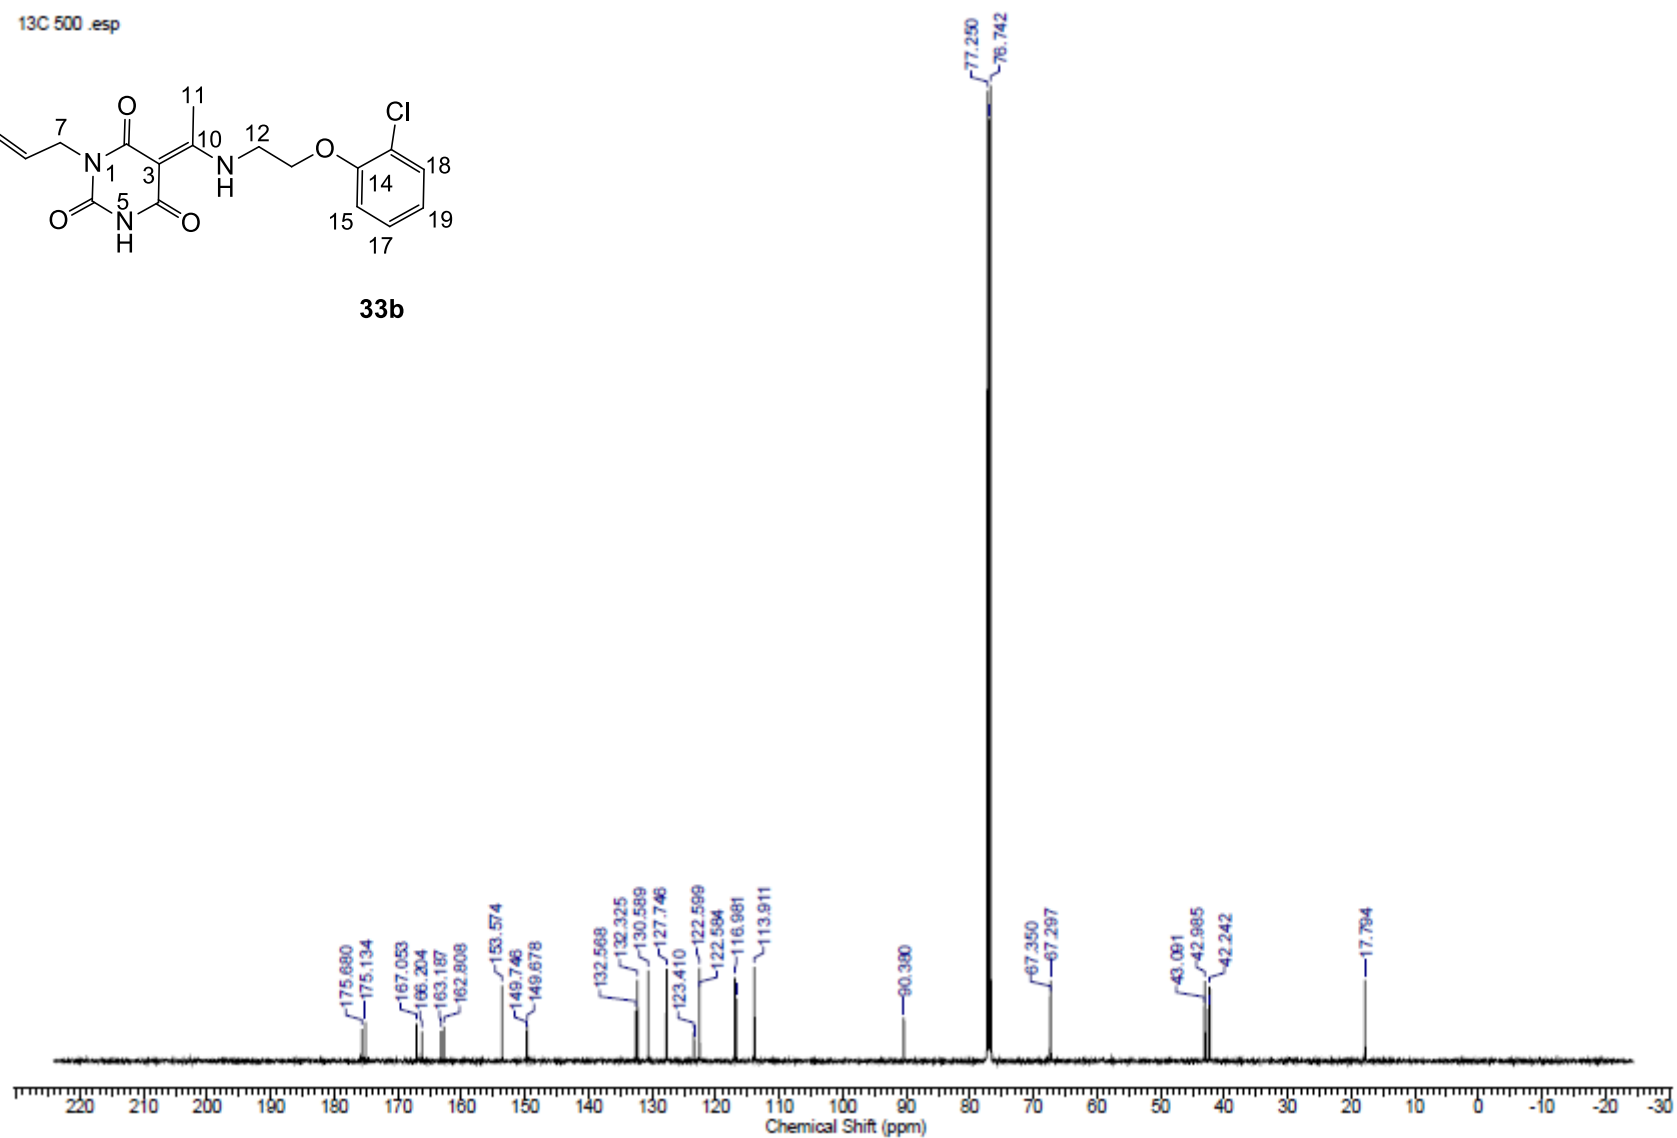

HMBC 2D-Cl-APEZ exp 0438 502.exp

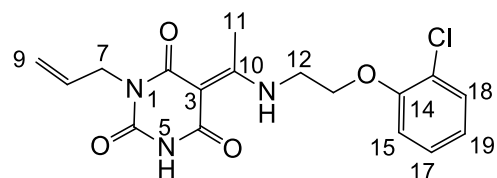

33b

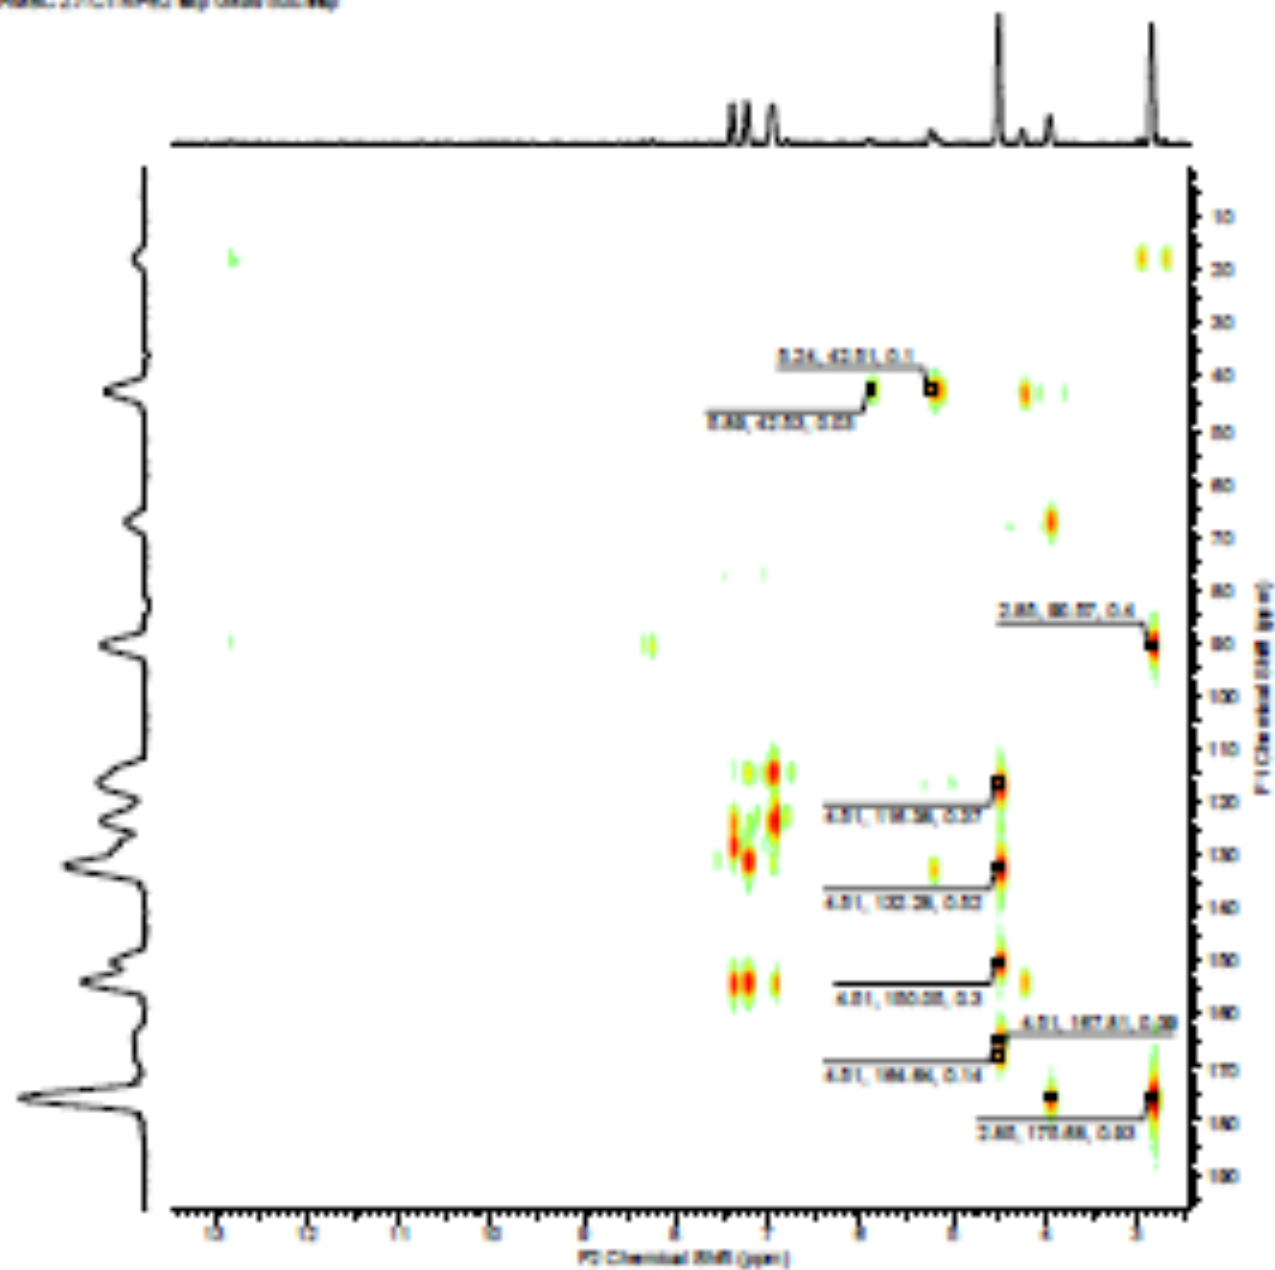

1H Z3-C1-NPE exp G472.esp

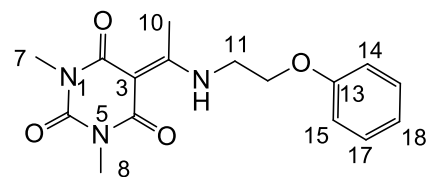

**34**

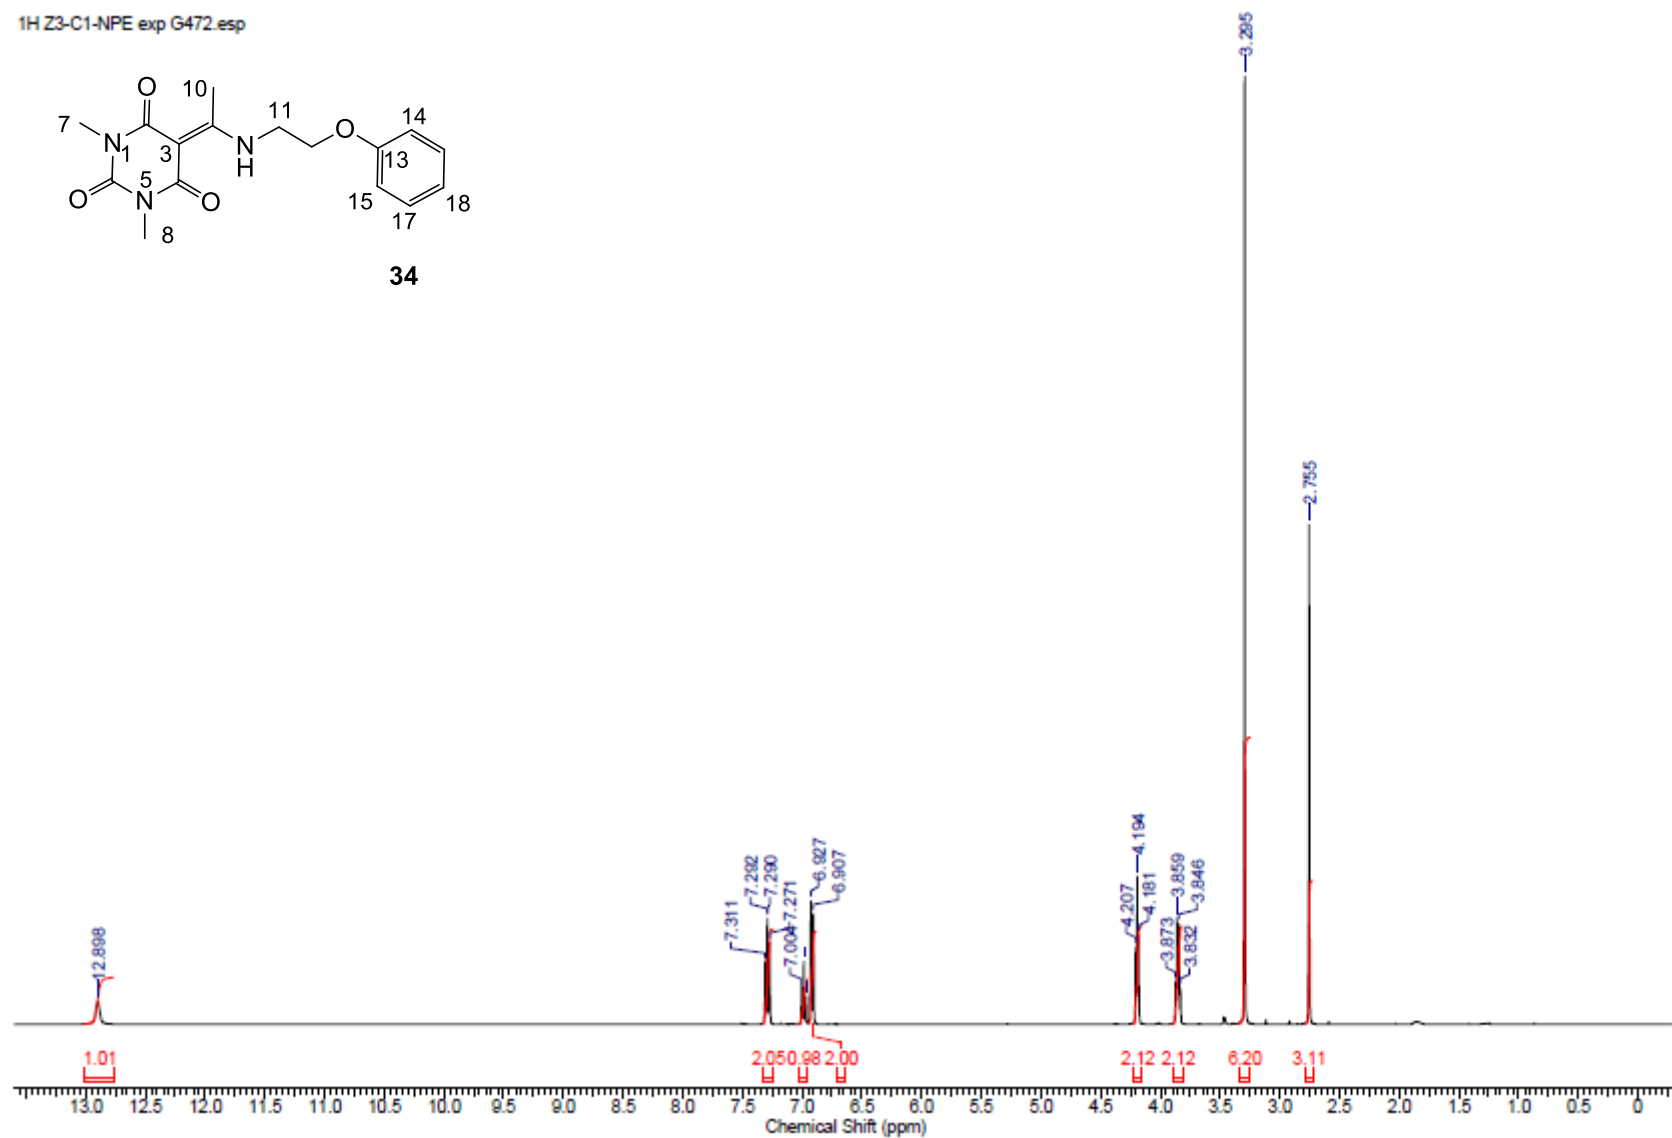

13C Z3-C1-NPE exp G472.esp

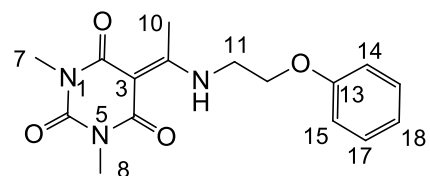

34

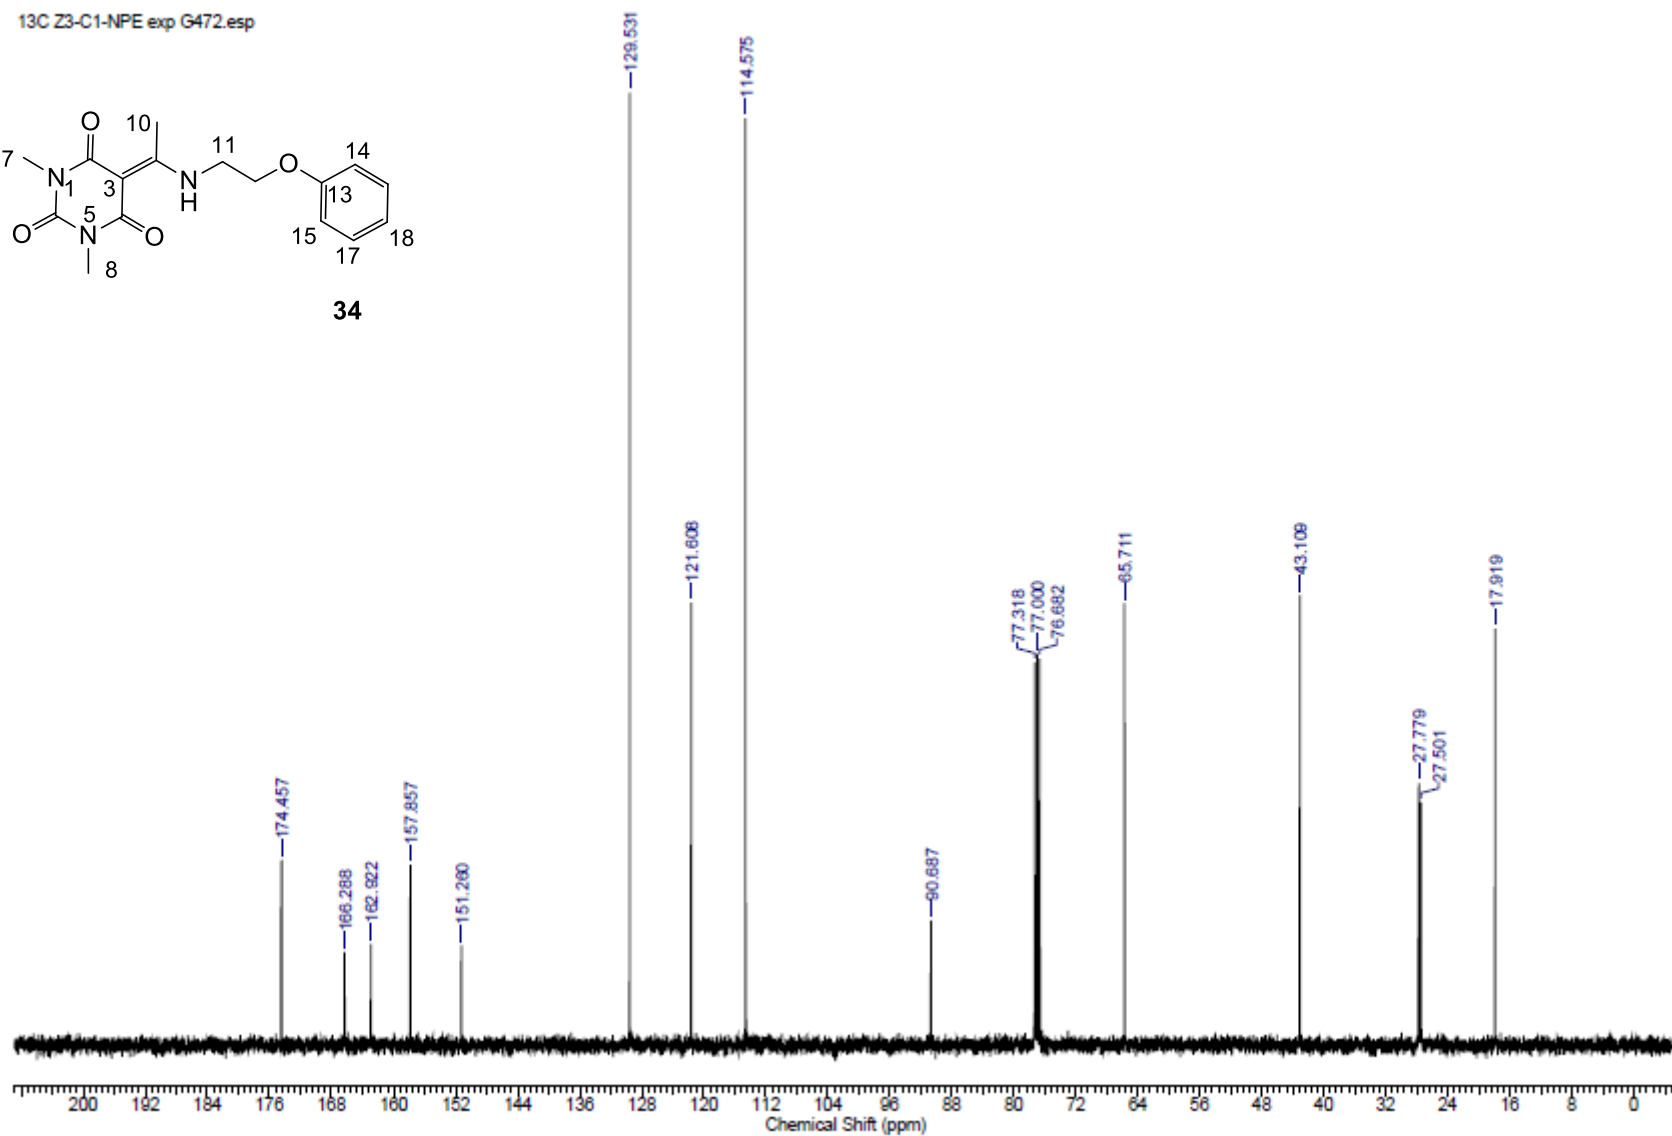

1H Z8-C1-MP exp G537.esp

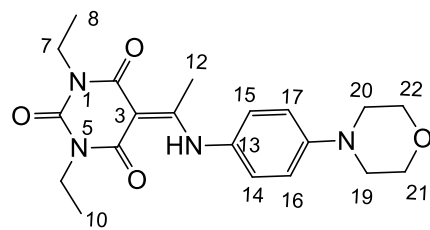

35

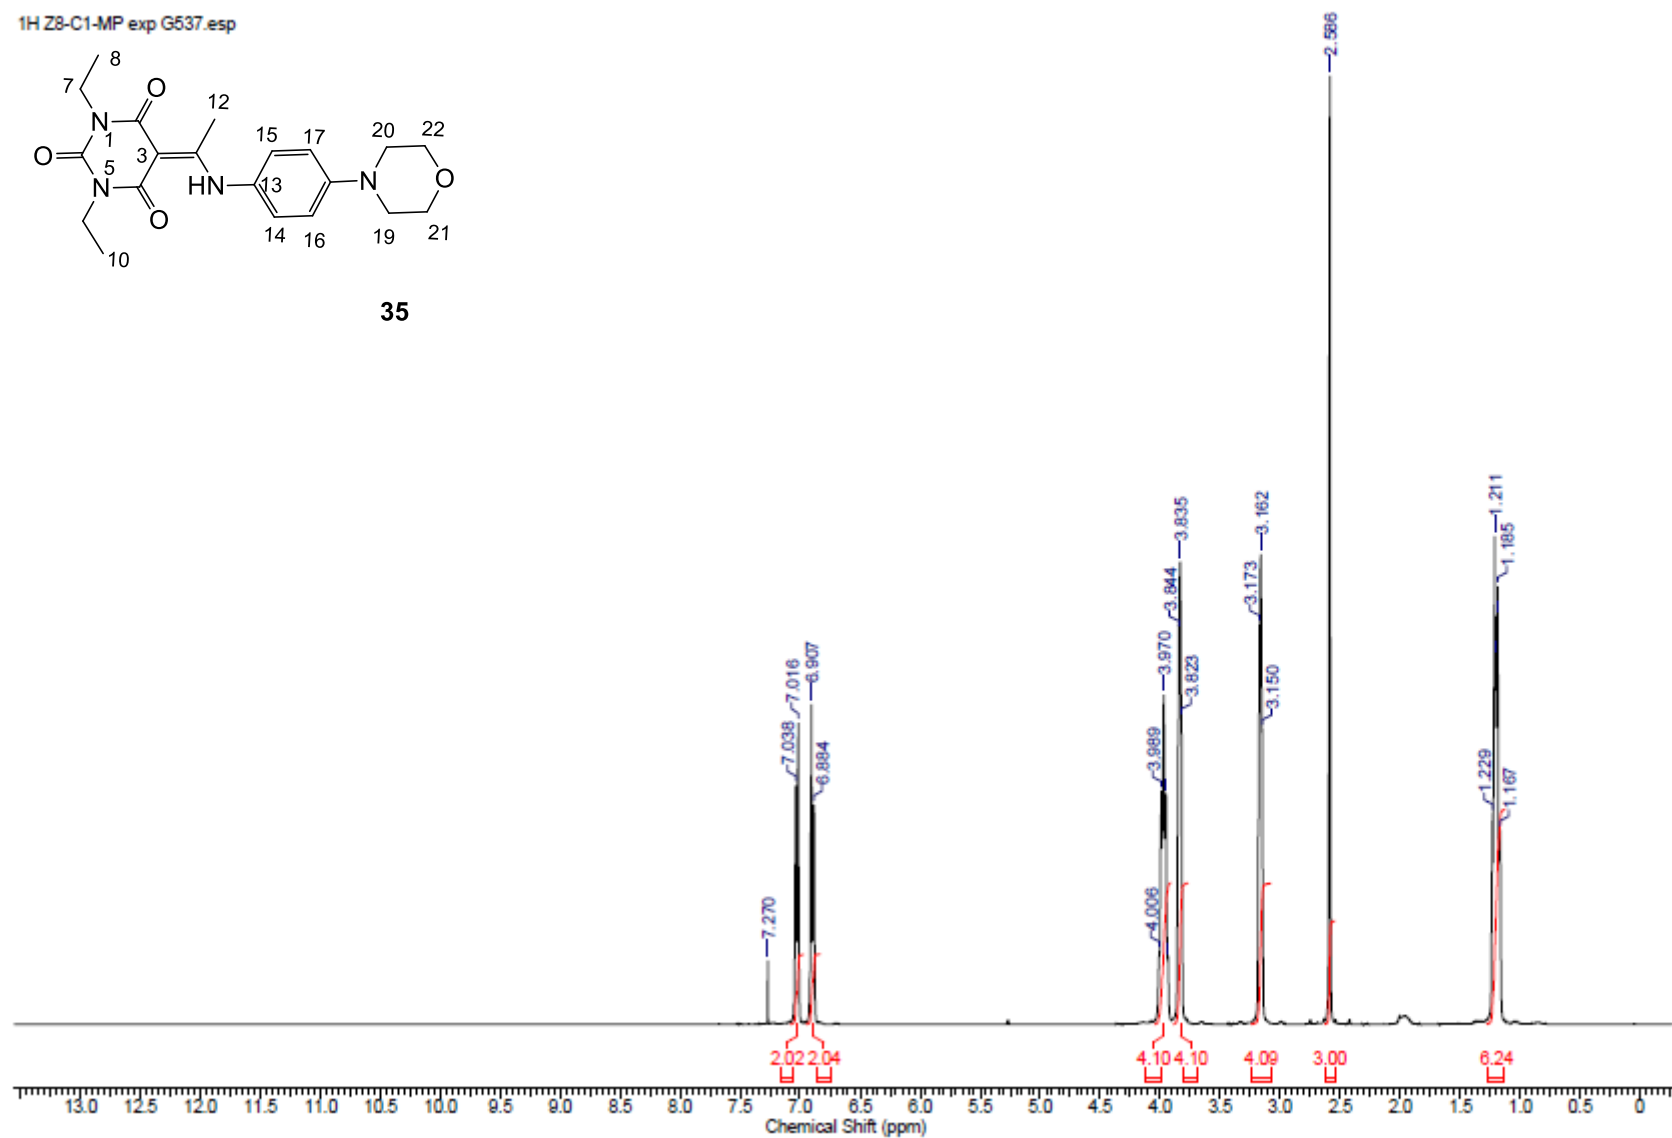

13C Z8-C1-MP exp G537.esp

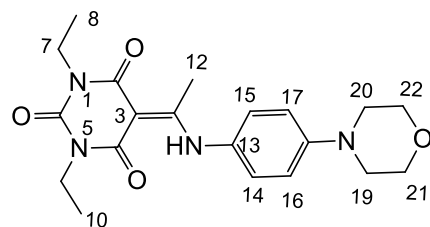

35

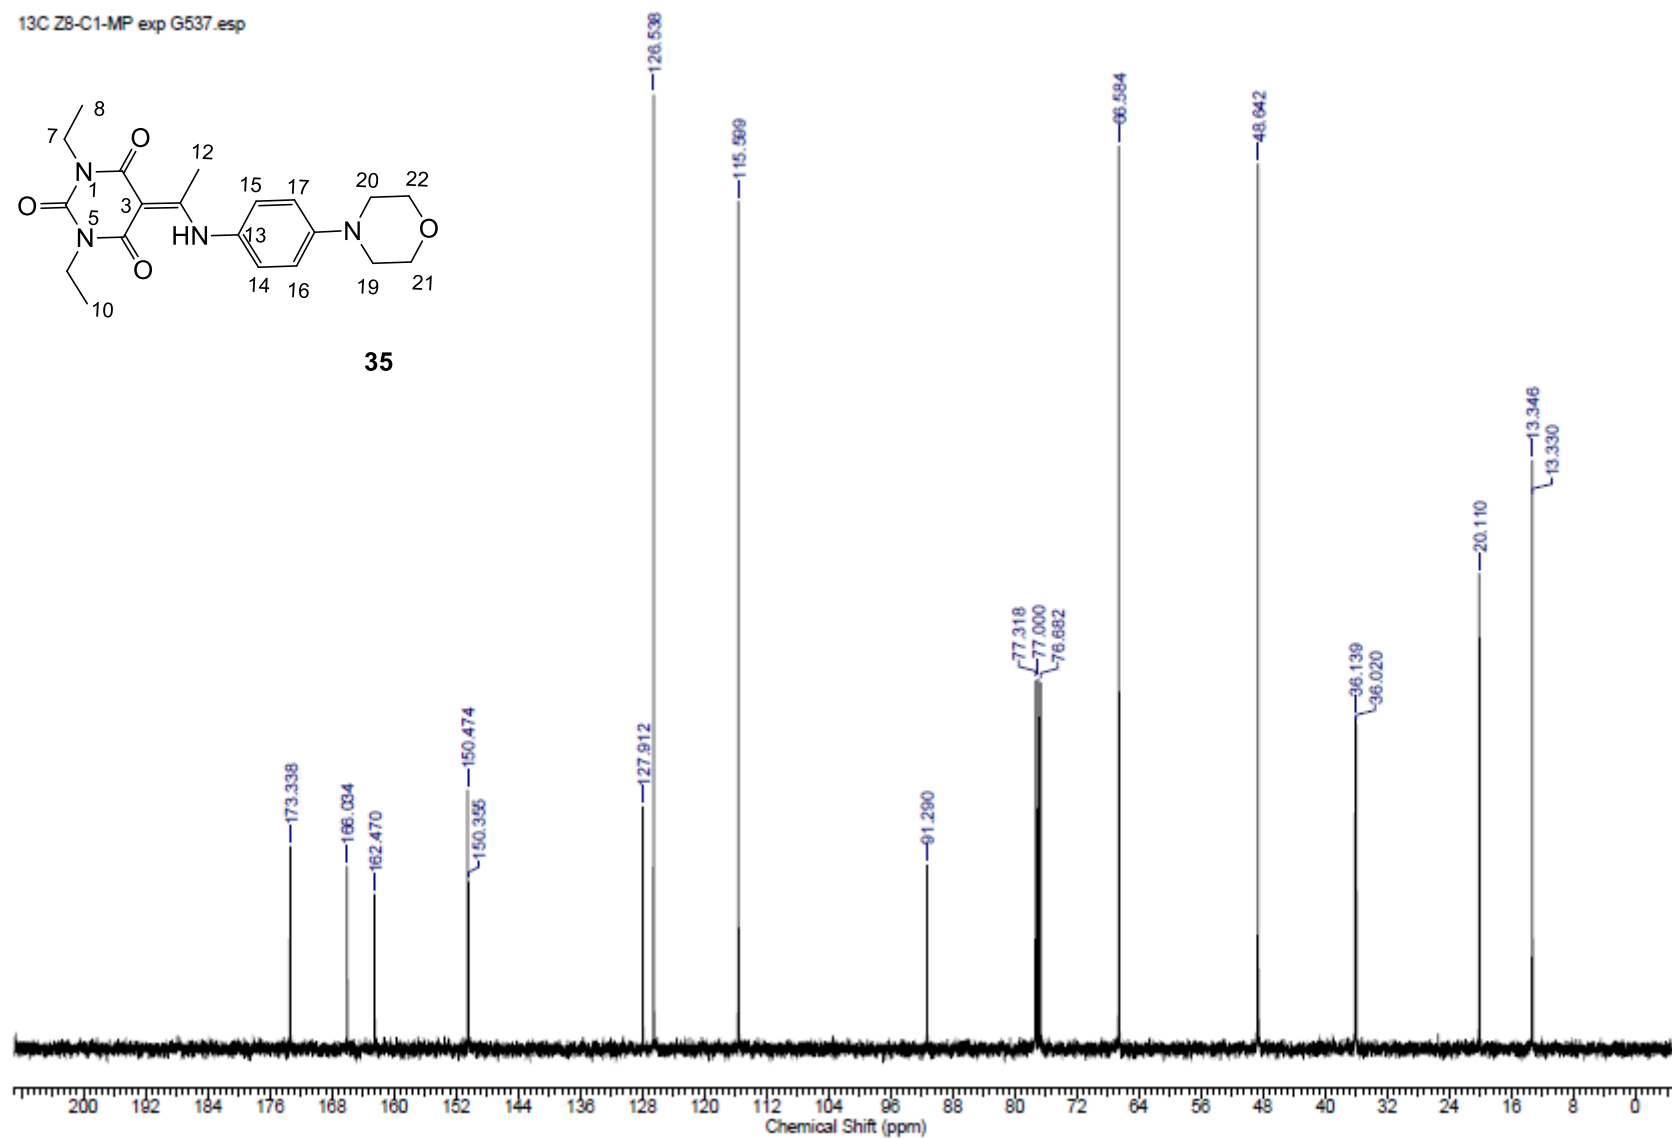



1H G555.esp

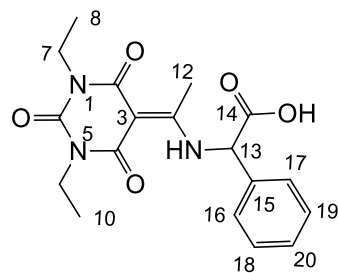

36

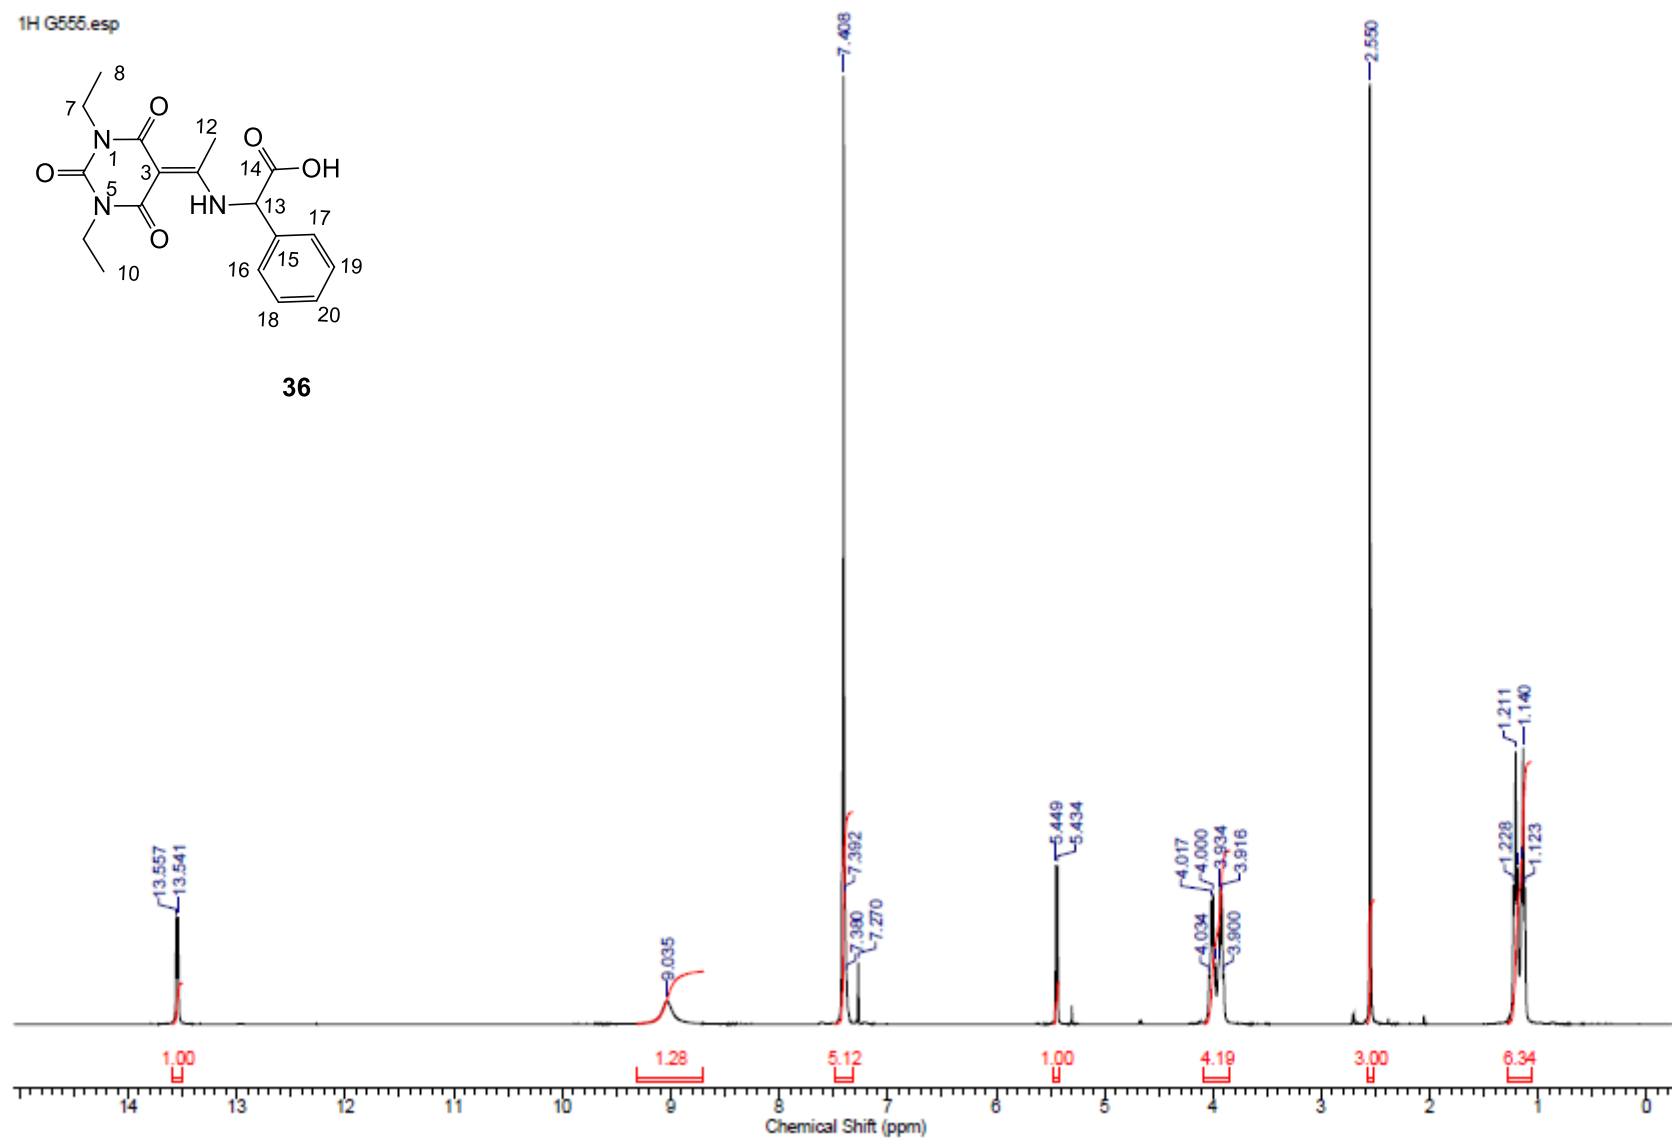

13C G555.esp

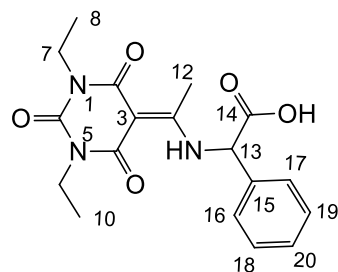

36

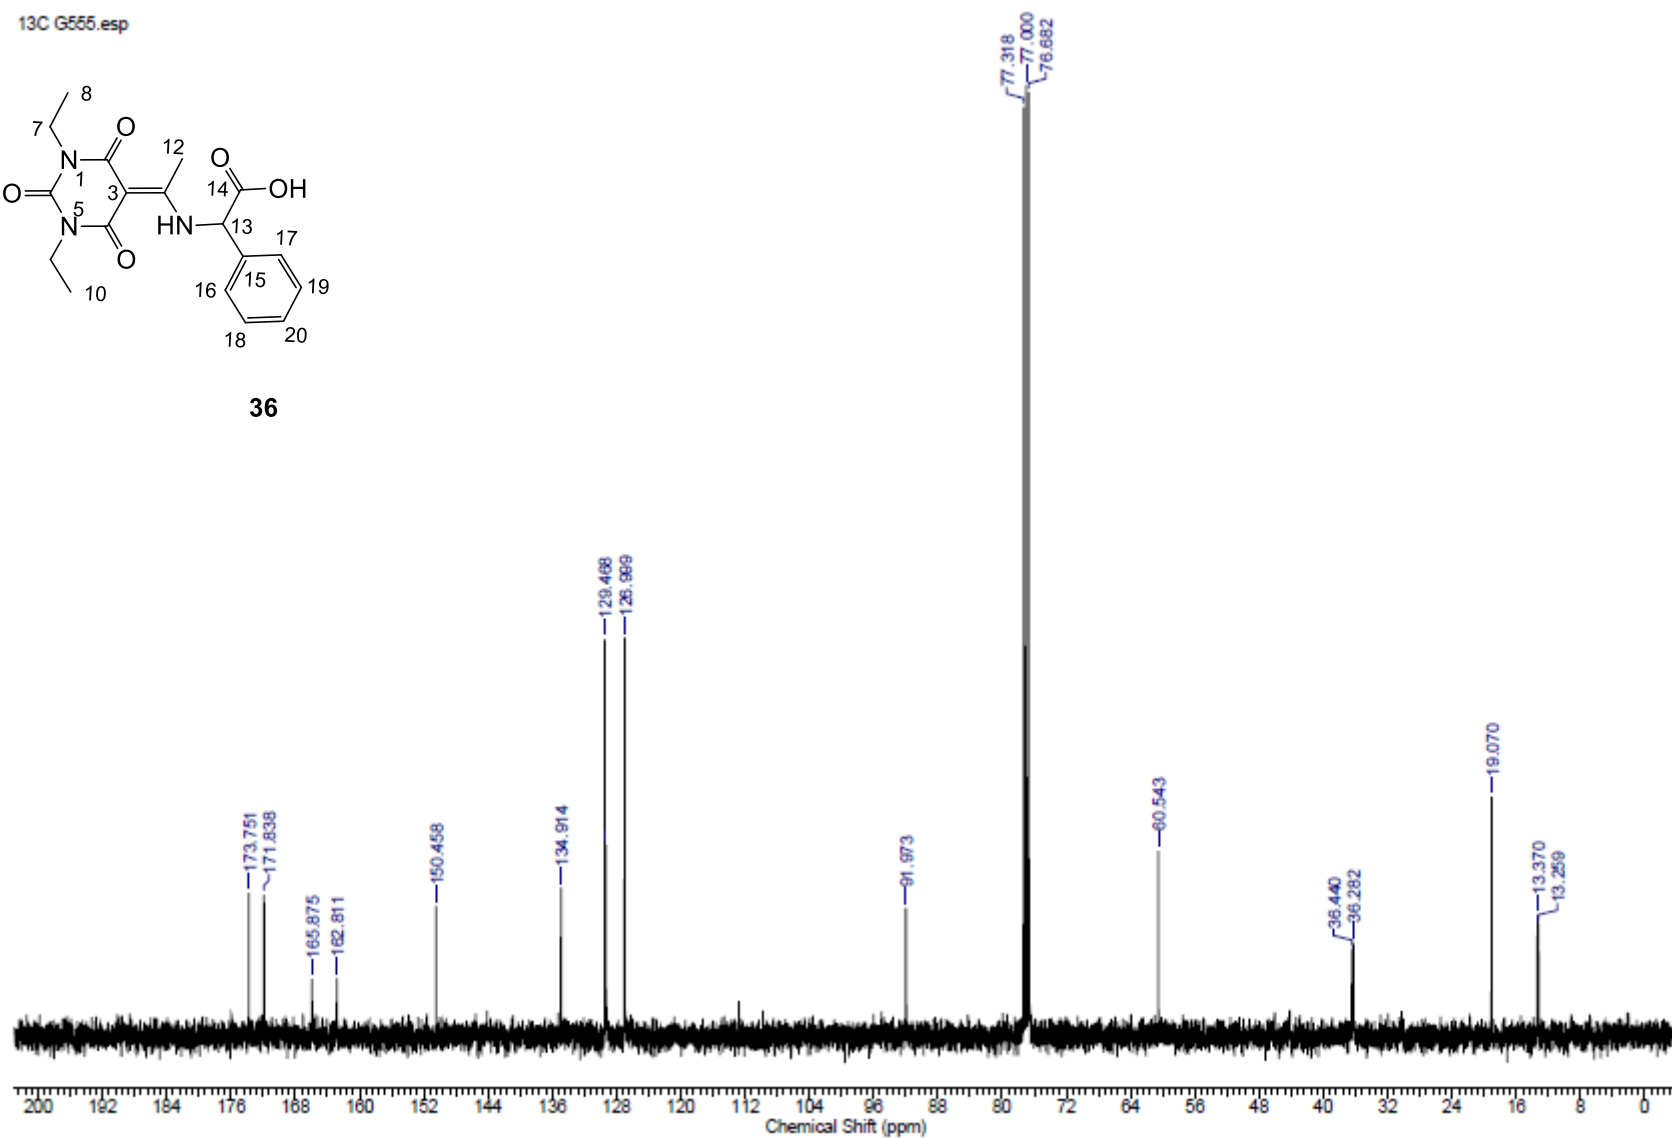

1H Z3-C1ADD-APM exp G471.esp

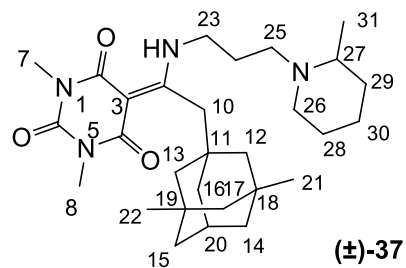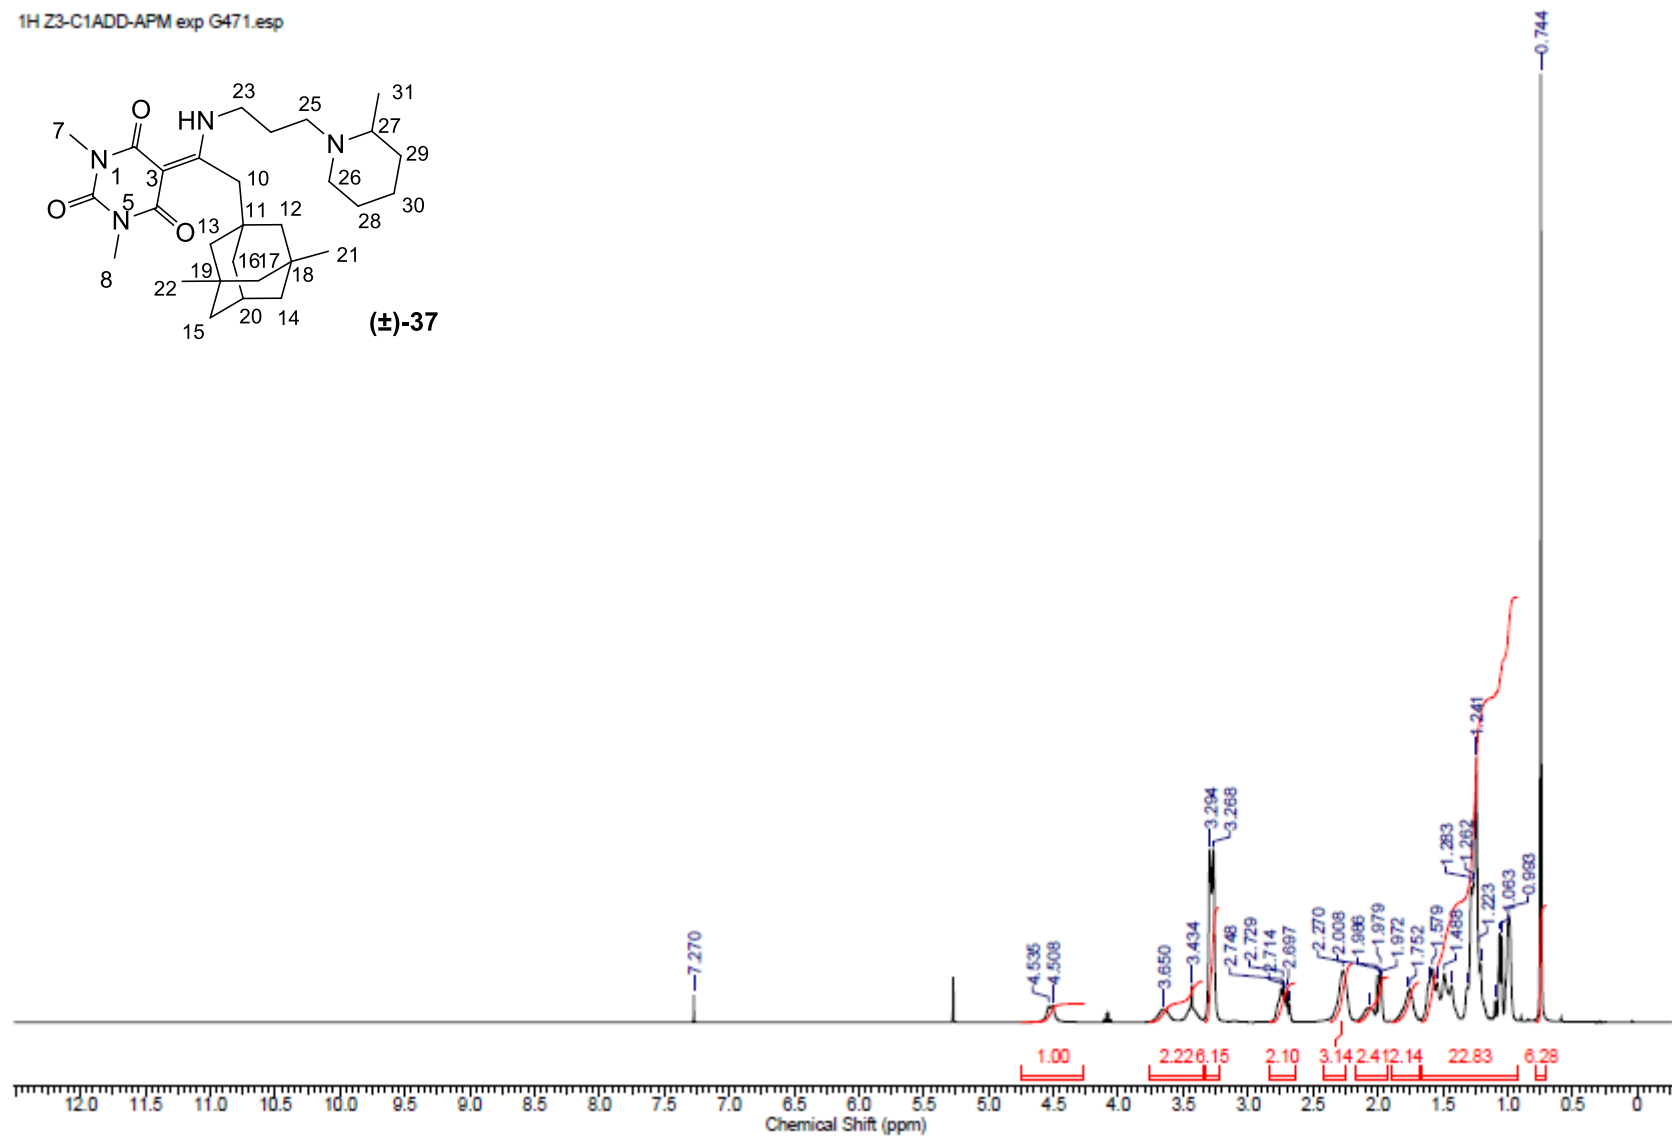

13C Z3-C1ADD-APM exp G471.esp

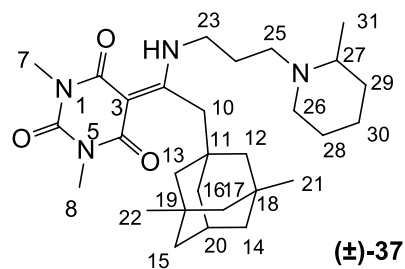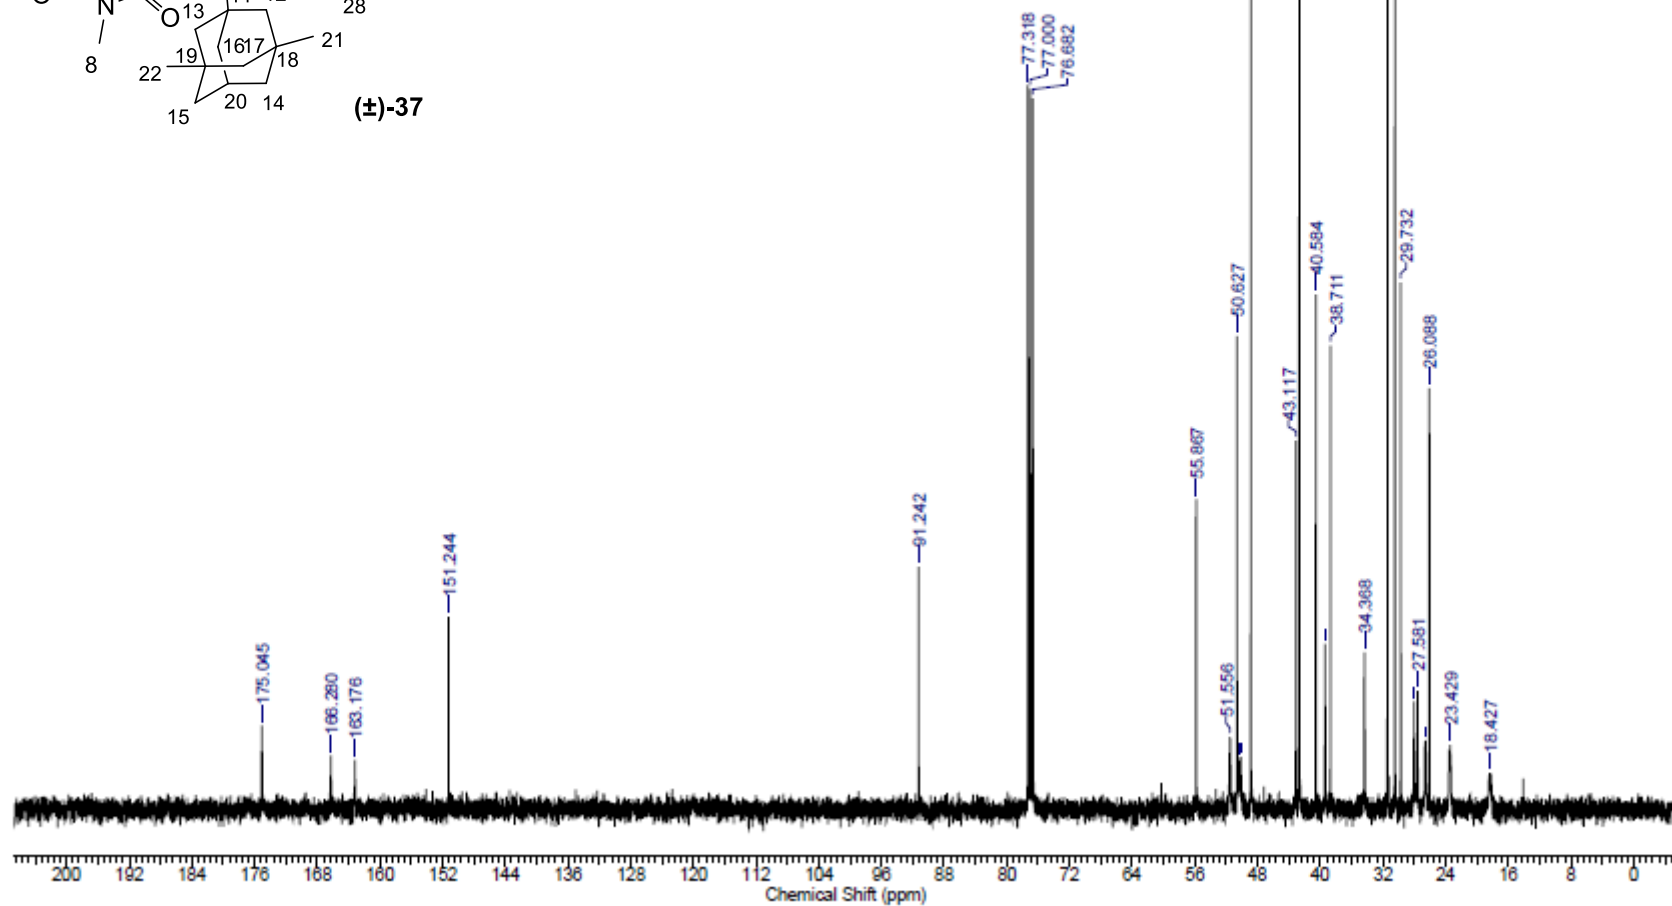

Supplement: s2 [file s2]
