# Supplementary material for: Antibacterial Barbituric Acid Analogues Inspired from Natural 3-Acyltetramic Acids; Synthesis, Tautomerism and Structure and Physicochemical Property-Antibacterial Activity Relationships
Source: PubMed Central journal article supplement (PMC6272196; doi:10.3390/molecules20033582), 2015-02-20
Supplement: molecules-20-03582-s001.pdf [file molecules-20-03582-s001.pdf]

## Supplementary

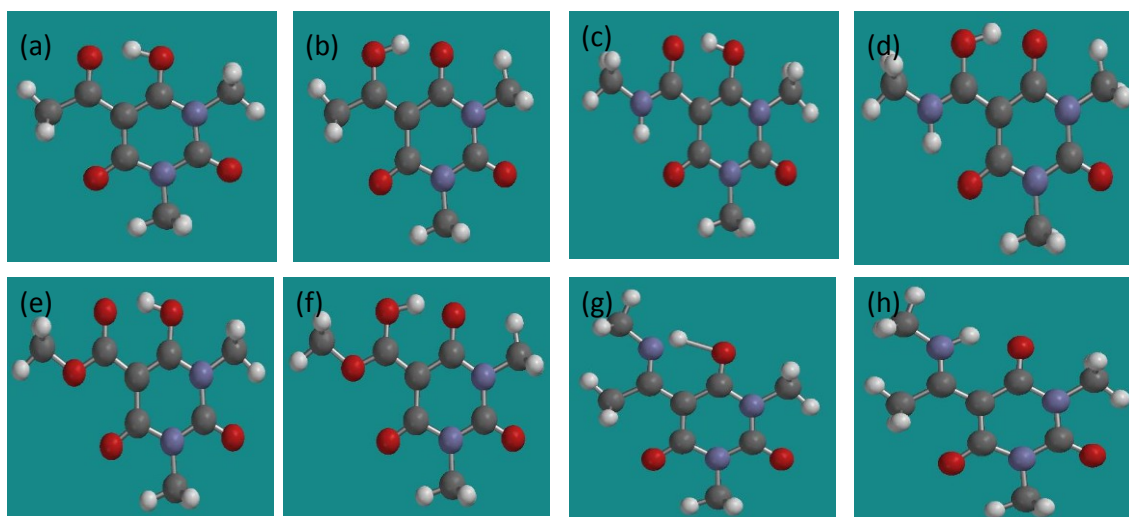

**Figure S1.** Most stable geometry at ground state in computational calculation; 3-acyl **2a** (a) *endo*-enol, (b) *exo*-enol, 3-carboxamide **43a** (c) *endo*-enol, (d) *exo*-enol, 3-alkoxycarbonyl **43b** (e) *endo*-enol, (f) *exo*-enol, 3-enamine **43c** (g) *endo*-enol and (h) *exo*-enol.

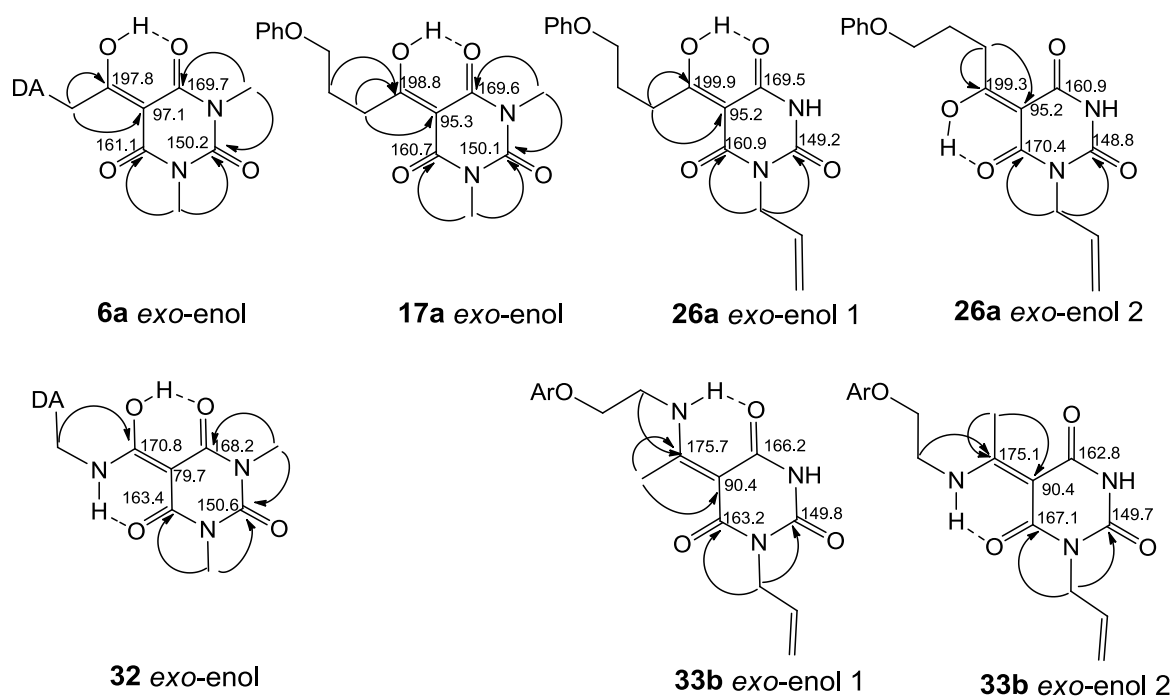

**Figure S2.** HMBC correlation of representative analogues.

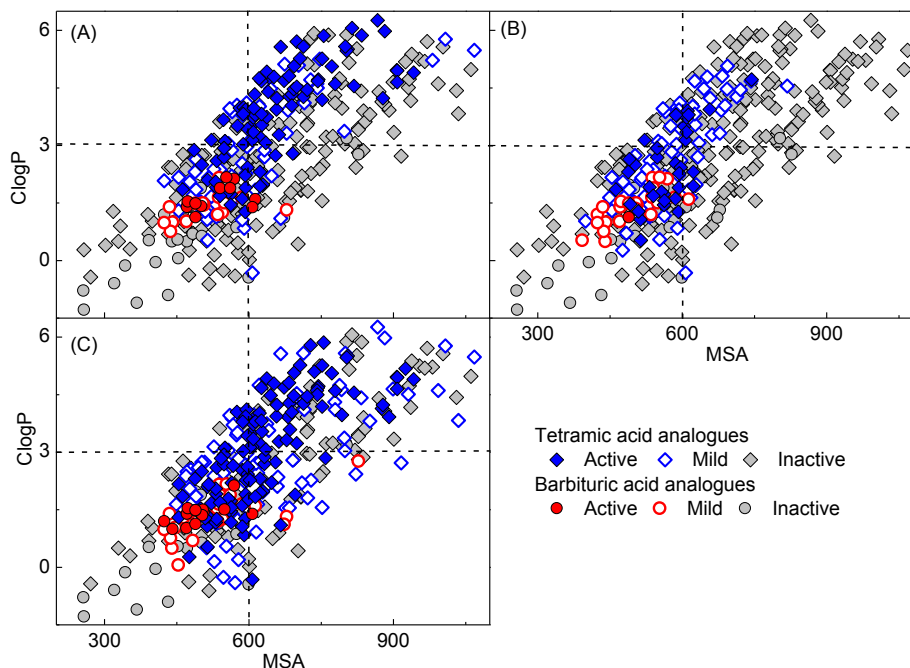

**Figure S3.** Plot of ClogP against MSA of barbituric acids 2-37 along with tetramic acids in our previous reports [1–4] against (A) MRSA, (B) *H. influenzae* 3 and (C) efflux-negative *H. influenzae* 4. Active, mild and inactive mean that the values are  $\text{MIC} \leq 4 \mu\text{g/mL}$ ,  $4 \mu\text{g/mL} < \text{MIC} \leq 32 \mu\text{g/mL}$  and  $\text{MIC} > 32 \mu\text{g/mL}$ , respectively.

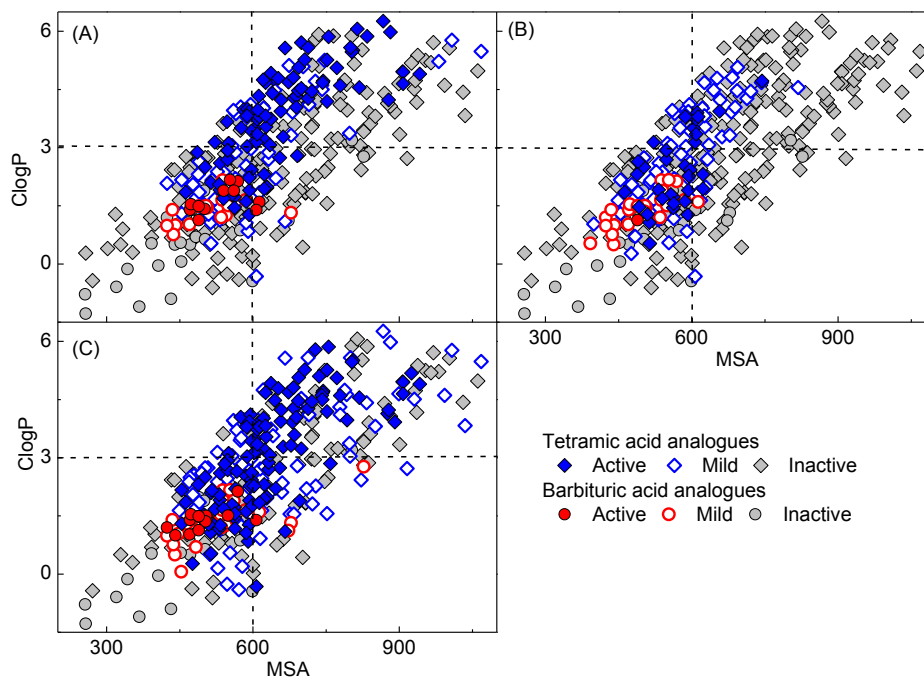

**Figure S4.** Plot of PSA against MSA of barbituric acids 2-37 along with tetramic acids in our previous reports [1–4] against (A) MRSA, (B) *H. influenzae* 3 and (C) efflux-negative *H. influenzae* 4. Active, mild and inactive mean that the values are  $\text{MIC} \leq 4 \mu\text{g/mL}$ ,  $4 \mu\text{g/mL} < \text{MIC} \leq 32 \mu\text{g/mL}$  and  $\text{MIC} > 32 \mu\text{g/mL}$ , respectively.

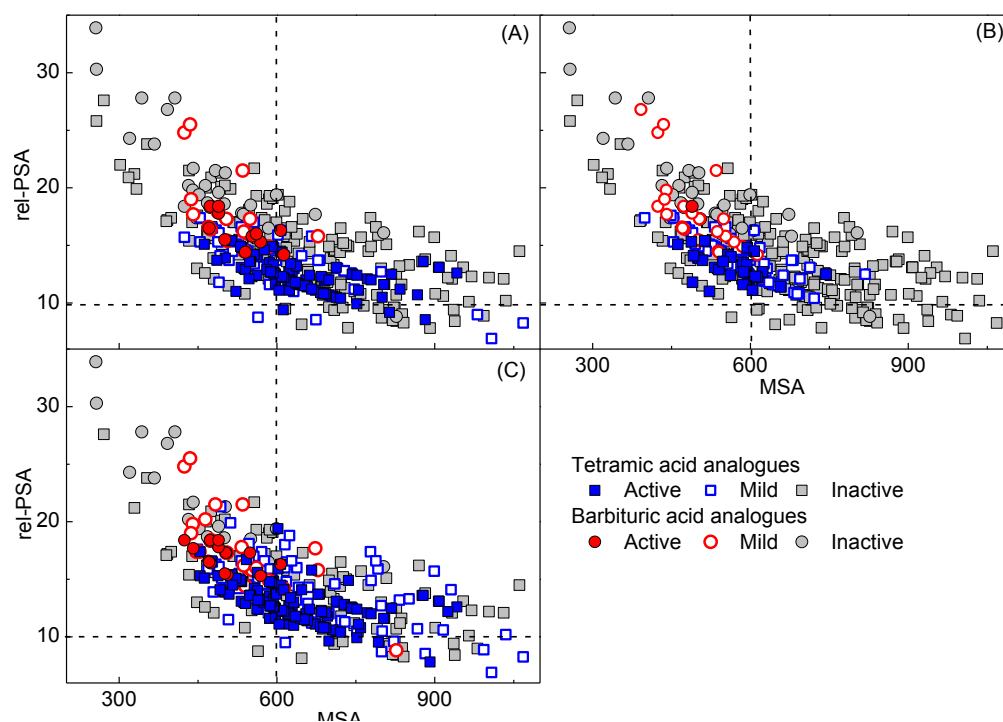

**Figure S5.** Plot of rel-PSA against MSA of barbituric acids **2–37** along with tetramic acids in our previous reports [1–4] against (A) MRSA; (B) *H. influenzae* 3 and (C) efflux-negative *H. influenzae* 4. Active, mild and inactive mean that the values are  $\text{MIC} \leq 4 \mu\text{g/mL}$ ,  $4 \mu\text{g/mL} < \text{MIC} \leq 32 \mu\text{g/mL}$  and  $\text{MIC} > 32 \mu\text{g/mL}$ , respectively.

**Table S1.** Physicochemical properties of barbiturates **2–37** <sup>a,b</sup>.

|           | Mw  | MSA          | PSA  | re-PSA       | ClogP | ClogD <sub>7.4</sub> | H-D/H-A | RB |
|-----------|-----|--------------|------|--------------|-------|----------------------|---------|----|
| <b>2a</b> | 198 | 257          | 77.9 | 30.3         | −1.28 | −2.26                | 1/4     | 0  |
| <b>2b</b> | 226 | 320          | 77.9 | 24.3         | −0.59 | −1.44                | 1/4     | 2  |
| <b>2c</b> | 256 | 367          | 87.2 | 23.8         | −1.10 | −1.99                | 1/5     | 4  |
| <b>3</b>  | 284 | 432          | 87.2 | 20.2         | −0.90 | −2.26                | 1/5     | 4  |
| <b>4</b>  | 282 | 447          | 77.9 | 17.4         | 1.04  | 0.11                 | 1/4     | 4  |
| <b>5a</b> | 296 | 474          | 77.9 | 16.4         | 1.48  | 0.62                 | 1/4     | 4  |
| <b>5b</b> | 324 | 538          | 77.9 | 14.5         | 2.16  | 1.36                 | 1/4     | 6  |
| <b>5c</b> | 354 | 585          | 87.2 | 14.9         | 1.65  | 0.81                 | 1/5     | 8  |
| <b>6a</b> | 332 | 470          | 77.9 | 16.6         | 1.02  | 0.00                 | 1/4     | 2  |
| <b>6b</b> | 346 | 506          | 77.9 | 15.4         | 1.45  | 0.46                 | 1/4     | 2  |
| <b>6c</b> | 360 | 540          | 77.9 | 14.4         | 1.89  | 0.93                 | 1/4     | 2  |
| <b>7a</b> | 346 | 501          | 77.9 | 15.5         | 1.42  | 0.51                 | 1/4     | 3  |
| <b>7b</b> | 404 | 613          | 87.2 | 14.2         | 1.60  | 0.70                 | 1/5     | 7  |
| <b>8a</b> | 294 | 441          | 77.9 | 17.7         | 1.00  | 0.10                 | 1/4     | 3  |
| <b>8b</b> | 308 | 471          | 77.9 | 16.5         | 1.40  | 0.54                 | 1/4     | 4  |
| <b>9</b>  | 352 | 545          | 87.2 | 16.0         | 1.26  | −1.35                | 1/5     | 4  |
| <b>10</b> | 350 | 533          | 95.0 | 17.8         | 1.54  | 0.61                 | 1/5     | 4  |
| <b>11</b> | 350 | 536          | 95.0 | 17.7         | 1.14  | 0.15                 | 1/5     | 5  |
| <b>12</b> | 392 | 584          | 96.4 | 16.5         | 1.05  | −0.06                | 1/6     | 9  |
| <b>13</b> | 541 | 803          | 129  | 16.1         | 3.19  | 2.10                 | 1/7     | 4  |
| <b>14</b> | 523 | <sup>b</sup> | 141  | <sup>b</sup> | 1.71  | 0.17                 | 1/9     | 5  |

Table S1. Cont.

|            | <b>Mw</b> | <b>MSA</b> | <b>PSA</b> | <b>re-PSA</b> | <b>ClogP</b> | <b>ClogD<sub>7.4</sub></b> | <b>H-D/H-A</b> | <b>RB</b> |
|------------|-----------|------------|------------|---------------|--------------|----------------------------|----------------|-----------|
| <b>15a</b> | 407       | 599        | 116        | 19.4          | −0.44        | −3.42                      | 2/6            | 6         |
| <b>15b</b> | 434       | 678        | 107        | 15.8          | 1.32         | 0.15                       | 2/5            | 6         |
| <b>16</b>  | 476       | 673        | 119        | 17.7          | 1.12         | −0.34                      | 2/7            | 6         |
| <b>17a</b> | 318       | 440        | 87.2       | 19.8          | 0.50         | −0.65                      | 1/5            | 5         |
| <b>17b</b> | 332       | 471        | 87.2       | 18.5          | 0.50         | −0.59                      | 1/5            | 6         |
| <b>17c</b> | 368       | 504        | 87.2       | 17.3          | 1.50         | 0.37                       | 1/5            | 5         |
| <b>18a</b> | 346       | 503        | 87.2       | 17.3          | 1.36         | 0.15                       | 1/5            | 6         |
| <b>18b</b> | 374       | 569        | 87.2       | 15.3          | 2.13         | 0.91                       | 1/5            | 6         |
| <b>18c</b> | 346       | 504        | 87.2       | 17.3          | 1.44         | 0.41                       | 1/5            | 5         |
| <b>18d</b> | 346       | 505        | 87.2       | 17.3          | 1.44         | 0.40                       | 1/5            | 5         |
| <b>18e</b> | 367       | 488        | 87.2       | 17.9          | 1.49         | 0.03                       | 1/5            | 5         |
| <b>18f</b> | 387       | 473        | 87.2       | 18.4          | 1.54         | −0.32                      | 1/5            | 5         |
| <b>18g</b> | 367       | 489        | 87.2       | 17.8          | 1.49         | 0.03                       | 1/5            | 5         |
| <b>19a</b> | 395       | 553        | 87.2       | 15.8          | 2.17         | 0.80                       | 1/5            | 7         |
| <b>19b</b> | 360       | 537        | 87.2       | 16.2          | 1.65         | 0.53                       | 1/5            | 7         |
| <b>20</b>  | 372       | 549        | 95.0       | 17.3          | 1.51         | 0.05                       | 1/5            | 5         |
| <b>21</b>  | 390       | 483        | 104        | 21.5          | 0.70         | −0.82                      | 1/5            | 4         |
| <b>22</b>  | 302       | 424        | 77.9       | 18.4          | 1.20         | 0.27                       | 1/4            | 4         |
| <b>23a</b> | 327       | 437        | 82.9       | 19.0          | 0.76         | −0.63                      | 1/4            | 2         |
| <b>23b</b> | 341       | 464        | 93.7       | 20.2          | 1.30         | 0.42                       | 2/4            | 4         |
| <b>24</b>  | 332       | 475        | 87.2       | 18.4          | 1.40         | −1.46                      | 1/5            | 3         |
| <b>25a</b> | 210       | 256        | 86.7       | 33.9          | −0.78        | −1.80                      | 2/4            | 2         |
| <b>25b</b> | 308       | 473        | 86.7       | 18.3          | 1.97         | 1.05                       | 2/4            | 6         |
| <b>26a</b> | 330       | 441        | 95.9       | 21.7          | 1.00         | −0.21                      | 2/5            | 7         |
| <b>26b</b> | 379       | 489        | 95.9       | 19.6          | 1.98         | 0.48                       | 2/5            | 7         |
| <b>26c</b> | 325       | 392        | 105        | 26.8          | 0.53         | −1.24                      | 3/5            | 5         |
| <b>26d</b> | 339       | 424        | 105        | 24.8          | 0.99         | −0.63                      | 3/5            | 5         |
| <b>27</b>  | 264       | 343        | 95.5       | 27.8          | −0.13        | −1.34                      | 3/4            | 2         |
| <b>28</b>  | 294       | 406        | 113        | 27.8          | −0.04        | −1.28                      | 3/5            | 3         |
| <b>29a</b> | 330       | 438        | 111        | 25.3          | 1.40         | 0.83                       | 4/6            | 3         |
| <b>29b</b> | 358       | 502        | 93.2       | 18.6          | 1.89         | 1.51                       | 2/6            | 3         |
| <b>29c</b> | 388       | 552        | 102        | 18.5          | 1.51         | 1.23                       | 2/7            | 5         |
| <b>30</b>  | 386       | 536        | 115        | 21.5          | 1.20         | 0.93                       | 3/6            | 6         |
| <b>31a</b> | 339       | 562        | 90.0       | 16.0          | 1.89         | 2.14                       | 2/5            | 6         |
| <b>31b</b> | 369       | 609        | 99.2       | 16.3          | 1.39         | 1.62                       | 2/6            | 8         |
| <b>32</b>  | 347       | 491        | 90.0       | 18.3          | 1.13         | 1.34                       | 2/5            | 3         |
| <b>33a</b> | 329       | 452        | 87.7       | 19.4          | 0.55         | 0.46                       | 2/5            | 7         |
| <b>33b</b> | 364       | 468        | 87.7       | 18.7          | 1.07         | 0.92                       | 2/5            | 7         |
| <b>34</b>  | 317       | 453        | 79.0       | 17.4          | 0.06         | 0.06                       | 1/5            | 5         |
| <b>35</b>  | 386       | 574        | 82.2       | 14.3          | 0.87         | 0.87                       | 1/6            | 5         |
| <b>36</b>  | 359       | 502        | 107        | 21.3          | 0.64         | −2.60                      | 2/6            | 6         |
| <b>37</b>  | 499       | 827        | 73.0       | 8.83          | 2.77         | 0.10                       | 1/5            | 7         |

a; **Mw**; molecular weight, **MSA**; molecular surface area, **PSA**; polar surface area, **%PAS**; relative polar surface area =  $(PSA/MSA) \times 100$ , **ClogP**; calculated partition coefficient, **ClogD<sub>7.4</sub>**; calculated distribution coefficient at pH 7.4, **HD**; hydrogen bond donor count, **HA**; hydrogen bond acceptor count, **RB**; rotatable bond count, b; could not be calculated.

**Table S2.** Physical properties of topical antibiotics <sup>a,b</sup>.

| Entry | Name          | Mw  | MSA | PSA  | %PSA | ClogP | ClogD <sub>7.4</sub> | HD/HA | RB |
|-------|---------------|-----|-----|------|------|-------|----------------------|-------|----|
| 1     | Fusidic acid  | 517 | 844 | 104  | 12.3 | 4.26  | 1.57                 | 3/5   | 6  |
| 2     | Clofoctol     | 365 | 569 | 20.2 | 3.6  | 8.06  | 8.06                 | 1/1   | 5  |
| 3     | Triclosan     | 290 | 319 | 29.5 | 9.24 | 4.75  | 4.56                 | 1/1   | 2  |
| 4     | Mupirocin     | 501 | 812 | 146  | 18.0 | 2.12  | -0.41                | 4/8   | 17 |
| 5     | Retapamulin   | 518 | 838 | 66.8 | 12.5 | 4.59  | 2.31                 | 1/4   | 6  |
| 6     | REP8839       | 450 | 529 | 53.2 | 9.94 | 4.44  | 2.76                 | 3/4   | 8  |
| 7     | Torezolid     | 370 | 476 | 106  | 22.2 | 2.41  | 2.41                 | 1/7   | 4  |
| 8     | Azidamfenicol | 295 | 397 | 145  | 36.5 | -0.53 | -0.54                | 3/7   | 7  |
| 9     | Meclocycline  | 477 | 547 | 182  | 33.3 | -1.27 | -6.89                | 6/9   | 2  |

a; see foot note in Table S1 for the abbreviation, b; current antibiotics, see reference [5–8];

**Table S3.** Physical properties of Gram-positive only antibiotics.

| Entry                                                 | Name             | Mw         | MSA        | PSA         | %PSA        | ClogP       | ClogD <sub>7.4</sub> | HD/HA      | RB       |
|-------------------------------------------------------|------------------|------------|------------|-------------|-------------|-------------|----------------------|------------|----------|
| Penicillins                                           |                  |            |            |             |             |             |                      |            |          |
| 1                                                     | Cloxacillin      | 435        | 538        | 113         | 21.0        | 1.94        | -1.43                | 2/5        | 4        |
| 2                                                     | Dicloxacillin    | 469        | 553        | 113         | 20.4        | 2.45        | -0.91                | 2/5        | 3        |
| 3                                                     | Oxacillin        | 401        | 522        | 113         | 21.6        | 1.42        | -1.95                | 2/5        | 4        |
| 4                                                     | Penicillin G     | 334        | 449        | 86.7        | 19.3        | 0.93        | -2.53                | 2/4        | 4        |
| 5                                                     | Penicillin V     | 350        | 466        | 95.9        | 20.6        | 0.59        | -2.93                | 2/5        | 5        |
| 6                                                     | Nafcillin        | 400        | 528        | 95.9        | 18.2        | 1.56        | -1.97                | 2/5        | 4        |
| 7                                                     | Meticillin       | 380        | 515        | 105         | 20.4        | 0.31        | -3.30                | 2/6        | 5        |
| Lincosamides, Oxazolidinones & 2,4-Diaminopyrimidines |                  |            |            |             |             |             |                      |            |          |
| 8                                                     | Lincomycin       | 407        | 630        | 122         | 19.4        | -0.80       | -1.47                | 5/7        | 7        |
| 9                                                     | Clindamycin      | 425        | 635        | 102         | 16.1        | 0.65        | 0.27                 | 4/6        | 7        |
| <b>10</b>                                             | <b>Linezolid</b> | <b>337</b> | <b>482</b> | <b>71.1</b> | <b>14.8</b> | <b>0.76</b> | <b>0.76</b>          | <b>1/5</b> | <b>4</b> |
| 11                                                    | Ranbezolid       | 461        | 641        | 124         | 19.4        | 1.52        | 1.50                 | 1/7        | 7        |
| 12                                                    | Radezolid        | 438        | 606        | 112         | 18.5        | 1.67        | 1.32                 | 3/6        | 8        |
| 13                                                    | Iclaprim         | 354        | 502        | 106         | 21.0        | 2.34        | 2.16                 | 2/7        | 5        |
| 14                                                    | Trimethoprim     | 344        | 481        | 115         | 23.8        | 1.73        | 1.55                 | 2/8        | 5        |

**Table S4.** Physical properties of Gram positive and negative penicillins and other antibiotics.

| Entry                  | Name            | Mw  | MSA | PSA  | %PSA | ClogP | ClogD <sub>7.4</sub> | HD/HA | RB |
|------------------------|-----------------|-----|-----|------|------|-------|----------------------|-------|----|
| Penicillins            |                 |     |     |      |      |       |                      |       |    |
| 1                      | Carbenicillin   | 378 | 481 | 124  | 25.8 | 0.72  | −6.20                | 3/6   | 5  |
| 2                      | Ticarcillin     | 384 | 460 | 124  | 27.0 | 0.39  | −6.35                | 3/6   | 5  |
| 3                      | Ampicillin      | 349 | 466 | 113  | 24.2 | 0.15  | −3.55                | 3/5   | 4  |
| 4                      | Cyclacillin     | 341 | 486 | 113  | 23.3 | −0.25 | −4.11                | 3/5   | 3  |
| 5                      | Amoxicillin     | 365 | 476 | 133  | 27.9 | −0.13 | −3.84                | 4/6   | 4  |
| 6                      | Azlocillin      | 461 | 595 | 148  | 24.9 | −0.25 | −3.74                | 4/6   | 5  |
| 7                      | Mezlocillin     | 540 | 690 | 174  | 25.2 | −0.59 | −4.07                | 3/8   | 5  |
| 8                      | Piperacillin    | 518 | 685 | 156  | 22.8 | −0.33 | −3.81                | 3/7   | 6  |
| Penems and carbapenems |                 |     |     |      |      |       |                      |       |    |
| 9                      | Faropenem       | 285 | 354 | 87.1 | 24.6 | −1.82 | −4.92                | 2/5   | 3  |
| 10                     | Ertapenem       | 476 | 608 | 156  | 25.7 | −1.39 | −7.73                | 5/8   | 7  |
| 11                     | Doripenem       | 421 | 551 | 162  | 29.4 | −3.79 | −6.88                | 5/8   | 6  |
| 12                     | Meropenem       | 383 | 531 | 110  | 20.7 | −2.82 | −5.91                | 3/6   | 5  |
| 13                     | Imipenem        | 313 | 417 | 114  | 27.3 | −2.27 | −5.30                | 4/6   | 6  |
| 14                     | Tomopenem       | 538 | 741 | 192  | 25.9 | −3.63 | −9.54                | 6/10  | 8  |
| Amphenicols            |                 |     |     |      |      |       |                      |       |    |
| 15                     | Chloramphenicol | 323 | 389 | 115  | 29.7 | 0.57  | 0.34                 | 3/5   | 6  |
| 16                     | Thiamphenicol   | 356 | 442 | 104  | 23.5 | −0.61 | −0.79                | 3/5   | 6  |

**Table S5.** Physical properties of cephalosporins (1st and 2nd generations).

| Entry | Name               | Mw  | MSA | PSA  | %PSA | ClogP | ClogD <sub>7.4</sub> | HD/HA | RB |
|-------|--------------------|-----|-----|------|------|-------|----------------------|-------|----|
| 1     | Cefalexin (1st)    | 347 | 435 | 113  | 26.0 | −0.31 | −3.97                | 3/5   | 4  |
| 2     | Cefadroxil (1st)   | 363 | 446 | 133  | 29.8 | −0.60 | −4.26                | 4/6   | 4  |
| 3     | Cefaloglycin (1st) | 405 | 509 | 139  | 27.3 | −1.18 | −4.87                | 3/6   | 7  |
| 4     | Cefradine (1st)    | 349 | 428 | 113  | 26.4 | −0.81 | −4.51                | 3/5   | 4  |
| 5     | Cefroxadine (1st)  | 365 | 444 | 122  | 27.5 | −2.20 | −5.93                | 3/6   | 5  |
| 6     | Cefapirin (1st)    | 423 | 509 | 126  | 24.8 | −1.48 | −4.93                | 2/6   | 8  |
| 7     | Cefalotin (1st)    | 396 | 471 | 113  | 24.0 | −0.58 | −4.01                | 2/5   | 7  |
| 8     | Cefatrizine (1st)  | 463 | 534 | 175  | 32.8 | −0.35 | −4.08                | 5/8   | 7  |
| 9     | Cefalonium (1st)   | 459 | 548 | 137  | 25.0 | −4.68 | −5.05                | 2/5   | 7  |
| 10    | Cefaloridine (1st) | 415 | 505 | 93.4 | 18.5 | −3.33 | −3.70                | 1/4   | 6  |
| 11    | Ceftazole (1st)    | 440 | 466 | 156  | 33.5 | −2.65 | −6.27                | 2/9   | 7  |
| 12    | Cefazolin (1st)    | 455 | 498 | 156  | 31.3 | −2.36 | −5.96                | 2/9   | 7  |
| 13    | Cefazedone (1st)   | 548 | 555 | 133  | 24.0 | 0.96  | −2.61                | 2/8   | 7  |
| 14    | Cefazaflur (1st)   | 470 | 499 | 130  | 26.1 | 0.50  | −3.05                | 2/7   | 8  |
| 15    | Cefacetriole (1st) | 339 | 399 | 137  | 34.3 | −2.56 | −6.94                | 2/6   | 6  |
| 16    | Cerbacephem (2nd)  | 350 | 428 | 113  | 26.4 | −0.96 | −4.68                | 3/5   | 4  |
| 17    | Cefaclor (2nd)     | 368 | 419 | 113  | 27.0 | −0.83 | −4.56                | 3/5   | 4  |
| 18    | Cefprozil (2nd)    | 389 | 478 | 133  | 27.8 | −0.06 | −3.71                | 4/6   | 5  |
| 19    | Cefamandole (2nd)  | 463 | 541 | 151  | 27.9 | −0.30 | −3.83                | 3/8   | 7  |
| 20    | Cefonicid (2nd)    | 543 | 611 | 205  | 33.6 | −1.15 | −7.00                | 4/11  | 9  |

Table S5. Cont.

| Entry | Name                | Mw  | MSA | PSA | %PSA | ClogP | ClogD <sub>7.4</sub> | HD/HA | RB |
|-------|---------------------|-----|-----|-----|------|-------|----------------------|-------|----|
| 21    | Cefuroxime (2nd)    | 424 | 495 | 174 | 35.2 | −1.44 | −5.01                | 3/7   | 8  |
| 22    | Cefoxin (2nd)       | 464 | 561 | 212 | 37.8 | −2.54 | −8.30                | 5/9   | 11 |
| 23    | Cefotetan (2nd)     | 576 | 606 | 220 | 36.3 | −0.87 | −7.64                | 4/11  | 9  |
| 24    | Flomoxef (2nd)      | 496 | 578 | 169 | 29.2 | −0.67 | −4.22                | 3/10  | 11 |
| 25    | Cefminox (2nd)      | 520 | 617 | 203 | 32.9 | −1.84 | −7.68                | 4/11  | 11 |
| 26    | Cefotiam (2nd)      | 526 | 642 | 172 | 26.8 | −0.71 | −5.18                | 3/10  | 10 |
| 27    | Cefmetazole (2nd)   | 472 | 552 | 163 | 29.5 | −1.06 | −4.60                | 2/9   | 9  |
| 28    | Cefuzonam (2nd)     | 514 | 545 | 173 | 31.7 | −0.58 | −4.22                | 3/10  | 8  |
| 29    | Cefbuperazone (2nd) | 614 | 748 | 240 | 32.1 | −2.71 | −6.25                | 5/12  | 9  |
| 30    | Ceforanide (2nd)    | 520 | 620 | 194 | 31.3 | −0.91 | −9.83                | 4/10  | 10 |

Table S6. Physical properties of cephalosporins (3rd–5th generations).

| Entry | Name               | Mw  | MSA | PSA | %PSA | ClogP | ClogD <sub>7.4</sub> | HD/HA | RB |
|-------|--------------------|-----|-----|-----|------|-------|----------------------|-------|----|
| 1     | Ceftizoxime (3rd)  | 383 | 422 | 147 | 34.8 | −0.52 | −4.09                | 3/8   | 5  |
| 2     | Cefetamet (3rd)    | 397 | 452 | 147 | 32.5 | −0.36 | −3.92                | 3/8   | 5  |
| 3     | Cefpodoxime (3rd)  | 427 | 498 | 156 | 31.3 | −1.09 | −4.64                | 3/9   | 7  |
| 4     | Cefdaloxime (3rd)  | 413 | 463 | 167 | 36.1 | −1.82 | −7.80                | 4/9   | 6  |
| 5     | Cefditroren (3rd)  | 507 | 565 | 160 | 28.3 | 0.31  | −3.26                | 3/9   | 7  |
| 6     | Cefixime (3rd)     | 453 | 488 | 185 | 37.9 | −0.64 | −7.69                | 4/10  | 8  |
| 7     | Cefdinir (3rd)     | 395 | 415 | 158 | 38.1 | −0.91 | −6.89                | 4/8   | 5  |
| 8     | Cefotaxime (3rd)   | 455 | 524 | 174 | 33.2 | −1.24 | −4.80                | 3/9   | 8  |
| 9     | Ceftibuten (3rd)   | 410 | 442 | 163 | 36.9 | −0.48 | −7.15                | 4/8   | 6  |
| 10    | Cefcapene (3rd)    | 453 | 527 | 178 | 33.8 | −0.24 | −3.76                | 4/7   | 8  |
| 11    | Cefmenoxime (3rd)  | 512 | 568 | 191 | 33.6 | −0.40 | −3.99                | 3/11  | 8  |
| 12    | Cefpiramide (3rd)  | 613 | 703 | 209 | 29.7 | −0.41 | −3.96                | 5/11  | 9  |
| 13    | Cefoperazone (3rd) | 646 | 784 | 220 | 28.1 | −1.11 | −4.63                | 4/11  | 9  |
| 14    | Cefteram (3rd)     | 479 | 544 | 191 | 35.1 | −0.38 | −3.98                | 3/11  | 7  |
| 15    | Cefodizime (3rd)   | 585 | 654 | 197 | 30.1 | 0.71  | −6.03                | 4/11  | 10 |
| 16    | Ceftiolene (3rd)   | 595 | 626 | 226 | 36.1 | −1.50 | −5.93                | 4/12  | 10 |
| 17    | Ceftriaxone (3rd)  | 555 | 604 | 209 | 34.6 | −1.02 | −5.70                | 4/12  | 8  |
| 18    | Ceftazime (3rd)    | 547 | 660 | 191 | 28.9 | −3.70 | −7.54                | 3/10  | 9  |
| 19    | Cefpimizole (3rd)  | 671 | 812 | 243 | 29.9 | −6.09 | −11.21               | 5/11  | 12 |
| 20    | Cefepime (4th)     | 481 | 610 | 150 | 24.6 | −5.19 | −4.14                | 2/8   | 7  |
| 21    | Cefquinome (4th)   | 529 | 656 | 154 | 23.5 | −3.46 | −3.83                | 2/8   | 7  |
| 22    | Cefpirome (4th)    | 515 | 624 | 154 | 24.7 | −3.85 | −4.22                | 2/8   | 7  |
| 23    | Cefozopran (4th)   | 515 | 594 | 171 | 28.8 | −4.05 | −4.42                | 2/10  | 7  |
| 24    | Ceftobiprole (5th) | 535 | 606 | 203 | 33.5 | −2.26 | −9.23                | 5/11  | 6  |

**Table S7.** Physical properties of tetracyclines.

| Entry | Name              | Mw  | MSA | PSA | %PSA | ClogP | ClogD <sub>7.4</sub> | HD/HA | RB |
|-------|-------------------|-----|-----|-----|------|-------|----------------------|-------|----|
| 1     | Tetracycline      | 444 | 562 | 182 | 32.4 | -2.16 | -7.39                | 6/9   | 2  |
| 2     | Doxycycline       | 444 | 557 | 182 | 32.7 | -1.81 | -7.00                | 6/9   | 2  |
| 3     | Oxytetracycline   | 460 | 570 | 202 | 35.4 | -3.23 | -8.56                | 7/10  | 2  |
| 4     | Metacycline       | 442 | 531 | 182 | 34.3 | -1.79 | -7.08                | 6/9   | 2  |
| 5     | Chlortetracycline | 479 | 576 | 182 | 31.6 | -1.64 | -7.16                | 6/9   | 2  |
| 6     | Minocycline       | 457 | 609 | 165 | 27.1 | -0.83 | -5.90                | 5/9   | 3  |
| 7     | Demeclocycline    | 465 | 542 | 182 | 33.6 | -1.72 | -7.28                | 6/9   | 2  |
| 8     | PTK 0796          | 557 | 821 | 177 | 21.6 | 0.41  | -4.78                | 6/10  | 7  |
| 9     | Rolitetra-cycline | 528 | 716 | 171 | 23.9 | -1.24 | -6.42                | 6/10  | 4  |
| 10    | Tigecycline       | 586 | 836 | 206 | 24.6 | -1.17 | -6.36                | 7/11  | 7  |
| 11    | Lymecycline       | 603 | 828 | 243 | 29.3 | -2.08 | -9.40                | 9/13  | 10 |

**Table S8.** Physical properties of sulfa drugs.

| Entry | Name                    | Mw  | MSA | PSA  | %PSA | ClogP | ClogD <sub>7.4</sub> | HD/HA | RB |
|-------|-------------------------|-----|-----|------|------|-------|----------------------|-------|----|
| 1     | Sulfadiazine            | 250 | 321 | 98.0 | 30.5 | 0.37  | -0.11                | 2/5   | 2  |
| 2     | Sulfamerazine           | 264 | 353 | 98.0 | 27.8 | 0.54  | 0.06                 | 2/5   | 2  |
| 3     | Sulfadimidine           | 278 | 386 | 98.0 | 25.4 | 0.71  | 0.24                 | 2/5   | 2  |
| 4     | Sulfametoxydiazine      | 280 | 369 | 107  | 29.0 | 0.12  | -0.32                | 2/6   | 3  |
| 5     | Sulfachlorpyradizine    | 284 | 337 | 98.0 | 29.1 | 0.77  | 0.07                 | 2/5   | 2  |
| 6     | Sulfamethoxy-pyridazine | 280 | 368 | 107  | 29.1 | 0.33  | -0.24                | 2/6   | 3  |
| 7     | Sulfadimethoxine        | 310 | 417 | 116  | 27.8 | 1.26  | 0.74                 | 2/7   | 4  |
| 8     | Sulfamonomethoxine      | 280 | 369 | 107  | 29.0 | 0.84  | 0.44                 | 2/6   | 3  |
| 9     | Sulfapyridine           | 249 | 332 | 85.1 | 25.6 | 1.21  | 1.18                 | 2/4   | 2  |
| 10    | Sulfanitran             | 335 | 441 | 121  | 27.4 | 1.89  | 1.70                 | 2/5   | 4  |
| 11    | Sulfaquinoxaline        | 300 | 384 | 98.0 | 25.5 | 1.70  | 1.10                 | 2/5   | 2  |
| 12    | Sulfaphenazole          | 314 | 413 | 90.0 | 21.8 | 1.72  | 1.19                 | 2/4   | 3  |
| 13    | Sulfathiazole           | 255 | 308 | 85.1 | 27.6 | 1.08  | 0.05                 | 2/4   | 2  |
| 14    | Sulfamethizole          | 270 | 332 | 98.0 | 29.5 | 0.03  | -1.05                | 2/5   | 2  |
| 15    | Sulfamethoxazole        | 253 | 333 | 98.2 | 29.5 | 1.04  | 0.13                 | 2/4   | 2  |
| 16    | Sulfafurazole           | 267 | 365 | 98.2 | 26.9 | 0.91  | -0.11                | 2/4   | 2  |
| 17    | Sulfaguanidine          | 214 | 277 | 125  | 45.1 | -0.06 | -0.06                | 3/6   | 1  |
| 18    | Sulfacetamide           | 214 | 286 | 89.3 | 31.2 | -0.11 | -1.24                | 2/4   | 1  |
| 19    | Sulfabenzamide          | 276 | 362 | 89.3 | 24.7 | 1.63  | 0.49                 | 2/4   | 2  |



**Table S9.** Physical properties of fluoroquinolones.

| Entry    | Name                 | Mw         | MSA        | PSA         | %PSA        | ClogP       | ClogD <sub>7.4</sub> | HD/HA      | RB       |
|----------|----------------------|------------|------------|-------------|-------------|-------------|----------------------|------------|----------|
| 1        | Flumequine           | 261        | 328        | 57.6        | 17.6        | 2.26        | 0.85                 | 1/4        | 1        |
| 2        | Nalidixic acid       | 232        | 313        | 70.5        | 22.5        | 1.22        | -0.27                | 1/5        | 2        |
| 3        | Oxolinic acid        | 261        | 326        | 76.1        | 23.3        | 1.35        | -0.47                | 1/6        | 2        |
| 4        | Piromidic acid       | 288        | 394        | 86.6        | 22.0        | 1.50        | -0.29                | 1/7        | 3        |
| 5        | Pipemidic acid       | 303        | 415        | 98.7        | 23.8        | 0.62        | -2.66                | 2/8        | 3        |
| 6        | Rosoxacin            | 294        | 388        | 70.5        | 18.2        | 2.04        | 0.77                 | 1/5        | 3        |
| <b>7</b> | <b>Ciprofloxacin</b> | <b>331</b> | <b>441</b> | <b>72.9</b> | <b>16.5</b> | <b>1.57</b> | <b>-1.38</b>         | <b>2/6</b> | <b>3</b> |
| 8        | Enoxacin             | 320        | 429        | 85.8        | 20.0        | 1.60        | -1.51                | 2/7        | 3        |
| 9        | Fleroxacin           | 369        | 478        | 64.1        | 13.4        | 1.83        | 0.11                 | 1/6        | 4        |
| 10       | Lomefloxacin         | 365        | 501        | 72.9        | 14.6        | 2.53        | -0.42                | 2/6        | 3        |
| 11       | Nadifloxacin         | 360        | 483        | 81.1        | 16.8        | 1.77        | 0.48                 | 2/6        | 2        |
| 12       | Norfloxacin          | 319        | 436        | 72.9        | 16.7        | 1.51        | -1.42                | 2/6        | 3        |
| 13       | Ofloxacin            | 361        | 485        | 73.3        | 15.1        | 1.51        | -0.33                | 1/7        | 2        |
| 14       | Rufloxacin           | 363        | 462        | 64.1        | 13.9        | 1.76        | -0.10                | 1/6        | 2        |
| 15       | Pefloxacin           | 333        | 468        | 64.1        | 13.7        | 1.87        | 0.20                 | 1/6        | 3        |
| 16       | Balofloxacin         | 389        | 548        | 82.1        | 15.0        | 1.89        | -1.97                | 2/7        | 5        |
| 17       | Grepafloxacin        | 359        | 500        | 72.9        | 14.6        | 2.45        | -0.47                | 2/6        | 3        |
| 18       | Pazufloxacin         | 318        | 405        | 92.9        | 22.9        | 0.70        | -2.09                | 2/6        | 2        |
| 19       | Sparfloxacin         | 392        | 517        | 98.9        | 19.1        | 2.40        | -0.66                | 3/7        | 3        |
| 20       | Temafloxacin         | 417        | 523        | 72.9        | 13.9        | 3.54        | 0.37                 | 2/6        | 3        |
| 21       | Tosufloxacin         | 404        | 483        | 99.8        | 20.7        | 2.93        | -1.23                | 2/7        | 3        |
| 22       | Clinafloxacin        | 365        | 452        | 86.9        | 19.2        | 1.80        | -2.15                | 2/6        | 3        |
| 23       | Gatifloxacin         | 375        | 517        | 82.1        | 15.9        | 1.73        | -1.33                | 2/7        | 4        |
| 24       | Gemifloxacin         | 389        | 510        | 121         | 23.8        | 2.09        | -1.89                | 2/9        | 5        |
| 25       | Moxifloxacin         | 401        | 549        | 82.1        | 15.0        | 1.85        | -1.88                | 2/7        | 4        |
| 26       | Sitafloxacin         | 410        | 497        | 86.9        | 17.5        | 2.18        | -1.48                | 2/6        | 3        |
| 27       | DX-619               | 401        | 552        | 96.1        | 17.4        | 0.92        | -2.87                | 2/7        | 5        |
| 28       | Danofloxacin         | 357        | 474        | 64.1        | 13.5        | 1.94        | 0.27                 | 1/6        | 3        |
| 29       | Garenoxacin          | 426        | 543        | 78.9        | 14.5        | 3.68        | 0.26                 | 2/6        | 5        |
| 30       | Trovafloxacin        | 416        | 487        | 99.8        | 20.5        | 2.69        | -1.32                | 2/7        | 3        |
| 31       | Difloxacin           | 399        | 519        | 64.1        | 12.4        | 3.35        | 1.65                 | 1/6        | 3        |
| 32       | ABT-492              | 441        | 473        | 120         | 25.4        | 2.66        | 0.88                 | 3/8        | 3        |

**Table S10.** Physical properties of aminoglycosides.

| Entry | Name         | Mw  | MSA | PSA | %PSA | ClogP | ClogD <sub>7.4</sub> | HD/HA | RB |
|-------|--------------|-----|-----|-----|------|-------|----------------------|-------|----|
| 1     | Gentamicin   | 494 | 773 | 234 | 30.3 | -5.03 | -13.35               | 9/13  | 7  |
| 2     | Kanamycin    | 484 | 680 | 283 | 41.6 | -7.73 | -13.39               | 11/15 | 6  |
| 3     | Netilmicin   | 476 | 745 | 200 | 26.8 | -4.74 | -12.33               | 8/12  | 8  |
| 4     | Sisomicin    | 448 | 678 | 214 | 31.6 | -5.49 | -13.16               | 8/12  | 6  |
| 5     | Ribostamycin | 454 | 641 | 262 | 40.9 | -7.06 | -12.45               | 10/14 | 6  |
| 6     | Amikacin     | 586 | 826 | 332 | 40.2 | -9.31 | -15.88               | 13/17 | 10 |
| 7     | Arbekacin    | 553 | 817 | 297 | 36.4 | -7.51 | -16.35               | 11/15 | 10 |
| 8     | Tobramycin   | 468 | 681 | 268 | 39.4 | -7.06 | -14.27               | 10/14 | 6  |
| 9     | Framycetin   | 615 | 866 | 353 | 40.8 | -9.27 | -16.87               | 13/19 | 9  |
| 10    | Streptomycin | 582 | 783 | 336 | 42.9 | -6.99 | -12.19               | 12/19 | 9  |
| 11    | Isepamicin   | 570 | 825 | 298 | 36.1 | -8.20 | -14.10               | 12/16 | 9  |
| 12    | Paromomycin  | 616 | 859 | 347 | 40.4 | -9.23 | -15.41               | 13/19 | 9  |
| 13    | Neomycin C   | 615 | 870 | 353 | 40.6 | -9.27 | -16.87               | 13/19 | 9  |

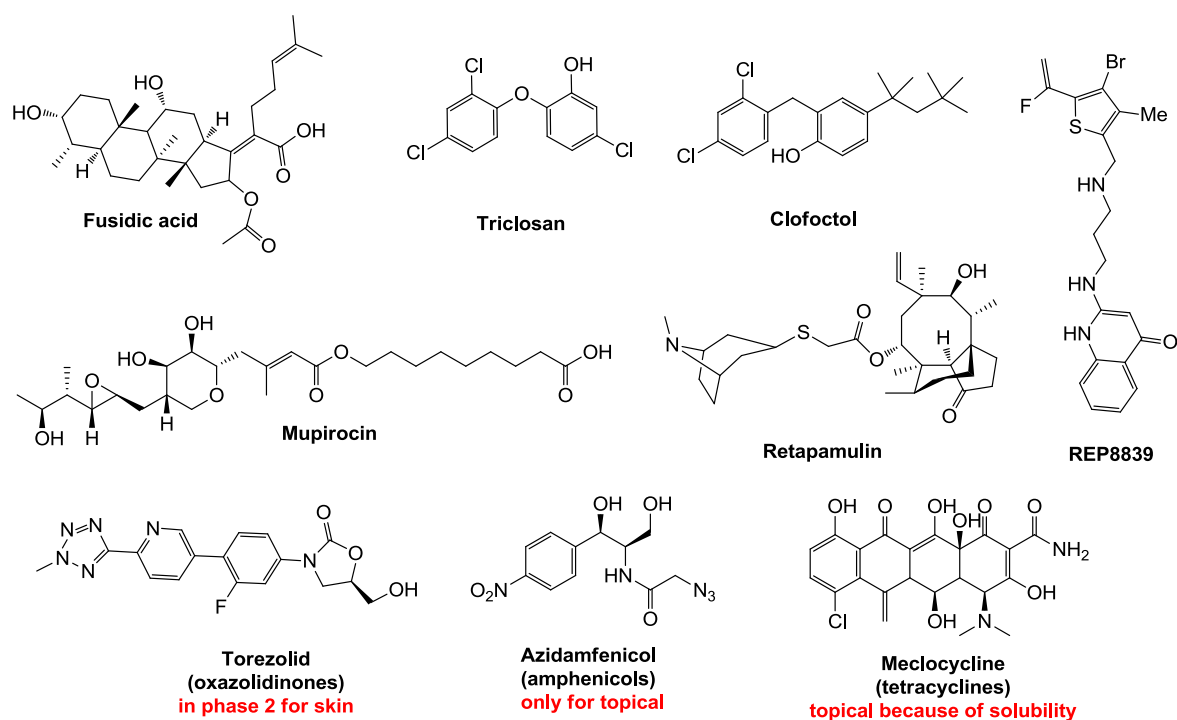**Figure S6.** Structures of topical antibiotics.

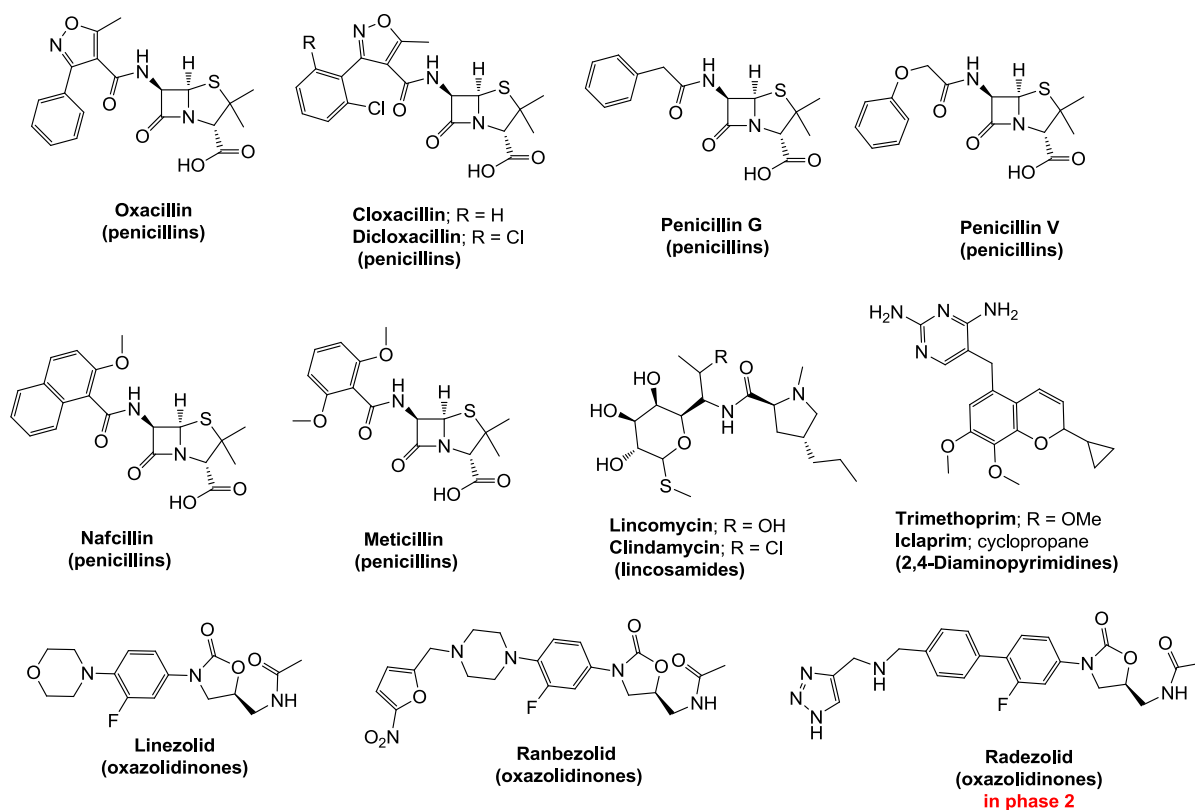

**Figure S7.** Gram-positive only active penicillins, lincosamides and oxazolidinones.

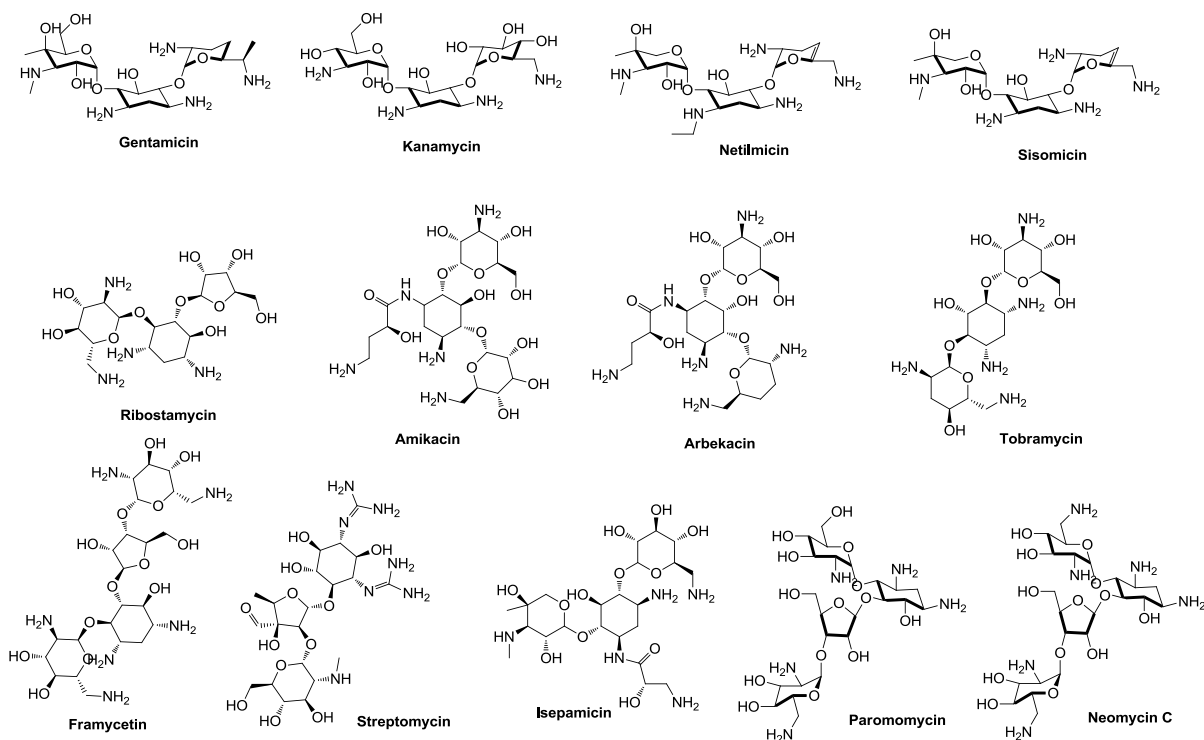

**Figure S8.** Structures of aminoglycosides.

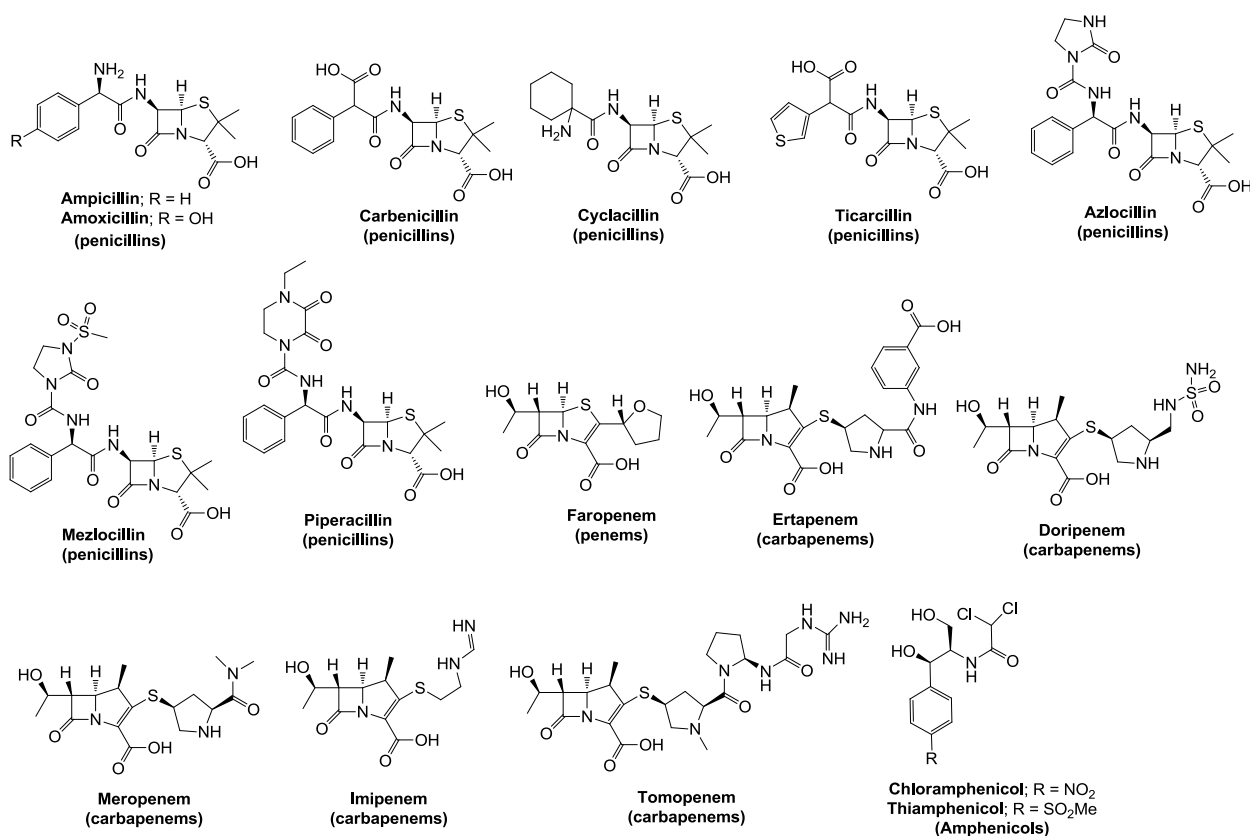

**Figure S9.** Structures of Gram positive and negative penicillins and amphenicols.

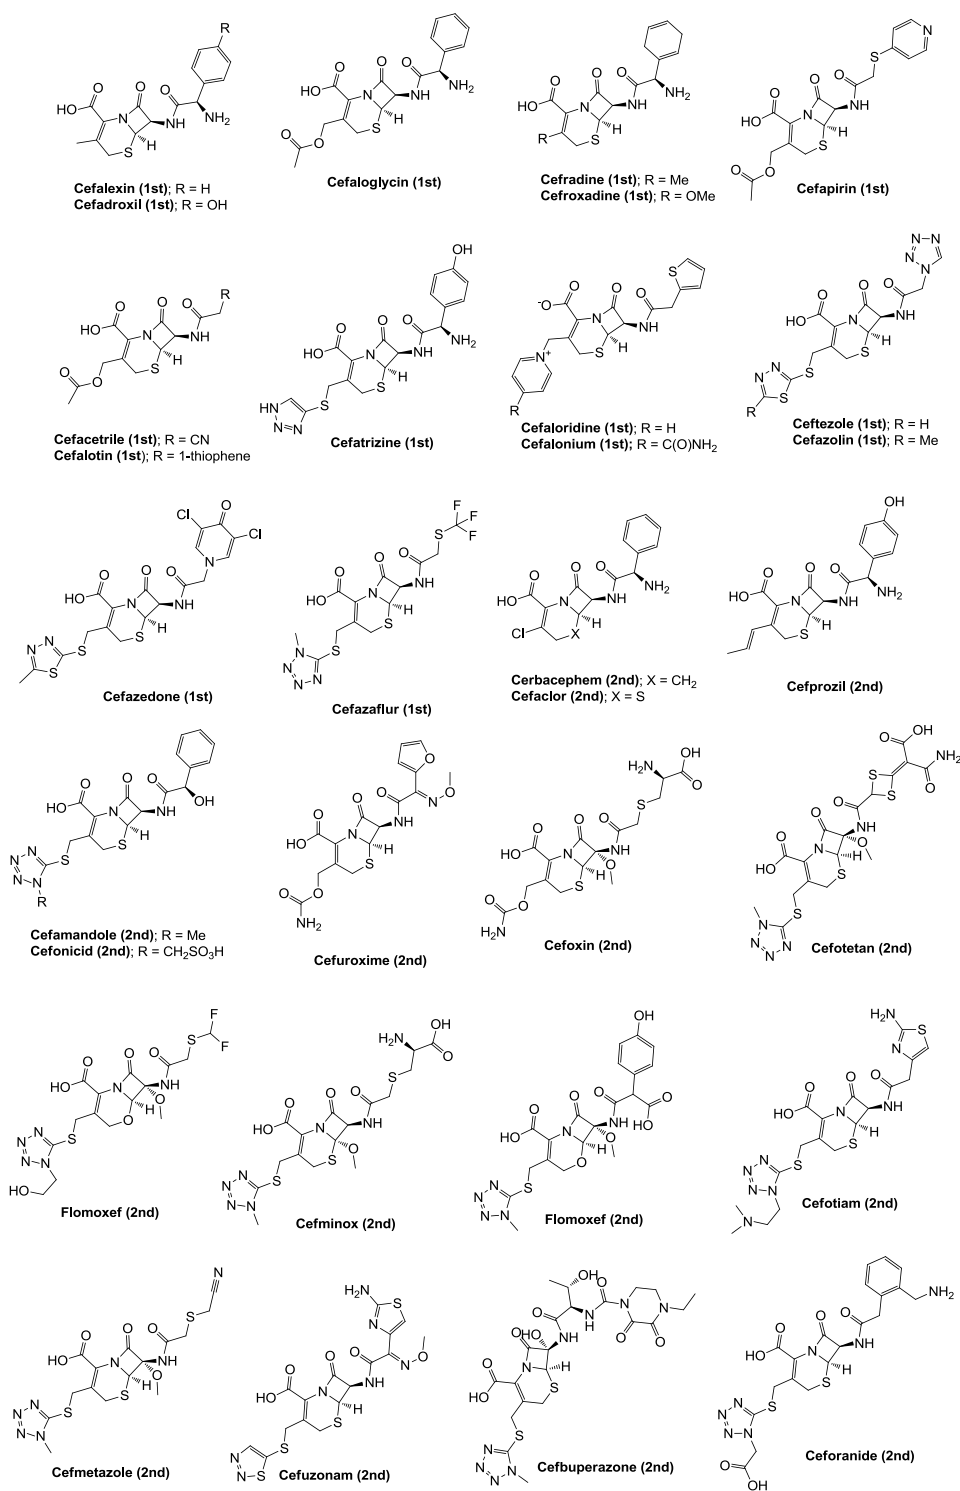

**Figure S10.** Structures of Cephalosporin antibiotics (1st and 2nd generations).

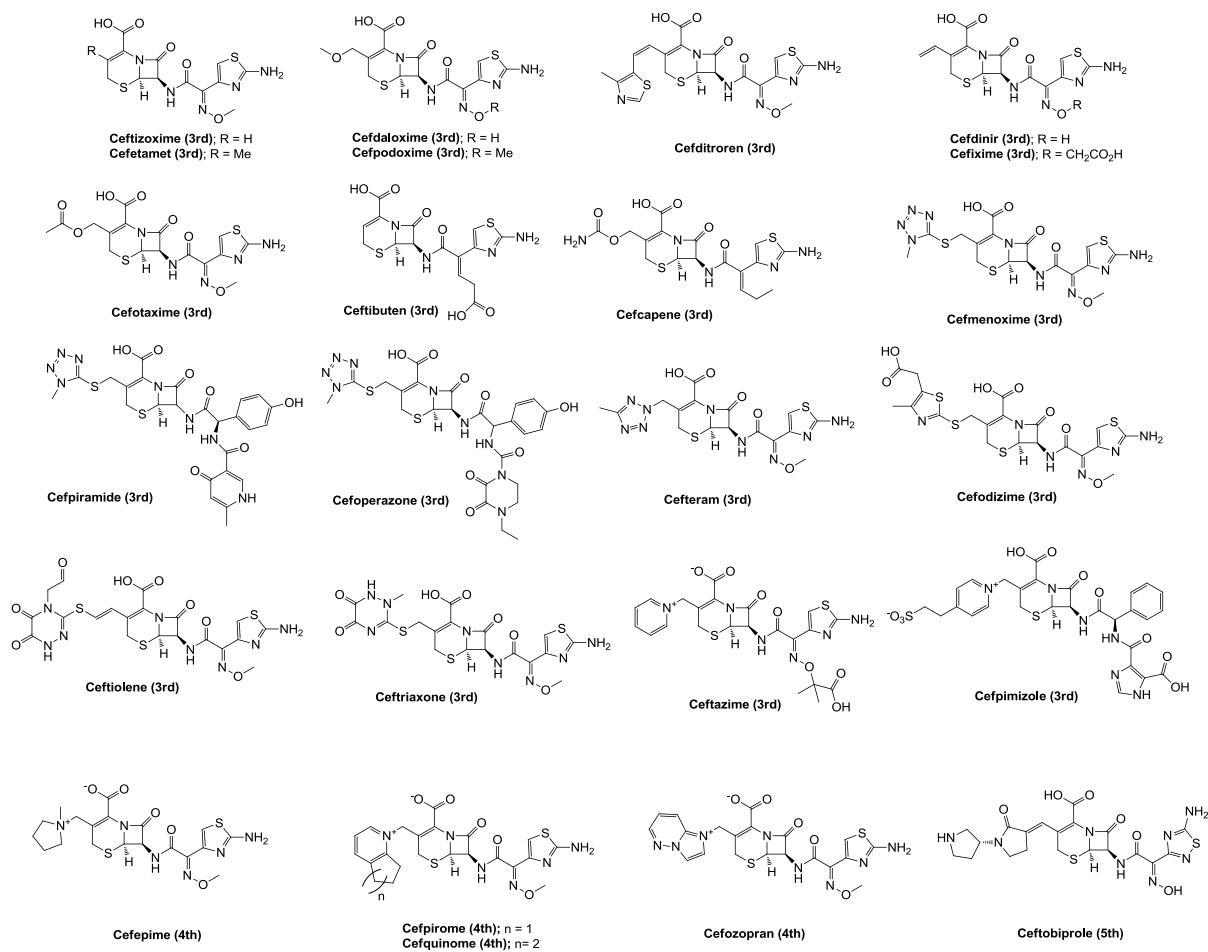

**Figure S11.** Structures of Cephalosporin antibiotics (3rd–5th generations).

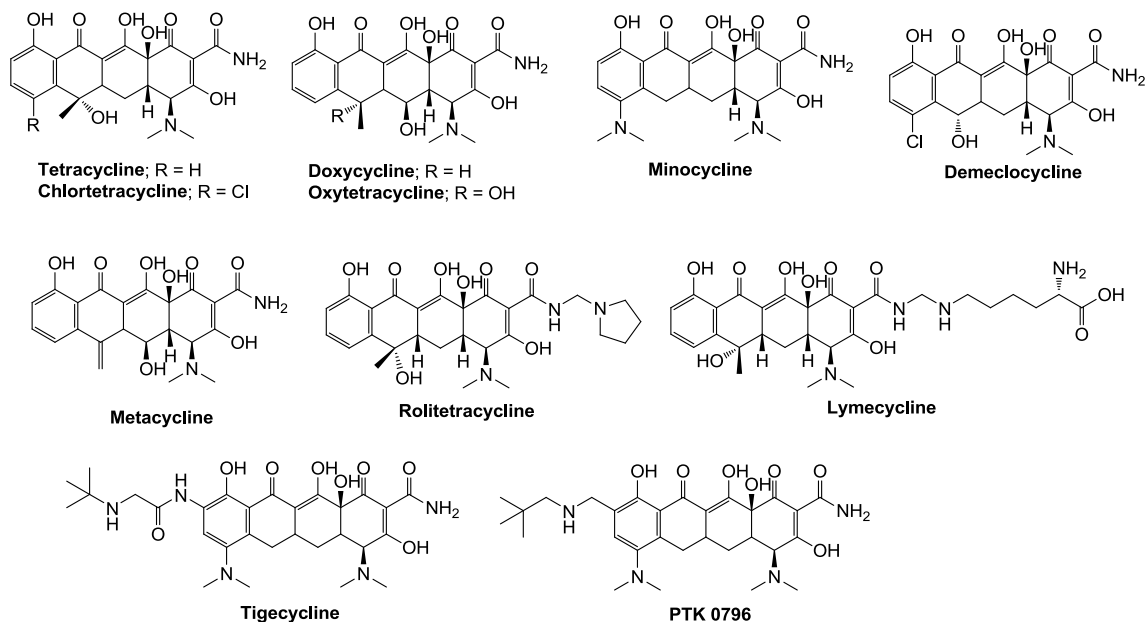

**Figure S12.** Structures of tetracyclines.

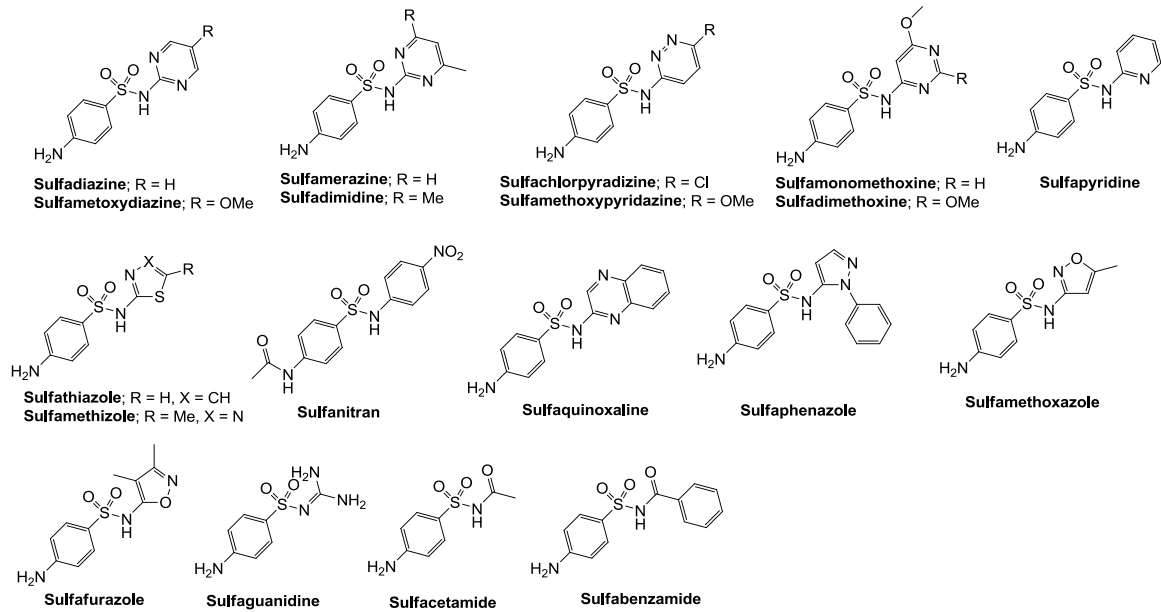

Figure S13. Structures of sulfa drugs.

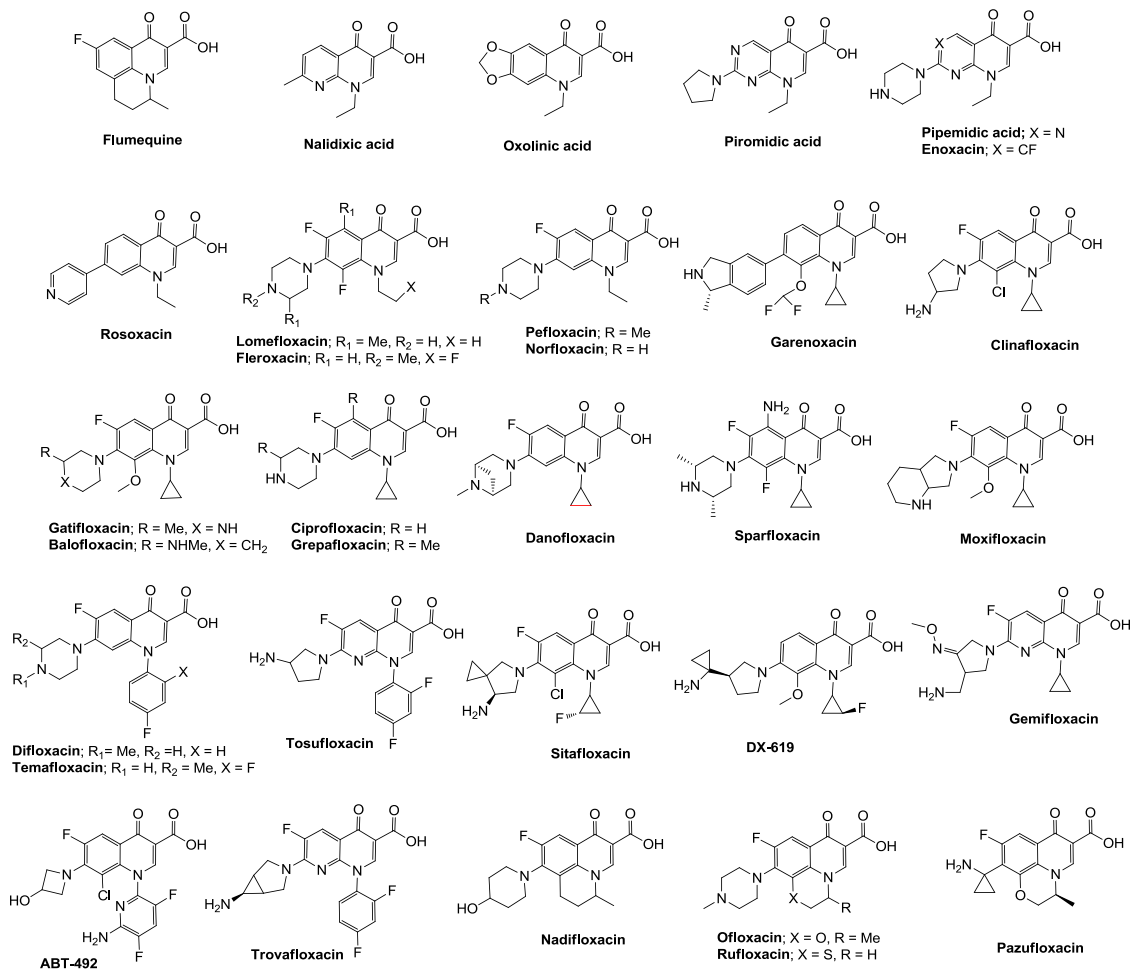

Figure S14. Structures of fluoroquinolones.

**Spartan Calculation Data****2a endo-enol**

Spartan '02 Mechanics Program: (PC/x86) Release 115B

Reason for exit: Successful completion

Mechanics CPU Time : 000:00:00.3

Mechanics Wall Time: 000:00:00.3

Spartan '02 Quantum Mechanics Program: (PC/x86) Release 115B

To use a standard Pseudopotential a heavy atom must exist

(An atom larger than 'Ar')

Job type: Geometry optimization.

Method: RB3LYP

Basis set: LACVP\*

Number of shells: 104

Number of basis functions: 230

SCF model:

A restricted hybrid HF-DFT SCF calculation will be performed using Pulay DIIS extrapolation

Optimization:

| Step | Energy       | Max Grad. | Max Dist. |
|------|--------------|-----------|-----------|
| 1    | -721.3188486 | 0.033624  | 0.078653  |
| 2    | -721.3308940 | 0.016086  | 0.127985  |
| 3    | -721.3333004 | 0.012471  | 0.103943  |
| 4    | -721.3342245 | 0.007061  | 0.135359  |
| 5    | -721.3346190 | 0.002968  | 0.210012  |
| 6    | -721.3347204 | 0.004707  | 0.157507  |
| 7    | -721.3348419 | 0.002430  | 0.218716  |
| 8    | -721.3348432 | 0.002043  | 0.134983  |
| 9    | -721.3348046 | 0.005487  | 0.083404  |
| 10   | -721.3349435 | 0.001104  | 0.029607  |
| 11   | -721.3349530 | 0.000264  | 0.013534  |
| 12   | -721.3349531 | 0.000214  | 0.004257  |

Reason for exit: Successful completion

Quantum Mechanics Program CPU Time : 001:13:59.5

Quantum Mechanics Program Wall Time: 001:14:40.5

Spartan '02 Properties Program: (PC/x86) Release 115B

Reason for exit: Successful completion

Properties Program CPU Time : 000:00:00.6

Properties Program Wall Time: 000:00:00.7

**2a exo-enol**

Spartan '02 Mechanics Program: (PC/x86) Release 115B

Reason for exit: Successful completion

Mechanics CPU Time : 000:00:00.2

Mechanics Wall Time: 000:00:00.2

Spartan '02 Quantum Mechanics Program: (PC/x86) Release 115B

To use a standard Pseudopotential a heavy atom must exist



(An atom larger than 'Ar')

Job type: Geometry optimization.

Method: RB3LYP

Basis set: LACVP\*

Number of shells: 104

Number of basis functions: 230

SCF model:

A restricted hybrid HF-DFT SCF calculation will be performed using Pulay DIIS extrapolation

Optimization:

| Step | Energy       | Max Grad. | Max Dist. |   |
|------|--------------|-----------|-----------|---|
| 1    | -721.3263787 | 0.032326  | 0.113498  | 1 |
| 2    | -721.3370556 | 0.018469  | 0.126549  | 1 |
| 3    | -721.3383956 | 0.006959  | 0.047221  | 1 |
| 4    | -721.3387449 | 0.004516  | 0.204974  | 1 |
| 5    | -721.3389192 | 0.002930  | 0.190566  | 1 |
| 6    | -721.3388968 | 0.001947  | 0.207503  |   |
| 7    | -721.3389925 | 0.003011  | 0.086110  |   |
| 8    | -721.3389887 | 0.002448  | 0.173256  |   |
| 9    | -721.3390866 | 0.002429  | 0.123832  |   |
| 10   | -721.3390916 | 0.000901  | 0.090482  |   |
| 11   | -721.3391152 | 0.000999  | 0.015727  |   |
| 12   | -721.3391209 | 0.001146  | 0.018765  |   |
| 13   | -721.3391254 | 0.000996  | 0.024971  |   |
| 14   | -721.3391220 | 0.000984  | 0.013254  |   |
| 15   | -721.3391225 | 0.000908  | 0.015705  |   |
| 16   | -721.3391255 | 0.000908  | 0.025376  |   |
| 17   | -721.3391308 | 0.000868  | 0.045755  |   |
| 18   | -721.3391351 | 0.000957  | 0.078654  |   |
| 19   | -721.3391434 | 0.001057  | 0.106313  |   |
| 20   | -721.3391527 | 0.000909  | 0.111160  |   |
| 21   | -721.3391706 | 0.000368  | 0.052632  |   |
| 22   | -721.3391826 | 0.000266  | 0.007876  |   |
| 23   | -721.3391804 | 0.000125  | 0.008678  |   |
| 24   | -721.3391816 | 0.000022  | 0.002365  |   |
| 25   | -721.3391832 | 0.000011  | 0.000781  |   |

Reason for exit: Successful completion

Quantum Mechanics Program CPU Time : 002:14:01.3

Quantum Mechanics Program Wall Time: 002:15:10.1

Spartan '02 Properties Program: (PC/×86)

Release 115B

Reason for exit: Successful completion

Properties Program CPU Time : 000:00:00.6

#### 43a endo-enol

Spartan '02 Mechanics Program: (PC/×86)

Release 115B

Reason for exit: Successful completion

Mechanics CPU Time : 000:00:00.3

Mechanics Wall Time: 000:00:00.4

Spartan '02 Quantum Mechanics Program: (PC/×86) Release 115B

To use a standard Psuedopotential a heavy atom must exists  
(An atom larger than 'Ar')

Job type: Geometry optimization.

Method: RB3LYP

Basis set: LACVP\*

Number of shells: 112

Number of basis functions: 247

SCF model:

A restricted hybrid HF-DFT SCF calculation will be  
performed using Pulay DIIS extrapolation

Optimization:

| Step | Energy       | Max Grad. | Max Dist. |
|------|--------------|-----------|-----------|
| 1    | -776.6951997 | 0.046908  | 0.096893  |
| 2    | -776.7079966 | 0.019827  | 0.037601  |
| 3    | -776.7096040 | 0.006526  | 0.024911  |
| 4    | -776.7100745 | 0.003761  | 0.010782  |
| 5    | -776.7101654 | 0.001752  | 0.009819  |
| 6    | -776.7102003 | 0.000709  | 0.005156  |
| 7    | -776.7102072 | 0.000187  | 0.000557  |

Reason for exit: Successful completion

Quantum Mechanics Program CPU Time : 000:51:47.3

Quantum Mechanics Program Wall Time: 000:52:13.6

Spartan '02 Properties Program: (PC/×86) Release 115B

Orientation rotated by 179.999994991044 degrees!

Reason for exit: Successful completion

Properties Program CPU Time : 000:00:00.8

Properties Program Wall Time: 000:00:00.8

#### 43a exo-enol

Spartan '02 Mechanics Program: (PC/×86) Release 115B

Reason for exit: Successful completion

Mechanics CPU Time : 000:00:00.2

Mechanics Wall Time: 000:00:00.3

Spartan '02 Quantum Mechanics Program: (PC/x86) Release 115B

To use a standard Psuedopotential a heavy atom must exists  
(An atom larger than 'Ar')

Job type: Geometry optimization.

Method: RB3LYP

Basis set: LACVP\*

Number of shells: 112

Number of basis functions: 247

SCF model:

A restricted hybrid HF-DFT SCF calculation will be  
performed using Pulay DIIS extrapolation

## Optimization:

| Step | Energy       | Max Grad. | Max Dist. |
|------|--------------|-----------|-----------|
| 1    | -776.6966514 | 0.046695  | 0.131846  |
| 2    | -776.7110719 | 0.015006  | 0.044762  |
| 3    | -776.7129486 | 0.006951  | 0.021776  |
| 4    | -776.7132746 | 0.002265  | 0.005289  |
| 5    | -776.7133219 | 0.000872  | 0.003559  |
| 6    | -776.7133319 | 0.000303  | 0.001371  |
| 7    | -776.7133347 | 0.000075  | 0.000230  |

Reason for exit: Successful completion

Quantum Mechanics Program CPU Time : 000:49:17.3

Quantum Mechanics Program Wall Time: 000:49:38.5

Spartan '02 Properties Program: (PC/×86)

Release 115B

Orientation rotated by 179.999994991044 degrees!

Reason for exit: Successful completion

Properties Program CPU Time : 000:00:00.8

Properties Program Wall Time: 000:00:00.8

**43b endo-enol**

Spartan '02 Mechanics Program: (PC/×86)

Release 115B

Reason for exit: Successful completion

Mechanics CPU Time : 000:00:00.3

Mechanics Wall Time: 000:00:00.3

Spartan '02 Quantum Mechanics Program: (PC/×86)

Release 115B

To use a standard Pseudopotential a heavy atom must exist

(An atom larger than 'Ar')

Job type: Geometry optimization.

Method: RB3LYP

Basis set: LACVP\*

Number of shells: 110

Number of basis functions: 245

SCF model:

A restricted hybrid HF-DFT SCF calculation will be performed using Pulay DIIS extrapolation

## Optimization:

| Step | Energy       | Max Grad. | Max Dist. |
|------|--------------|-----------|-----------|
| 1    | -796.5398353 | 0.031101  | 0.081303  |
| 2    | -796.5514058 | 0.011737  | 0.115368  |
| 3    | -796.5539497 | 0.009158  | 0.125261  |
| 4    | -796.5553533 | 0.002656  | 0.200584  |
| 5    | -796.5556053 | 0.002332  | 0.171176  |
| 6    | -796.5557240 | 0.002477  | 0.189063  |
| 7    | -796.5557514 | 0.002169  | 0.040229  |
| 8    | -796.5557948 | 0.001725  | 0.046947  |
| 9    | -796.5557987 | 0.001456  | 0.027589  |
| 10   | -796.5558121 | 0.000259  | 0.009347  |
| 11   | -796.5558110 | 0.000136  | 0.006829  |
| 12   | -796.5558111 | 0.000094  | 0.013612  |

Reason for exit: Successful completion  
 Quantum Mechanics Program CPU Time : 001:18:46.1  
 Quantum Mechanics Program Wall Time: 001:19:35.8

Spartan '02 Properties Program: (PC/×86) Release 115B

Reason for exit: Successful completion  
 Properties Program CPU Time : 000:00:00.8  
 Properties Program Wall Time: 000:00:00.9

#### 43b exo-enol

Spartan '02 Mechanics Program: (PC/×86) Release 115B

Reason for exit: Successful completion  
 Mechanics CPU Time : 000:00:00.2  
 Mechanics Wall Time: 000:00:00.2

Spartan '02 Quantum Mechanics Program: (PC/x86) Release 115B

To use a standard Psuedopotential a heavy atom must exists  
 (An atom larger than 'Ar')

Job type: Geometry optimization.

Method: RB3LYP

Basis set: LACVP\*

Number of shells: 110

Number of basis functions: 245

SCF model:

A restricted hybrid HF-DFT SCF calculation will be  
 performed using Pulay DIIS extrapolation

Optimization:

| Step | Energy       | Max Grad. | Max Dist. |
|------|--------------|-----------|-----------|
| 1    | -796.5309818 | 0.040547  | 0.109151  |
| 2    | -796.5474243 | 0.018759  | 0.126703  |
| 3    | -796.5497678 | 0.010188  | 0.115629  |
| 4    | -796.5505489 | 0.009241  | 0.102296  |
| 5    | -796.5513235 | 0.003616  | 0.199455  |
| 6    | -796.5514271 | 0.003953  | 0.134447  |
| 7    | -796.5516225 | 0.003191  | 0.161288  |
| 8    | -796.5515938 | 0.002848  | 0.231051  |
| 9    | -796.5517480 | 0.002009  | 0.157874  |
| 10   | -796.5517238 | 0.002433  | 0.209888  |
| 11   | -796.5518567 | 0.001892  | 0.110813  |
| 12   | -796.5518573 | 0.001583  | 0.125314  |
| 13   | -796.5518868 | 0.000898  | 0.043009  |
| 14   | -796.5518925 | 0.000637  | 0.020466  |
| 15   | -796.5518905 | 0.000204  | 0.012587  |
| 16   | -796.5518938 | 0.000154  | 0.011356  |
| 17   | -796.5518937 | 0.000140  | 0.002354  |

Reason for exit: Successful completion  
 Quantum Mechanics Program CPU Time: 001:55:05.9  
 Quantum Mechanics Program Wall Time: 001:56:02.5

Spartan '02 Properties Program: (PC/x86) Release 115B  
 Reason for exit: Successful completion  
 Properties Program CPU Time : 000:00:00.8  
 Properties Program Wall Time: 000:00:00.8

**43c endo-enol**

Spartan '02 Mechanics Program: (PC/x86) Release 115B  
 Reason for exit: Successful completion  
 Mechanics CPU Time : 000:00:00.2  
 Mechanics Wall Time: 000:00:00.3

Spartan '02 Quantum Mechanics Program: (PC/x86) Release 115B  
 To use a standard Pseudopotential a heavy atom must exist  
 (An atom larger than 'Ar')

Job type: Geometry optimization.  
 Method: RB3LYP  
 Basis set: LACVP\*  
 Number of shells: 116  
 Number of basis functions: 251

## SCF model:

A restricted hybrid HF-DFT SCF calculation will be performed using Pulay DIIS extrapolation

## Optimization:

| Step | Energy       | Max Grad. | Max Dist. |
|------|--------------|-----------|-----------|
| 1    | -740.7411033 | 0.027986  | 0.138068  |
| 2    | -740.7531158 | 0.012369  | 0.160457  |
| 3    | -740.7572300 | 0.010632  | 0.160369  |
| 4    | -740.7598000 | 0.008894  | 0.133589  |
| 5    | -740.7612865 | 0.010822  | 0.166581  |
| 6    | -740.7622362 | 0.013628  | 0.131936  |
| 7    | -740.7648297 | 0.016571  | 0.170287  |
| 8    | -740.7678508 | 0.072216  | 0.181196  |
| 9    | -740.7661919 | 0.123149  | 0.094622  |
| 10   | -740.7742026 | 0.029218  | 0.081418  |
| 11   | -740.7764886 | 0.033657  | 0.163726  |
| 12   | -740.7787096 | 0.012189  | 0.206396  |
| 13   | -740.7787037 | 0.114526  | 0.096824  |
| 14   | -740.7785679 | 0.085077  | 0.112683  |
| 15   | -740.7799352 | 0.014139  | 0.048742  |
| 16   | -740.7802972 | 0.009886  | 0.124529  |
| 17   | -740.7804272 | 0.001948  | 0.182666  |
| 18   | -740.7804337 | 0.011901  | 0.143527  |
| 19   | -740.7805176 | 0.011679  | 0.042119  |
| 20   | -740.7805533 | 0.003066  | 0.104964  |
| 21   | -740.7806003 | 0.003279  | 0.161397  |
| 22   | -740.7806736 | 0.001733  | 0.168561  |
| 23   | -740.7807771 | 0.003138  | 0.134783  |
| 24   | -740.7808980 | 0.006986  | 0.119081  |
| 25   | -740.7810368 | 0.008778  | 0.160896  |
| 26   | -740.7811143 | 0.004827  | 0.054200  |

|    |              |          |          |
|----|--------------|----------|----------|
| 27 | -740.7811699 | 0.006834 | 0.061373 |
| 28 | -740.7811908 | 0.000564 | 0.013420 |
| 29 | -740.7811953 | 0.000140 | 0.010785 |
| 30 | -740.7811978 | 0.000619 | 0.007744 |
| 31 | -740.7811998 | 0.000120 | 0.004211 |
| 32 | -740.7811964 | 0.000032 | 0.000856 |

Reason for exit: Successful completion

Quantum Mechanics Program CPU Time : 003:49:54.6

Quantum Mechanics Program Wall Time: 003:51:52.6

Spartan '02 Properties Program: (PC/x86)

Release 115B

Reason for exit: Successful completion

Properties Program CPU Time : 000:00:00.8

Properties Program Wall Time: 000:00:00.9

### 43c exo-enol

Spartan '02 Mechanics Program: (PC/x86)

Release 115B

Reason for exit: Successful completion

Mechanics CPU Time : 000:00:00.3

Mechanics Wall Time: 000:00:00.3

Spartan '02 Quantum Mechanics Program: (PC/x86)

Release 115B

To use a standard Psuedopotential a heavy atom must exists

(An atom larger than 'Ar')

Job type: Geometry optimization.

Method: RB3LYP

Basis set: LACVP\*

Number of shells: 116

Number of basis functions: 251

SCF model:

A restricted hybrid HF-DFT SCF calculation will be performed using Pulay DIIS extrapolation

Optimization:

| Step | Energy       | Max Grad. | Max Dist. |   |
|------|--------------|-----------|-----------|---|
| 1    | -740.7654588 | 0.030768  | 0.109693  | 1 |
| 2    | -740.7768503 | 0.009971  | 0.107683  | 1 |
| 3    | -740.7791640 | 0.005401  | 0.122953  | 1 |
| 4    | -740.7799392 | 0.001780  | 0.144484  | 1 |
| 5    | -740.7802953 | 0.002154  | 0.137447  |   |
| 6    | -740.7805198 | 0.002010  | 0.146240  |   |
| 7    | -740.7806576 | 0.001639  | 0.176762  |   |
| 8    | -740.7807983 | 0.002028  | 0.182191  |   |
| 9    | -740.7809267 | 0.002555  | 0.208698  |   |
| 10   | -740.7810108 | 0.003344  | 0.209505  |   |
| 11   | -740.7811067 | 0.002266  | 0.174507  |   |
| 12   | -740.7811445 | 0.001757  | 0.092090  |   |
| 13   | -740.7811758 | 0.000606  | 0.054986  |   |
| 14   | -740.7811757 | 0.001023  | 0.034879  |   |
| 15   | -740.7811867 | 0.000547  | 0.014782  |   |

|    |              |          |          |
|----|--------------|----------|----------|
| 16 | -740.7811922 | 0.000398 | 0.019310 |
| 17 | -740.7811903 | 0.000193 | 0.009492 |
| 18 | -740.7811931 | 0.000158 | 0.007443 |
| 19 | -740.7811914 | 0.000093 | 0.002956 |
| 20 | -740.7811951 | 0.000034 | 0.001365 |
| 21 | -740.7811955 | 0.000007 | 0.000780 |

Reason for exit: Successful completion

Quantum Mechanics Program CPU Time : 002:20:07.9

Quantum Mechanics Program Wall Time: 002:23:11.8

Spartan '02 Properties Program: (PC/×86)

Release 115B

Reason for exit: Successful completion

Properties Program CPU Time: 000:00:00.9

Properties Program Wall Time: 000:00:01.0

## References

1. Jeong, Y.-C.; Anwar, M.; Moloney, M.G.; Bikadi, Z.; Hazai, E. *Chem. Sci.*, **2013**, *4*, 1008–1015.
2. Jeong, Y.-C.; Moloney, M.G.; Bikadi, Z.; Hazai, E. *ChemMedChem* **2014**, *9*, 1826–1837.
3. Jeong, Y.-C.; Moloney, M.G. *Beilstein J. Org. Chem.* **2013**, *9*, 1899–1906.
4. Jeong, Y.-C.; Anwar, M.; Moloney, M.G.; Bikadi, Z.; Hazai, E. *Biorg. Med. Chem. Lett.* **2014**, *24*, 1901–1906.
5. Critchley, I.A.; Ochsner, U. A Recent advances in the preclinical evaluation of the topical antibacterial agent REP8839. *Curr. Opin. Chem. Biol.* **2008**, *12*, 409–417.
6. O'Shea, R.; Moser, H.E. Physicochemical properties of antibacterial compounds: Implications for drug discovery. *J. Med. Chem.* **2008**, *51*, 2871–2878.
7. Kohlhoff, S.A.; Sharma, R. Iclaprim. *Expert Opin. Investig. Drugs* **2007**, *16*, 1441–1448.
8. Othersen, O.G.; Beierlein, F.; Lanig, H.; Clark, T. Conformations and tautomers of tetracycline. *J. Phys. Chem. B* **2003**, *107*, 13743–13749.
